# Supplementary material for: Gold-catalyzed carboalkoxylations of 2-ethynylbenzyl ethers to form 1- and 3-substituted 2-methoxy-1-H-indenes: Brønsted acids versus gold catalysis
Source: Royal Society of Chemistry journal article supplement (doi:10.1039/c4ob01794c), 2014-01-01

## *Supporting Information*

### **Gold-catalyzed Carboalkoxylations of 2-Ethynylbenzyl Ethers to Form 1- and 3-Substituted 2-Methoxy-1-*H*-indenes: Brønsted Acid Versus Gold Catalysis**

Chun-Hao Chen,<sup>a</sup> Chiou-Dong Wang,<sup>a</sup> Yi-Feng Hsieh and Rai-Shung Liu<sup>a,\*</sup>

Department of Chemistry, National Tsing-Hua University, Hsinchu, Taiwan,  
ROC

E-mail: [rsliu@mx.nthu.edu.tw](mailto:rsliu@mx.nthu.edu.tw)

#### **Contents:**

##### **(I) Representative Synthetic Procedures**

(a) General procedure-----S2

##### **(II) Procedures for catalytic operations**

(a) The synthesis of 1-phenyl-2-methoxyindene (**2a**)-----S2

(b) The synthesis of 3-phenyl-2-methoxyindene (**2a'**)-----S2-S3

(c) The ozonolysis of 1-phenyl-2-methoxyindene (**5a**)-----S3

(d) The ozonolysis of 3-phenyl-2-methoxyindene (**6a**)-----S3-S4

**(III) Spectral data for new compounds** -----S4-S23

## (I) Representative Synthetic Procedures:

### (a) General procedure:

Unless otherwise noted, all the reactions for the preparation of the substrates were performed in oven-dried glassware under nitrogen atmosphere with freshly distilled solvents. The catalytic reactions were performed under Nitrogen atmosphere. DCE, DCM and CH<sub>3</sub>CN were distilled from CaH<sub>2</sub> under nitrogen. THF were distilled from Na metal under nitrogen. All other commercial reagents were used without further purification, unless otherwise indicated. <sup>1</sup>H NMR and <sup>13</sup>C NMR spectra were recorded on a Varian 400 MHz, Bruker 400 and 600 MHz Spectrometers using chloroform-*d* (CDCl<sub>3</sub>) and CD<sub>2</sub>Cl<sub>2</sub> as the internal standards. All 2-ethynylbenzyl ethers were prepared from the reported procedure in the literature<sup>[S1]</sup>

S1. C.-D. Wang, Y.-F. Hsieh, R.-S. Liu, *Adv. Synth. Catal.* **2014**, *356*, 144-152.

## (II) Standard procedures for catalytic operations:

### (a) Typical procedure for the synthesis of 1-phenyl-2-methoxyindene (2a)

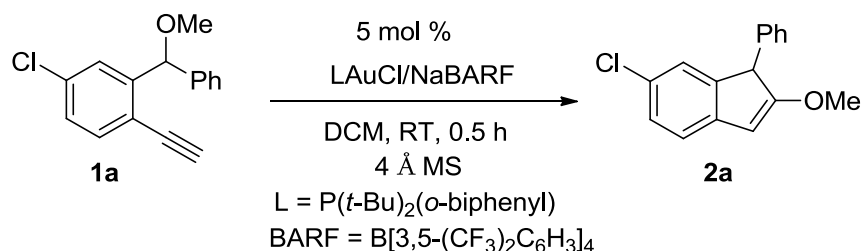

After adding 4 Å molecular sieves (60 mg), a dichloromethane (1.0 mL) solution of AuCl(*t*-Bu)<sub>2</sub>P(*o*-biphenyl) (6.2 mg, 5 mol %) and NaBARF (10.3 mg, 5 mol %) was stirred at rt for 10 min, and to this solution was slowly added a dichloromethane (1.3 mL) solution of 4-chloro-1-ethynyl-2-(methoxy(phenyl)methyl)benzene (**1a**) (60 mg, 0.2 mmol) at rt. The solution was stirred for 0.5 h before it was filtered over a Celite bed. The solvent was evaporated under reduced pressure, and the residue was purified on a flash silica gel column to give compound **2a** (54 mg, 90% yield) as yellow oil.

### (b) Typical procedure for the synthesis of 3-phenyl-2-methoxyindene (2a')

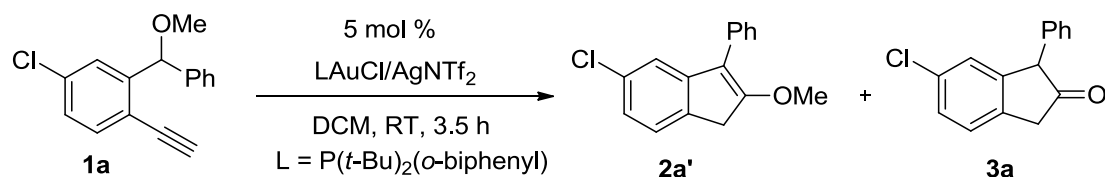

A dichloromethane (1.0 mL) solution of AuCl(*t*-Bu)<sub>2</sub>P(*o*-biphenyl) (6.2 mg, 5 mol%) and AgNTf<sub>2</sub> (4.4 mg, 5 mol %) was stirred at rt for 10 min, and to this solution was slowly added a dichloromethane (1.3 mL) solution of 4-chloro-1-ethynyl-2-(methoxy(phenyl)methyl)benzene (**1a**) (60 mg, 0.2 mmol) at rt. The solution was stirred for 3.5 h before it was filtered over a Celite bed. The solvent was evaporated under reduced pressure, and the residue was purified on a flash silica gel column to give compound **2a'** (42.6 mg, 0.17 mmol, 71% yield) as yellow oil and **3a** (14.2 mg, 0.06 mmol, 25%) as yellow oil.

**(c) Typical procedure for the ozonolysis of 1-phenyl-2-methoxyindene (**5a**)**

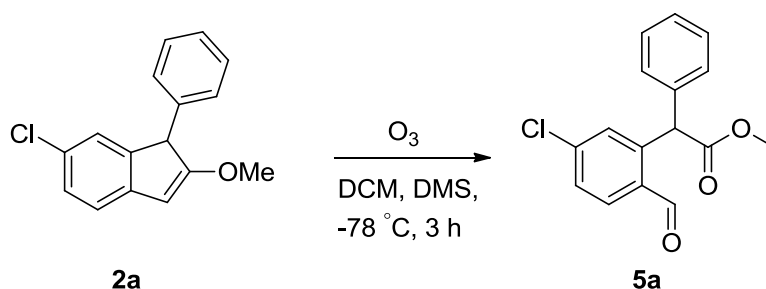

A dichloromethane (2.3 ml) solution of compound **2a** (60 mg, 0.2 mmol) was cooled to -78 °C, and to this solution was introduced with a stream of O<sub>3</sub>/O<sub>2</sub> (~ 1 mmol/min of O<sub>3</sub>) for one min. The solution was stirred at rt for 1 h. The resulting mixture was allowed to reach -78 °C and carefully quenched by addition of DMS (21.8 mg, 0.4 mmol). After 1 h, the solvent was evaporated under reduced pressure, and the residue was purified on a flash silica gel column to give compound **5a** (54.7 mg, 0.19 mmol, 81% yield) as yellow oil.

**(d) Typical procedure for the ozonolysis of 3-phenyl-2-methoxyindene (**6a**)**

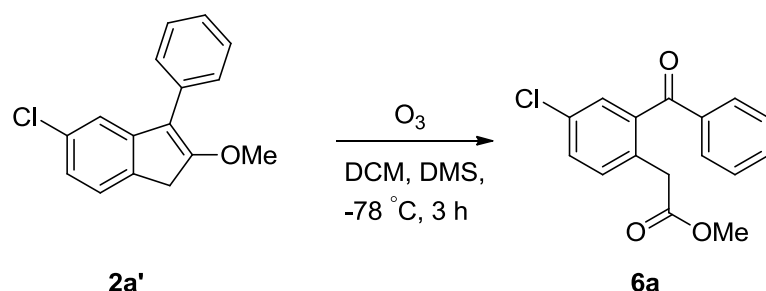

A dichloromethane (2.3 ml) solution of compound **2a'** (60 mg, 0.2 mmol) was cooled to -78 °C, and to this solution was introduced with a stream of O<sub>3</sub>/O<sub>2</sub> (~ 1 mmol/min of O<sub>3</sub>) for one min. The solution was stirred at rt for 1 h. The resulting mixture was allowed to reach -78 °C and carefully quenched by addition of DMS (21.8 mg, 0.4 mmol). After 1 h, the solvent was evaporated under reduced pressure,

and the residue was purified on a flash silica gel column to give compound **6a** ( 52.6 mg, 0.18 mmol, 78% yield) as yellow oil.

### (III) Spectral Data:

#### Spectral data for 4-(*tert*-butyl)-1-ethynyl-2-(methoxy(phenyl)methyl)benzene (**1h**)

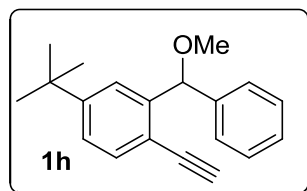

$^1\text{H}$  NMR (600 MHz,  $\text{CDCl}_3$ ):  $\delta$  7.69 (d,  $J = 1.8$  Hz, 1H), 7.51~7.55 (m, 3H), 7.38~7.40 (m, 2H), 7.30~7.33 (m, 2H), 5.92 (s, 1H), 3.49 (s, 3H), 3.36 (s, 1H), 1.38 (s, 9H);  $^{13}\text{C}$  NMR (150 MHz,  $\text{CDCl}_3$ ):  $\delta$  152.5, 143.9, 141.5, 132.5, 128.1, 127.3, 126.9, 124.2, 122.9, 118.0, 82.4, 82.1, 81.4, 56.9, 34.8, 31.1. HRMS(EI) calcd. for  $\text{C}_{20}\text{H}_{22}\text{O}$ : 278.1671, found 278.1667.

#### Spectral data for 4-chloro-1-ethynyl-2-(methoxy(*p*-tolyl)methyl)benzene (**1k**)

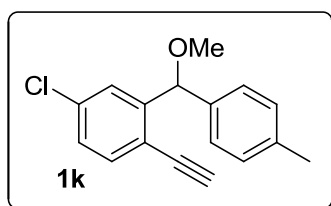

$^1\text{H}$  NMR (600 MHz,  $\text{CDCl}_3$ ):  $\delta$  7.65 (d,  $J = 1.8$  Hz, 1H), 7.44 (d,  $J = 8.4$  Hz, 1H), 7.39 (d,  $J = 7.8$  Hz, 2H), 7.22 (dd,  $J = 8.4, 1.8$  Hz, 1H), 7.19 (d,  $J = 7.8$  Hz, 2H), 5.80 (s, 1H), 3.44 (s, 3H), 3.43 (s, 1H), 2.37 (s, 3H);  $^{13}\text{C}$  NMR (150 MHz,  $\text{CDCl}_3$ ):  $\delta$  146.7, 137.6, 137.3, 135.4, 133.9, 129.0, 127.4, 126.8, 126.3, 119.1, 83.1, 81.7, 80.9, 56.9, 21.0. HRMS(EI) calcd. for  $\text{C}_{17}\text{H}_{15}\text{ClO}$ : 270.0811, found 270.0818 .

#### Spectral data for 4-chloro-2-((4-chlorophenyl)(methoxy)methyl)-1-ethynylbenzene (**1l**)

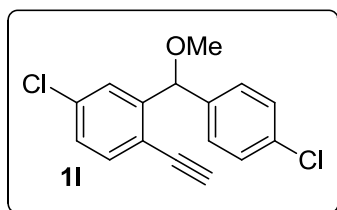

$^1\text{H}$  NMR (500 MHz,  $\text{CDCl}_3$ ):  $\delta$  7.60 (d,  $J = 2.0$  Hz, 1H), 7.46 (d,  $J = 8.0$  Hz, 1H), 7.43 (d,  $J = 8.5$  Hz, 2H), 7.35 (d,  $J = 8.5$  Hz, 2H), 7.25 (dd,  $J = 8.0, 2.0$  Hz, 1H), 5.81 (s,

1H), 3.46 (s, 1H), 3.44 (s, 3H); <sup>13</sup>C NMR (125 MHz, CDCl<sub>3</sub>): δ 146.0, 139.2, 135.5, 134.0, 133.4, 128.4, 128.2, 127.7, 126.2, 119.1, 83.4, 81.0, 80.8, 56.9. HRMS(EI) calcd. for C<sub>16</sub>H<sub>12</sub>Cl<sub>2</sub>O: 290.0265, found 290.0280.

**Spectral data for 6-chloro-2-methoxy-1-phenyl-1H-indene (2a)**

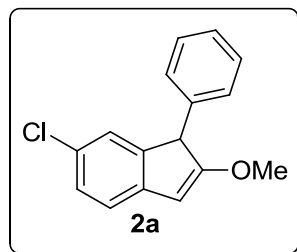

<sup>1</sup>H NMR (600 MHz, CDCl<sub>3</sub>): δ 7.27~7.30 (m, 2H), 7.23~7.26 (m, 1H), 7.05~7.14 (m, 4H), 6.98 (br, 1H), 5.69 (s, 1H), 4.45 (s, 1H), 3.75 (s, 3H); <sup>13</sup>C NMR (150 MHz, CDCl<sub>3</sub>): δ 170.1, 143.4, 142.3, 137.7, 128.8, 128.5, 128.1, 127.3, 127.2, 124.0, 119.8, 98.4, 57.7, 54.7. HRMS(EI) calcd. for C<sub>16</sub>H<sub>13</sub>ClO: 256.0655, found 256.0654.

**Spectral data for 6-fluoro-2-methoxy-1-phenyl-1H-indene (2b)**

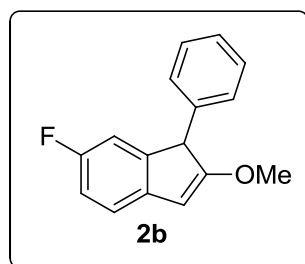

<sup>1</sup>H NMR (600 MHz, CDCl<sub>3</sub>): δ 7.28~7.31 (m, 2H), 7.26 (d, *J* = 7.2 Hz, 1H), 7.11 (d, *J* = 7.2 Hz, 2H), 7.06 (dd, *J* = 7.8, 4.8 Hz, 1H), 6.85~6.89 (m, 1H), 6.76 (d, *J* = 8.4 Hz, 1H), 5.69 (s, 1H), 4.46 (s, 1H), 3.75 (s, 3H); <sup>13</sup>C NMR (150 MHz, CDCl<sub>3</sub>): δ 169.4, 160.2 (d, *J* = 240.0 Hz), 143.5 (d, *J* = 7.5 Hz), 139.4, 138.0, 128.8, 128.1, 127.3, 119.3 (d, *J* = 9.0 Hz), 113.5 (d, *J* = 21.0 Hz), 111.5 (d, *J* = 24.0 Hz), 98.2, 57.6, 54.9. HRMS(EI) calcd. for C<sub>16</sub>H<sub>13</sub>FO: 240.0950, found 240.0945.

**Spectral data for 5-fluoro-2-methoxy-1-phenyl-1H-indene (2c)**

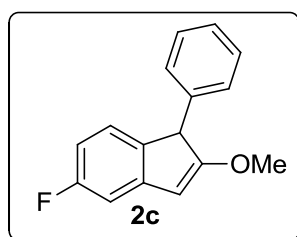

<sup>1</sup>H NMR (600 MHz, CDCl<sub>3</sub>): δ 7.26~7.29 (m, 2H), 7.21~7.24 (m, 1H), 7.08~7.09 (m,

2H), 6.92 (dd,  $J = 8.4, 5.4$  Hz, 1H), 6.85 (dd,  $J = 9.0, 2.4$  Hz, 1H), 6.60~6.64 (m, 1H), 5.68 (s, 1H), 4.42 (s, 1H), 3.75 (s, 3H);  $^{13}\text{C}$  NMR (150 MHz,  $\text{CDCl}_3$ ):  $\delta$  171.5, 162.8 (d,  $J = 241.5$  Hz), 145.8 (d,  $J = 9.0$  Hz), 138.3, 137.0, 128.7, 128.1, 127.2, 124.3 (d,  $J = 9.0$  Hz), 109.1 (d,  $J = 22.5$  Hz), 106.5 (d,  $J = 22.5$  Hz), 98.6, 57.7, 54.1. HRMS(EI) calcd. for  $\text{C}_{16}\text{H}_{13}\text{FO}$ : 240.0950, found 240.0944.

**Spectral data for 5-chloro-2-methoxy-1-phenyl-1H-indene (2d)**

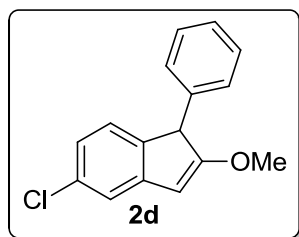

$^1\text{H}$  NMR (600 MHz,  $\text{CDCl}_3$ ):  $\delta$  7.26~7.29 (m, 2H), 7.22~7.25 (m, 1H), 7.12 (br, 1H), 7.07~7.08 (m, 2H), 6.91 (d,  $J = 1.2$  Hz, 2H), 5.67 (s, 1H), 4.43 (s, 1H), 3.75 (s, 3H);  $^{13}\text{C}$  NMR (150 MHz,  $\text{CDCl}_3$ ):  $\delta$  171.2, 145.7, 139.9, 138.0, 132.9, 128.8, 128.1, 127.2, 124.4, 122.8, 119.2, 98.3, 57.7, 54.3. HRMS(EI) calcd. for  $\text{C}_{16}\text{H}_{13}\text{ClO}$ : 256.0655, found 256.0656.

**Spectral data for 5-bromo-2-methoxy-1-phenyl-1H-indene (2e)**

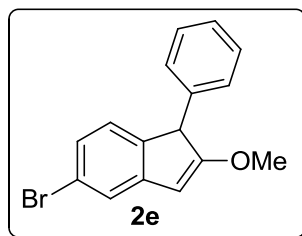

$^1\text{H}$  NMR (600 MHz,  $\text{CDCl}_3$ ):  $\delta$  7.21~7.29 (m, 4H), 7.06~7.08 (m, 3H), 6.86 (d,  $J = 7.8$  Hz, 1H), 5.66 (s, 1H), 4.40 (s, 1H), 3.75 (s, 3H);  $^{13}\text{C}$  NMR (150 MHz,  $\text{CDCl}_3$ ):  $\delta$  171.1, 146.0, 140.5, 137.8, 128.8, 128.1, 127.3, 125.7, 124.9, 122.1, 121.1, 98.2, 57.7, 54.4. HRMS(EI) calcd. for  $\text{C}_{16}\text{H}_{13}\text{BrO}$ : 300.0150, found 300.0155.

**Spectral data for 2-methoxy-1-phenyl-1H-indene (2f)**

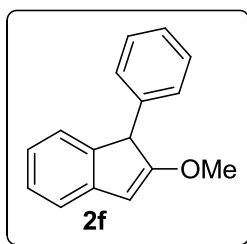

$^1\text{H}$  NMR (600 MHz,  $\text{CDCl}_3$ ):  $\delta$  7.25~7.27 (m, 2H), 7.19~7.22 (m, 1H), 7.15 (br, 2H), 7.09~7.11 (m, 2H), 7.01 (d,  $J = 7.2$  Hz, 1H), 6.93~6.96 (m, 1H), 5.71 (s, 1H), 4.46 (s, 1H), 3.74 (s, 3H);  $^{13}\text{C}$  NMR (150 MHz,  $\text{CDCl}_3$ ):  $\delta$  169.9, 143.8, 141.8, 138.6, 128.7, 128.2, 127.1, 127.0, 123.5, 123.0, 119.0, 99.0, 57.6, 54.7. HRMS(EI) calcd. for  $\text{C}_{16}\text{H}_{14}\text{O}$ : 222.1045, found 222.1044.

**Spectral data for 2-methoxy-6-methyl-1-phenyl-1H-indene (2g)**

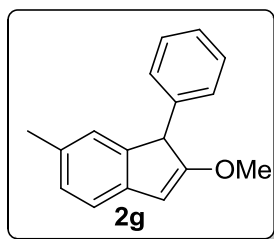

$^1\text{H}$  NMR (600 MHz,  $\text{CDCl}_3$ ):  $\delta$  7.26~7.29 (m, 2H), 7.21~7.24 (m, 1H), 7.10~7.12 (m, 2H), 7.05 (d,  $J = 7.2$  Hz, 1H), 6.98 (dt,  $J = 7.2, 0.6$  Hz, 1H), 6.85 (s, 1H), 5.70 (s, 1H), 4.44 (s, 1H), 3.74 (s, 3H);  $^{13}\text{C}$  NMR (150 MHz,  $\text{CDCl}_3$ ):  $\delta$  169.2, 142.1, 140.9, 138.9, 132.5, 128.7, 128.2, 127.6, 127.0, 124.4, 118.7, 98.8, 57.5, 54.7, 21.3. HRMS(ESI) calcd. for  $\text{C}_{17}\text{H}_{17}\text{O}^+$  ( $\text{M}+\text{H}$ ) $^+$  237.1274, found 237.1277.

**Spectral data for 6-(tert-butyl)-2-methoxy-1-phenyl-1H-indene (2h)**

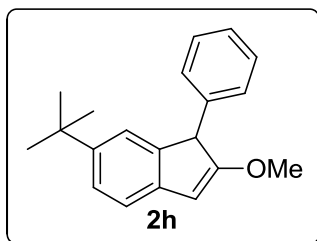

$^1\text{H}$  NMR (600 MHz,  $\text{CDCl}_3$ ):  $\delta$  7.27~7.29 (m, 2H), 7.20~7.24 (m, 2H), 7.13 (dd,  $J = 7.8, 1.2$  Hz, 2H), 7.09 (dd,  $J = 7.8, 0.6$  Hz, 1H), 7.07 (d,  $J = 1.2$  Hz, 1H), 5.68 (s, 1H), 4.46 (s, 1H), 3.73 (s, 3H), 1.23 (s, 9H);  $^{13}\text{C}$  NMR (150 MHz,  $\text{CDCl}_3$ ):  $\delta$  169.5, 146.1, 141.5, 141.1, 138.9, 128.6, 128.3, 126.9, 123.8, 120.8, 118.4, 98.5, 57.5, 54.9, 34.5, 31.6. HRMS(EI) calcd. for  $\text{C}_{20}\text{H}_{22}\text{O}$ : 278.1671, found 278.1671.

**Spectral data for 2-methoxy-5-methyl-1-phenyl-1H-indene (2i)**

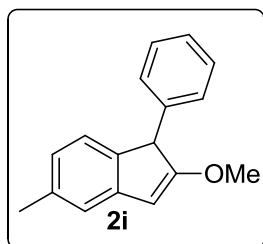

$^1\text{H}$  NMR (600 MHz,  $\text{CDCl}_3$ ):  $\delta$  7.27~7.30 (m, 2H), 7.22~7.25 (m, 1H), 7.12~7.13 (m, 1H), 7.01 (s, 1H), 6.92 (d,  $J = 7.8$  Hz, 1H), 6.79 (dd,  $J = 7.8, 1.2$  Hz, 1H), 5.70 (s, 1H), 4.46 (s, 1H), 3.76 (s, 3H), 2.34 (s, 3H);  $^{13}\text{C}$  NMR (150 MHz,  $\text{CDCl}_3$ ):  $\delta$  170.1, 143.9, 138.9 (C $\times$ 2), 136.7, 128.6, 128.1, 126.9, 123.6, 123.2, 119.9, 98.9, 57.5, 54.4, 21.6. HRMS(EI) calcd. for  $\text{C}_{17}\text{H}_{16}\text{O}$ : 236.1201, found 236.1200.

**Spectral data for 5-(*tert*-butyl)-2-methoxy-1-phenyl-1*H*-indene (2j)**

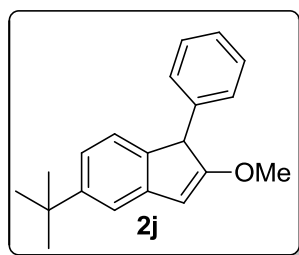

$^1\text{H}$  NMR (600 MHz,  $\text{CDCl}_3$ ):  $\delta$  7.26~7.28 (m, 2H), 7.20~7.23 (m, 2H), 7.12~7.13 (m, 2H), 6.94~6.99 (m, 2H), 5.72 (s, 1H), 4.44 (s, 1H), 3.75 (s, 3H), 1.31 (s, 9H);  $^{13}\text{C}$  NMR (150 MHz,  $\text{CDCl}_3$ ):  $\delta$  169.9, 150.2, 143.5, 138.9, 138.8, 128.6, 128.2, 126.9, 122.9, 119.9, 116.3, 99.2, 57.5, 54.4, 34.7, 31.6. HRMS(EI) calcd. for  $\text{C}_{20}\text{H}_{22}\text{O}$ : 278.1671, found 278.1673.

**Spectral data for 6-chloro-2-methoxy-1-(*p*-tolyl)-1*H*-indene (2k)**

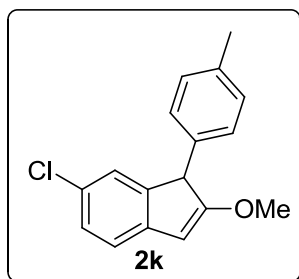

$^1\text{H}$  NMR (600 MHz,  $\text{CDCl}_3$ ):  $\delta$  7.14 (dd,  $J = 8.4, 1.8$  Hz, 1H), 7.12 (d,  $J = 7.8$  Hz, 2H), 7.07 (d,  $J = 8.4$  Hz, 1H), 6.99~7.00 (m, 3H), 5.69 (s, 1H), 4.43 (s, 1H), 3.76 (s, 3H), 2.33 (s, 3H);  $^{13}\text{C}$  NMR (150 MHz,  $\text{CDCl}_3$ ):  $\delta$  170.2, 143.6, 142.2, 136.9, 134.6, 129.5, 128.4, 128.0, 127.1, 123.9, 119.8, 98.2, 57.2, 54.4, 21.1. HRMS(EI) calcd. for  $\text{C}_{17}\text{H}_{15}\text{ClO}$ : 270.0811, found 270.0816.

**Spectral data for 6-chloro-1-(4-chlorophenyl)-2-methoxy-1*H*-indene (2l)**



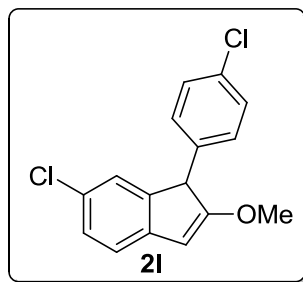

$^1\text{H}$  NMR (500 MHz,  $\text{CDCl}_3$ ):  $\delta$  7.25 (d,  $J = 8.5$  Hz, 2H), 7.14 (dd,  $J = 8.5, 1.5$  Hz, 1H), 7.05 (d,  $J = 8.5$  Hz, 1H), 7.01 (d,  $J = 8.5$  Hz, 2H), 6.95 (br, 1H), 5.68 (s, 1H), 4.41 (s, 1H), 3.74 (s, 3H);  $^{13}\text{C}$  NMR (125 MHz,  $\text{CDCl}_3$ ):  $\delta$  169.6, 142.9, 142.2, 136.3, 133.1, 129.5, 129.0, 128.6, 127.4, 123.9, 120.0, 98.5, 57.7, 54.0. HRMS(EI) calcd. for  $\text{C}_{16}\text{H}_{12}\text{Cl}_2\text{O}$ : 290.0265, found 290.0273.

**Spectral data for 5-chloro-2-methoxy-3-phenyl-1H-indene (2a')**

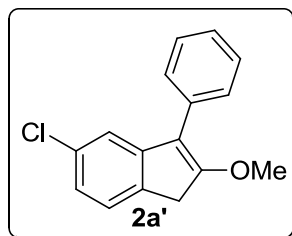

$^1\text{H}$  NMR (600 MHz,  $\text{CDCl}_3$ ):  $\delta$  7.51~7.53 (m, 2H), 7.41~7.44 (m, 2H), 7.28~7.31 (m, 1H), 7.22~7.25 (m, 2H), 7.03 (dd,  $J = 7.8, 1.8$  Hz, 1H), 3.82 (s, 3H), 3.55 (s, 2H);  $^{13}\text{C}$  NMR (150 MHz,  $\text{CDCl}_3$ ):  $\delta$  161.7, 147.1, 133.6, 133.1, 132.8, 128.7, 128.4, 126.9, 124.2, 122.5, 118.5, 116.4, 57.9, 34.8. HRMS(EI) calcd. for  $\text{C}_{16}\text{H}_{13}\text{ClO}$ : 256.0655, found 256.0648.

**Spectral data for 5-fluoro-2-methoxy-3-phenyl-1H-indene (2b')**

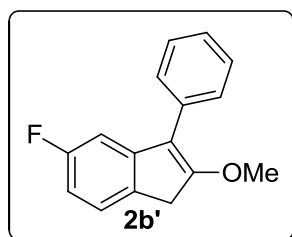

$^1\text{H}$  NMR (600 MHz,  $\text{CDCl}_3$ ):  $\delta$  7.52~7.54 (m, 2H), 7.41~7.43 (m, 2H), 7.23~7.30 (m, 2H), 7.00 (dd,  $J = 9.6, 2.4$  Hz, 1H), 6.72~6.76 (m, 1H), 3.83 (s, 3H), 3.55 (s, 2H);  $^{13}\text{C}$  NMR (150 MHz,  $\text{CDCl}_3$ ):  $\delta$  162.8 (d,  $J = 240.0$  Hz), 162.1, 147.3 (d,  $J = 9.0$  Hz), 133.3, 130.6, 128.6, 128.4, 126.8, 124.1 (d,  $J = 9.0$  Hz), 116.7, 109.0 (d,  $J = 22.5$  Hz), 105.9 (d,  $J = 24.0$  Hz), 57.8, 34.6. HRMS(EI) calcd. for  $\text{C}_{16}\text{H}_{13}\text{FO}$ : 240.0950, found

240.0955.

**Spectral data for 6-fluoro-2-methoxy-3-phenyl-1*H*-indene (2c')**

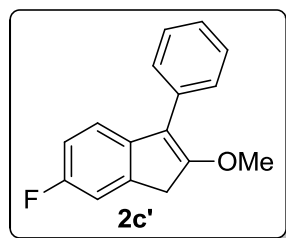

$^1\text{H}$  NMR (600 MHz,  $\text{CDCl}_3$ ):  $\delta$  7.54 (dt,  $J = 7.8, 1.8$  Hz, 2H), 7.40~7.42 (m, 2H), 7.26~7.29 (m, 1H), 7.20 (dd,  $J = 8.4, 4.8$  Hz, 1H), 7.07 (dt,  $J = 8.4, 1.2$  Hz, 1H), 6.91 (td,  $J = 9.0, 2.4$  Hz, 1H), 3.81 (s, 3H), 3.57 (s, 2H);  $^{13}\text{C}$  NMR (150 MHz,  $\text{CDCl}_3$ ):  $\delta$  160.1 (d,  $J = 238.5$  Hz), 159.5, 140.9, 137.2 (d,  $J = 7.5$  Hz), 133.6, 128.7, 128.3, 126.7, 118.8 (d,  $J = 7.5$  Hz), 116.4, 113.1 (d,  $J = 21.0$  Hz), 111.3 (d,  $J = 24.0$  Hz), 57.9, 35.2. HRMS(EI) calcd. for  $\text{C}_{16}\text{H}_{13}\text{FO}$ : 240.0950, found 240.0953.

**Spectral data for 6-chloro-2-methoxy-3-phenyl-1*H*-indene (2d')**

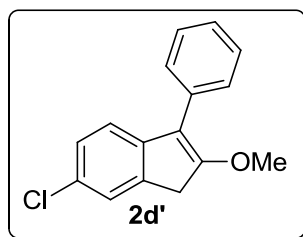

$^1\text{H}$  NMR (600 MHz,  $\text{CDCl}_3$ ):  $\delta$  7.52~7.54 (m, 2H), 7.42 (tt,  $J = 7.8, 1.2$  Hz, 2H), 7.31 (br, 1H), 7.27~7.30 (m, 1H), 7.17~7.22 (m, 2H), 3.82 (s, 3H), 3.57 (s, 2H);  $^{13}\text{C}$  NMR (150 MHz,  $\text{CDCl}_3$ ):  $\delta$  160.4, 143.7, 137.1, 133.3, 128.7, 128.4, 128.2, 126.8, 126.7, 123.7, 119.1, 116.4, 57.9, 35.0. HRMS(EI) calcd. for  $\text{C}_{16}\text{H}_{13}\text{ClO}$ : 256.0655, found 256.0652.

**Spectral data for 6-bromo-2-methoxy-3-phenyl-1*H*-indene (2e')**

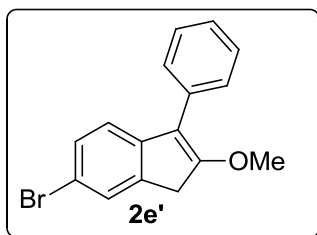

$^1\text{H}$  NMR (600 MHz,  $\text{CDCl}_3$ ):  $\delta$  7.52~7.53 (m, 2H), 7.45 (d,  $J = 0.6$  Hz, 1H), 7.41 (td,  $J = 7.8, 1.8$  Hz, 2H), 7.33 (dd,  $J = 7.8, 1.8$  Hz, 1H), 7.28 (tt,  $J = 7.2, 1.2$  Hz, 1H), 7.16

(d,  $J = 8.4$  Hz, 1H), 3.82 (s, 3H), 3.56 (s, 2H);  $^{13}\text{C}$  NMR (150 MHz,  $\text{CDCl}_3$ ):  $\delta$  160.4, 144.2, 137.4, 133.3, 129.6, 128.7, 128.4, 126.8, 126.5, 119.6, 116.4, 116.0, 57.9, 34.9. HRMS(EI) calcd. for  $\text{C}_{16}\text{H}_{13}\text{BrO}$ : 300.0150, found 300.0143.

**Spectral data for 2-methoxy-3-phenyl-1H-indene (2f')**

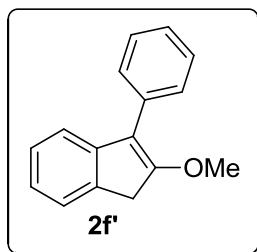

$^1\text{H}$  NMR (600 MHz,  $\text{CDCl}_3$ ):  $\delta$  7.57 (dd,  $J = 7.2, 1.2$  Hz, 2H), 7.41 (t,  $J = 7.8$  Hz, 2H), 7.35 (dd,  $J = 7.2, 0.6$  Hz, 1H), 7.32 (d,  $J = 7.8$  Hz, 1H), 7.28 (td,  $J = 7.2, 1.2$  Hz, 1H), 7.22 (t,  $J = 7.8$  Hz, 1H), 7.08 (td,  $J = 7.8, 1.2$  Hz, 1H), 3.83 (s, 3H), 3.59 (s, 2H);  $^{13}\text{C}$  NMR (150 MHz,  $\text{CDCl}_3$ ):  $\delta$  160.4, 145.2, 135.5, 133.8, 128.8, 128.3, 126.7, 126.6, 123.4, 122.7, 118.4, 116.9, 57.8, 35.1. HRMS(EI) calcd. for  $\text{C}_{16}\text{H}_{14}\text{O}$ : 222.1045, found 222.1047.

**Spectral data for 2-methoxy-5-methyl-3-phenyl-1H-indene (2g')**

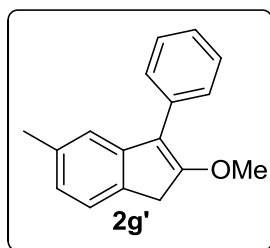

$^1\text{H}$  NMR (600 MHz,  $\text{CDCl}_3$ ):  $\delta$  7.56 (dd,  $J = 7.8, 1.2$  Hz, 2H), 7.41~7.43 (m, 2H), 7.28 (td,  $J = 7.2, 1.2$  Hz, 1H), 7.23 (d,  $J = 7.2$  Hz, 1H), 7.12 (s, 1H), 6.89 (d,  $J = 7.2$  Hz, 1H), 3.81 (s, 3H), 3.55 (s, 2H), 2.33 (s, 3H);  $^{13}\text{C}$  NMR (150 MHz,  $\text{CDCl}_3$ ):  $\delta$  160.7, 145.3, 136.3, 133.9, 132.5, 128.9, 128.3, 126.5, 123.4, 123.1, 119.2, 116.9, 57.8, 34.8, 21.7. HRMS(EI) calcd. for  $\text{C}_{17}\text{H}_{17}\text{O}$ : 236.1201, found 236.1205.

**Spectral data for 5-(tert-butyl)-2-methoxy-3-phenyl-1H-indene (2h')**

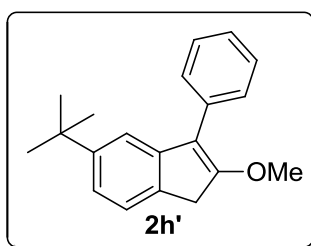

$^1\text{H}$  NMR (600 MHz,  $\text{CDCl}_3$ ):  $\delta$  7.57 (dd,  $J = 7.8, 1.2$  Hz, 2H), 7.42~7.45 (m, 2H), 7.37 (d,  $J = 1.8$  Hz, 1H), 7.27~7.30 (m, 2H), 7.13 (dd,  $J = 7.8, 1.8$  Hz, 1H), 3.81 (s, 3H), 3.55 (s, 2H), 1.30 (s, 9H);  $^{13}\text{C}$  NMR (150 MHz,  $\text{CDCl}_3$ ):  $\delta$  160.6., 149.9, 144.9, 133.9, 132.7, 128.8, 128.3, 126.5, 122.9, 119.7, 117.2, 115.5, 57.7, 34.8, 34.6, 31.6. HRMS(EI) calcd. for  $\text{C}_{20}\text{H}_{22}\text{O}$ : 278.1671, found 278.1669.

**Spectral data for 2-methoxy-6-methyl-3-phenyl-1*H*-indene (2i')**

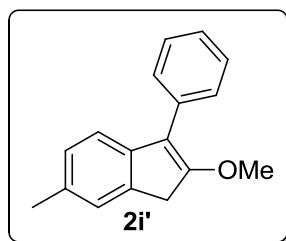

$^1\text{H}$  NMR (600 MHz,  $\text{CDCl}_3$ ):  $\delta$  7.57 (dd,  $J = 8.4, 1.2$  Hz, 2H), 7.39~7.42 (m, 2H), 7.25~7.28 (m, 1H), 7.21 (d,  $J = 7.2$  Hz, 1H), 7.18 (br, 1H), 7.03 (d,  $J = 7.8$  Hz, 1H), 3.81 (s, 3H), 3.55 (s, 2H), 2.35 (s, 3H);  $^{13}\text{C}$  NMR (150 MHz,  $\text{CDCl}_3$ ):  $\delta$  159.5, 142.2, 135.7, 133.9, 132.2, 128.7, 128.2, 127.1, 126.4, 124.3, 118.0, 116.7, 57.7, 34.9, 21.2. HRMS(EI) calcd. for  $\text{C}_{17}\text{H}_{16}\text{O}$ : 236.1201, found 236.1199.

**Spectral data for 6-(*tert*-butyl)-2-methoxy-3-phenyl-1*H*-indene (2j')**

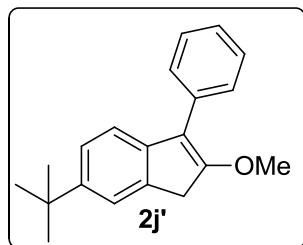

$^1\text{H}$  NMR (600 MHz,  $\text{CDCl}_3$ ):  $\delta$  7.56~7.58 (m, 2H), 7.39~7.42 (m, 3H), 7.25~7.28 (m, 3H), 3.81 (s, 3H), 3.58 (s, 2H), 1.33 (s, 9H);  $^{13}\text{C}$  NMR (150 MHz,  $\text{CDCl}_3$ ):  $\delta$  159.9, 145.9, 142.5, 135.5, 134.0, 128.7, 128.2, 126.5, 123.4, 120.7, 117.9, 116.8, 57.8, 35.2, 34.5, 31.6. HRMS(EI) calcd. for  $\text{C}_{20}\text{H}_{22}\text{O}$ : 278.1671, found 278.1664.

**Spectral data for 5-chloro-2-methoxy-3-(*p*-tolyl)-1*H*-indene (2k')**

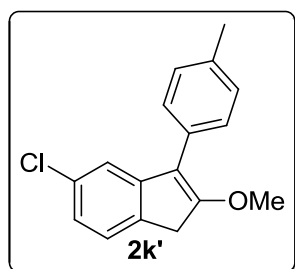

$^1\text{H}$  NMR (500 MHz,  $\text{CDCl}_3$ ):  $\delta$  7.41 (d,  $J = 8.0$  Hz, 2H), 7.21~7.24 (m, 4H), 7.01 (dd,  $J = 7.8, 1.9$  Hz, 1H), 3.81 (s, 3H), 3.52 (s, 2H), 2.37 (s, 3H);  $^{13}\text{C}$  NMR (125 MHz,  $\text{CDCl}_3$ ):  $\delta$  161.4, 147.3, 136.6, 133.6, 132.8, 130.1, 129.1, 128.6, 124.2, 122.4, 118.5, 116.3, 57.8, 34.7, 21.3. HRMS(EI) calcd. for  $\text{C}_{17}\text{H}_{15}\text{ClO}$ : 270.0811, found 270.0822.

**Spectral data for 5-chloro-3-(4-chlorophenyl)-2-methoxy-1H-indene (2l')**

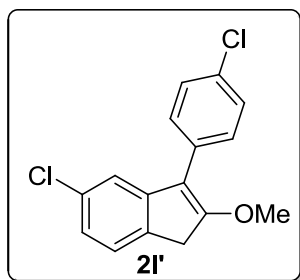

$^1\text{H}$  NMR (600 MHz,  $\text{CDCl}_3$ ):  $\delta$  7.47 (d,  $J = 8.4$  Hz, 2H), 7.39 (d,  $J = 8.4$  Hz, 2H), 7.23 (d,  $J = 7.8$  Hz, 1H), 7.22 (d,  $J = 1.8$  Hz, 1H), 7.04 (dd,  $J = 7.8, 1.8$  Hz, 1H), 3.84 (s, 3H), 3.55 (s, 2H);  $^{13}\text{C}$  NMR (150 MHz,  $\text{CDCl}_3$ ):  $\delta$  162.1, 146.6, 133.4, 132.9, 132.4, 131.6, 130.0, 128.6, 124.4, 122.7, 118.4, 115.3, 57.9, 34.7. HRMS(EI) calcd. for  $\text{C}_{16}\text{H}_{12}\text{Cl}_2\text{O}$ : 290.0265, found 290.0260.

**Spectral data for 6-(tert-butyl)-1-phenyl-1H-inden-2(3H)-one (3h)**

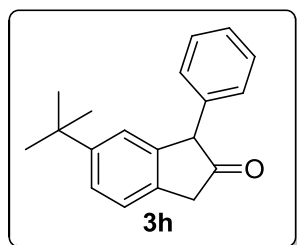

$^1\text{H}$  NMR (600 MHz,  $\text{CDCl}_3$ ):  $\delta$  7.38 (dd,  $J = 7.8, 1.8$  Hz, 1H), 7.30~7.33 (m, 3H), 7.25~7.27 (m, 1H), 7.21 (br, 1H), 7.11 (dd,  $J = 7.8, 1.2$  Hz, 2H), 4.65 (s, 1H), 3.61 (s, 2H), 1.28 (s, 9H);  $^{13}\text{C}$  NMR (150 MHz,  $\text{CDCl}_3$ ):  $\delta$  214.2, 151.2, 140.8, 138.2, 134.3, 128.7, 128.4, 127.2, 125.2, 124.4, 122.8, 60.0, 42.6, 34.8, 31.4. HRMS(EI) calcd. for  $\text{C}_{19}\text{H}_{20}\text{O}$ : 264.1514, found 264.1508.

**Spectral data for 6-chloro-1-(p-tolyl)-1H-inden-2(3H)-one (3k)**

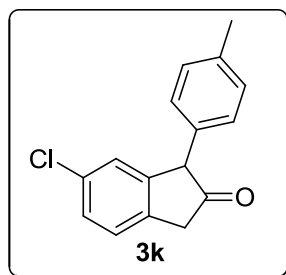

$^1\text{H}$  NMR (600 MHz,  $\text{CDCl}_3$ ):  $\delta$  7.29~7.30 (m, 2H), 7.15~7.16 (m, 1H), 7.13 (d,  $J$  = 7.8 Hz, 2H), 6.96 (d,  $J$  = 7.8 Hz, 2H), 4.60 (s, 1H), 3.60 (s, 2H), 2.31 (s, 3H);  $^{13}\text{C}$  NMR (150 MHz,  $\text{CDCl}_3$ ):  $\delta$  213.0, 143.4, 137.4, 135.5, 134.4, 133.6, 129.6, 128.3 (CH $\times$ 2), 126.1 (CH $\times$ 2), 59.5, 42.4, 21.1. HRMS(EI) calcd. for  $\text{C}_{16}\text{H}_{13}\text{ClO}$ : 256.0655, found 256.0648.

**Spectral data for 6-chloro-1-(4-chlorophenyl)-1H-inden-2(3H)-one (3l)**

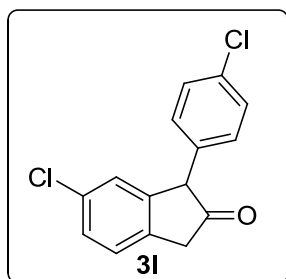

$^1\text{H}$  NMR (500 MHz,  $\text{CDCl}_3$ ):  $\delta$  7.31 (br, 2H), 7.29 (d,  $J$  = 8.5 Hz, 2H), 7.14 (br, 1H), 7.01 (d,  $J$  = 8.5 Hz, 2H), 4.61 (s, 1H), 3.61 (s, 2H);  $^{13}\text{C}$  NMR (125 MHz,  $\text{CDCl}_3$ ):  $\delta$  212.2, 142.4, 135.7, 135.5, 133.7, 133.6, 129.7, 129.1, 128.6, 126.2, 126.1, 59.0, 42.4. HRMS(EI) calcd. for  $\text{C}_{15}\text{H}_{10}\text{Cl}_2\text{O}$ : 276.0109, found 276.0099.

**Spectral data for methyl 2-(5-chloro-2-formylphenyl)-2-phenylacetate (5a)**

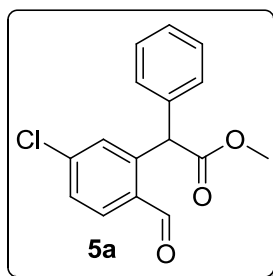

$^1\text{H}$  NMR (600 MHz,  $\text{CDCl}_3$ ):  $\delta$  10.05 (s, 1H), 7.75 (d,  $J$  = 8.4 Hz, 1H), 7.44 (dd,  $J$  = 7.8, 1.8 Hz, 1H), 7.35~7.38 (m, 2H), 7.30~7.33 (m, 1H), 7.23~7.24 (m, 2H), 7.15 (d,  $J$  = 1.8 Hz, 1H), 6.00 (s, 1H), 3.73 (s, 3H);  $^{13}\text{C}$  NMR (150 MHz,  $\text{CDCl}_3$ ):  $\delta$  192.0, 172.3, 141.9, 140.5, 136.8, 136.2, 132.1, 130.8, 129.1, 129.0, 128.0, 127.8, 52.5 (CH $_3$  $\times$ 1, CH $\times$ 1). HRMS(ESI) calcd. for  $\text{C}_{16}\text{H}_{13}\text{ClNaO}_3^+$  (M+Na) $^+$  311.0445, found 311.0446.

**Spectral data for methyl 2-(5-fluoro-2-formylphenyl)-2-phenylacetate (5b)**

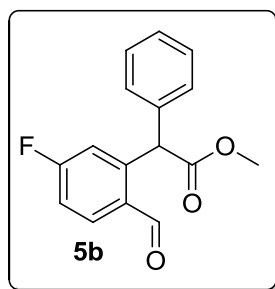

$^1\text{H}$  NMR (600 MHz,  $\text{CDCl}_3$ ):  $\delta$  10.04 (s, 1H), 7.83 (dd,  $J = 8.4, 6.0$  Hz, 1H), 7.30~7.38 (m, 3H), 7.24~7.25 (m, 2H), 7.11~7.15 (m, 1H), 6.87 (dd,  $J = 10.2, 2.4$  Hz, 1H), 6.03 (s, 1H), 3.73 (s, 3H);  $^{13}\text{C}$  NMR (150 MHz,  $\text{CDCl}_3$ ):  $\delta$  191.7, 172.3, 165.7 (d,  $J = 256.5$  Hz), 143.6 (d,  $J = 9.0$  Hz), 137.8 (d,  $J = 10.5$  Hz), 136.8, 130.4, 129.0 (CH $\times$ 2), 127.8, 118.2 (d,  $J = 24.0$  Hz), 114.7 (d,  $J = 21.0$  Hz), 52.7, 52.5. HRMS(ESI) calcd. for  $\text{C}_{16}\text{H}_{13}\text{FNaO}_3^+$  ( $\text{M}+\text{Na}$ ) $^+$  295.0741, found 295.0742.

**Spectral data for methyl 2-(4-fluoro-2-formylphenyl)-2-phenylacetate (5c)**

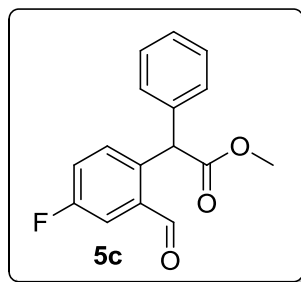

$^1\text{H}$  NMR (600 MHz,  $\text{CDCl}_3$ ):  $\delta$  10.07 (s, 1H), 7.52 (dt,  $J = 9.0, 1.8$  Hz, 1H), 7.34~7.36 (m, 2H), 7.28~7.31 (m, 1H), 7.21~7.23 (m, 2H), 7.19 (dd,  $J = 6.6, 1.8$  Hz, 2H), 5.95 (s, 1H), 3.73 (s, 3H);  $^{13}\text{C}$  NMR (150 MHz,  $\text{CDCl}_3$ ):  $\delta$  191.6, 172.7, 161.9 (d,  $J = 247.5$  Hz), 137.4, 135.9 (d,  $J = 3.0$  Hz), 135.3 (d,  $J = 6.0$  Hz), 132.5 (d,  $J = 7.5$  Hz), 128.9 (CH $\times$ 2), 127.7, 120.6 (d,  $J = 21.0$  Hz), 120.4 (d,  $J = 22.5$  Hz), 52.5, 52.2. HRMS(ESI) calcd. for  $\text{C}_{16}\text{H}_{13}\text{FNaO}_3^+$  ( $\text{M}+\text{Na}$ ) $^+$  295.0741, found 295.0745.

**Spectral data for methyl 2-(4-chloro-2-formylphenyl)-2-phenylacetate (5d)**

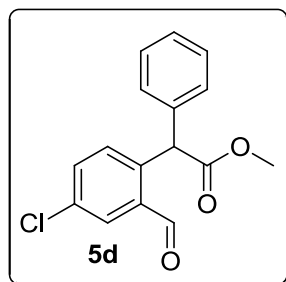

$^1\text{H}$  NMR (600 MHz,  $\text{CDCl}_3$ ):  $\delta$  10.05 (s, 1H), 7.78 (d,  $J = 1.8$  Hz, 1H), 7.45 (dd,  $J = 8.4, 2.4$  Hz, 1H), 7.34~7.36 (m, 2H), 7.29~7.31 (m, 1H), 7.21~7.22 (m, 2H), 7.13 (d,  $J = 8.4$  Hz, 1H), 5.95 (s, 1H), 3.73 (s, 3H);  $^{13}\text{C}$  NMR (150 MHz,  $\text{CDCl}_3$ ):  $\delta$  191.8, 172.5, 138.4, 137.1, 135.0, 134.2, 134.0, 133.6, 132.0, 129.0, 128.9, 127.7, 52.5, 52.3. HRMS(ESI) calcd. for  $\text{C}_{16}\text{H}_{13}\text{ClNaO}_3^+$  ( $\text{M}+\text{Na}$ ) $^+$  311.0445, found 311.0445.

**Spectral data for methyl 2-(4-bromo-2-formylphenyl)-2-phenylacetate (5e)**

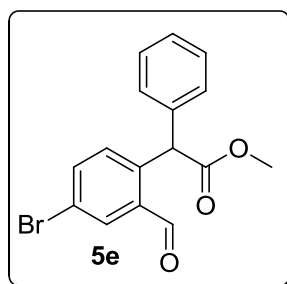

$^1\text{H}$  NMR (600 MHz,  $\text{CDCl}_3$ ):  $\delta$  10.04 (s, 1H), 7.93 (d,  $J = 2.4$  Hz, 1H), 7.60 (dd,  $J = 8.4, 2.4$  Hz, 1H), 7.34~7.36 (m, 2H), 7.29~7.31 (m, 1H), 7.20~7.22 (m, 2H), 7.06 (d,  $J = 7.8$  Hz, 1H), 5.94 (s, 1H), 3.73 (s, 3H);  $^{13}\text{C}$  NMR (150 MHz,  $\text{CDCl}_3$ ):  $\delta$  191.7, 172.4, 138.9, 137.2, 137.1, 136.6, 135.2, 132.3, 129.0 (CH $\times$ 2), 127.7, 121.8, 52.5, 52.4. HRMS(ESI) calcd. for  $\text{C}_{16}\text{H}_{13}\text{BrNaO}_3^+$  ( $\text{M}+\text{Na}$ ) $^+$  354.9940, found 354.9944.

**Spectral data for methyl 2-(2-formylphenyl)-2-phenylacetate (5f)**

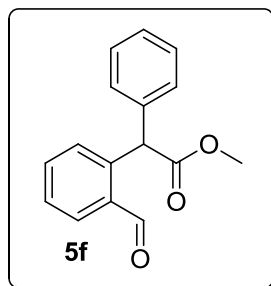

$^1\text{H}$  NMR (600 MHz,  $\text{CDCl}_3$ ):  $\delta$  10.09 (s, 1H), 7.80 (dd,  $J = 7.2, 1.8$  Hz, 1H), 7.44~7.50 (m, 2H), 7.31~7.34 (m, 2H), 7.27 (tt,  $J = 7.2, 1.2$  Hz, 1H), 7.22~7.24 (m, 2H), 7.18 (d,  $J = 7.2$  Hz, 1H), 6.04 (s, 1H), 3.71 (s, 3H);  $^{13}\text{C}$  NMR (150 MHz,  $\text{CDCl}_3$ ):  $\delta$  193.3, 172.9, 140.0, 137.6, 135.1, 133.8, 133.7, 130.4, 129.1, 128.8, 127.7, 127.5, 52.7, 52.4. HRMS(ESI) calcd. for  $\text{C}_{16}\text{H}_{14}\text{NaO}_3^+$  ( $\text{M}+\text{Na}$ ) $^+$  277.0835, found 277.0839.

**Spectral data for methyl 2-(2-formyl-5-methylphenyl)-2-phenylacetate (5g)**



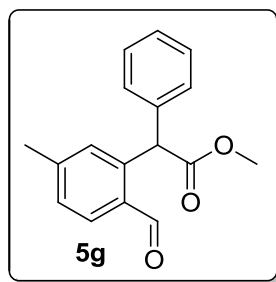

$^1\text{H}$  NMR (600 MHz,  $\text{CDCl}_3$ ):  $\delta$  10.04 (s, 1H), 7.69 (d,  $J = 7.8$  Hz, 1H), 7.34 (t,  $J = 7.8$  Hz, 2H), 7.24~7.29 (m, 4H), 7.00 (s, 1H), 6.07 (s, 1H), 3.73 (s, 3H), 2.33 (s, 3H);  $^{13}\text{C}$  NMR (150 MHz,  $\text{CDCl}_3$ ):  $\delta$  192.9, 173.0, 144.9, 139.9, 137.6, 135.5, 131.4, 131.1, 129.1, 128.7, 128.4, 127.4, 52.5, 52.3, 22.0. HRMS(ESI) calcd. for  $\text{C}_{17}\text{H}_{16}\text{NaO}_3^+$  ( $\text{M}+\text{Na}$ ) $^+$  291.0992, found 291.0991.

**Spectral data for methyl 2-(5-(*tert*-butyl)-2-formylphenyl)-2-phenylacetate (5h)**

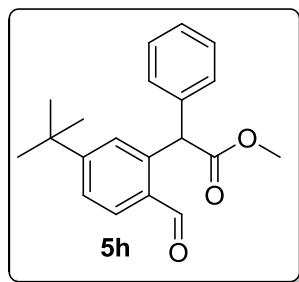

$^1\text{H}$  NMR (600 MHz,  $\text{CDCl}_3$ ):  $\delta$  10.04 (s, 1H), 7.73 (d,  $J = 7.8$  Hz, 1H), 7.46 (dd,  $J = 7.8, 1.8$  Hz, 1H), 7.33~7.35 (m, 2H), 7.25~7.29 (m, 3H), 7.23 (d,  $J = 1.8$  Hz, 1H), 6.05 (s, 1H), 3.73 (s, 3H), 1.22 (s, 9H);  $^{13}\text{C}$  NMR (150 MHz,  $\text{CDCl}_3$ ):  $\delta$  192.9, 173.0, 157.6, 139.6, 137.8, 135.3, 131.3, 129.1, 128.7, 127.8, 127.4, 124.5, 52.9, 52.3, 35.3, 30.9. HRMS(ESI) calcd. for  $\text{C}_{20}\text{H}_{22}\text{NaO}_3^+$  ( $\text{M}+\text{Na}$ ) $^+$  333.1461, found 333.1465.

**Spectral data for methyl 2-(2-formyl-4-methylphenyl)-2-phenylacetate (5i)**

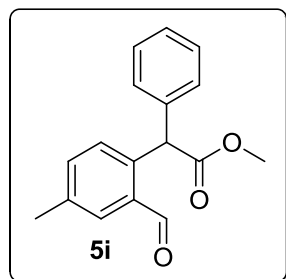

$^1\text{H}$  NMR (600 MHz,  $\text{CDCl}_3$ ):  $\delta$  10.06 (s, 1H), 7.61 (br, 1H), 7.26~7.34 (m, 4H), 7.24 (d,  $J = 7.2$  Hz, 2H), 7.08 (d,  $J = 7.8$  Hz, 1H), 6.01 (s, 1H), 3.72 (s, 3H), 2.40 (s, 3H);  $^{13}\text{C}$  NMR (150 MHz,  $\text{CDCl}_3$ ):  $\delta$  193.5, 173.0, 137.8, 137.6, 137.1, 135.7, 134.5, 133.5,

130.3, 129.0, 128.8, 127.4, 52.4, 52.3, 20.7. HRMS(ESI) calcd. for  $C_{17}H_{16}NaO_3^+$  ( $M+Na$ )<sup>+</sup> 291.0992, found 291.0993.

**Spectral data for methyl 2-(4-(*tert*-butyl)-2-formylphenyl)-2-phenylacetate (5j)**

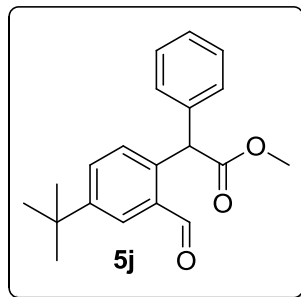

<sup>1</sup>H NMR (600 MHz, CDCl<sub>3</sub>): δ 10.10 (s, 1H), 7.81 (d, *J* = 2.4 Hz, 1H), 7.51 (dd, *J* = 7.8, 2.4 Hz, 1H), 7.33~7.35 (m, 2H), 7.27~7.30 (m, 1H), 7.24~7.26 (m, 2H), 7.09 (d, *J* = 8.4 Hz, 1H), 6.00 (s, 1H), 3.73 (s, 3H), 1.32 (s, 9H); <sup>13</sup>C NMR (150 MHz, CDCl<sub>3</sub>): δ 193.8, 173.1, 150.8, 137.8, 137.1, 133.3, 132.3, 130.9, 130.2, 129.1, 128.8, 127.4, 52.4, 52.3, 34.5, 31.1. HRMS(ESI) calcd. for  $C_{20}H_{22}NaO_3^+$  ( $M+Na$ )<sup>+</sup> 333.1461, found 333.1463.

**Spectral data for methyl 2-(5-chloro-2-formylphenyl)-2-(*p*-tolyl)acetate (5k)**

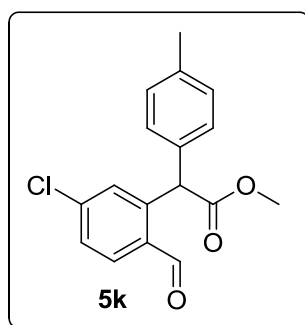

<sup>1</sup>H NMR (600 MHz, CDCl<sub>3</sub>): δ 10.05 (s, 1H), 7.74 (d, *J* = 8.4 Hz, 1H), 7.43 (dd, *J* = 8.4, 1.8 Hz, 1H), 7.16~7.18 (m, 3H), 7.12 (d, *J* = 7.8 Hz, 2H), 5.94 (s, 1H), 3.72 (s, 3H), 2.34 (s, 3H); <sup>13</sup>C NMR (150 MHz, CDCl<sub>3</sub>): δ 192.0, 172.5, 142.1, 140.5, 137.6, 136.0, 133.7, 132.1, 130.7, 129.8, 128.9, 127.9, 52.5, 52.2, 21.1. HRMS(ESI) calcd. for  $C_{17}H_{16}ClO_3^+$  ( $M+H$ )<sup>+</sup> 303.0782, found 303.0783.

**Spectral data for methyl 2-(5-chloro-2-formylphenyl)-2-(4-chlorophenyl)acetate (5l)**

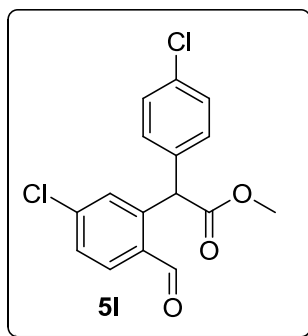

$^1\text{H}$  NMR (600 MHz,  $\text{CDCl}_3$ ):  $\delta$  10.02 (s, 1H), 7.74 (d,  $J = 7.8$  Hz, 1H), 7.47 (dd,  $J = 7.8, 1.8$  Hz, 1H), 7.33 (d,  $J = 8.4$  Hz, 2H), 7.18 (d,  $J = 8.4$  Hz, 2H), 7.17 (d,  $J = 1.8$  Hz, 1H), 6.02 (s, 1H), 3.73 (s, 3H);  $^{13}\text{C}$  NMR (150 MHz,  $\text{CDCl}_3$ ):  $\delta$  192.0, 172.0, 141.3, 140.6, 136.6, 135.3, 133.9, 132.0, 130.6, 130.4, 129.2, 128.2, 52.6, 51.7. HRMS(ESI) calcd. for  $\text{C}_{16}\text{H}_{13}\text{Cl}_2\text{O}_3^+$  ( $\text{M}+\text{H}$ ) $^+$  323.0236, found 323.0235.

**Spectral data for methyl 2-(2-(benzoyl)-4-chlorophenyl)acetate (6a)**

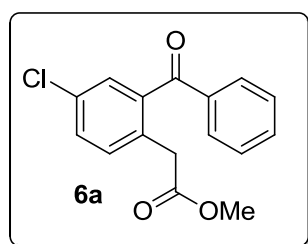

$^1\text{H}$  NMR (600 MHz,  $\text{CDCl}_3$ ):  $\delta$  7.79 (dd,  $J = 8.4, 1.8$  Hz, 2H), 7.58~7.61 (m, 1H), 7.45~7.48 (m, 2H), 7.43 (dd,  $J = 8.4, 2.4$  Hz, 1H), 7.35 (d,  $J = 2.4$  Hz, 1H), 7.29 (d,  $J = 8.4$  Hz, 1H), 3.82 (s, 2H), 3.53 (s, 3H);  $^{13}\text{C}$  NMR (150 MHz,  $\text{CDCl}_3$ ):  $\delta$  196.5, 171.2, 139.9, 137.0, 133.4, 133.1, 132.7, 132.2, 130.8, 130.3, 129.6, 128.5, 52.0, 38.0. HRMS(ESI) calcd. for  $\text{C}_{16}\text{H}_{14}\text{ClO}_3^+$  ( $\text{M}+\text{H}$ ) $^+$  289.0626, found 289.0627.

**Spectral data for methyl 2-(2-(benzoyl)-4-fluorophenyl)acetate (6b)**

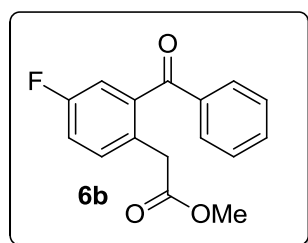

$^1\text{H}$  NMR (600 MHz,  $\text{CDCl}_3$ ):  $\delta$  7.78~7.80 (m, 2H), 7.57~7.60 (m, 1H), 7.45~7.47 (m, 2H), 7.32 (dd,  $J = 8.4, 5.4$  Hz, 1H), 7.16 (td,  $J = 8.4, 3.0$  Hz, 1H), 7.08 (dd,  $J = 8.4, 3.0$  Hz, 1H), 3.82 (s, 2H), 3.53 (s, 3H);  $^{13}\text{C}$  NMR (150 MHz,  $\text{CDCl}_3$ ):  $\delta$  196.6, 171.4, 160.9 (d,  $J = 247.5$  Hz), 140.0 (d,  $J = 6.0$  Hz), 137.0, 133.4 (d,  $J = 7.5$  Hz), 133.3,

130.3, 129.6, 128.5, 117.7 (d,  $J = 21.0$  Hz), 116.8 (d,  $J = 24.0$  Hz), 51.9, 37.8.  
HRMS(ESI) calcd. for  $C_{16}H_{13}FNaO_3^+$  ( $M+Na$ ) $^+$  295.0741, found, 295.0740.

**Spectral data for methyl 2-(2-benzoyl-5-fluorophenyl)acetate (6c)**

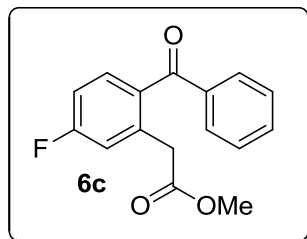

$^1H$  NMR (600 MHz,  $CDCl_3$ ):  $\delta$  7.75~7.77 (m, 2H), 7.56~7.59 (m, 1H), 7.45 (t,  $J = 7.8$  Hz, 2H), 7.40 (dd,  $J = 8.4, 6.0$  Hz, 1H), 7.07 (dd,  $J = 9.0, 3.0$  Hz, 1H), 7.01 (td,  $J = 8.4, 3.0$  Hz, 1H), 3.89 (s, 2H), 3.57 (s, 3H);  $^{13}C$  NMR (150 MHz,  $CDCl_3$ ):  $\delta$  196.9, 171.1, 163.7 (d,  $J = 252.0$  Hz), 137.8, 137.4 (d,  $J = 7.5$  Hz), 134.3, 133.0, 132.6 (d,  $J = 9.0$  Hz), 130.2, 128.4, 119.0 (d,  $J = 22.5$  Hz), 113.4 (d,  $J = 21.0$  Hz), 52.0, 38.7.  
HRMS(ESI) calcd. for  $C_{16}H_{13}FNaO_3^+$  ( $M+Na$ ) $^+$  295.0741, found 295.0743.

**Spectral data for methyl 2-(2-benzoyl-5-chlorophenyl)acetate (6d)**

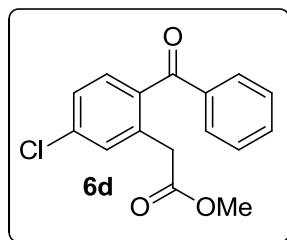

$^1H$  NMR (600 MHz,  $CDCl_3$ ):  $\delta$  7.76~7.77 (m, 2H), 7.56~7.59 (m, 1H), 7.44~7.46(m, 2H), 7.29~7.35 (m, 3H), 3.86 (s, 2H), 3.56 (s, 3H);  $^{13}C$  NMR (150 MHz,  $CDCl_3$ ):  $\delta$  197.0, 171.0, 137.5, 136.9, 136.6, 136.1, 133.1, 131.9, 131.4, 130.3, 128.4, 126.7, 52.0, 38.4. HRMS(ESI) calcd. for  $C_{16}H_{13}ClNaO_3^+$  ( $M+Na$ ) $^+$  311.0445, found 311.0448.

**Spectral data for methyl 2-(2-benzoyl-5-bromophenyl)acetate (6e)**

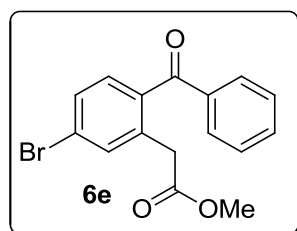

$^1H$  NMR (600 MHz,  $CDCl_3$ ):  $\delta$  7.76 (dd,  $J = 8.4, 1.2$  Hz, 2H), 7.56~7.59 (m, 1H),

7.51 (d,  $J = 1.8$  Hz, 1H), 7.44~7.47 (m, 3H), 7.26 (d,  $J = 8.4$  Hz, 1H), 3.85 (s, 2H), 3.55 (s, 3H);  $^{13}\text{C}$  NMR (150 MHz,  $\text{CDCl}_3$ ):  $\delta$  197.1, 171.0, 137.4, 137.1, 136.1, 134.8, 133.2, 131.5, 130.3, 129.7, 128.4, 125.3, 52.0, 38.3. HRMS(ESI) calcd. for  $\text{C}_{16}\text{H}_{13}\text{BrNaO}_3^+$  ( $\text{M}+\text{Na}$ ) $^+$  354.9940, found 354.9940.

**Spectral data for methyl 2-(2-benzoylphenyl)acetate (6f)**

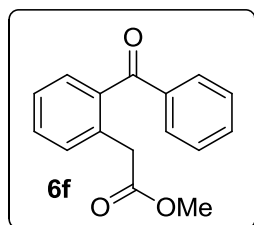

$^1\text{H}$  NMR (600 MHz,  $\text{CDCl}_3$ ):  $\delta$  7.78~7.80 (m, 2H), 7.55~7.58 (m, 1H), 7.43~7.47 (m, 3H), 7.31~7.39 (m, 3H), 3.88 (s, 2H), 3.54 (s, 3H);  $^{13}\text{C}$  NMR (150 MHz,  $\text{CDCl}_3$ ):  $\delta$  198.0, 171.6, 138.3, 137.8, 133.9, 132.9, 131.8, 130.9, 130.3, 130.0, 128.3, 126.5, 51.9, 38.7. HRMS(ESI) calcd. for  $\text{C}_{16}\text{H}_{14}\text{NaO}_3^+$  ( $\text{M}+\text{Na}$ ) $^+$  277.0835, found, 277.0841.

**Spectral data for methyl 2-(2-benzoyl-4-methylphenyl)acetate (6g)**

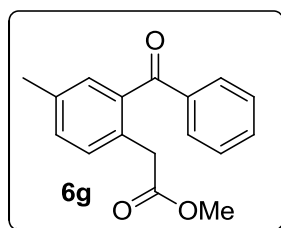

$^1\text{H}$  NMR (600 MHz,  $\text{CDCl}_3$ ):  $\delta$  7.79 (dd,  $J = 8.4, 1.2$  Hz, 2H), 7.55~7.58 (m, 1H), 7.43~7.46 (m, 2H), 7.22~7.27 (m, 2H), 7.18 (s, 1H), 3.81 (s, 2H), 3.53 (s, 3H), 2.33 (s, 3H);  $^{13}\text{C}$  NMR (150 MHz,  $\text{CDCl}_3$ ):  $\delta$  198.2, 171.8, 138.2, 137.9, 136.4, 132.9, 131.6 (CH $\times$ 2), 130.8, 130.5, 130.3, 128.3, 51.8, 38.3, 21.0. HRMS(ESI) calcd. for  $\text{C}_{17}\text{H}_{17}\text{O}_3^+$  ( $\text{M}+\text{H}$ ) $^+$  269.1172, found 269.1175.

**Spectral data for methyl 2-(2-benzoyl-4-(tert-butyl)phenyl)acetate (6h)**

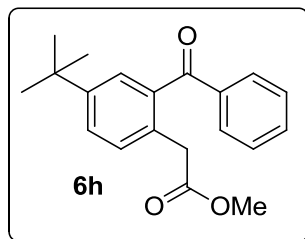

$^1\text{H}$  NMR (600 MHz,  $\text{CDCl}_3$ ):  $\delta$  7.79~7.81 (m, 2H), 7.56~7.58 (m, 1H), 7.43~7.48 (m,

3H), 7.38 (d,  $J = 2.4$  Hz, 1H), 7.27 (d,  $J = 7.8$  Hz, 1H);  $^{13}\text{C}$  NMR (150 MHz,  $\text{CDCl}_3$ ):  $\delta$  198.4, 171.9, 149.5, 137.8 (C $\times$ 2), 132.9, 131.4, 130.8, 130.4, 128.3, 127.8, 127.2, 51.8, 38.2, 34.5, 31.1. HRMS(ESI) calcd. for  $\text{C}_{20}\text{H}_{22}\text{NaO}_3^+$  ( $\text{M}+\text{Na}$ ) $^+$  333.1461, found 333.1463.

**Spectral data for methyl 2-(2-benzoyl-5-methylphenyl)acetate (6i)**

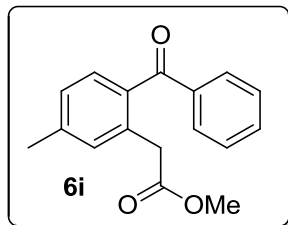

$^1\text{H}$  NMR (500 MHz,  $\text{CDCl}_3$ ):  $\delta$  7.77 (d,  $J = 7.0$  Hz, 2H), 7.55 (t,  $J = 7.5$  Hz, 1H), 7.41~7.45 (m, 2H), 7.29 (d,  $J = 8.0$  Hz, 1H), 7.15 (s, 1H), 7.11 (d,  $J = 8.0$  Hz, 1H), 3.86 (s, 2H), 3.55 (s, 3H), 2.39 (s, 3H);  $^{13}\text{C}$  NMR (125 MHz,  $\text{CDCl}_3$ ):  $\delta$  198.0, 171.9, 141.5, 138.2, 135.3, 134.2, 132.7 (CH $\times$ 2), 130.7, 130.3, 128.2, 127.1, 51.9, 38.8, 21.4. HRMS(ESI) calcd. for  $\text{C}_{17}\text{H}_{16}\text{NaO}_3^+$  ( $\text{M}+\text{Na}$ ) $^+$  291.0992, found 291.0990.

**Spectral data for methyl 2-(2-benzoyl-5-(*tert*-butyl)phenyl)acetate (6j)**

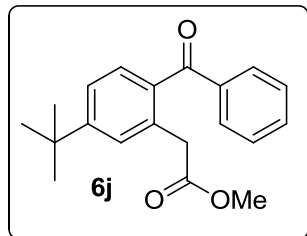

$^1\text{H}$  NMR (600 MHz,  $\text{CDCl}_3$ ):  $\delta$  7.79 (dd,  $J = 8.4, 1.2$  Hz, 2H), 7.54~7.57 (m, 1H), 7.42~7.45 (m, 2H), 7.30~7.34 (m, 3H), 3.92 (s, 2H), 3.55 (s, 3H), 1.34 (s, 9H);  $^{13}\text{C}$  NMR (150 MHz,  $\text{CDCl}_3$ ):  $\delta$  198.0, 171.9, 154.4, 138.2, 135.3, 133.9, 132.6, 130.5, 130.3, 129.1, 128.2, 123.4, 51.8, 39.1, 34.9, 31.1. HRMS(ESI) calcd. for  $\text{C}_{20}\text{H}_{23}\text{O}_3^+$  ( $\text{M}+\text{H}$ ) $^+$  311.1642, found 311.1644.

**Spectral data for methyl 2-(4-chloro-2-(4-methylbenzoyl)phenyl)acetate (6k)**

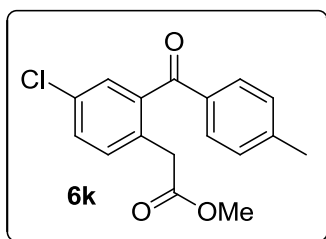

$^1\text{H}$  NMR (500 MHz,  $\text{CDCl}_3$ ):  $\delta$  7.69 (d,  $J = 8.5$  Hz, 2H), 7.42 (dd,  $J = 8.0, 2.0$  Hz, 1H), 7.34 (d,  $J = 2.0$  Hz, 1H), 7.25~7.29 (m, 3H), 3.79 (s, 2H), 3.53 (s, 3H), 2.42 (s, 3H);  $^{13}\text{C}$  NMR (125 MHz,  $\text{CDCl}_3$ ):  $\delta$  196.2, 171.2, 144.4, 140.1, 134.3, 132.9, 132.6, 132.0, 130.5 (CH $\times$ 2), 129.4, 129.2, 51.9, 37.9, 21.7. HRMS(ESI) calcd. for  $\text{C}_{17}\text{H}_{16}\text{ClO}_3^+$  (M+H) $^+$  303.0782, found 303.0784 .

**Spectral data for methyl 2-(4-chloro-2-(4-chlorobenzoyl)phenyl)acetate (6l)**

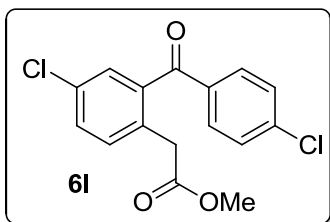

$^1\text{H}$  NMR (500 MHz,  $\text{CDCl}_3$ ):  $\delta$  7.74 (d,  $J = 8.5$  Hz, 2H), 7.43~7.45 (m, 3H), 7.31 (d,  $J = 2.0$  Hz, 1H), 7.28 (d,  $J = 8.5$  Hz, 1H), 3.83 (s, 2H), 3.54 (s, 3H);  $^{13}\text{C}$  NMR (125 MHz,  $\text{CDCl}_3$ ):  $\delta$  195.3, 171.1, 139.9, 139.4, 135.3, 133.1, 132.7, 132.2, 131.6, 130.9, 129.4, 128.8, 52.0, 37.9. HRMS(ESI) calcd. for  $\text{C}_{16}\text{H}_{13}\text{Cl}_2\text{O}_3^+$  (M+H) $^+$  323.0236, found 323.0237.

Current Data Parameters  
 NAME 2013-12-10  
 EXPNO 1  
 PROCNO 1

F2 - Acquisition Parameters  
 Date\_ 20131211  
 Time 7.18  
 INSTRUM spect  
 PROBHD 5 mm QNP 1H/1  
 PULPROG zg  
 TD 32768  
 SOLVENT CDC13  
 NS 16  
 DS 0  
 SWH 8382.222 Hz  
 FIDRES 0.255805 Hz  
 AQ 1.9546632 sec  
 RG 32  
 DW 59.650 usec  
 DE 6.50 usec  
 TE 295.3 K  
 D1 2.0000000 sec  
 MCREST 0 sec  
 MCWRK 0.01500000 sec

----- CHANNEL f1 -----  
 NUC1 1H  
 P1 10.00 usec  
 PL1 0 dB  
 SFO1 598.7029935 MHz

F2 - Processing parameters  
 SI 32768  
 SF 598.7000239 MHz  
 WDW no  
 SSB 0  
 LB 0 Hz  
 GB 0  
 PC 1.00

7.688  
 7.685  
 7.552  
 7.550  
 7.538  
 7.537  
 7.522  
 7.508  
 7.402  
 7.399  
 7.390  
 7.379  
 7.377  
 7.330  
 7.327  
 7.317  
 7.313  
 7.303

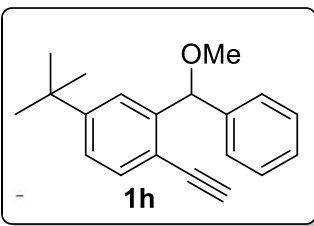

5.924

3.486  
 3.360

1.382

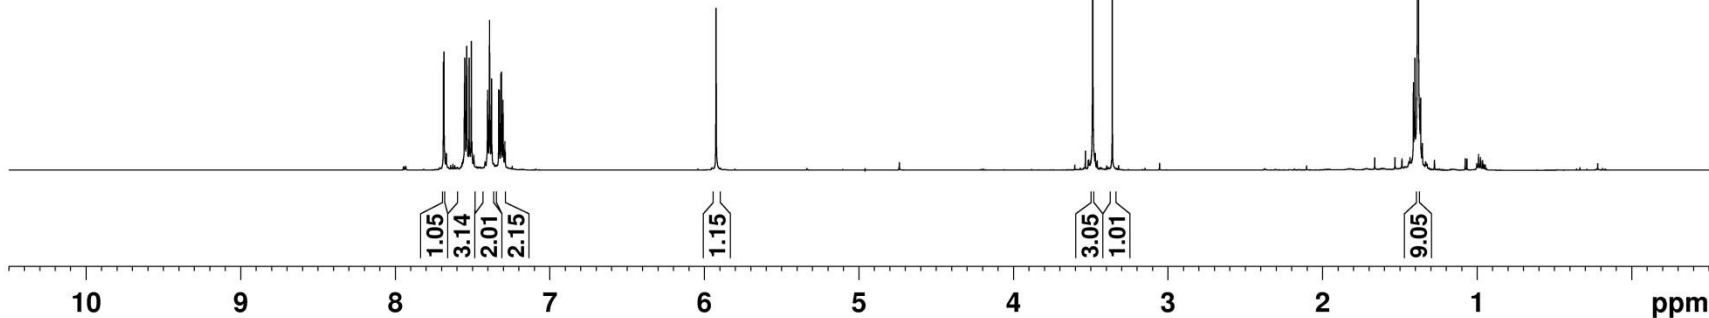



Current Data Parameters  
NAME 2013-12-10  
EXPNO 2  
PROCNO 1

F2 - Acquisition Parameters  
Date\_ 20131211  
Time 7.24  
INSTRUM spect  
PROBHD 5 mm QNP 1H/1  
PULPROG zgpg  
TD 32768  
SOLVENT CDC13  
NS 100  
DS 0  
SWH 45045.047 Hz  
FIDRES 1.374666 Hz  
AQ 0.3637748 sec  
RG 2048  
DW 11.100 usec  
DE 6.50 usec  
TE 296.8 K  
D1 3.5000000 sec

d11 0.0300000 sec  
DELTA 3.4000010 sec  
MCREST 0 sec  
MCWRK 0.01500000 sec

===== CHANNEL f1 =====  
NUC1 13C  
P1 4.80 usec  
PL1 0 dB  
SFO1 150.5597948 MHz

===== CHANNEL f2 =====  
CPDPRG2 waltz16  
NUC2 1H  
PCPD2 92.00 usec  
PL2 120.00 dB  
PL12 9.00 dB  
PL13 14.00 dB  
SFO2 598.7029935 MHz

F2 - Processing parameters  
SI 65536  
SF 150.5432686 MHz  
WDW EM  
SSB 0  
LB 3.00 Hz  
GB 0  
PC 0.50

152.49  
143.86  
141.54  
132.53  
128.14  
127.28  
126.91  
124.21  
122.94  
118.01  
82.44  
82.06  
81.43  
77.21  
77.00  
76.78  
56.94  
34.83  
31.05

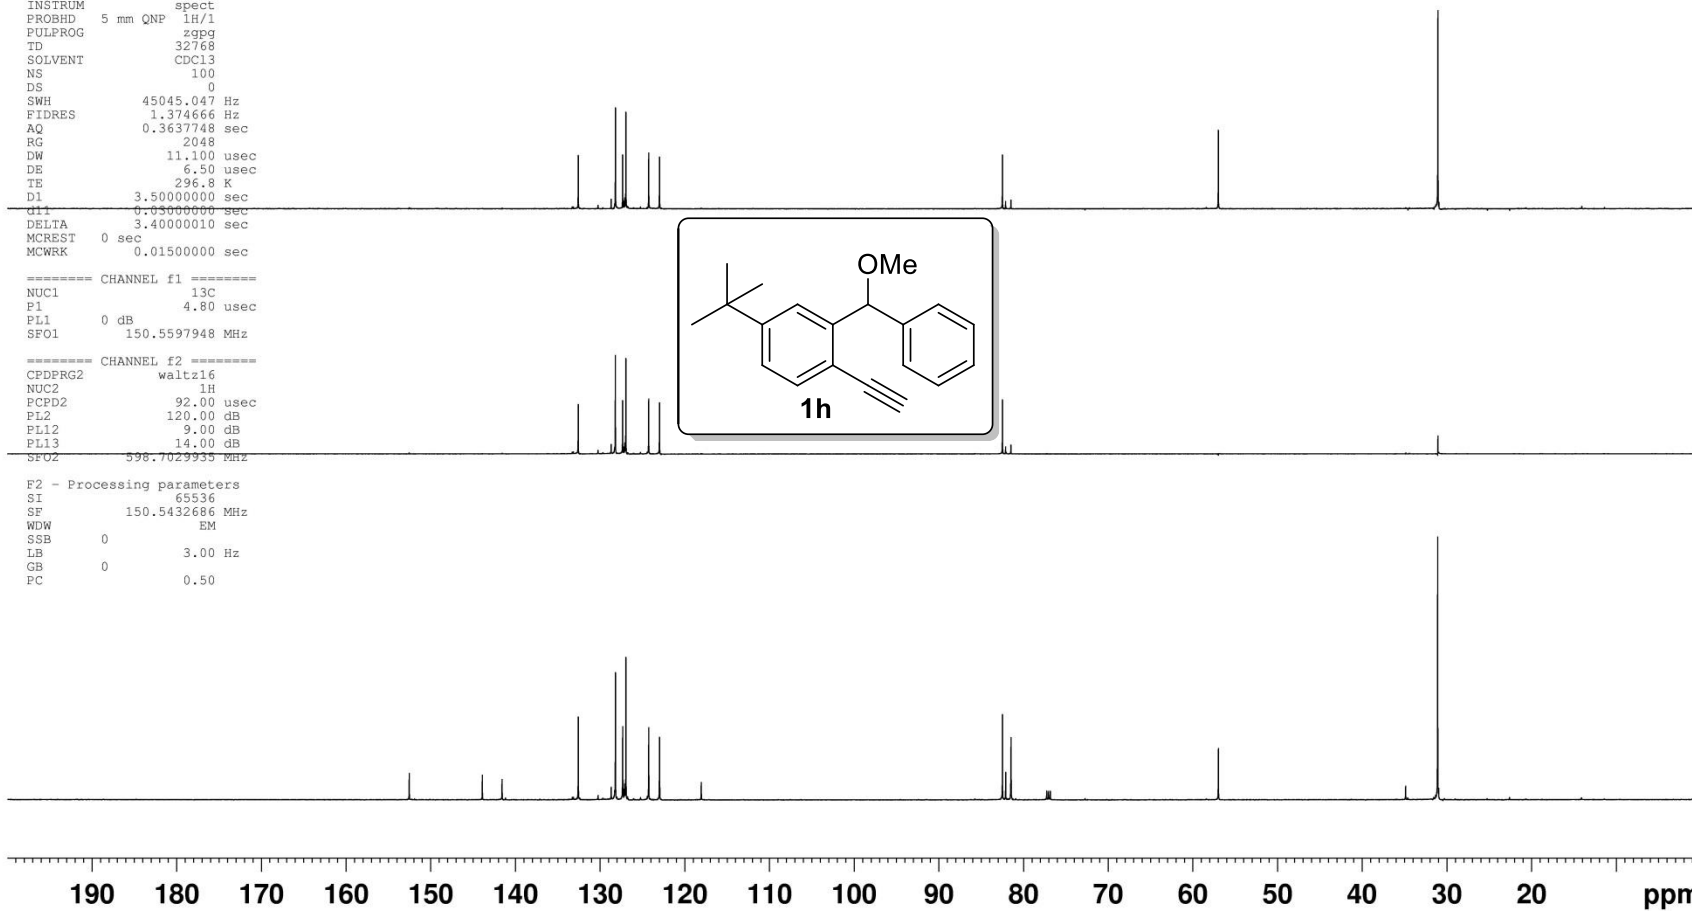

Current Data Parameters  
NAME 2014-04-21  
EXPNO 1  
PROCNO 1

F2 - Acquisition Parameters  
Date\_ 20140422  
Time 6.37  
INSTRUM spect  
PROBHD 5 mm QNP 1H/1  
PULPROG zg  
TD 32768  
SOLVENT CDCl3  
NS 16  
DS 0  
SWH 9578.544 Hz  
FIDRES 0.292314 Hz  
AQ 1.7105396 sec  
RG 32  
DW 52.200 usec  
DE 6.50 usec  
TE 296.6 K  
D1 2.0000000 sec  
MCREST 0 sec  
MCWRK 0.0150000 sec

===== CHANNEL f1 =====  
NUC1 1H  
P1 10.00 usec  
PL1 3.00 dB  
SFO1 598.7035922 MHz

F2 - Processing parameters  
SI 32768  
SF 598.7000267 MHz  
WDW no  
SSB 0  
LB 0 Hz  
GB 0  
PC 1.00

7.650  
7.647  
7.442  
7.428  
7.394  
7.381  
7.223  
7.220  
7.210  
7.206  
7.198  
7.185

5.802

3.442  
3.429

2.367

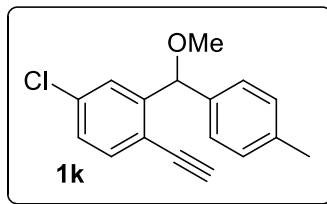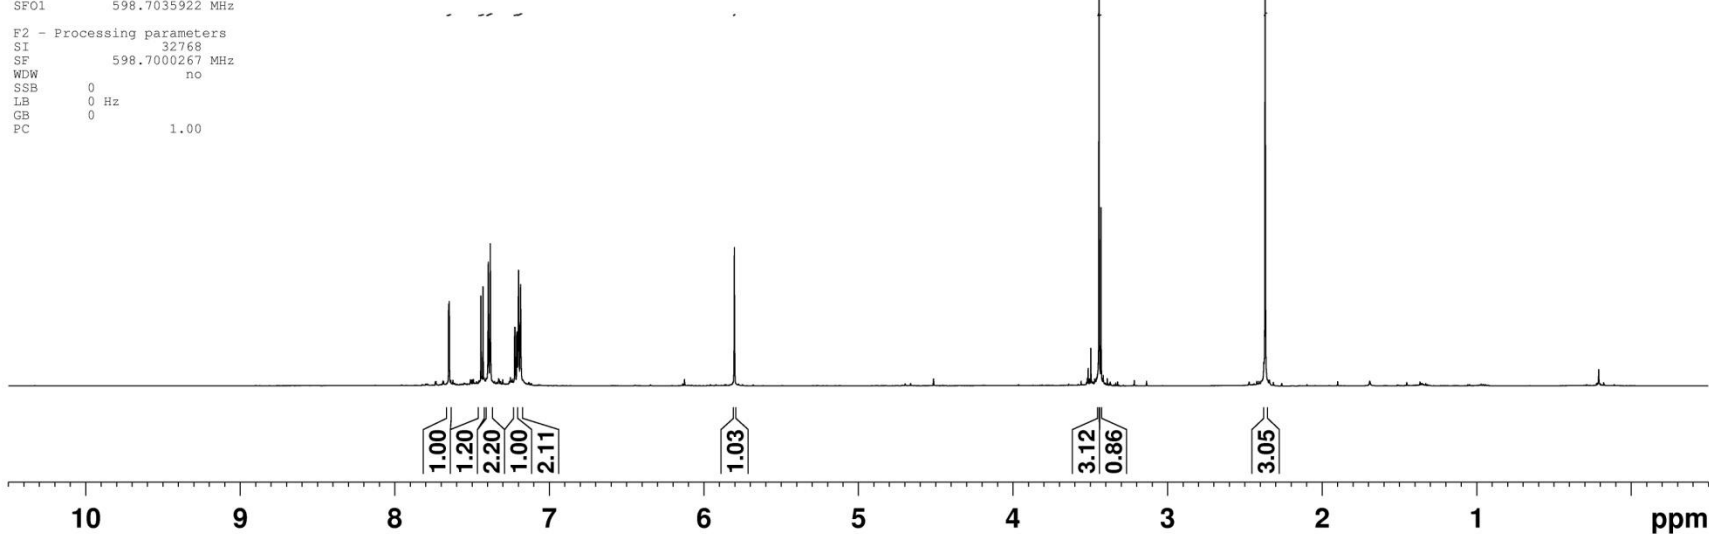

Current Data Parameters  
NAME 2014-04-21  
EXPNO 2  
PROCNO 1

F2 - Acquisition Parameters  
Date\_ 20140422  
Time 6.44  
INSTRUM spect  
PROBHD 5 mm QNP 1H/1  
PULPROG zgpg  
TD 32768  
SOLVENT CDCl3  
NS 100  
DS 0  
SWH 45045.047 Hz  
FIDRES 1.374666 Hz  
AQ 0.3637748 sec  
RG 2048  
DW 11.100 usec  
DE 6.50 usec  
TE 298.0 K  
D1 3.50000000 sec  
d11 0.03000000 sec  
DELTA 3.40000010 sec  
MCREST 0 sec  
MCWRK 0.01500000 sec

===== CHANNEL f1 =====  
NUC1 13C  
P1 4.80 usec  
PL1 0 dB  
SFO1 150.5597948 MHz

===== CHANNEL f2 =====  
CPDPRG2 waltz16  
NUC2 1H  
PCPD2 92.00 usec  
PL2 120.00 dB  
PL12 9.00 dB  
PL13 14.00 dB  
SFO2 598.7029935 MHz

F2 - Processing parameters  
SI 65536  
SF 150.5432699 MHz  
WDW EM  
SSB 0  
LB 3.00 Hz  
GB 0  
PC 1.00

146.71  
137.58  
137.27  
135.38  
133.93  
128.98  
127.35  
126.82  
126.31  
119.07  
83.07  
81.69  
80.92  
77.22  
77.00  
76.79  
56.88  
21.01

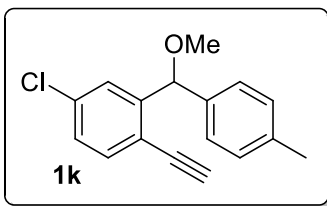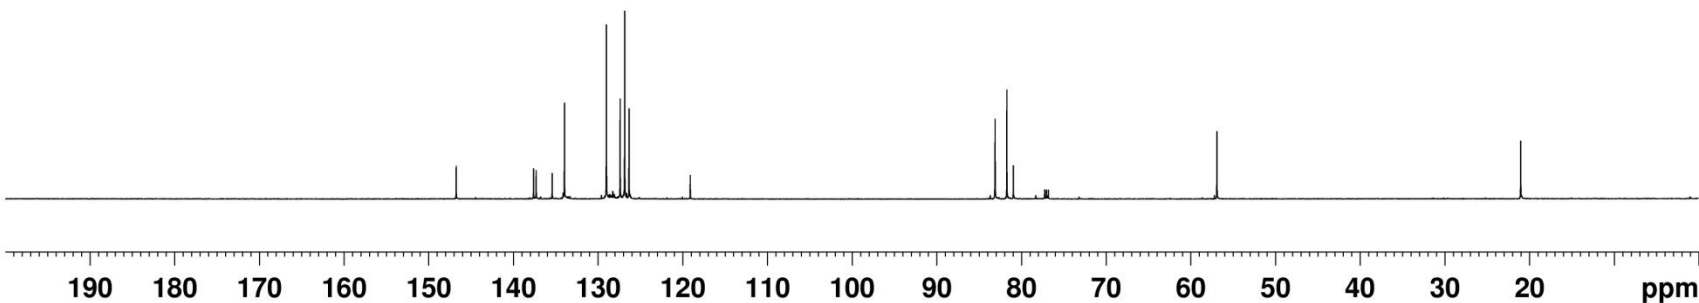

Current Data Parameters  
NAME 0422.fid  
EXPNO 1  
PROCNO 1  
F2 - Processing parameters  
SI 16384  
SF 499.8068866 MHz  
WDW EM  
SSB 0  
LB 0.30 Hz  
GB 0  
PC 1.00

7.604  
7.600  
7.471  
7.455  
7.443  
7.426  
7.360  
7.343  
7.261  
7.256  
7.244  
7.240

5.807

3.459  
3.438

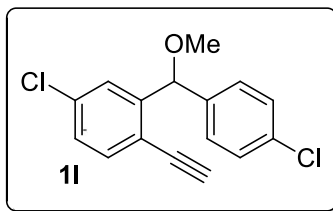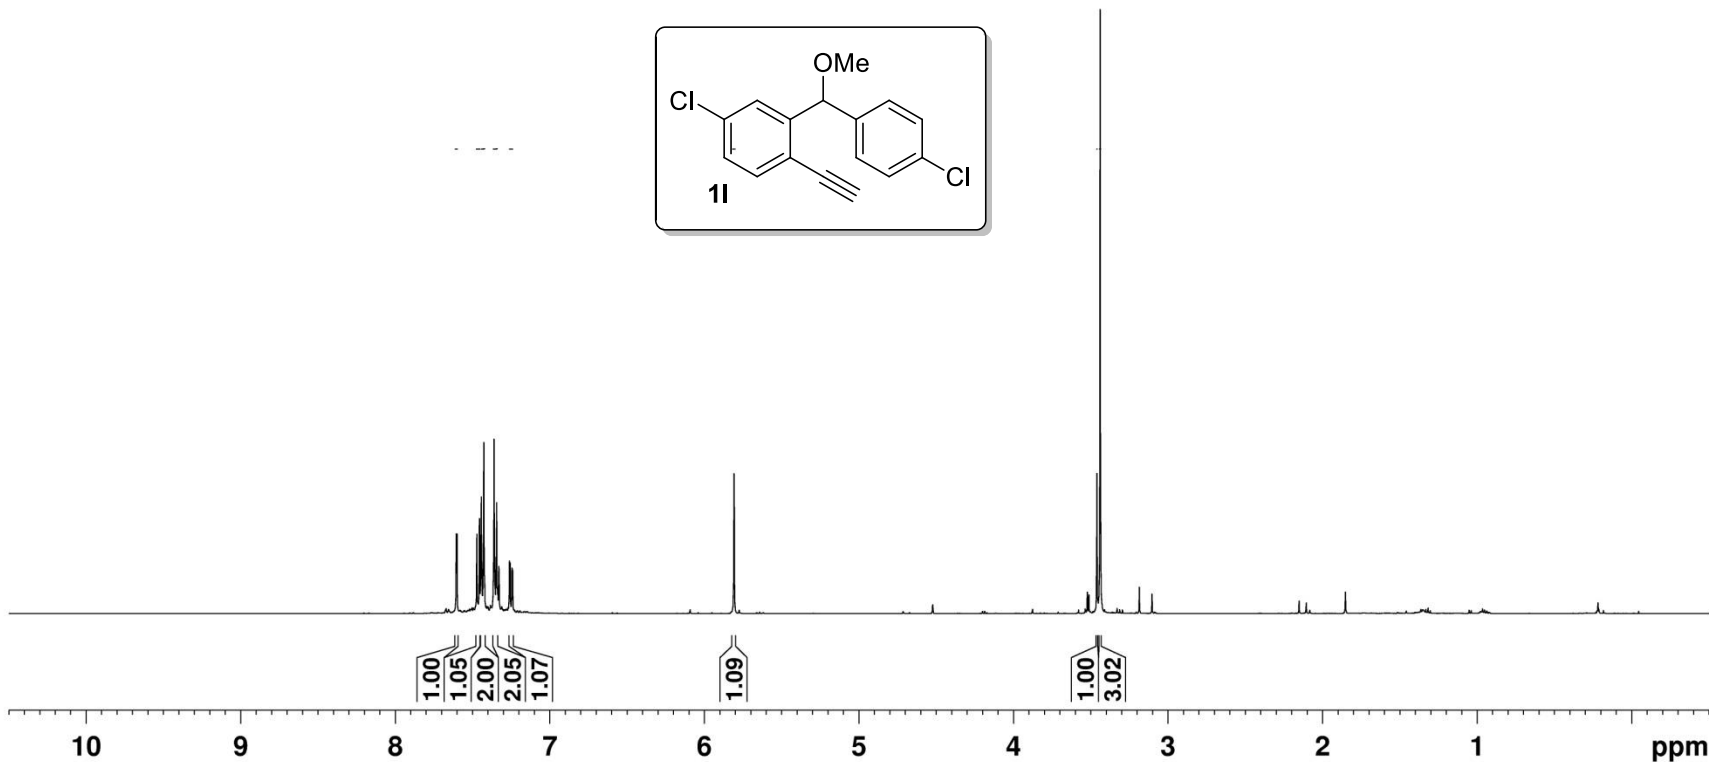

Current Data Parameters  
NAME 0422.fid  
EXPNO 2  
PROCNO 1

F2 - Processing parameters  
SI 65536  
SF 125.6794580 MHz  
WDW EM  
SSB 0  
LB 0.30 Hz  
GB 0  
PC 1.00

145.98  
139.17  
135.52  
134.01  
133.36  
128.43  
128.15  
127.65  
126.22  
119.09

83.35  
81.03  
80.75  
77.25  
77.00  
76.74

56.94

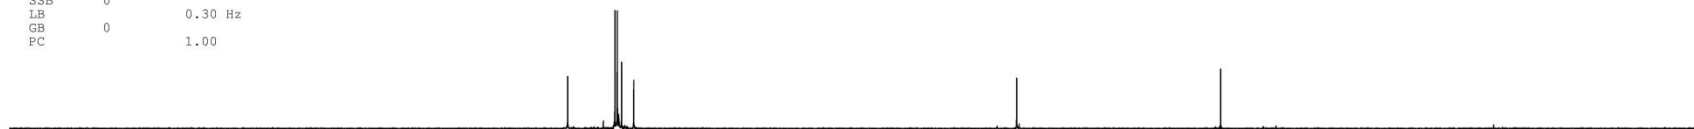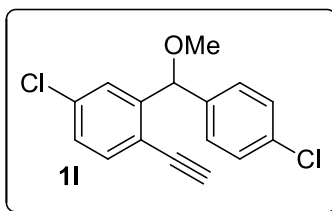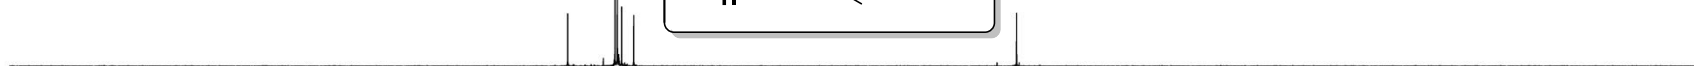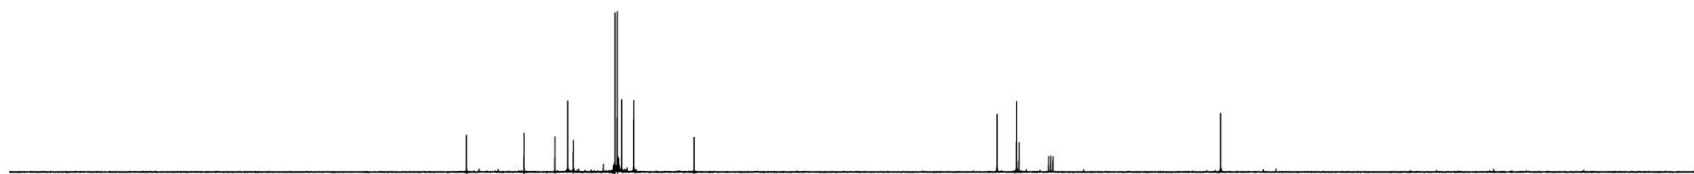

190 180 170 160 150 140 130 120 110 100 90 80 70 60 50 40 30 20 ppm

```

Current Data Parameters
NAME      2013-09-03-Intermediate
EXPNO     1
PROCNO    1

F2 - Acquisition Parameters
Date_     20131030
Time      9.19
INSTRUM   spect
PROBHD    5 mm QNP 1H/1
PULPROG   zg
TD         32768
SOLVENT   CDCl3
NS         16
DS         0
SWH       8389.262 Hz
FIDRES    0.256020 Hz
AQ         1.9530228 sec
RG         128
DW         59.600 usec
DE         6.50 usec
TE         297.0 K
D1         2.0000000 sec
MCREST    0 sec
MCWRK     0.0150000 sec

----- CHANNEL f1 -----
NUC1      1H
P1        10.00 usec
PL1       0 dB
SFO1     598.7029935 MHz

F2 - Processing parameters
SI         32768
SF         598.7000263 MHz
WDW        no
SSB        0
LB         0 Hz
GB         0
PC         1.00

```

7.299  
7.297  
7.294  
7.288  
7.285  
7.283  
7.275  
7.272  
7.269  
7.255  
7.252  
7.250  
7.244  
7.243  
7.240  
7.236  
7.230  
7.228  
7.226  
7.138  
7.137  
7.134  
7.133  
7.124  
7.123  
7.121  
7.120  
7.091  
7.088  
7.085  
7.079  
7.077  
7.075  
7.060  
7.047  
6.978  
6.977  
6.976  
6.975  
5.688  
4.446

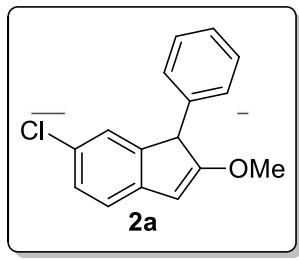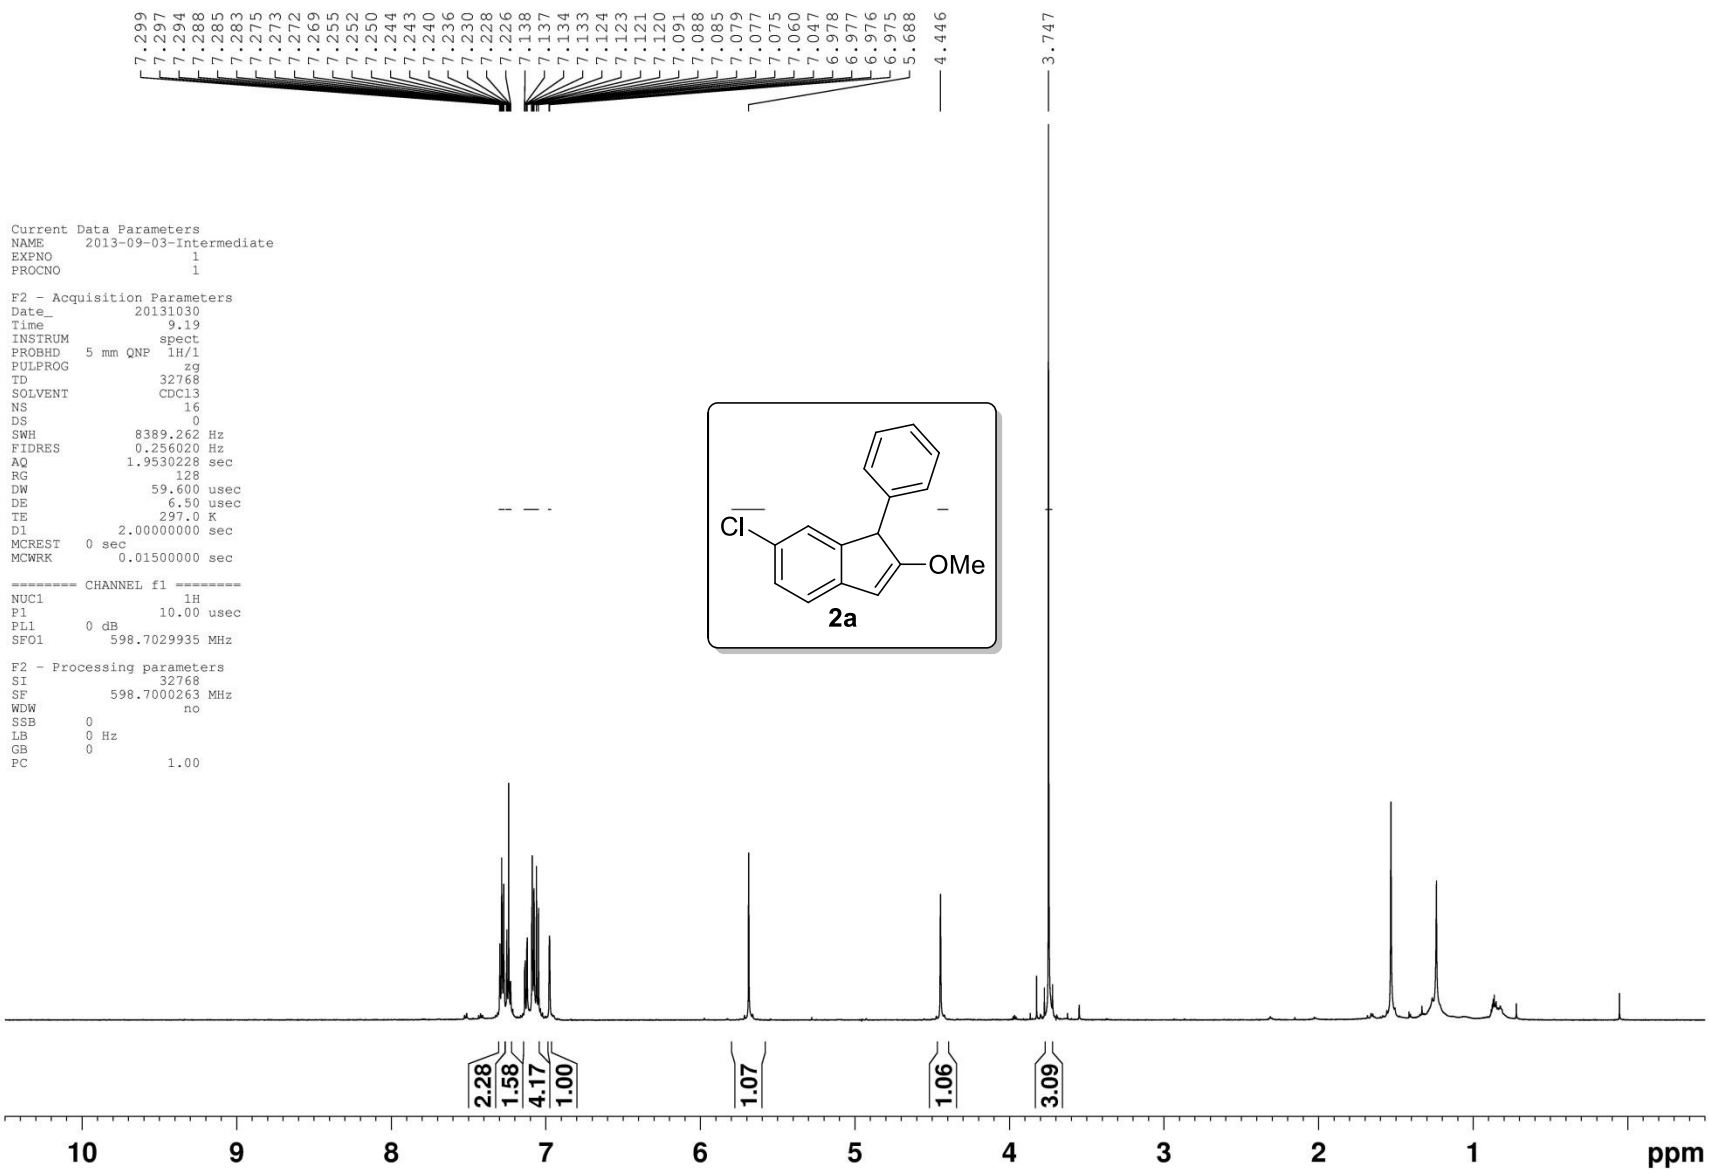

170.06

143.39

142.27

137.74

128.81

128.49

128.12

127.31

127.16

123.97

119.82

98.39

77.21

77.00

76.79

57.66

54.74

Current Data Parameters  
NAME 2013-09-03-Intermediate  
EXPNO 2  
PROCNO 1

F2 - Acquisition Parameters  
Date\_ 20131030  
Time 9.45  
INSTRUM spect  
PROBHD 5 mm QNP 1H/1  
PULPROG zgpg  
TD 32768  
SOLVENT CDCl3  
NS 579  
DS 0  
SWH 45045.047 Hz  
FIDRES 1.374666 Hz  
AQ 0.3637748 sec

DW 11.100 usec  
DE 6.50 usec  
TE 298.3 K  
D1 3.50000000 sec  
d11 0.03000000 sec  
DELTA 3.40000010 sec  
MCREST 0 sec  
MCWRK 0.01500000 sec

===== CHANNEL f1 =====  
NUC1 13C  
P1 4.80 usec  
PL1 0 dB  
SFO1 150.5597948 MHz

===== CHANNEL f2 =====  
CPDPRG2 waltz16  
NUC2 1H  
PCPD2 92.00 usec  
PL2 120.00 dB  
PL12 19.00 dB  
PL13 14.00 dB  
SFO2 598.7029935 MHz

F2 - Processing parameters  
SI 65536  
SF 150.5432369 MHz  
WDW EM  
SSB 0  
LB 3.00 Hz  
GB 0  
PC 0.50

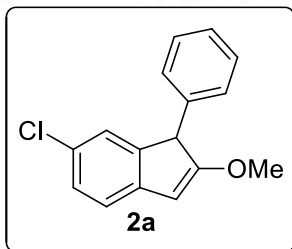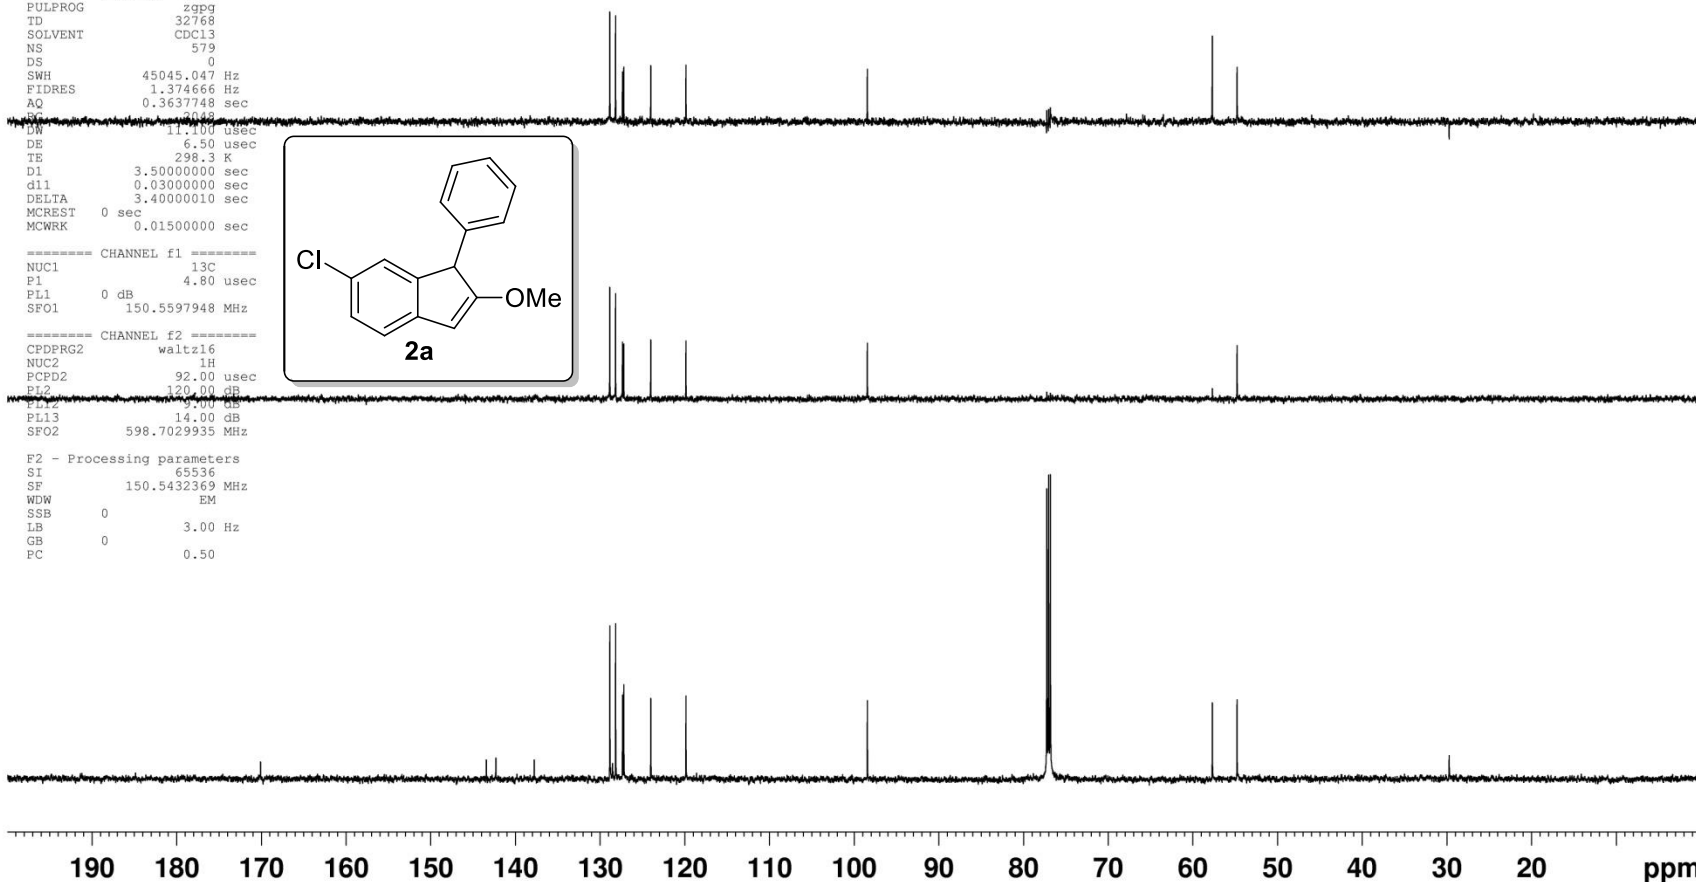

Current Data Parameters  
 NAME 2013-11-25-P  
 EXPNO 1  
 PROCNO 1

F2 - Acquisition Parameters  
 Date\_ 20131126  
 Time 6.29  
 INSTRUM spect  
 PROBHD 5 mm QNP 1H/1  
 PULPROG zg  
 TD 41106  
 SOLVENT CDCl3  
 NS 16  
 DS 0  
 SWH 7183.908 Hz  
 FIDRES 0.174765 Hz  
 AQ 2.8610277 sec  
 RG 128  
 DW 69.600 usec  
 DE 6.50 usec  
 TE 295.9 K  
 D1 2.0000000 sec  
 MCRCST 0 sec  
 MCWRK 0.0150000 sec

===== CHANNEL f1 =====  
 NUC1 1H  
 P1 8.90 usec  
 PL1 3.00 dB  
 SFO1 598.7029935 MHz

F2 - Processing parameters  
 SI 32768  
 SF 598.7000255 MHz  
 WDW EM  
 SSB 0  
 LB 2.00 Hz  
 GB 0  
 PC 1.00

7.308  
 7.296  
 7.284  
 7.261  
 7.249  
 7.241  
 7.111  
 7.109  
 7.074  
 7.066  
 7.061  
 7.053  
 6.887  
 6.883  
 6.870  
 6.857  
 6.854  
 6.770  
 6.756

5.692

4.458

3.747

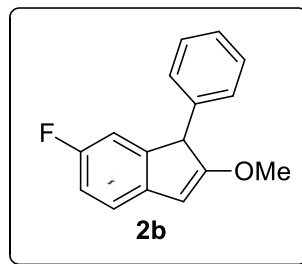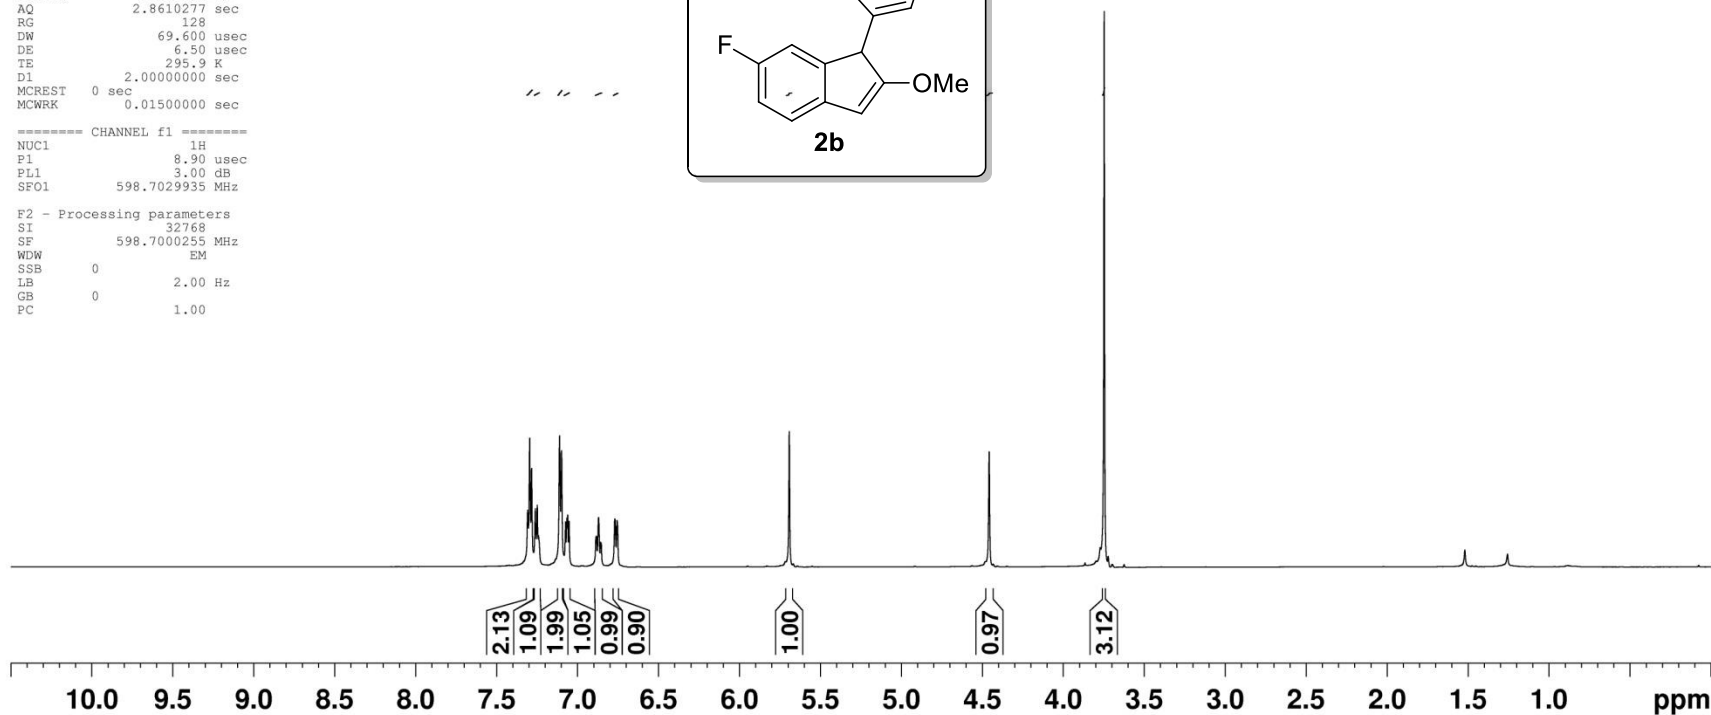



— 169.36  
 — 160.98  
 — 159.38  
 — 143.55  
 — 143.50  
 — 139.42  
 — 138.00  
 — 128.77  
 — 128.10  
 — 127.25  
 — 119.36  
 — 119.30  
 — 113.58  
 — 113.44  
 — 111.62  
 — 111.46  
 — 98.20  
 — 77.21  
 — 77.00  
 — 76.79  
 — 57.55  
 — 54.88

Current Data Parameters  
 NAME 2013-11-25-P  
 EXPNO 2  
 PROCNO 1

F2 - Acquisition Parameters  
 Date\_ 20131126  
 Time 6.34  
 INSTRUM spect  
 PROBHD 5 mm QNP 1H/1  
 PULPROG zgpg  
 TD 32768  
 SOLVENT CDCl3  
 NS 125  
 DS 0  
 SWH 45045.047 Hz  
 FIDRES 1.374666 Hz  
 AQ 0.3637748 sec  
 RG 72048

DW 11.100 usec  
 DE 6.50 usec  
 TE 297.2 K  
 D1 3.50000000 sec  
 d11 0.03000000 sec  
 DELTA 3.40000010 sec  
 MCREST 0 sec  
 MCWRK 0.01500000 sec

===== CHANNEL f1 =====  
 NUC1 13C  
 P1 4.80 usec  
 PL1 0 dB  
 SFO1 150.5597948 MHz

===== CHANNEL f2 =====  
 CPDPRG2 waltz16  
 NUC2 1H  
 PCPD2 92.00 usec  
 PL2 120.00 dB  
 PL12 9.00 dB  
 PL13 14.00 dB  
 SFO2 598.7029935 MHz

F2 - Processing parameters  
 SI 65536  
 SF 150.5432404 MHz  
 WDW EM  
 SSB 0  
 LB 3.00 Hz  
 GB 0  
 PC 0.50

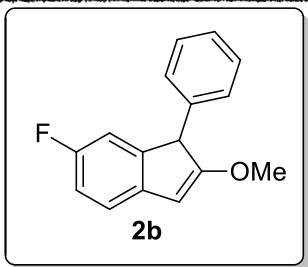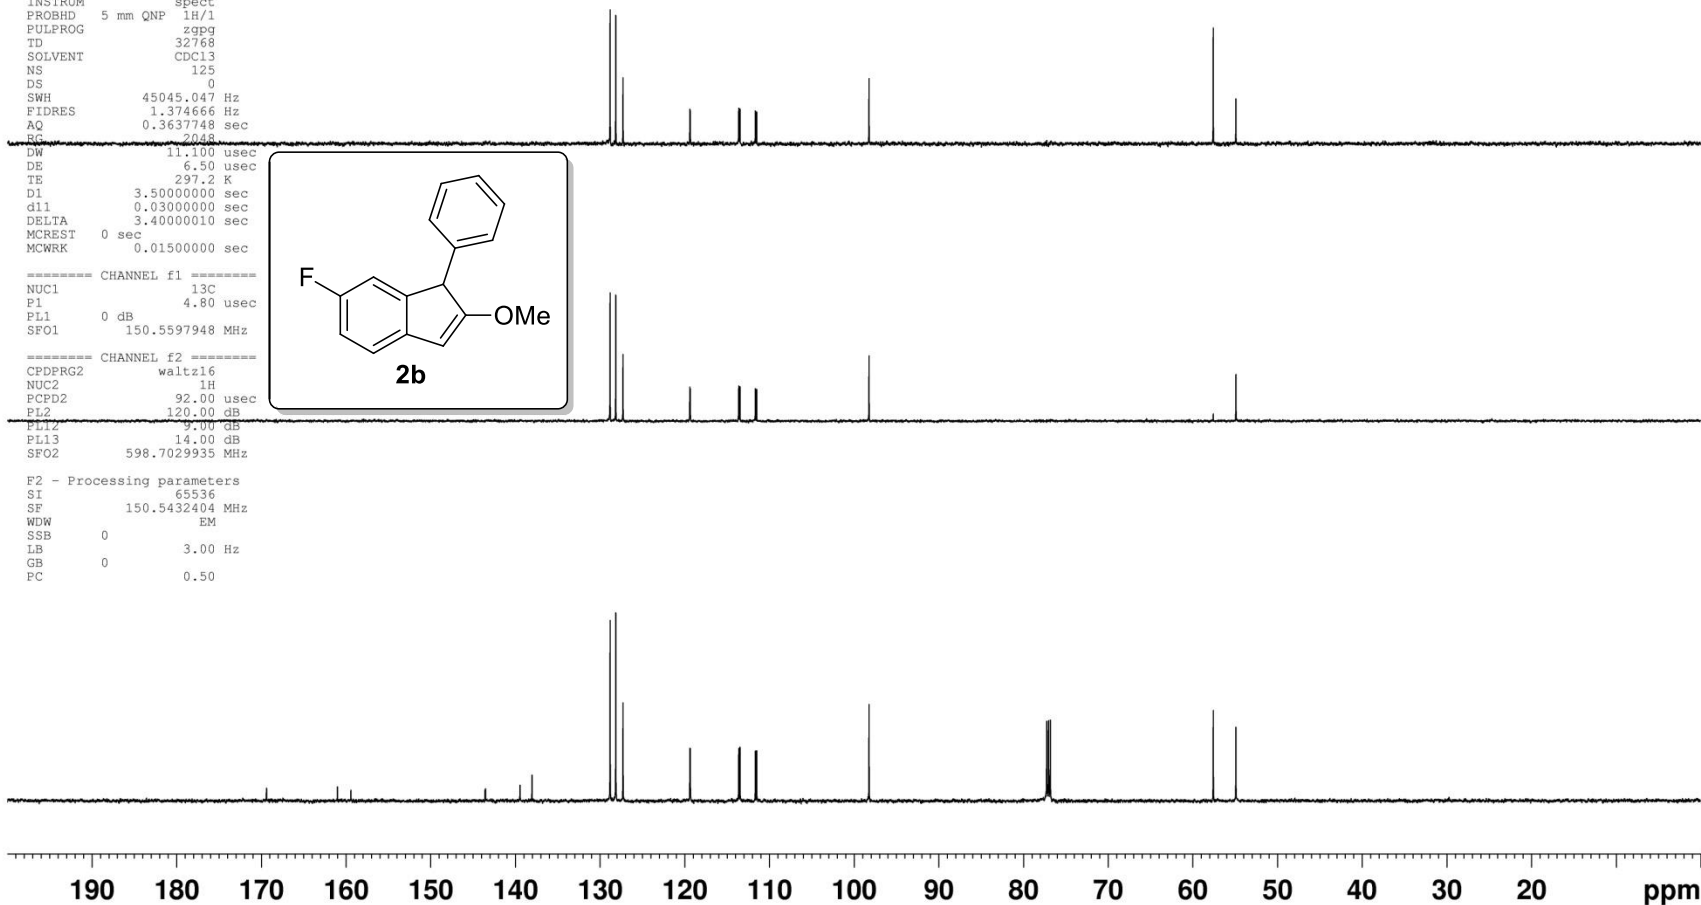

```

Current Data Parameters
NAME      2013-12-16
EXPNO    1
PROCNO   1

F2 - Acquisition Parameters
Date_    20131216
Time     14.03
INSTRUM  spect
PROBHD   5 mm QNP 1H/1
PULPROG  zg
TD        32768
SOLVENT  CDCl3
NS        16
DS        0
SWH      8382.222 Hz
FIDRES   0.255805 Hz
AQ        1.9546632 sec
RG        512
DW        59.650 usec
DE        6.50 usec
TE        295.3 K
D1        2.0000000 sec
MCREST    0 sec
MCWRK    0.01500000 sec

----- CHANNEL f1 -----
NUC1      1H
P1        10.00 usec
PL1       0 dB
SFO1     598.7029935 MHz

F2 - Processing parameters
SI        32768
SF        598.7000264 MHz
WDW       no
SSB       0
LB        0 Hz
GB        0
PC        1.00

```

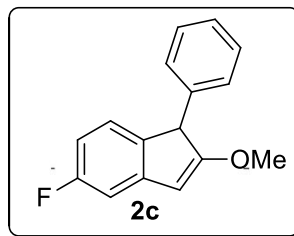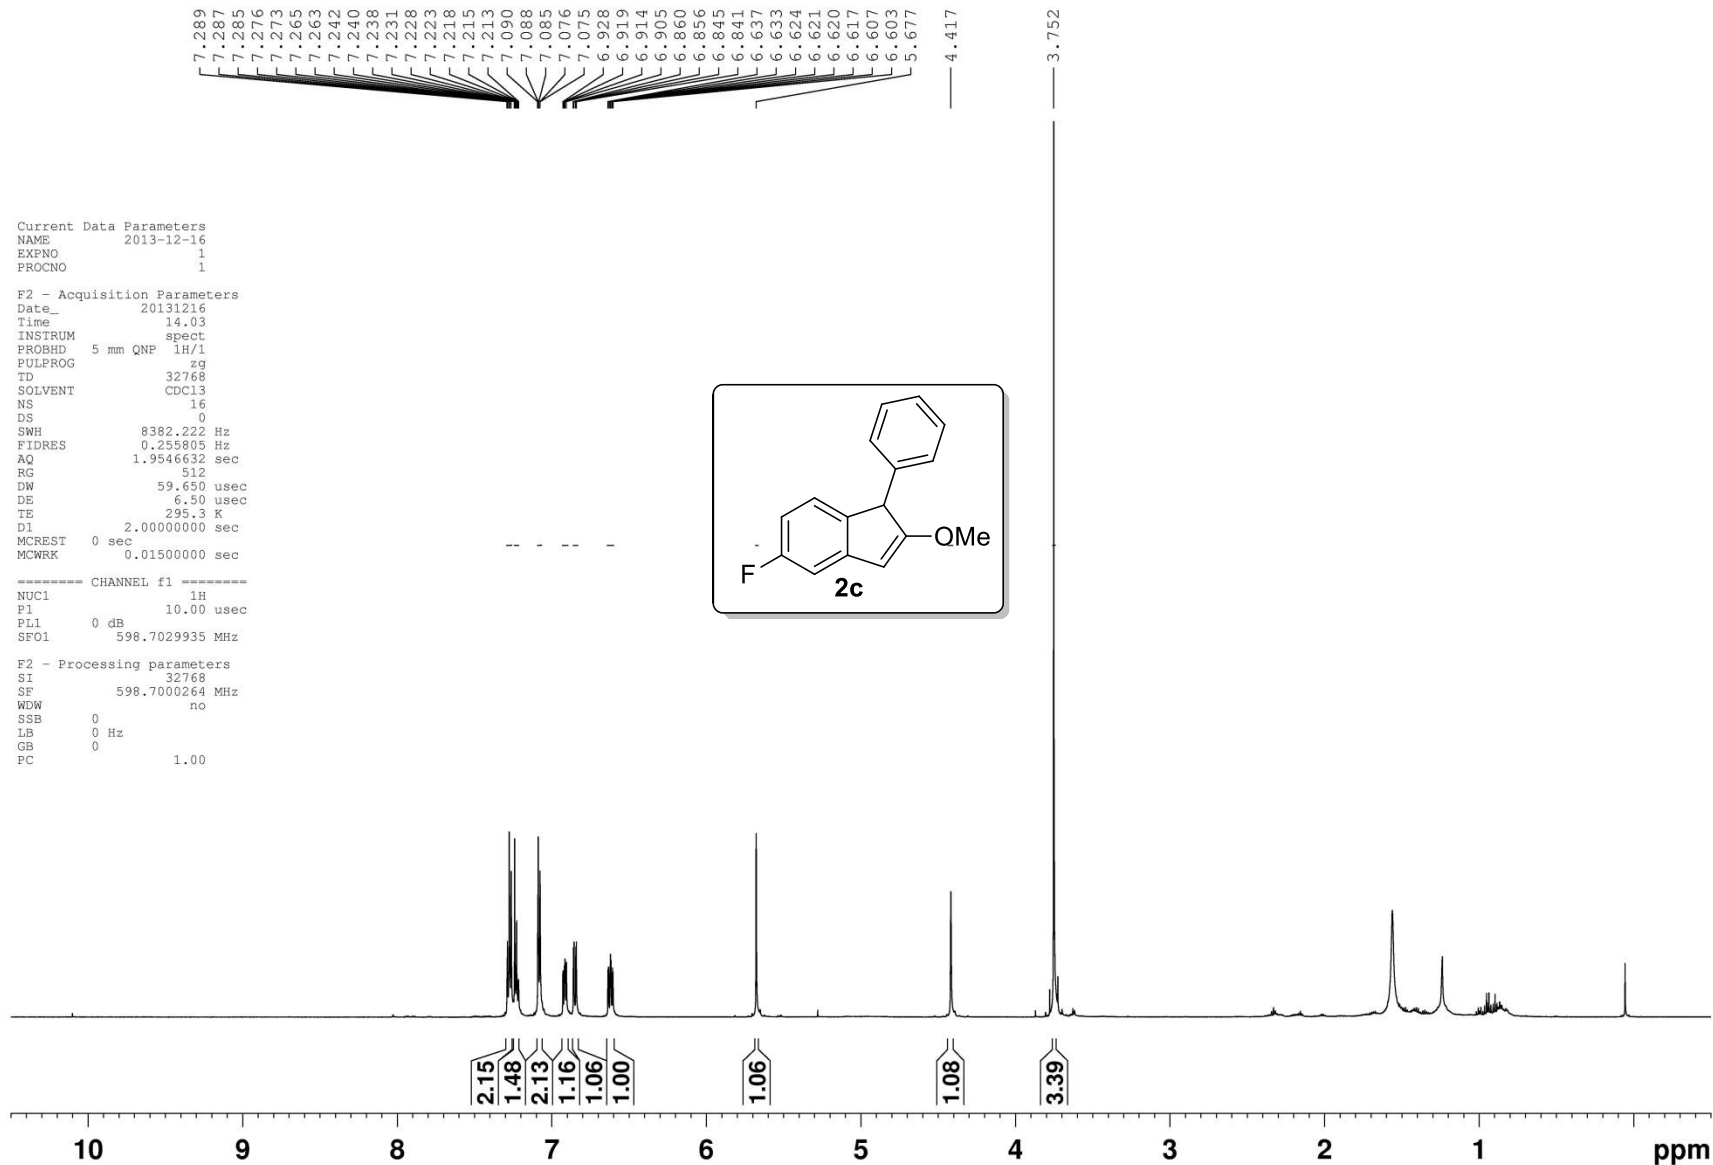

Current Data Parameters  
NAME 2013-12-16  
EXPNO 2  
PROCNO 1

F2 - Acquisition Parameters  
Date\_ 20131216  
Time 14.05  
INSTRUM spect  
PROBHD 5 mm QNP 1H/1  
PULPROG zgpg  
TD 32768  
SOLVENT CDC13  
NS 5120  
DS 0  
SWH 45045.047 Hz  
FIDRES 1.374666 Hz  
AQ 0.3637748 sec  
RG 2048

DW 11.100 usec  
DE 6.50 usec  
TE 295.4 K  
D1 3.50000000 sec  
d11 0.03000000 sec  
DELTA 3.40000010 sec  
MCREST 0 sec  
MCWRK 0.01500000 sec

===== CHANNEL f1 =====  
NUC1 13C  
P1 4.80 usec  
PL1 0 dB  
SFO1 150.5597948 MHz

===== CHANNEL f2 =====  
CPDPRG2 waltz16  
NUC2 1H  
PCPD2 92.00 usec  
PL2 120.00 dB  
PL12 9.00 dB  
PL13 14.00 dB  
SFO2 598.7029935 MHz

F2 - Processing parameters  
SI 65536  
SF 150.5432376 MHz  
WDW EM  
SSB 0  
LB 3.00 Hz  
GB 0  
PC 0.50

171.53  
163.62  
162.01  
145.84  
145.78  
138.29  
137.03  
128.72  
128.10  
127.16  
124.33  
124.27  
109.21  
109.06  
106.58  
106.43  
98.58  
77.21  
77.00  
76.79  
57.67  
54.09

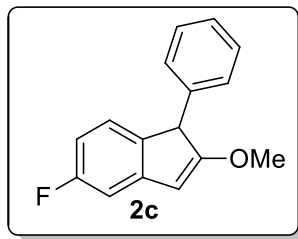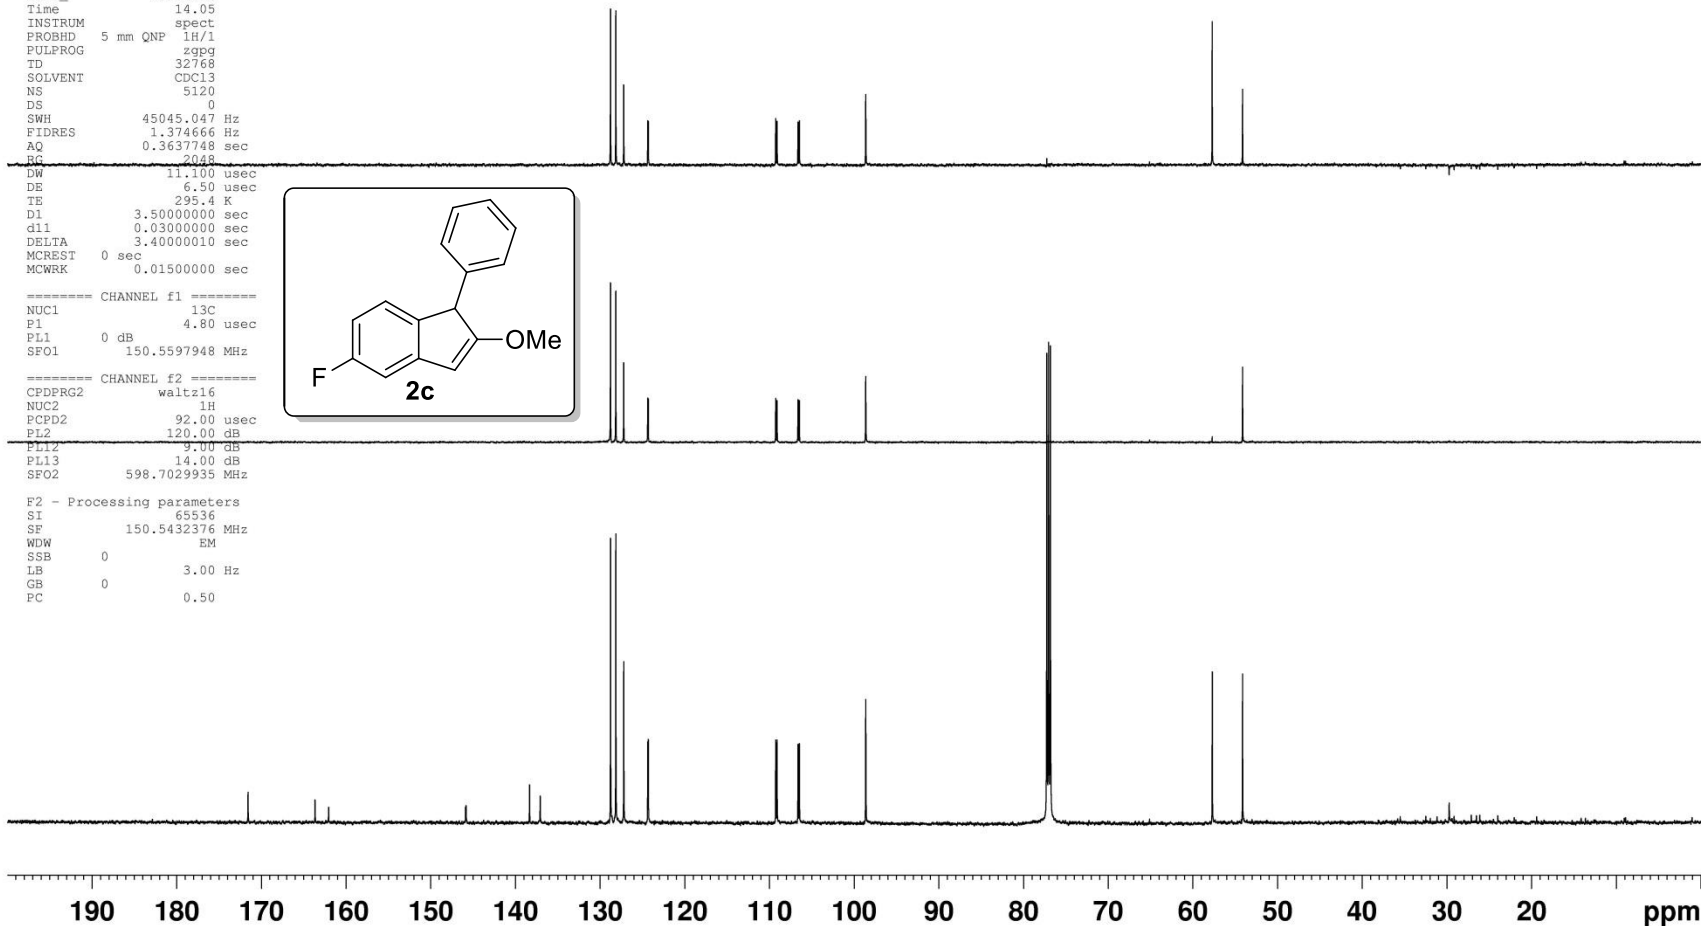

```

Current Data Parameters
NAME      2013-12-20
EXPNO    1
PROCNO   1

F2 - Acquisition Parameters
Date_    20131219
Time     8.21
INSTRUM  spect
PROBHD   5 mm QNP 1H/1
PULPROG  zg
TD        32768
SOLVENT  CDCl3
NS        16
DS        0
SWH      8382.222 Hz
FIDRES   0.255805 Hz
AQ        1.9546632 sec
RG        512
DW        59.650 usec
DE        6.50 usec
TE        292.8 K
D1        2.0000000 sec
MCREST    0 sec
MCWRK    0.0150000 sec

===== CHANNEL f1 =====
NUC1      1H
P1        10.00 usec
PL1       0 dB
SFO1     598.7029935 MHz

F2 - Processing parameters
SI        32768
SF        598.7000264 MHz
WDW       no
SSB       0
LB        0 Hz
GB        0
PC        1.00

```

7.289  
7.287  
7.284  
7.275  
7.272  
7.265  
7.263  
7.245  
7.243  
7.240  
7.239  
7.237  
7.236  
7.234  
7.231  
7.226  
7.221  
7.218  
7.216  
7.124  
7.123  
7.122  
7.121  
7.084  
7.081  
7.078  
7.069  
6.913  
6.911  
5.666

4.426

3.752

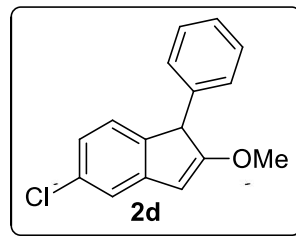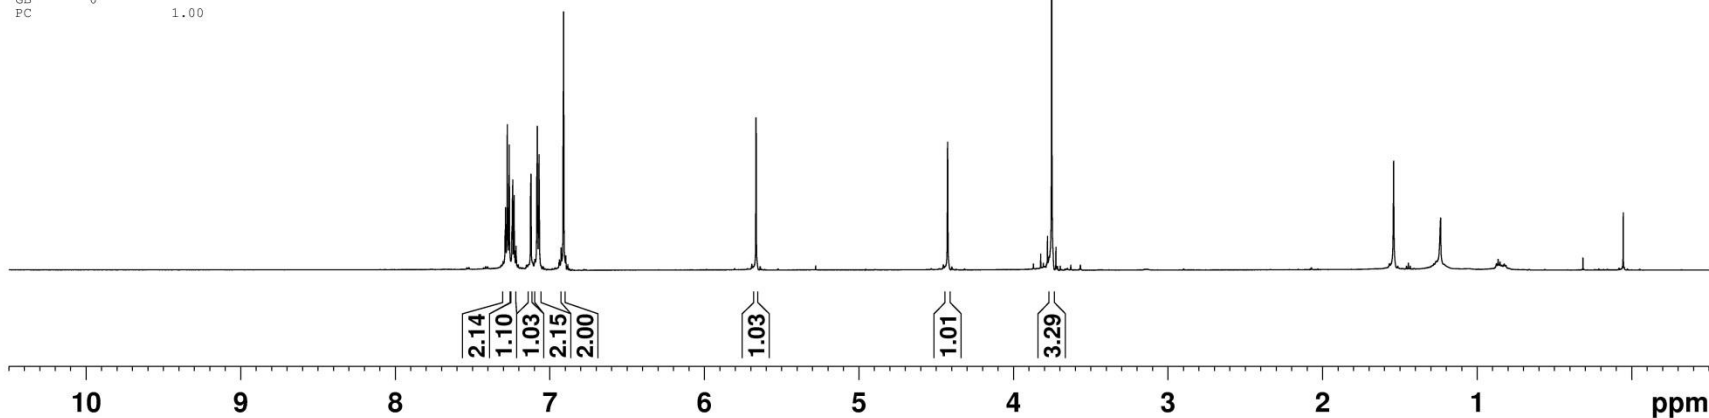

— 171.17

— 145.65

— 139.93

— 137.95

— 132.94

— 128.75

— 128.10

— 127.23

— 124.43

— 122.77

— 119.24

— 98.32

— 77.21

— 77.00

— 76.78

— 57.71

— 54.28

Current Data Parameters  
NAME 2013-12-20  
EXPNO 2  
PROCNO 1

F2 - Acquisition Parameters  
Date\_ 20131219  
Time 8.28  
INSTRUM spect  
PROBHD 5 mm QNP 1H/1  
PULPROG zgpg  
TD 32768  
SOLVENT CDCl3  
NS 325  
DS 0  
SWH 45045.047 Hz  
FIDRES 1.374666 Hz  
AQ 0.3637748 sec

DE 11.100 usec  
TE 294.9 K  
D1 3.50000000 sec  
d11 0.03000000 sec  
DELTA 3.40000010 sec  
MCREST 0 sec  
MCWRK 0.01500000 sec

===== CHANNEL f1 =====  
NUC1 13C  
P1 4.80 usec  
PL1 0 dB  
SFO1 150.5597948 MHz

===== CHANNEL f2 =====  
CPDPRG2 waltz16  
NUC2 1H  
PCPD2 92.00 usec  
PL2 120.00 dB  
PL12 9.00 dB  
PL13 14.00 dB  
SFO2 598.7029935 MHz

F2 - Processing parameters  
SI 65536  
SF 150.5432390 MHz  
WDW EM  
SSB 0  
LB 3.00 Hz  
GB 0  
PC 0.50

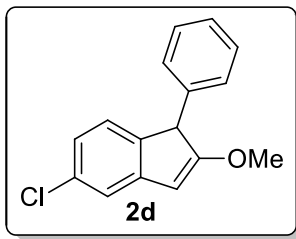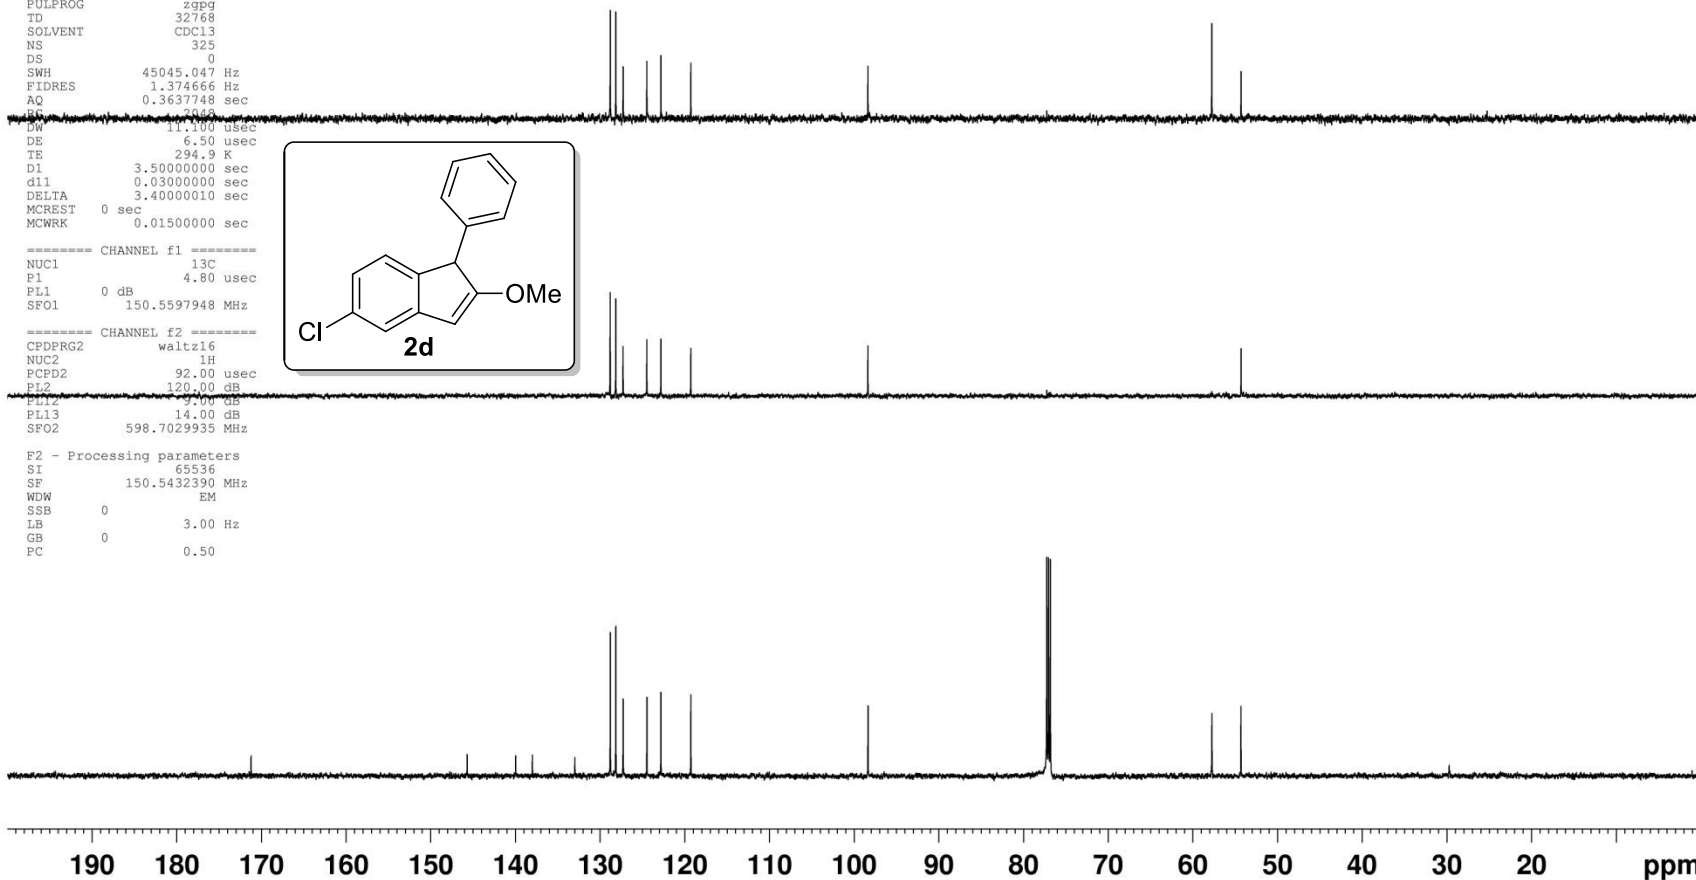

Current Data Parameters  
 NAME 2013-12-24  
 EXPNO 1  
 PROCNO 1

F2 - Acquisition Parameters  
 Date\_ 20131223  
 Time 13.48  
 INSTRUM spect  
 PROBHD 5 mm QNP 1H/1  
 PULPROG zg  
 TD 32768  
 SOLVENT CDCl3  
 NS 16  
 DS 0  
 SWH 8382.222 Hz  
 FIDRES 0.255805 Hz  
 AQ 1.9546632 sec  
 RG 128  
 DW 59.650 usec  
 DE 6.50 usec  
 TE 290.1 K  
 D1 2.0000000 sec  
 MCREST 0 sec  
 MCWRK 0.01500000 sec

----- CHANNEL f1 -----  
 NUC1 1H  
 P1 10.00 usec  
 PL1 0 dB  
 SFO1 598.7029935 MHz

F2 - Processing parameters  
 SI 32768  
 SF 598.7000262 MHz  
 WDW no  
 SSB 0  
 LB 0 Hz  
 GB 0  
 PC 1.00

7.285  
7.283  
7.281  
7.275  
7.272  
7.269  
7.261  
7.259  
7.256  
7.247  
7.246  
7.240  
7.239  
7.237  
7.235  
7.234  
7.232  
7.228  
7.226  
7.224  
7.218  
7.216  
7.214  
7.078  
7.075  
7.072  
7.064  
7.062  
7.059  
6.862  
6.849  
5.658

4.401

3.749

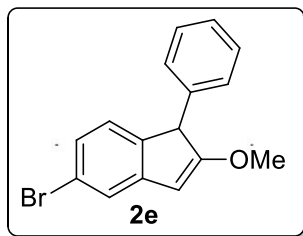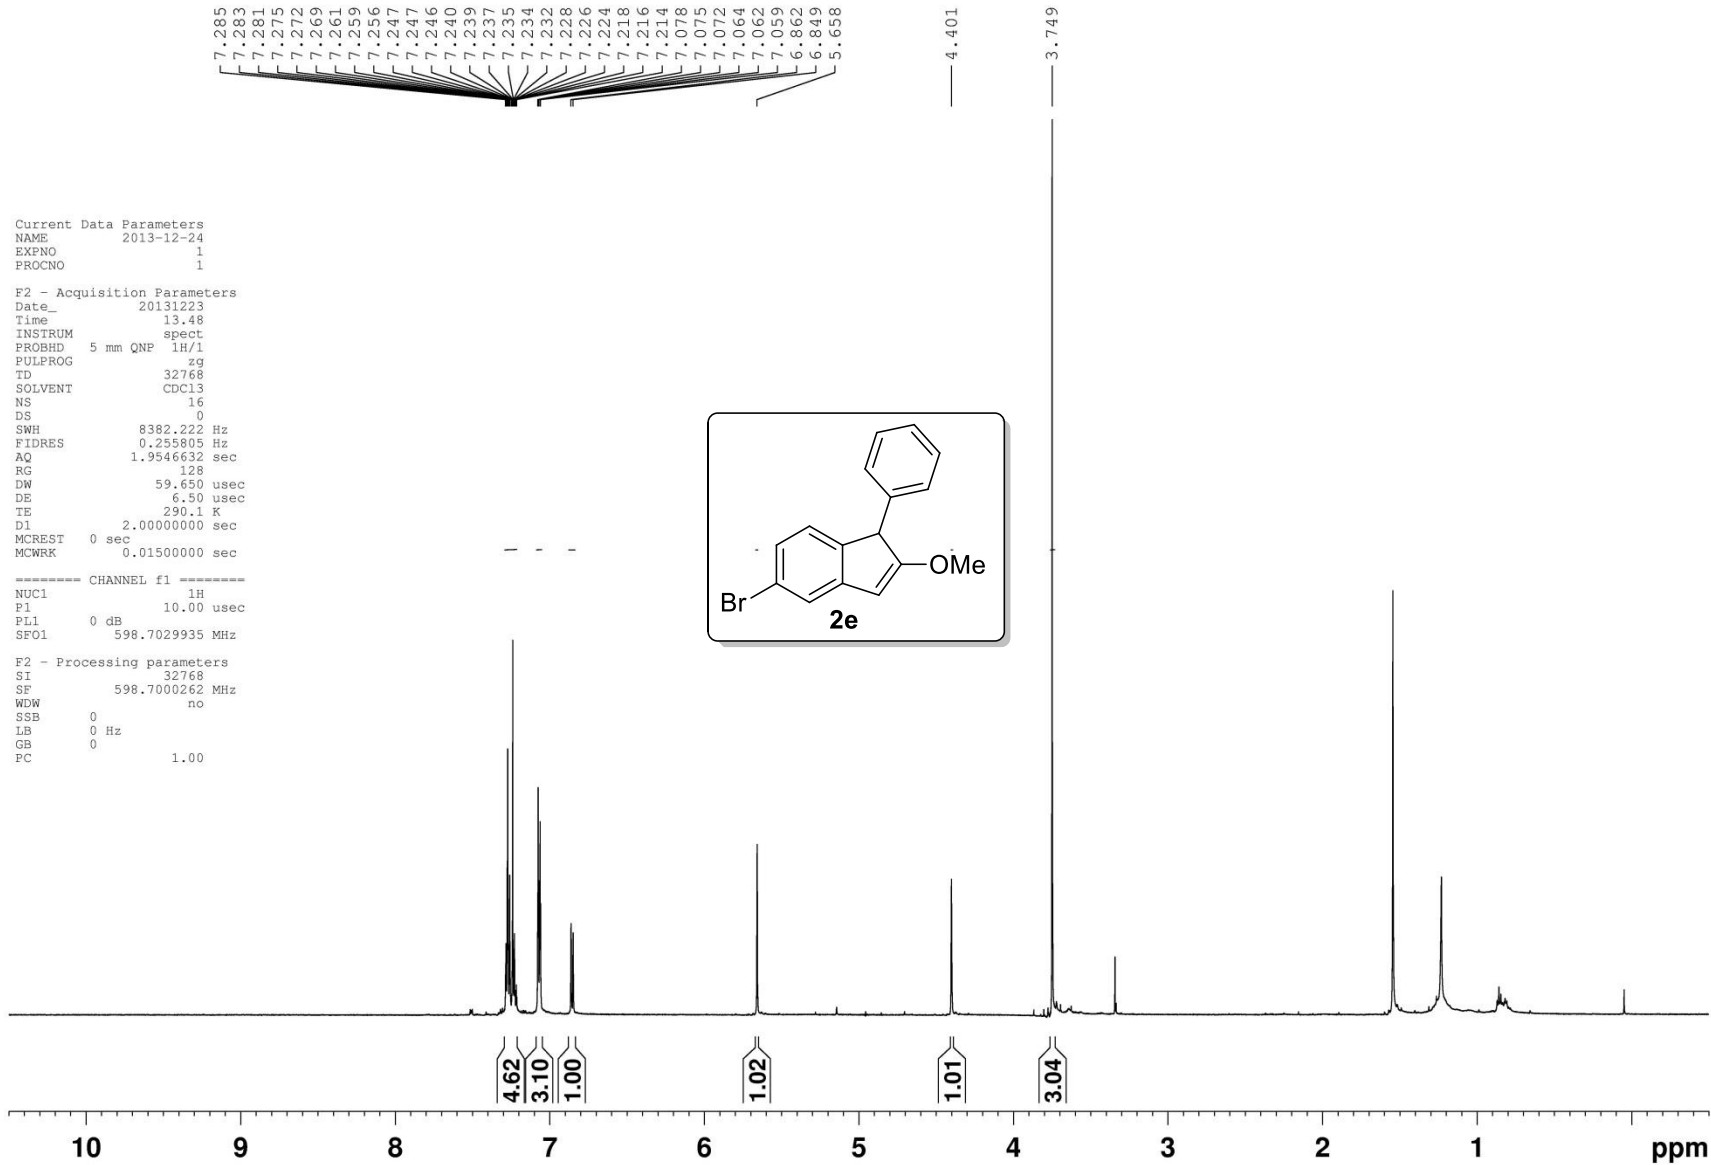

Current Data Parameters  
NAME 2013-12-24  
EXPNO 2  
PROCNO 1

F2 - Acquisition Parameters  
Date\_ 20131223  
Time 13.49  
INSTRUM spect  
PROBHD 5 mm QNP 1H/1  
PULPROG zgpg  
TD 32768  
SOLVENT CDC13  
NS 5120  
DS 0  
SWH 45045.047 Hz  
FIDRES 1.374666 Hz  
AQ 0.3637748 sec  
RG 2048  
DW 11.100 usec  
DE 6.50 usec  
TE 291.0 K  
D1 3.50000000 sec  
d11 0.03000000 sec  
DELTA 3.40000010 sec  
MCREST 0 sec  
MCWRK 0.01500000 sec

===== CHANNEL f1 =====  
NUC1 13C  
P1 4.80 usec  
PL1 0 dB  
SFO1 150.5597948 MHz

===== CHANNEL f2 =====  
CPDPRG2 waltz16  
NUC2 1H  
PCPD2 92.00 usec  
PL2 120.00 dB  
PL12 9.00 dB  
PL13 14.00 dB  
SFO2 598.7029935 MHz

F2 - Processing parameters  
SI 65536  
SF 150.5432376 MHz  
WDW EM  
SSB 0  
LB 3.00 Hz  
GB 0  
PC 0.50

171.06

146.03

140.45

137.83

128.76

128.11

127.26

125.67

124.89

122.10

121.10

98.21

77.21

77.00

76.79

57.73

54.35

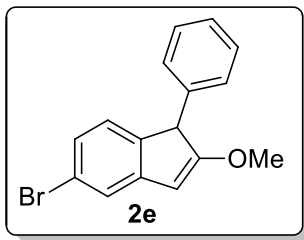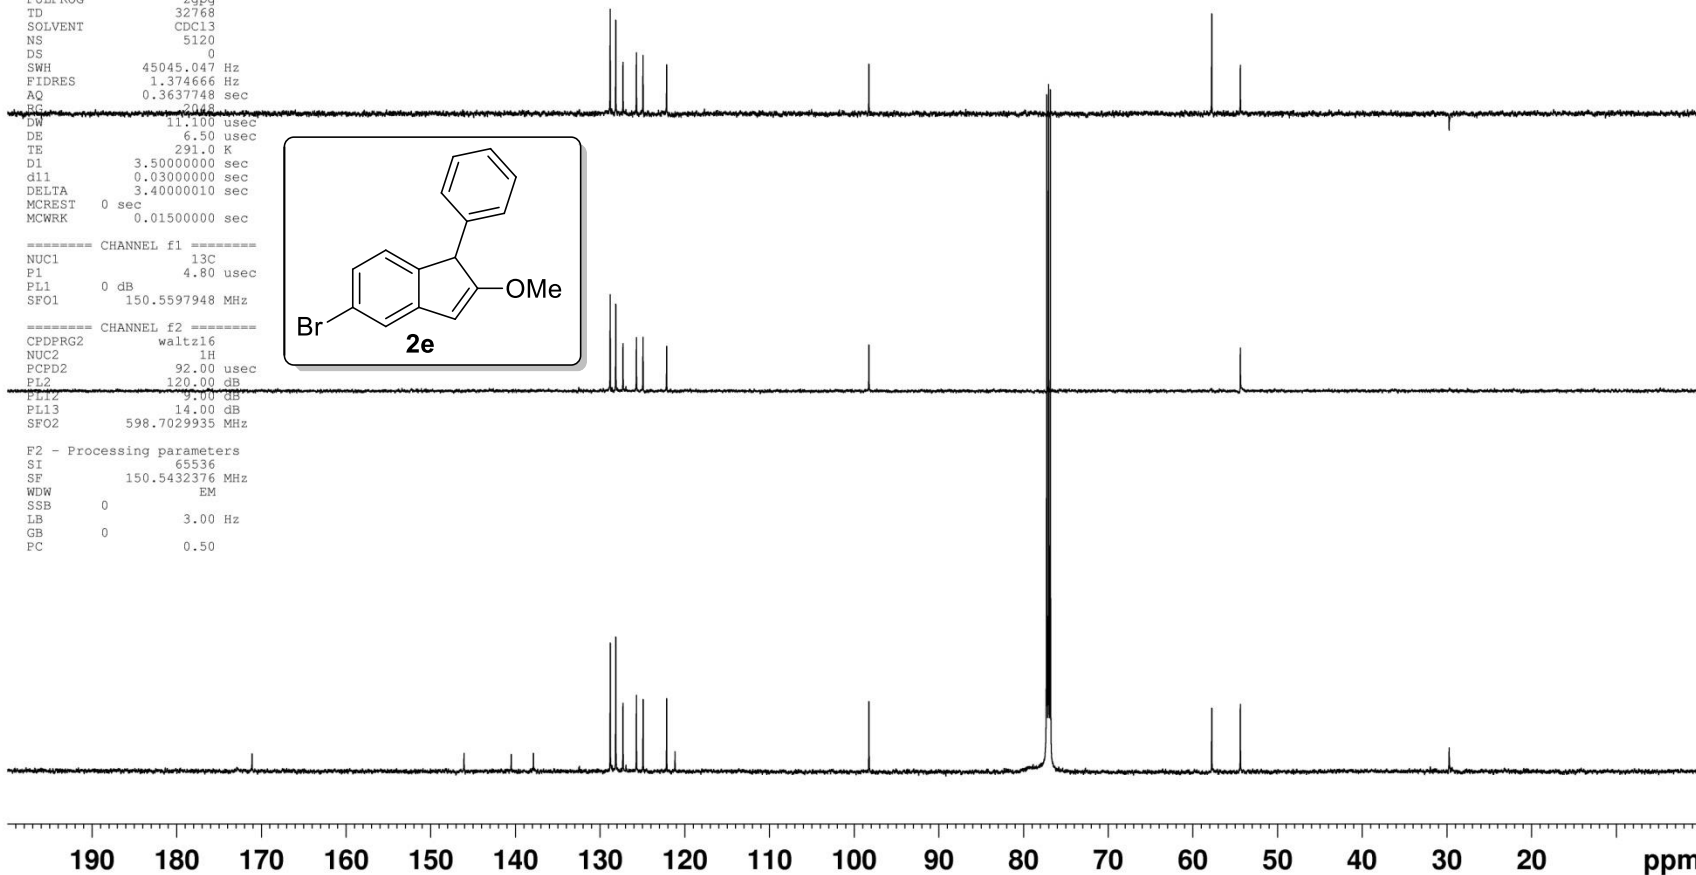

Current Data Parameters  
 NAME 2013-12-01  
 EXPNO 1  
 PROCNO 1

F2 - Acquisition Parameters  
 Date\_ 20131202  
 Time 13.50  
 INSTRUM spect  
 PROBHD 5 mm QNP 1H/1  
 PULPROG zg  
 TD 32768  
 SOLVENT CDCl3  
 NS 16  
 DS 0  
 SWH 8389.262 Hz  
 FIDRES 0.256020 Hz  
 AQ 1.9530228 sec  
 RG 256  
 DW 59.600 usec  
 DE 6.50 usec  
 TE 296.5 K  
 D1 2.0000000 sec  
 MCREST 0 sec  
 MCWRK 0.01500000 sec

----- CHANNEL f1 -----  
 NUC1 1H  
 P1 10.00 usec  
 PL1 0 dB  
 SFO1 598.7029935 MHz

F2 - Processing parameters  
 SI 32768  
 SF 598.7000350 MHz  
 WDW no  
 SSB 0  
 LB 0 Hz  
 GB 0  
 PC 1.00

7.272  
7.270  
7.258  
7.256  
7.248  
7.246  
7.224  
7.220  
7.218  
7.216  
7.209  
7.206  
7.202  
7.195  
7.193  
7.154  
7.153  
7.149  
7.145  
7.107  
7.105  
7.102  
7.093  
7.013  
7.001  
6.955  
6.950  
6.945  
6.943  
6.941  
6.938  
6.933  
6.928  
5.713

4.457

3.742

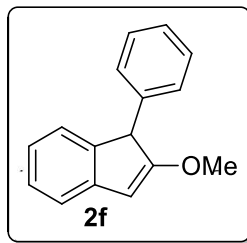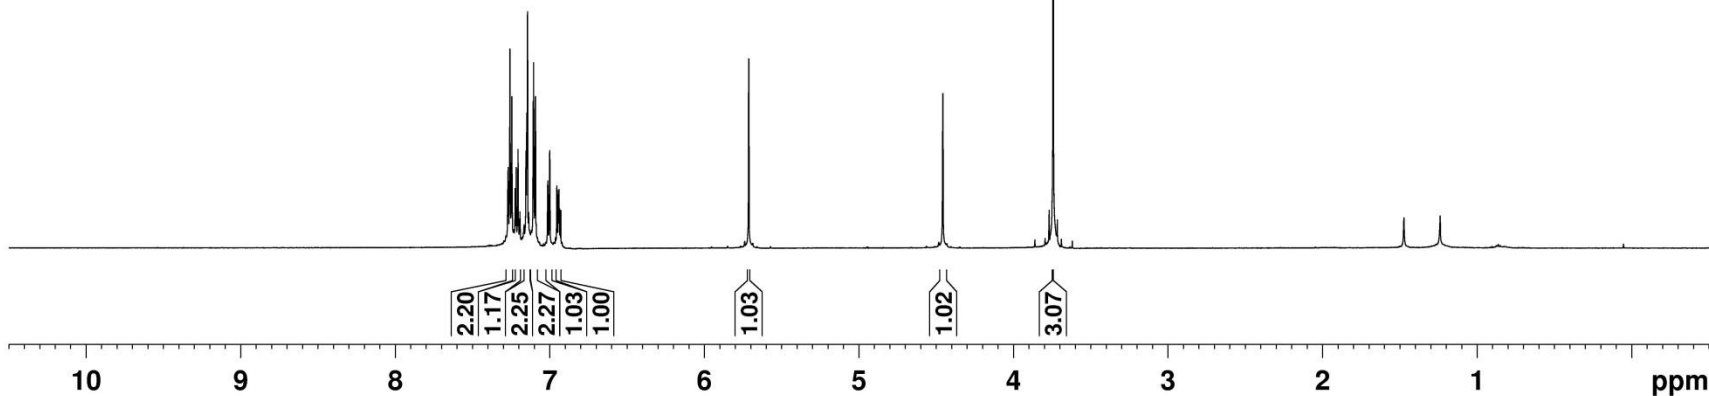



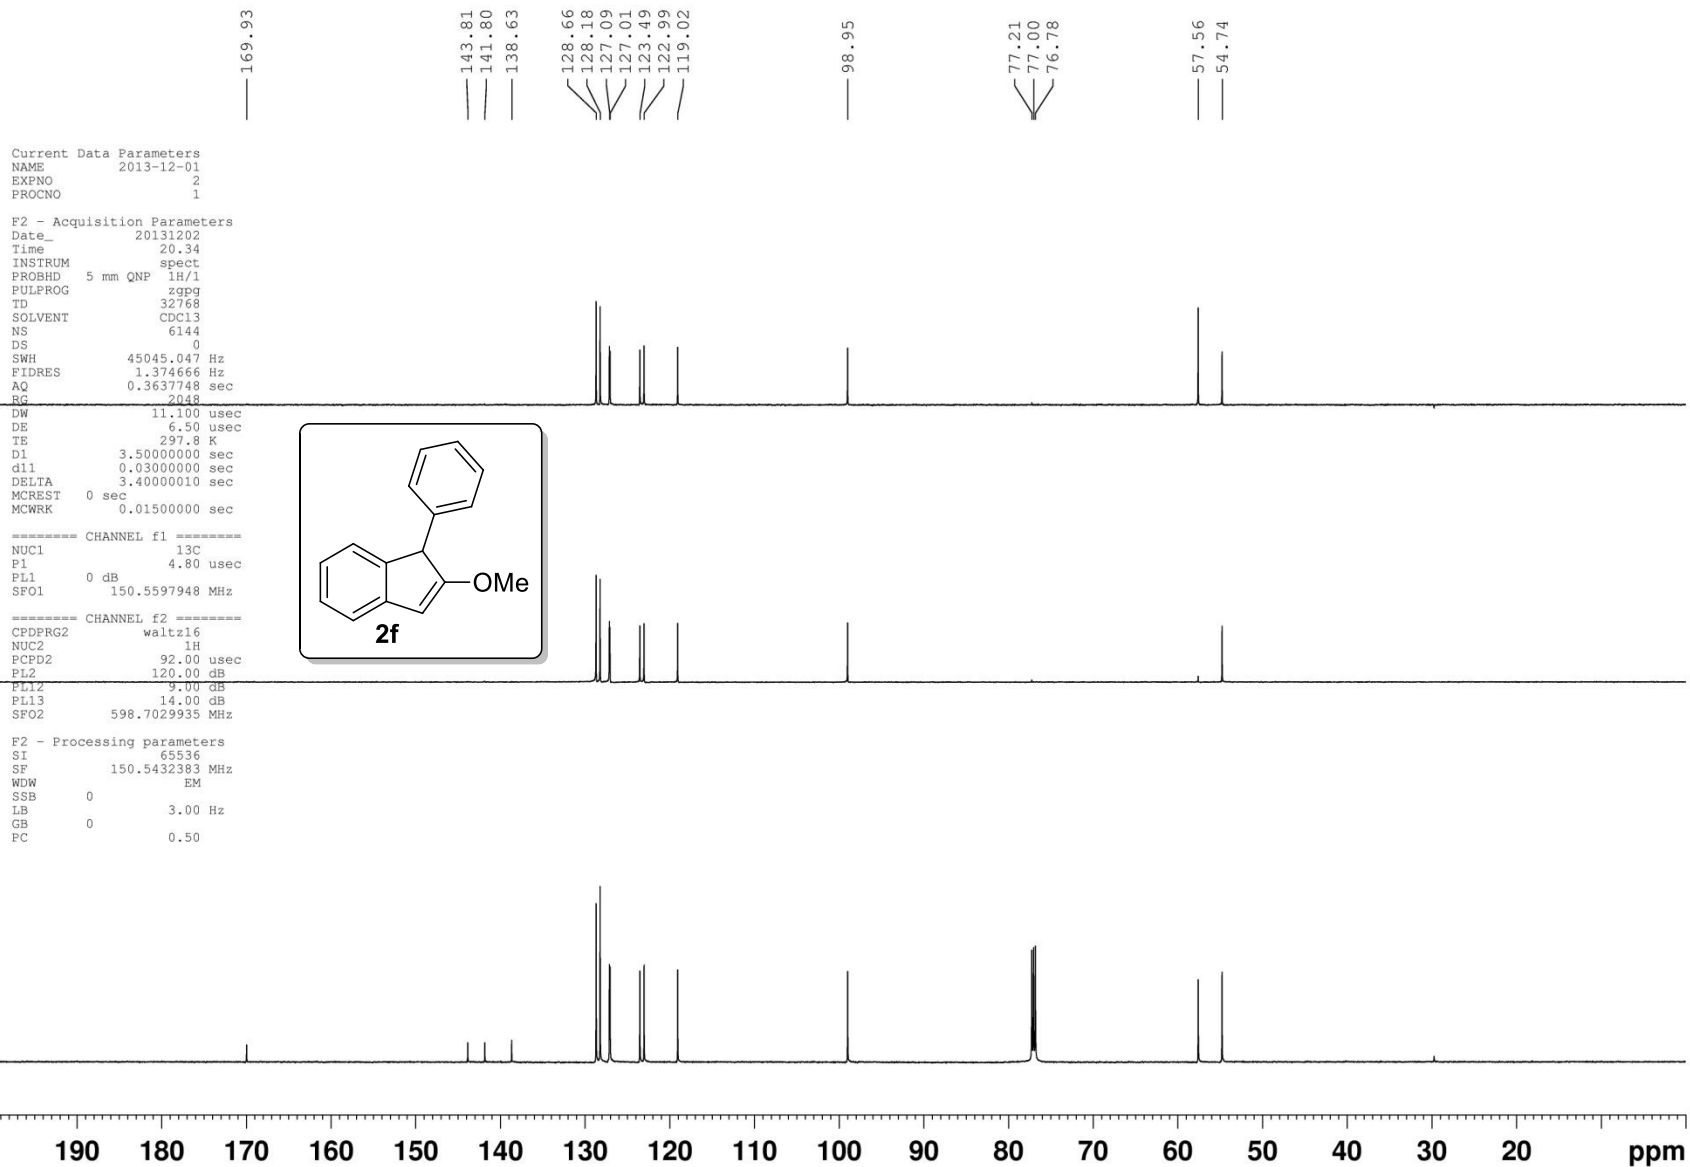

```

Current Data Parameters
NAME      2013-12-01
EXPNO    2
PROCNO   1

F2 - Acquisition Parameters
Date_    20131202
Time     20.34
INSTRUM  spect
PROBHD   5 mm QNP 1H/1
PULPROG  zgpg
TD       32768
SOLVENT  CDCl3
NS       6144
DS       0
SWH      45045.047 Hz
FIDRES   1.374666 Hz
AQ       0.3637748 sec
RG       2048
DW       11.100 usec
DE       6.50 usec
TE       297.8 K
D1       3.5000000 sec
d11      0.03000000 sec
DELTA    3.40000010 sec
MCREST   0 sec
MCWRK    0.01500000 sec

===== CHANNEL f1 =====
NUC1      13C
P1        4.80 usec
PL1       0 dB
SFO1      150.5597948 MHz

===== CHANNEL f2 =====
CPDPRG2   waltz16
NUC2      1H
PCPD2     92.00 usec
PL2       120.00 dB
PL12      9.00 dB
PL13      14.00 dB
SFO2      598.7029935 MHz

F2 - Processing parameters
SI        65536
SF        150.5432383 MHz
WDW       EM
SSB       0
LB        3.00 Hz
GB        0
FC        0.50

```

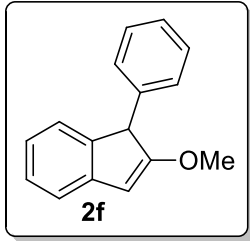

190 180 170 160 150 140 130 120 110 100 90 80 70 60 50 40 30 20 ppm

Current Data Parameters  
 NAME 2013-11-20  
 EXPNO 1  
 PROCNO 1

F2 - Acquisition Parameters  
 Date\_ 20131119  
 Time 11.57  
 INSTRUM spect  
 PROBHD 5 mm QNP 1H/1  
 PULPROG zg  
 TD 32768  
 SOLVENT CDCl3  
 NS 16  
 DS 0  
 SWH 8389.262 Hz  
 FIDRES 0.256020 Hz  
 AQ 1.9530228 sec  
 RG 128  
 DW 59.600 usec  
 DE 6.50 usec  
 TE 298.0 K  
 D1 2.0000000 sec  
 MCREST 0 sec  
 MCWRK 0.01500000 sec

----- CHANNEL f1 -----  
 NUC1 1H  
 P1 10.00 usec  
 PL1 0 dB  
 SFO1 598.7034418 MHz

F2 - Processing parameters  
 SI 32768  
 SF 598.7000250 MHz  
 WDW no  
 SSB 0  
 LB 0 Hz  
 GB 0  
 PC 1.00

7.294  
 7.292  
 7.289  
 7.280  
 7.278  
 7.270  
 7.268  
 7.264  
 7.241  
 7.240  
 7.238  
 7.236  
 7.229  
 7.226  
 7.222  
 7.215  
 7.213  
 7.211  
 7.123  
 7.121  
 7.118  
 7.109  
 7.104  
 7.054  
 7.042  
 6.982  
 6.981  
 6.980  
 6.970  
 6.969  
 6.968  
 6.845  
 5.699

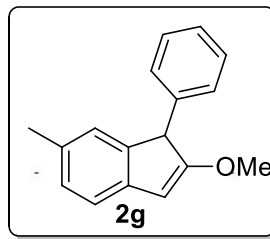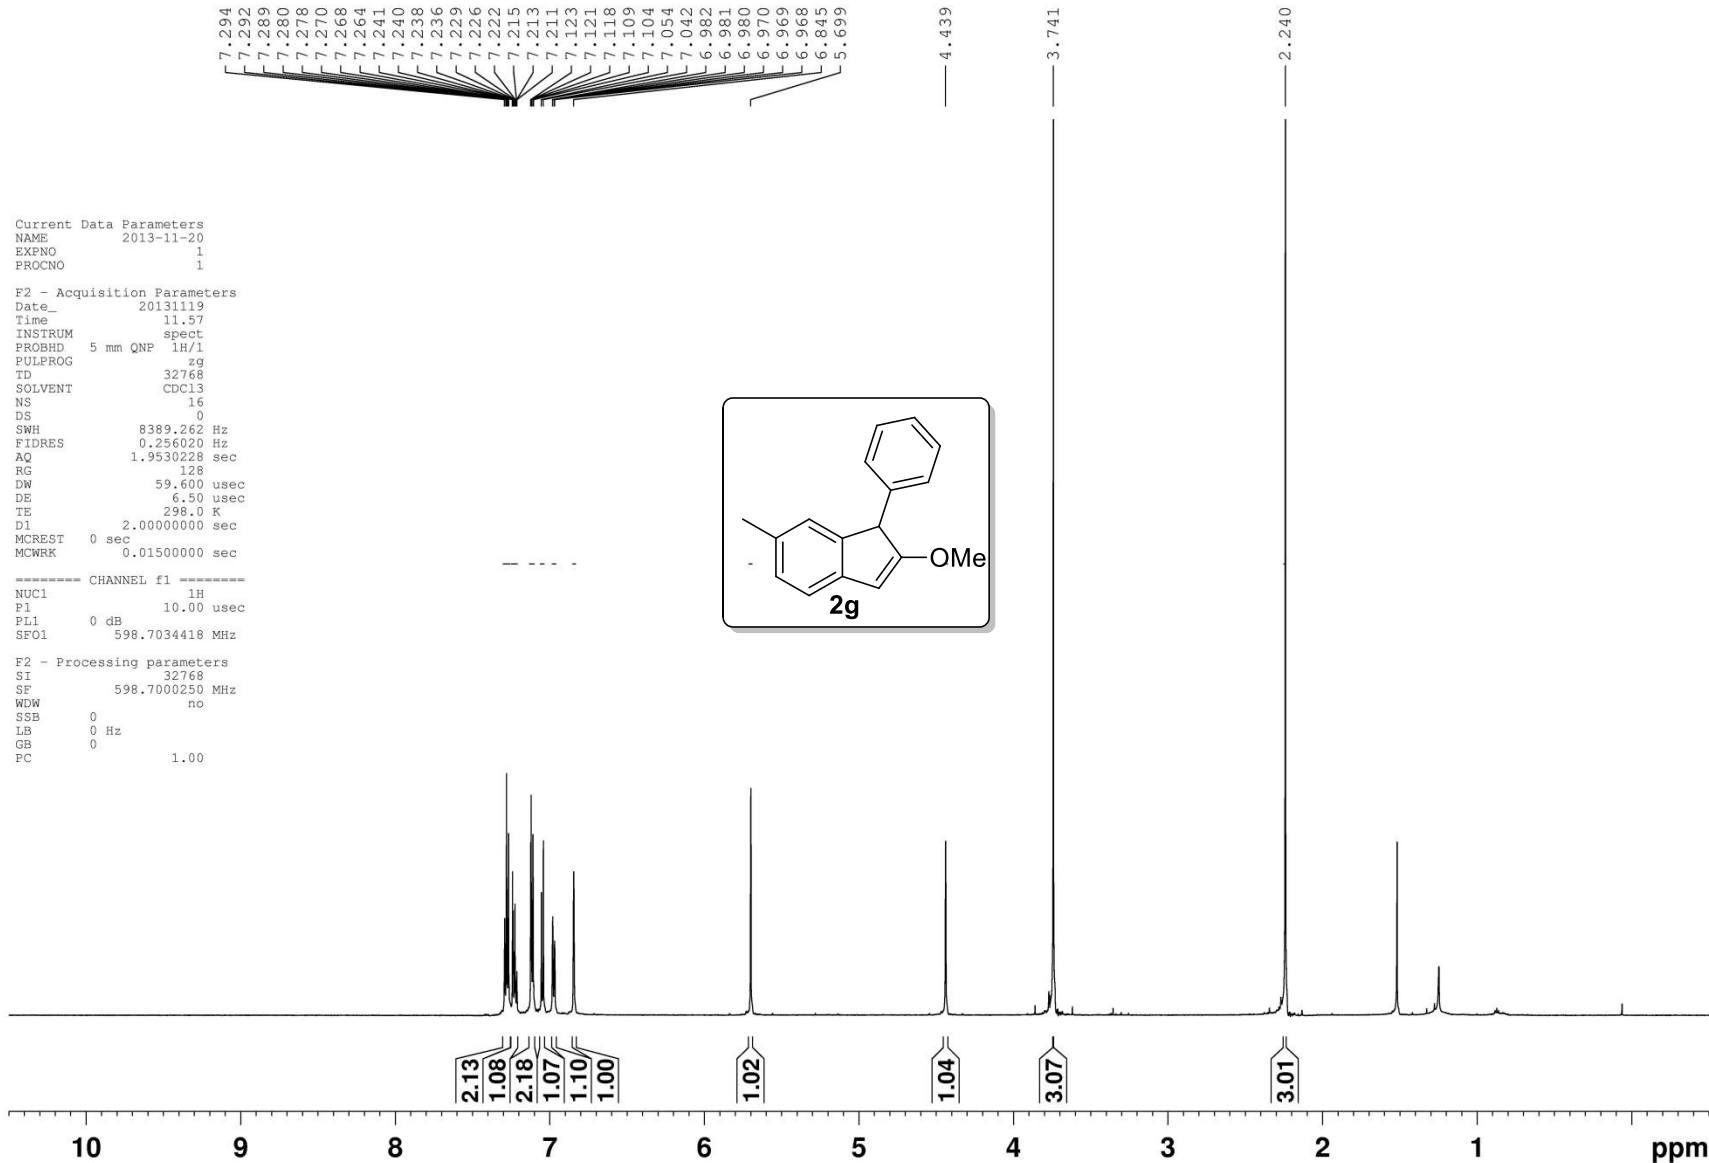

Current Data Parameters  
NAME 2013-11-20  
EXPNO 2  
PROCNO 1

F2 - Acquisition Parameters  
Date\_ 20131119  
Time 12.16  
INSTRUM spect  
PROBHD 5 mm QNP 1H/1  
PULPROG zgpg  
TD 32768  
SOLVENT CDCl3  
NS 281  
DS 0  
SWH 45045.047 Hz  
FIDRES 1.374666 Hz  
AQ 0.3637748 sec

DE 11.100 usec  
TE 298.2 K  
D1 3.50000000 sec  
d11 0.03000000 sec  
DELTA 3.40000010 sec  
MCREST 0 sec  
MCWRK 0.01500000 sec

===== CHANNEL f1 =====  
NUC1 13C  
P1 4.80 usec  
PL1 0 dB  
SFO1 150.5597948 MHz

===== CHANNEL f2 =====  
CPDPRG2 waltz16  
NUC2 1H  
PCPD2 92.00 usec  
PL2 120.00 dB  
PL12 9.00 dB  
PL13 14.00 dB  
SFO2 598.7029935 MHz

F2 - Processing parameters  
SI 65536  
SF 150.5432370 MHz  
WDW EM  
SSB 0  
LB 3.00 Hz  
GB 0  
PC 0.50

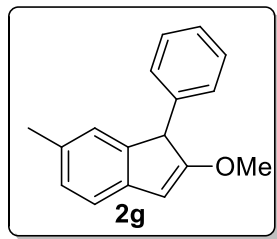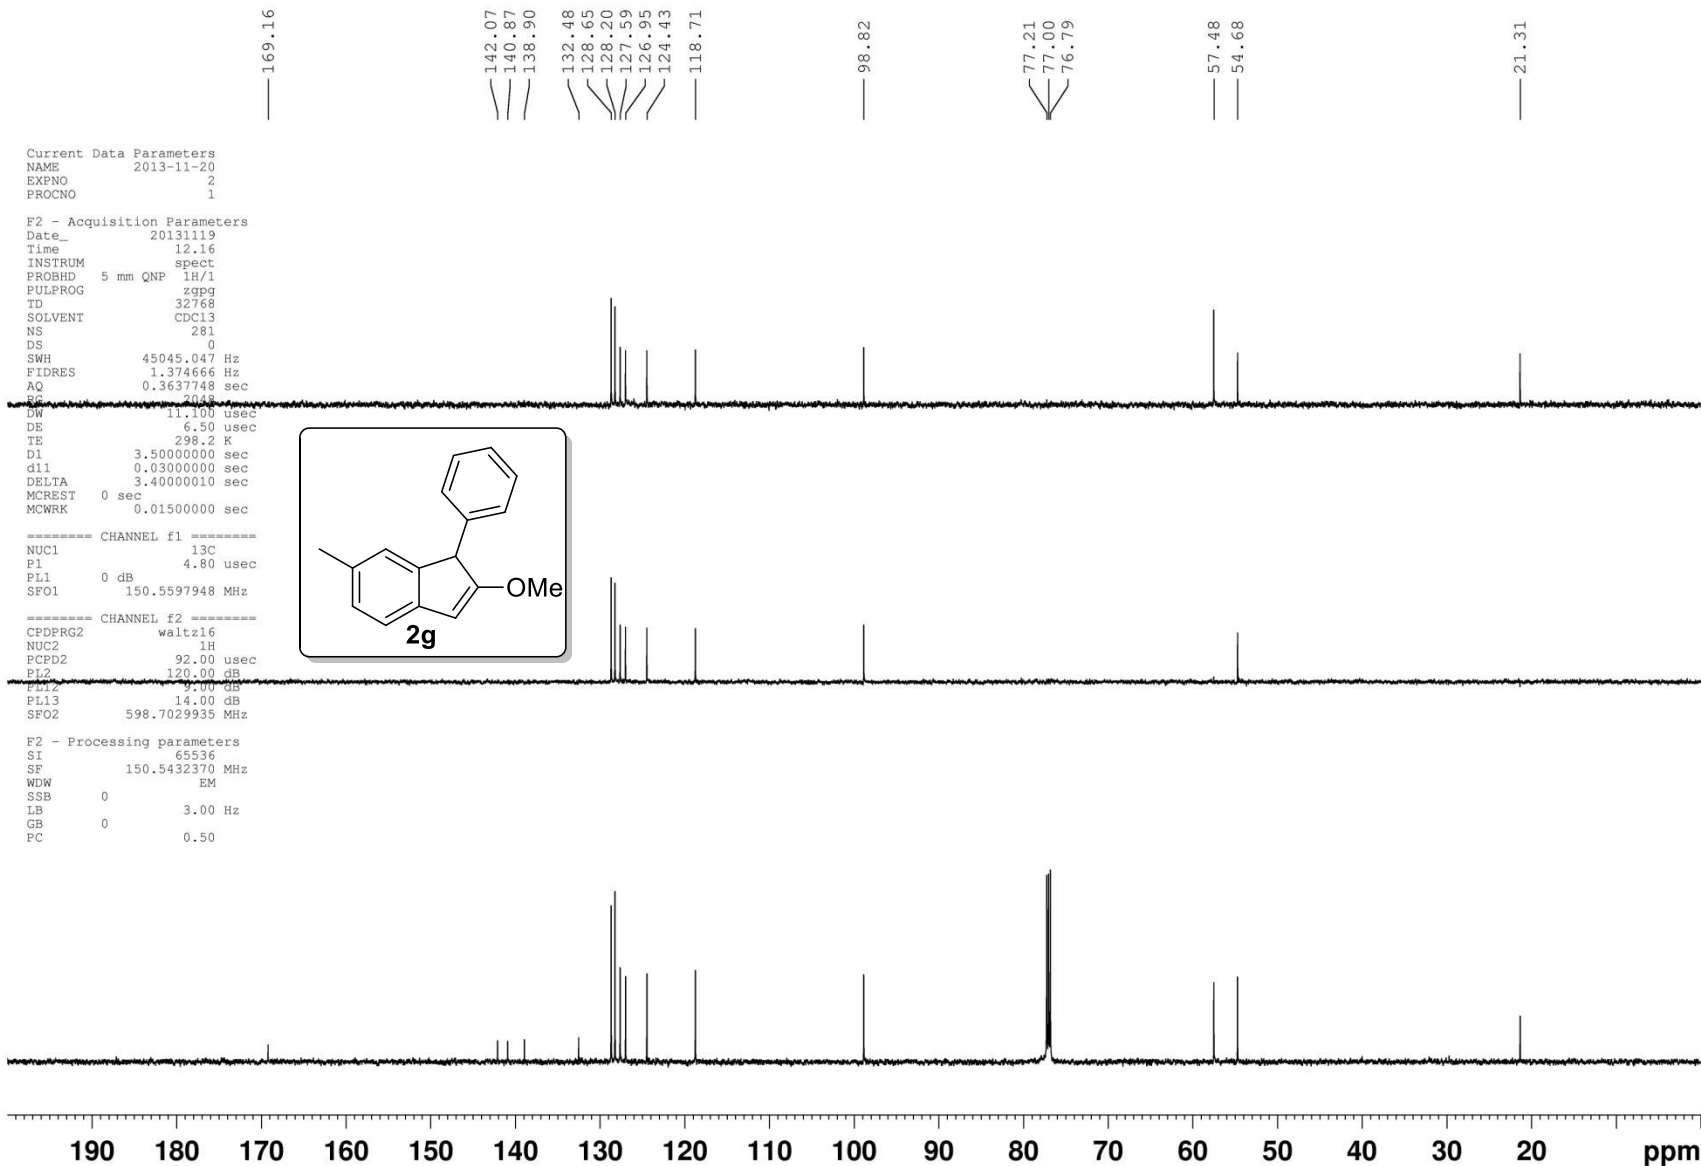

```

Current Data Parameters
NAME      2013-12-11
EXPNO    1
PROCNO   1

F2 - Acquisition Parameters
Date_    20131211
Time     12.08
INSTRUM  spect
PROBHD   5 mm QNP 1H/1
PULPROG  zg
TD        32768
SOLVENT  CDCl3
NS        16
DS         0
SWH      8382.222 Hz
FIDRES   0.255805 Hz
AQ       1.9546632 sec
RG        512
DW       59.650 usec
DE       6.50 usec
TE       295.7 K
D1       2.0000000 sec
MCREST   0 sec
MCWRK    0.0150000 sec

----- CHANNEL f1 -----
NUC1      1H
P1        10.00 usec
PL1       0 dB
SFO1     598.7029935 MHz

F2 - Processing parameters
SI        32768
SF       598.7000257 MHz
WDW       no
SSB       0
LB        0 Hz
GB        0
PC        1.00

```

7.294  
7.292  
7.289  
7.280  
7.278  
7.268  
7.241  
7.238  
7.236  
7.229  
7.226  
7.222  
7.214  
7.213  
7.211  
7.201  
7.200  
7.198  
7.197  
7.134  
7.132  
7.121  
7.119  
7.093  
7.080  
7.079  
7.071  
7.069  
5.682

4.458

3.732

1.231

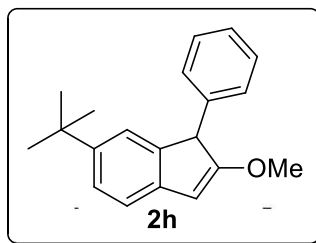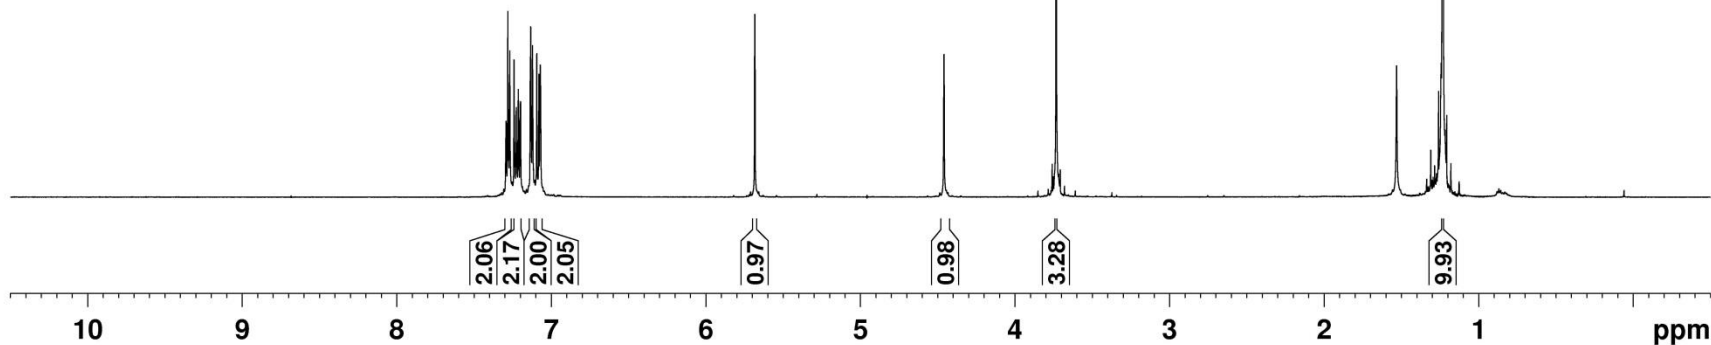

— 169.50  
 — 146.11  
 — 141.54  
 — 141.08  
 — 138.93  
 — 128.59  
 — 128.32  
 — 126.89  
 — 123.80  
 — 120.78  
 — 118.38  
 — 98.47  
 — 77.21  
 — 77.00  
 — 76.79  
 — 57.49  
 — 54.85  
 — 34.53  
 — 31.58

Current Data Parameters  
 NAME 2013-12-11  
 EXPNO 2  
 PROCNO 1

F2 - Acquisition Parameters  
 Date\_ 20131211  
 Time 12.25  
 INSTRUM spect  
 PROBHD 5 mm QNP 1H/1  
 PULPROG zgpg  
 TD 32768  
 SOLVENT CDCl3  
 NS 300  
 DS 0  
 SWH 45045.047 Hz  
 FIDRES 1.374666 Hz  
 AQ 0.3637748 sec

DE 11.100 usec  
 TE 296.9 K  
 D1 3.50000000 sec  
 d11 0.03000000 sec  
 DELTA 3.40000010 sec  
 MCREST 0 sec  
 MCWRK 0.01500000 sec

===== CHANNEL f1 =====  
 NUC1 13C  
 P1 4.80 usec  
 PL1 0 dB  
 SFO1 150.5597948 MHz

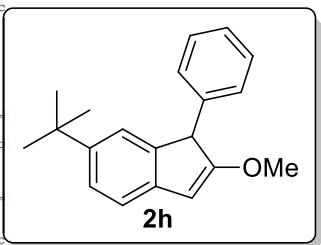

===== CHANNEL f2 =====  
 CPDPRG2 waltz16  
 NUC2 1H  
 PCPD2 92.00 usec  
 PL2 120.00 dB  
 PL12 9.00 dB  
 PL13 14.00 dB  
 SFO2 598.7029935 MHz

F2 - Processing parameters  
 SI 65536  
 SF 150.5432376 MHz  
 WDW EM  
 SSB 0  
 LB 3.00 Hz  
 GB 0  
 PC 0.50

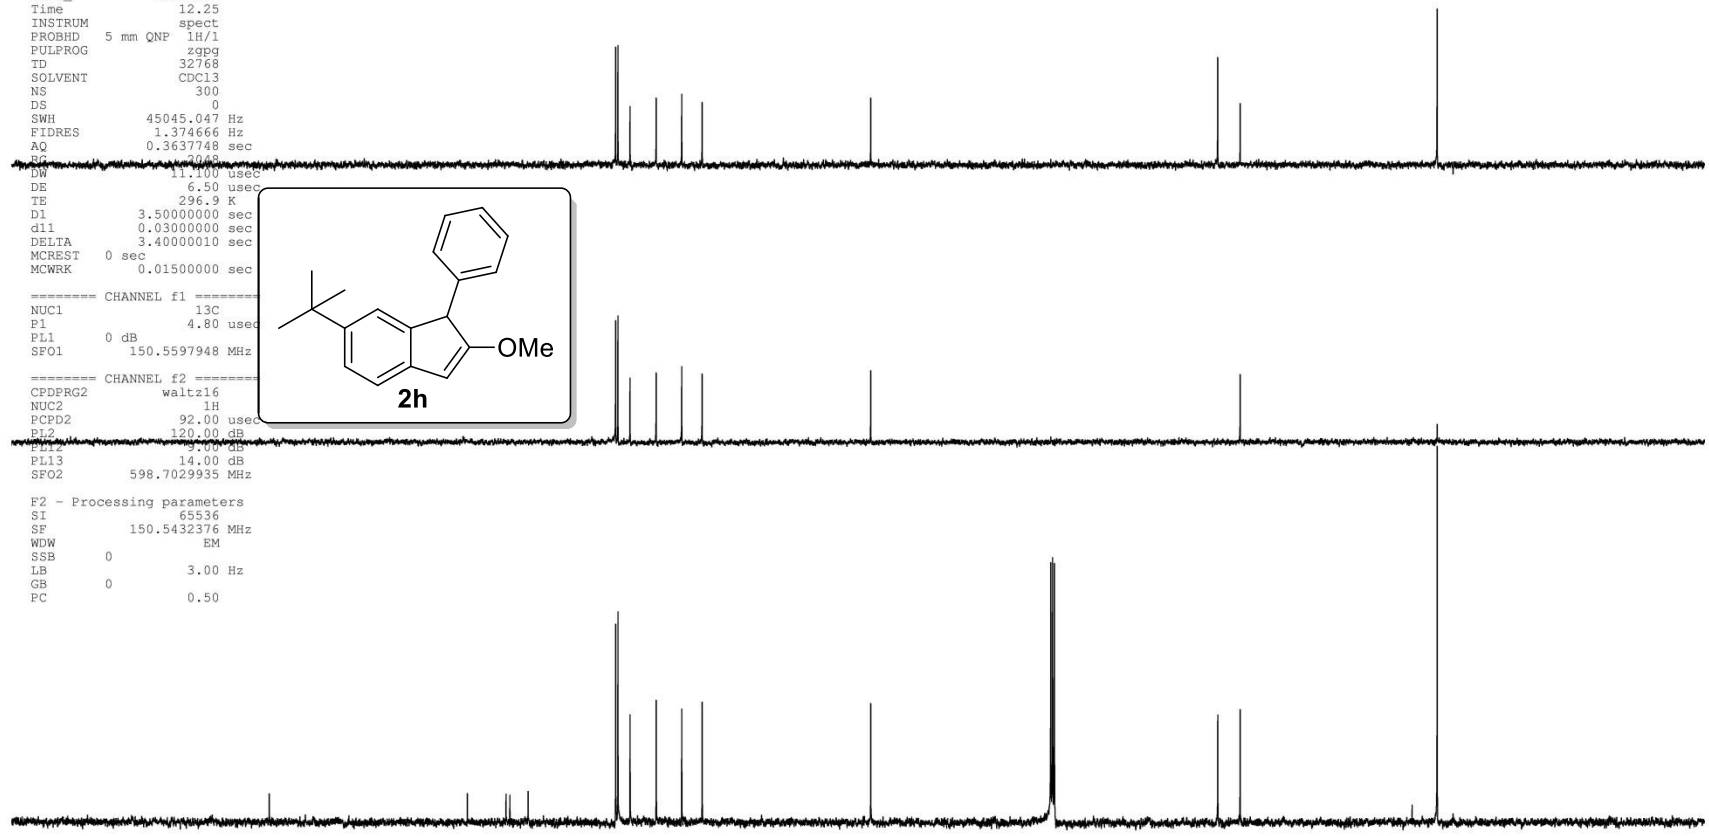

190 180 170 160 150 140 130 120 110 100 90 80 70 60 50 40 30 20 ppm

```

Current Data Parameters
NAME      2014-03-25
EXPNO    1
PROCNO   1

F2 - Acquisition Parameters
Date_    20140321
Time     10.31
INSTRUM  spect
PROBHD   5 mm QNP 1H/1
PULPROG  zg
TD        32768
SOLVENT  CDCl3
NS        16
DS        0
SWH      9578.544 Hz
FIDRES   0.292314 Hz
AQ        1.7105396 sec
RG         128
DW        52.200 usec
DE         6.50 usec
TE        293.4 K
D1        2.0000000 sec
MCREST    0 sec
MCRWRK   0.0150000 sec

===== CHANNEL f1 =====
NUC1      1H
P1        10.00 usec
PL1       3.00 dB
SFO1     598.7029935 MHz

F2 - Processing parameters
SI        32768
SF        598.7000250 MHz
WDW       no
SSB       0
LB        0 Hz
GB        0
PC        1.00

```

7.298  
7.296  
7.293  
7.287  
7.284  
7.282  
7.274  
7.271  
7.245  
7.242  
7.240  
7.234  
7.230  
7.226  
7.220  
7.218  
7.216  
7.133  
7.131  
7.128  
7.119  
7.118  
7.101  
6.928  
6.915  
6.801  
6.800  
6.789  
6.787  
5.1697

4.456

3.760

2.342

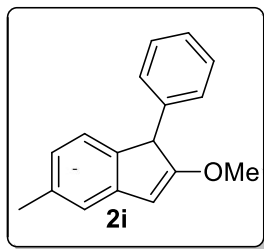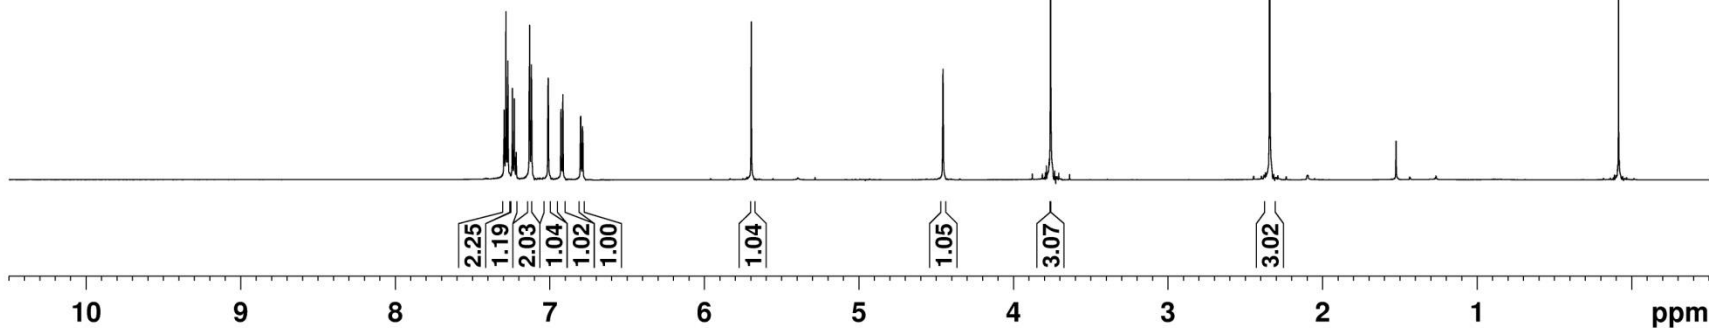

Current Data Parameters  
NAME 2014-03-25  
EXPNO 2  
PROCNO 1

F2 - Acquisition Parameters  
Date\_ 20140321  
Time 10.37  
INSTRUM spect  
PROBHD 5 mm QNP 1H/1  
PULPROG zgpg  
TD 32768  
SOLVENT CDCl3  
NS 200  
DS 0  
SWH 45045.047 Hz  
FIDRES 1.374666 Hz  
AQ 0.3637748 sec  
RG 2048

DW 11.100 usec  
DE 6.50 usec  
TE 295.0 K  
D1 3.50000000 sec  
d11 0.03000000 sec  
DELTA 3.40000010 sec  
MCREST 0 sec  
MCWRK 0.01500000 sec

===== CHANNEL f1 =====  
NUC1 13C  
P1 4.80 usec  
PL1 0 dB  
SFO1 150.5597948 MHz

===== CHANNEL f2 =====  
CPDPRG2 waltz16  
NUC2 1H  
PCPD2 92.00 usec  
PL2 120.00 dB  
PL12 9.00 dB  
PL13 14.00 dB  
SFO2 598.7029935 MHz

F2 - Processing parameters  
SI 65536  
SF 150.5432431 MHz  
WDW EM  
SSB 0  
LB 3.00 Hz  
GB 0  
PC 0.50

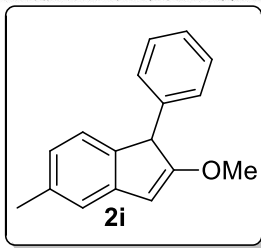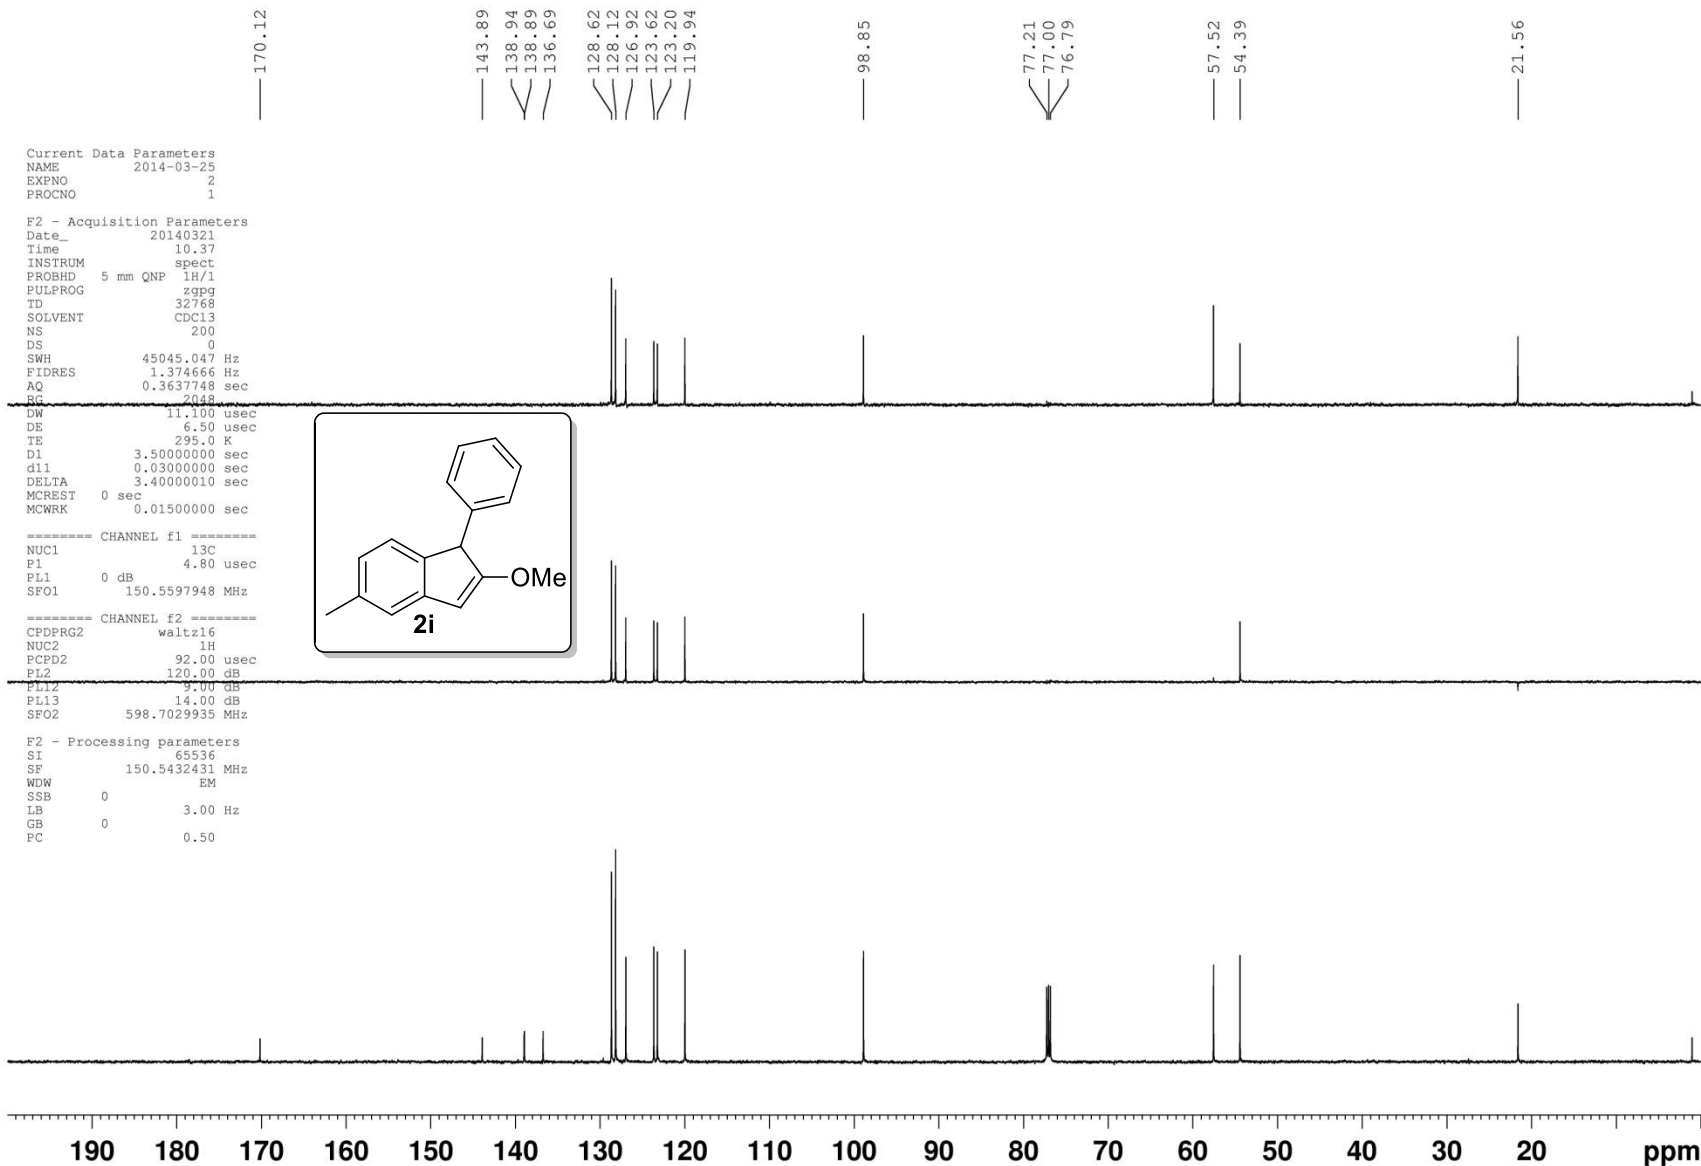

```

Current Data Parameters
NAME      2013-12-28
EXPNO    1
PROCNO   1

F2 - Acquisition Parameters
Date_    20131225
Time     12.30
INSTRUM  spect
PROBHD   5 mm QNP 1H/1
PULPROG  zg
TD        32768
SOLVENT  CDCl3
NS        16
DS        0
SWH      8382.229 Hz
FIDRES   0.255805 Hz
AQ        1.9546613 sec
RG         128
DW        59.650 usec
DE         6.50 usec
TE        294.2 K
D1         2.0000000 sec
MCREST    0 sec
MCWRK     0.01500000 sec

----- CHANNEL f1 -----
NUC1      1H
P1        10.00 usec
PL1       0 dB
SFO1     598.7029935 MHz

F2 - Processing parameters
SI        32768
SF        598.7000264 MHz
WDW       no
SSB       0
LB        0 Hz
GB        0
PC        1.00

```

7.283  
7.282  
7.279  
7.270  
7.259  
7.257  
7.240  
7.237  
7.226  
7.224  
7.222  
7.210  
7.207  
7.202  
7.200  
7.198  
7.131  
7.129  
7.125  
7.117  
6.994  
6.991  
6.981  
6.978  
6.954  
6.941  
5.717

4.441

3.749

1.306

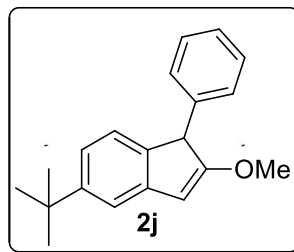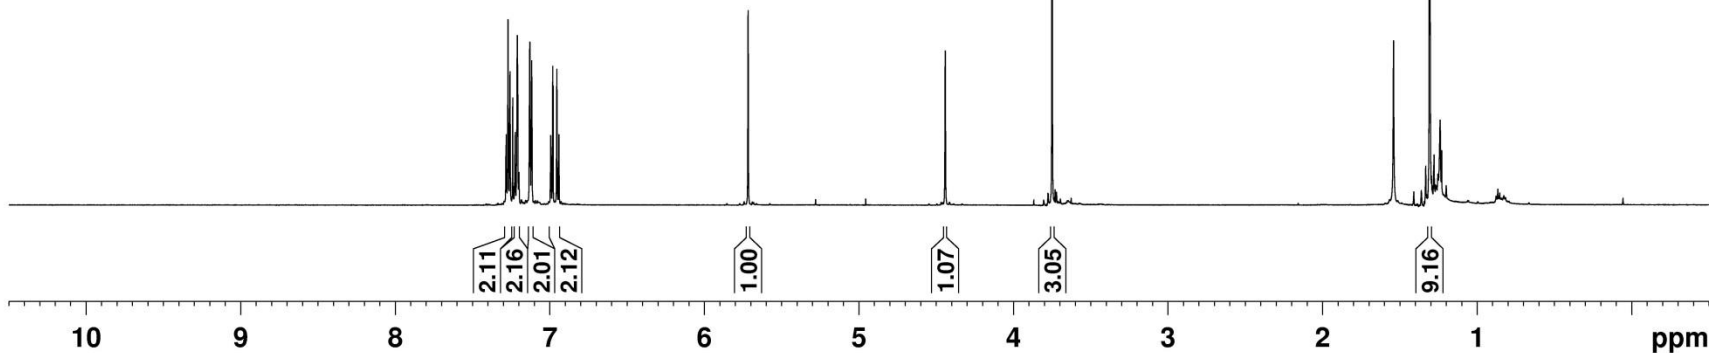



— 169.86  
 — 150.19  
 — 143.50  
 — 138.87  
 — 138.83  
 — 128.61  
 — 128.18  
 — 126.92  
 — 122.88  
 — 119.93  
 — 116.33  
 — 99.22  
 — 77.21  
 — 77.00  
 — 76.79  
 — 57.53  
 — 54.39  
 — 34.67  
 — 31.58

Current Data Parameters  
 NAME 2013-12-28  
 EXPNO 2  
 PROCNO 1

F2 - Acquisition Parameters  
 Date\_ 20131225  
 Time 12.35  
 INSTRUM spect  
 PROBHD 5 mm QNP 1H/1  
 PULPROG zgpg  
 TD 32768  
 SOLVENT CDCl3  
 NS 336  
 DS 0  
 SWH 45045.047 Hz  
 FIDRES 1.374666 Hz  
 AQ 0.3637748 sec

DW 11.100 usec  
 DE 6.50 usec  
 TE 295.6 K  
 D1 3.50000000 sec  
 d11 0.03000000 sec  
 DELTA 3.40000010 sec  
 MCREST 0 sec  
 MCWRK 0.01500000 sec

===== CHANNEL f1 =====  
 NUC1 13C  
 P1 4.80 usec  
 PL1 0 dB  
 SFO1 150.5597948 MHz

===== CHANNEL f2 =====  
 CPDPRG2 waltz16  
 NUC2 1H  
 PCPD2 92.00 usec  
 PL2 120.00 dB  
 PL12 19.00 dB  
 PL13 14.00 dB  
 SFO2 598.7029935 MHz

F2 - Processing parameters  
 SI 65536  
 SF 150.5432383 MHz  
 WDW EM  
 SSB 0  
 LB 3.00 Hz  
 GB 0  
 PC 0.50

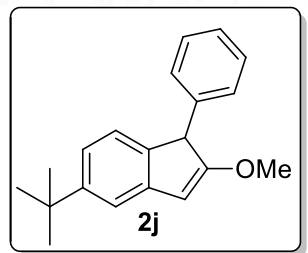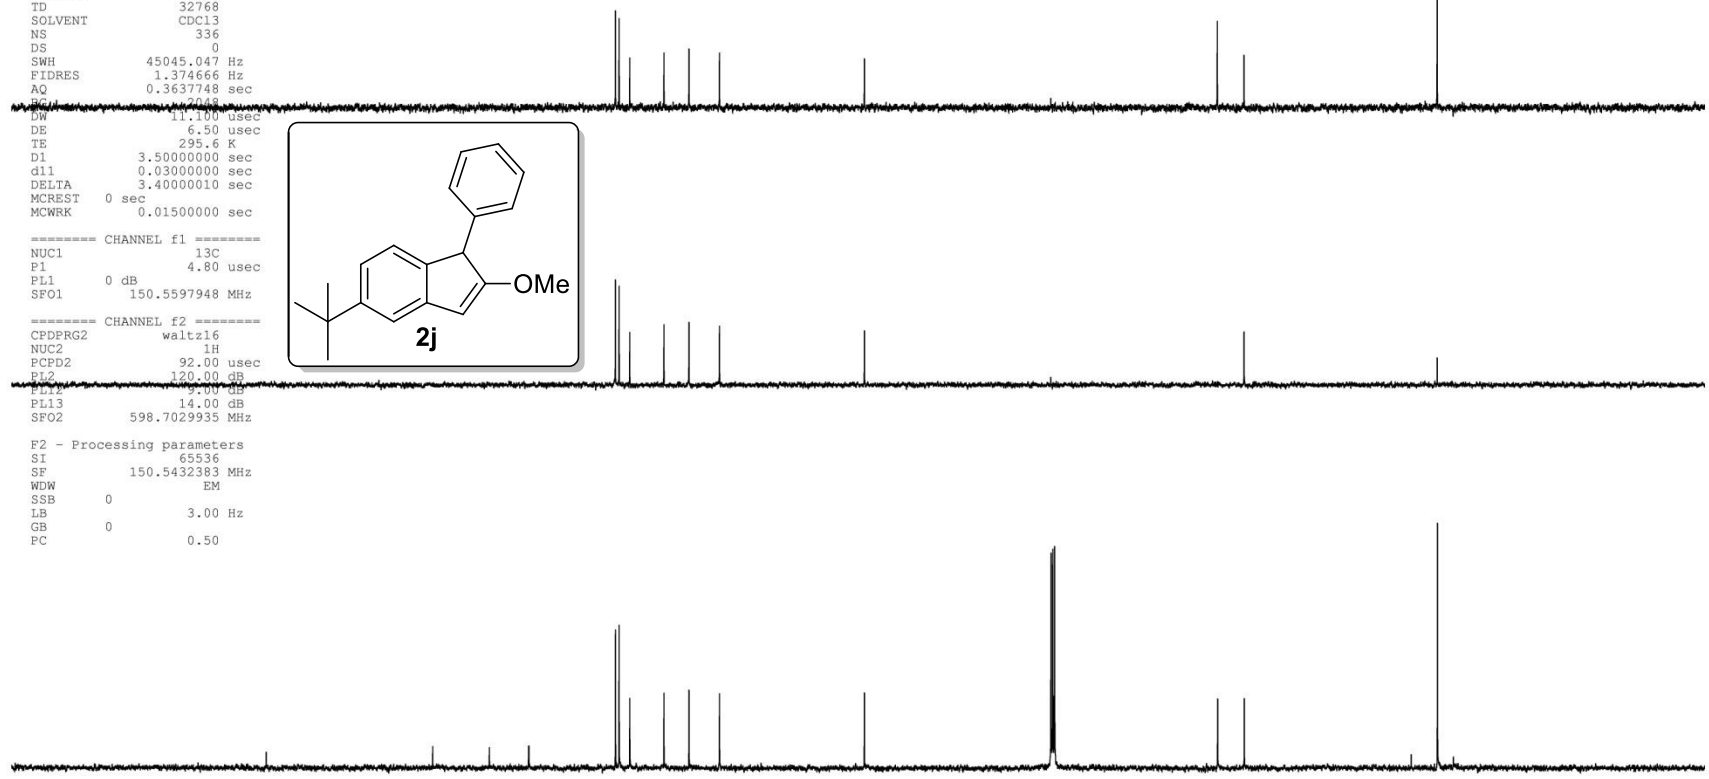

190 180 170 160 150 140 130 120 110 100 90 80 70 60 50 40 30 20 ppm

Current Data Parameters  
NAME 2014-04-23  
EXPNO 1  
PROCNO 1

F2 - Acquisition Parameters  
Date\_ 20140422  
Time 12.31  
INSTRUM spect  
PROBHD 5 mm QNP 1H/1  
PULPROG zg  
TD 32768  
SOLVENT CDCl3  
NS 16  
DS 0  
SWH 9578.544 Hz  
FIDRES 0.292314 Hz  
AQ 1.7105396 sec  
RG 32  
DW 52.200 usec  
DE 6.50 usec  
TE 293.5 K  
D1 2.0000000 sec  
MCREST 0 sec  
MCWRK 0.01500000 sec

----- CHANNEL f1 -----  
NUC1 1H  
P1 10.00 usec  
PL1 3.00 dB  
SFO1 598.7035922 Mhz

F2 - Processing parameters  
SI 32768  
SF 598.7000260 Mhz  
WDW no  
SSB 0  
LB 0 Hz  
GB 0  
PC 1.00

7.240  
7.152  
7.148  
7.138  
7.135  
7.122  
7.109  
7.072  
7.058  
7.003  
6.999  
6.989

5.689

4.433

3.755

2.325

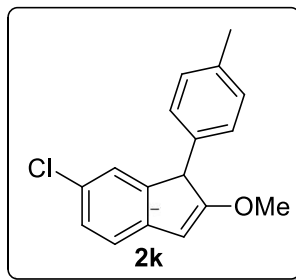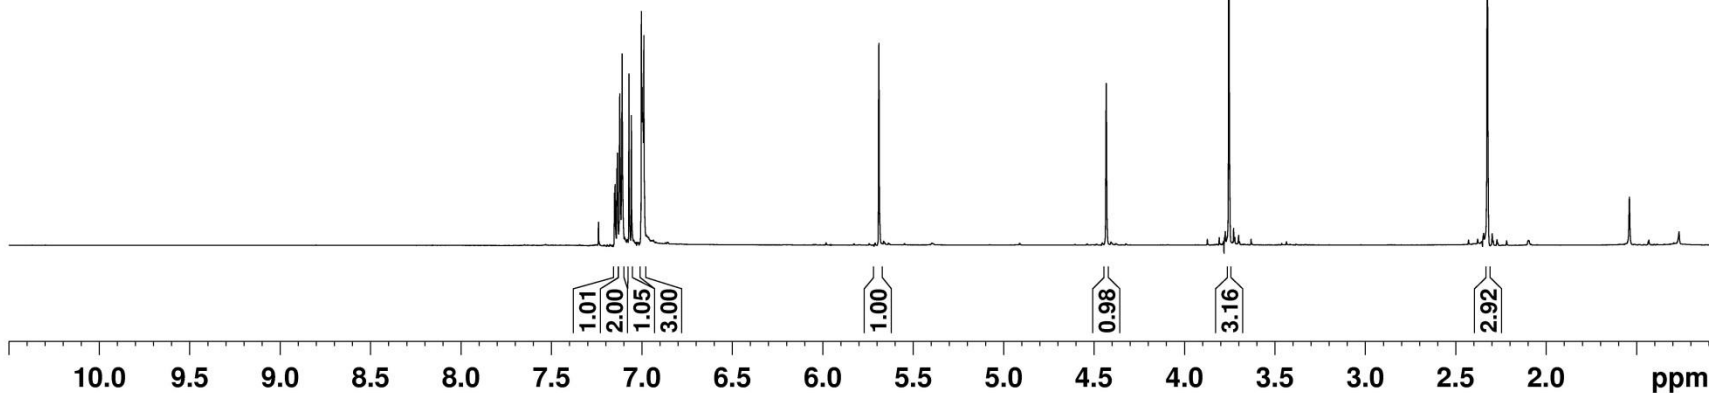

Current Data Parameters  
NAME Hao-ph-Me-I-1  
EXPNO 2  
PROCNO 1

F2 - Acquisition Parameters  
Date\_ 20140421  
Time 21.32  
INSTRUM spect  
PROBHD 5 mm QNP 1H/1  
PULPROG zgpg  
TD 32768  
SOLVENT CDC13  
NS 100  
DS 0  
SWH 45045.047 Hz  
FIDRES 1.374666 Hz  
AQ 0.3637748 sec  
RG 2048

DW 11.100 usec  
DE 6.50 usec  
TE 293.2 K  
D1 3.50000000 sec  
d11 0.03000000 sec  
DELTA 3.40000010 sec  
MCREST 0.00000000 sec  
MCWRK 0.01500000 sec

===== CHANNEL f1 =====  
NUC1 13C  
P1 4.80 usec  
PL1 0.00 dB  
SFO1 150.5597948 MHz

===== CHANNEL f2 =====  
CPDPRG2 waltz16  
NUC2 1H  
PCPD2 92.00 usec  
PL2 120.00 dB  
PL12 9.00 dB  
PL13 14.00 dB  
SFO2 598.7029935 MHz

F2 - Processing parameters  
SI 65536  
SF 150.5432459 MHz  
WDW EM  
SSB 0  
LB 3.00 Hz  
GB 0  
PC 1.00

1D NMR plot parameters  
CX 20.00 cm  
CY 4.00 cm  
F1P 200.000 ppm  
F1 30108.65 Hz  
F2P -10.000 ppm  
F2 -1505.43 Hz

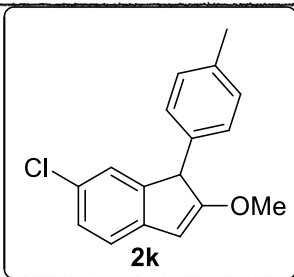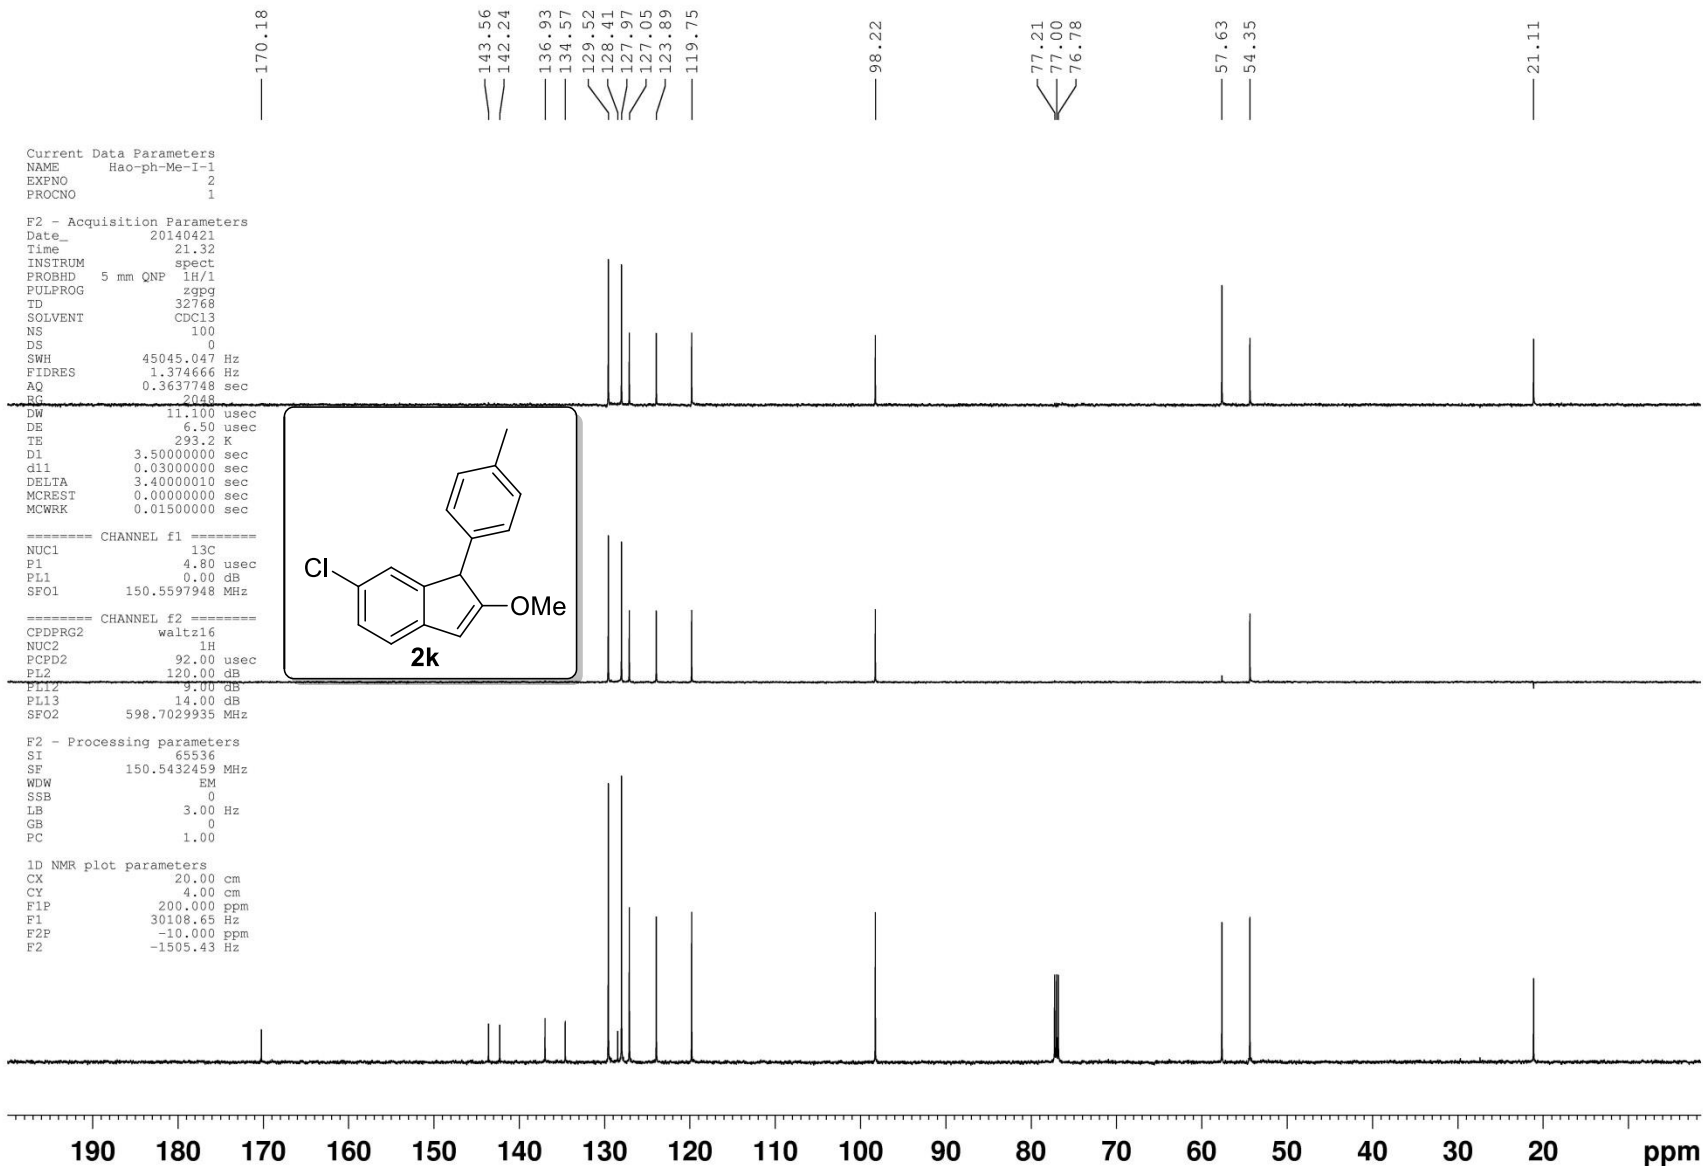

Current Data Parameters  
NAME 0424.fid  
EXPNO 1  
PROCNO 1  
F2 - Processing parameters  
SI 16384  
SF 499.8069107 MHz  
WDW EM  
SSB 0  
LB 0.30 Hz  
GB 0  
PC 1.00

7.257  
7.240  
7.149  
7.146  
7.132  
7.129  
7.061  
7.045  
7.018  
7.001  
6.950

5.675

4.408

3.738

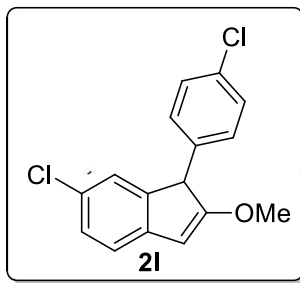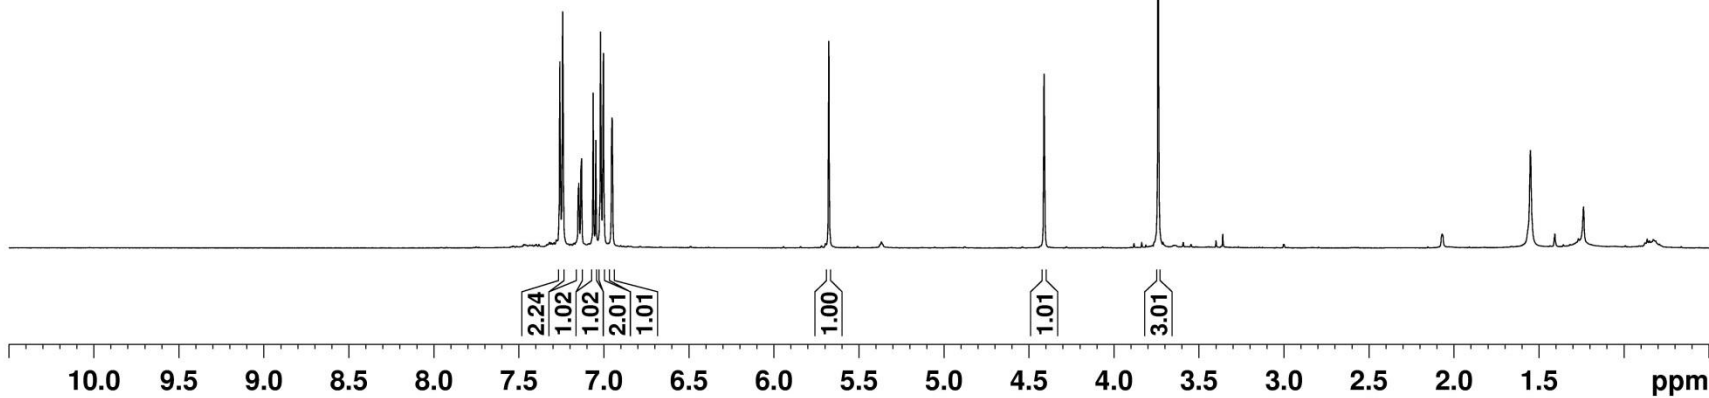

Current Data Parameters  
NAME 0424.fid  
EXPNO 2  
PROCNO 1

F2 - Processing parameters  
SI 65536  
SF 125.6794359 MHz  
WDW EM  
SSB 0  
LB 0 0.30 Hz  
GB 0  
PC 1.00

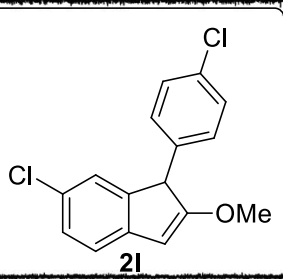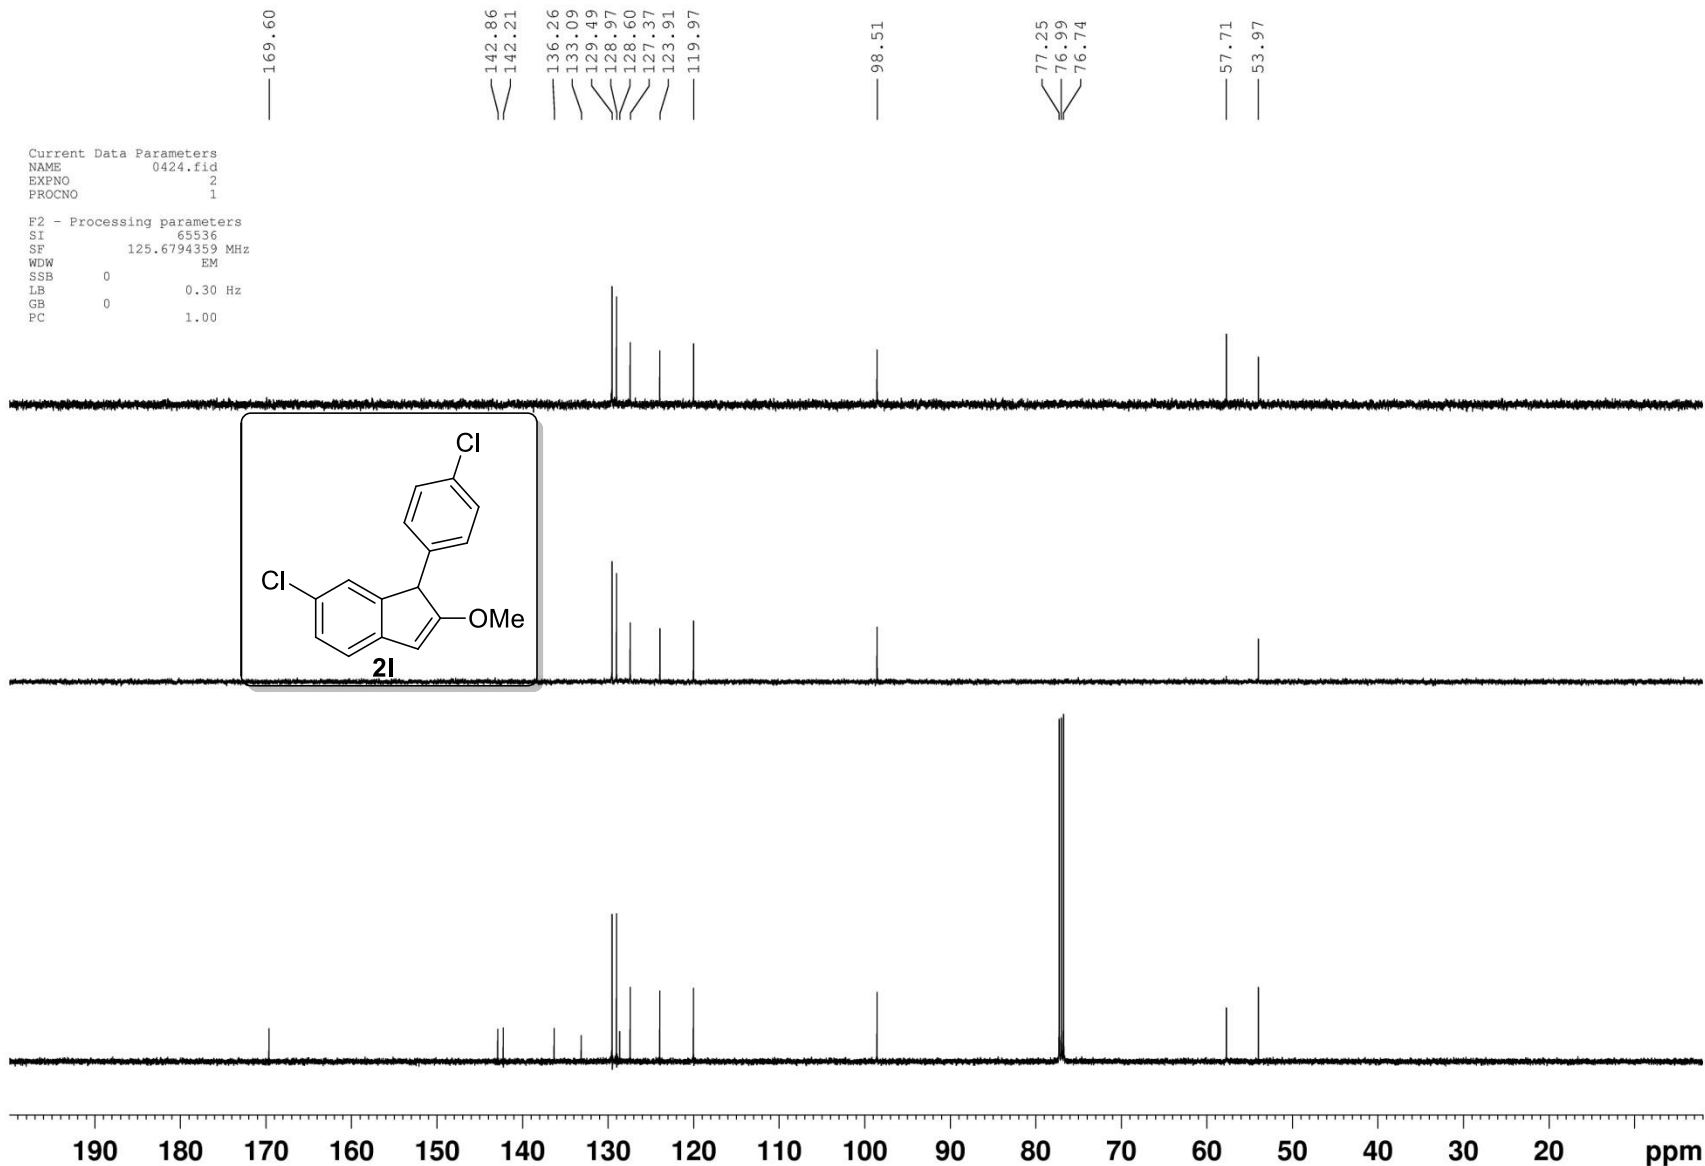

Current Data Parameters  
 NAME 2013-10-30  
 EXPNO 1  
 PROCNO 1

F2 - Acquisition Parameters  
 Date\_ 20131101  
 Time 12.31  
 INSTRUM spect  
 PROBHD 5 mm QNP 1H/1  
 PULPROG zg  
 TD 32768  
 SOLVENT CDCl3  
 NS 16  
 DS 0  
 SWH 8389.262 Hz  
 FIDRES 0.256020 Hz  
 AQ 1.9530228 sec  
 RG 512  
 DW 59.600 usec  
 DE 6.50 usec  
 TE 297.3 K  
 D1 2.0000000 sec  
 MCREST 0 sec  
 MCWRK 0.01500000 sec

----- CHANNEL f1 -----  
 NUC1 1H  
 P1 10.00 usec  
 PL1 0 dB  
 SFO1 598.7029935 MHz

F2 - Processing parameters  
 SI 32768  
 SF 598.7000261 MHz  
 WDW no  
 SSB 0  
 LB 0 Hz  
 GB 0  
 PC 1.00

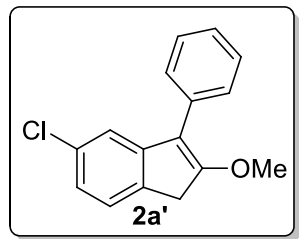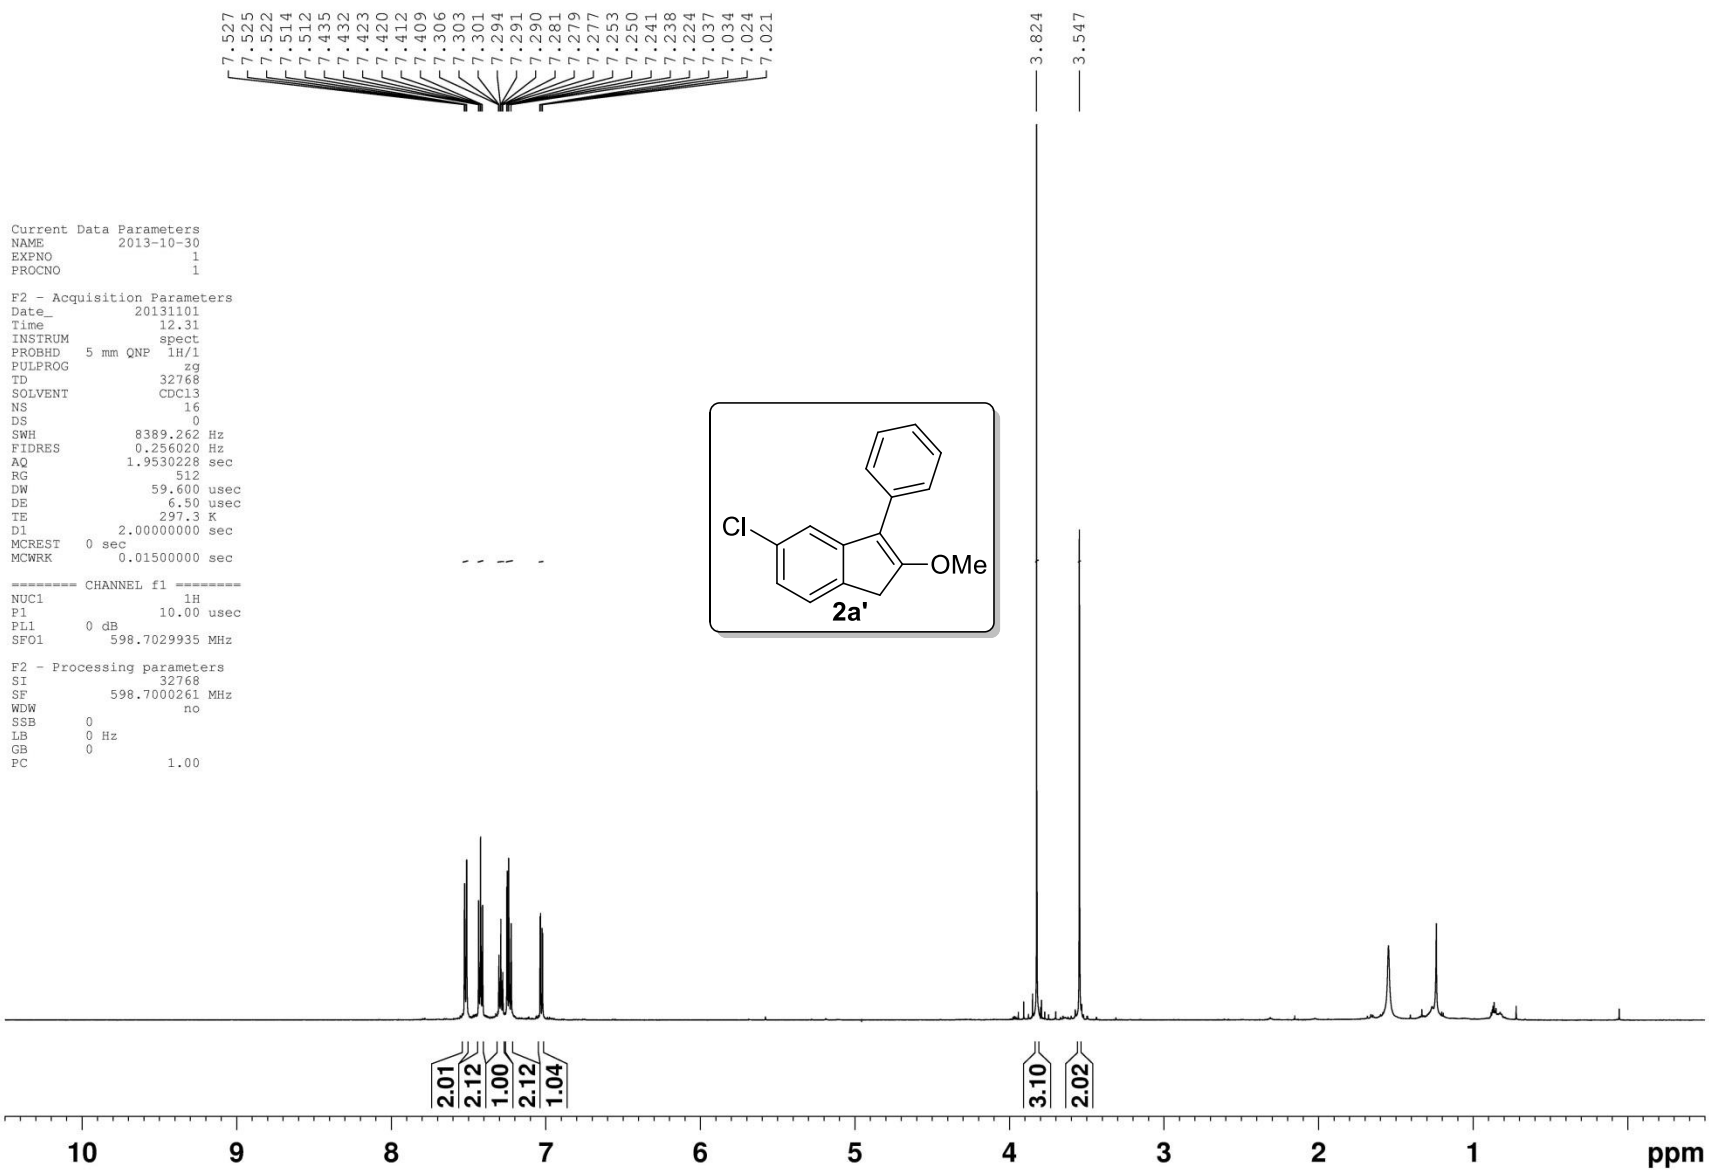

Current Data Parameters  
NAME Hao-131101  
EXPNO 2  
PROCNO 1

F2 - Acquisition Parameters  
Date\_ 20131031  
Time 20.34  
INSTRUM spect  
PROBHD 5 mm QNP 1H/1  
PULPROG zgpg  
TD 32768  
SOLVENT CDC13  
NS 649  
DS 0  
SWH 45045.047 Hz  
FIDRES 1.374666 Hz  
AQ 0.3637748 sec  
RG 11.100 usec  
DE 6.50 usec  
TE 297.9 K  
D1 3.5000000 sec  
d11 0.0300000 sec  
DELTA 3.4000010 sec  
MCREST 0.0000000 sec  
MCWRK 0.0150000 sec

===== CHANNEL f1 =====  
NUC1 13C  
P1 4.80 usec  
PL1 0.00 dB  
SFO1 150.5597948 MHz

===== CHANNEL f2 =====  
CPDPRG2 waltz16  
NUC2 1H  
PCPD2 92.00 usec  
PL2 120.00 dB  
PL12 9.00 dB  
PL13 14.00 dB  
SFO2 598.7029935 MHz

F2 - Processing parameters  
SI 65536  
SF 150.5432369 MHz  
WDW EM  
SSB 0  
LB 3.00 Hz  
GB 0  
PC 0.50

1D NMR plot parameters  
CX 20.00 cm  
CY 4.00 cm  
F1P 135.000 ppm  
F1 20323.34 Hz  
F2P 115.000 ppm  
F2 17312.47 Hz

161.65

147.11

133.55

133.13

132.81

128.71

128.42

126.88

124.23

122.47

118.54

116.43

77.21

77.00

76.79

57.89

34.75

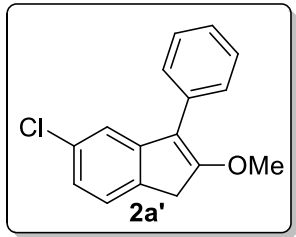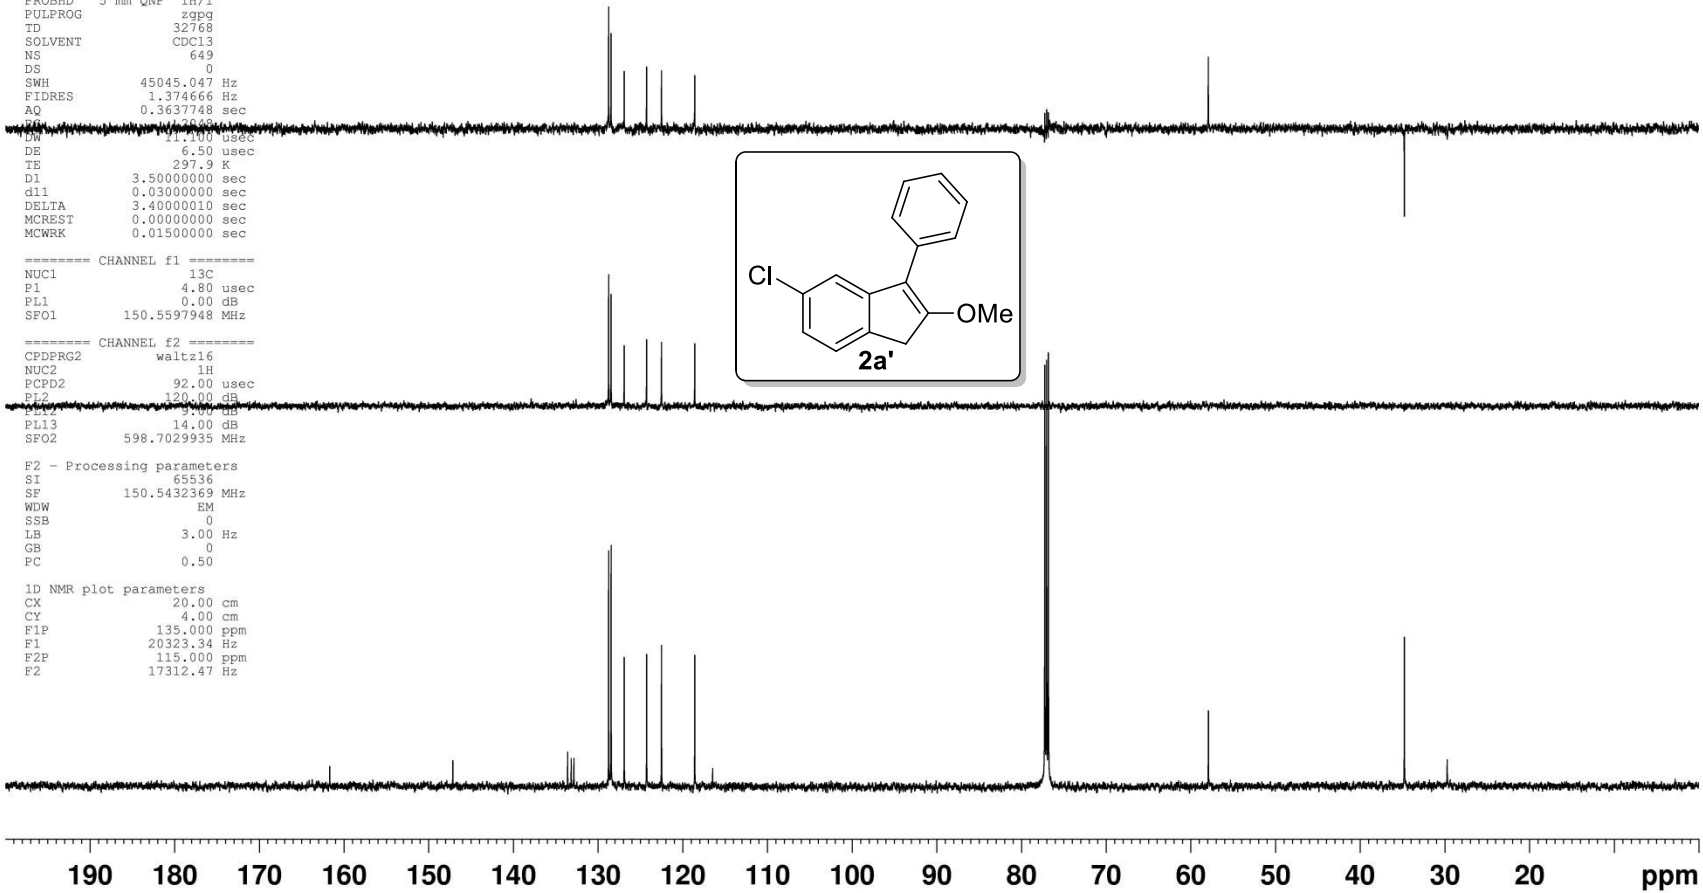

Current Data Parameters  
 NAME 2013-11-26  
 EXPNO 1  
 PROCNO 1

F2 - Acquisition Parameters  
 Date\_ 20131126  
 Time 12.57  
 INSTRUM spect  
 PROBHD 5 mm QNP 1H/1  
 PULPROG zg  
 TD 41106  
 SOLVENT CDC13  
 NS 16  
 DS 0  
 SWH 8389.262 Hz  
 FIDRES 0.204088 Hz  
 AQ 2.4499676 sec  
 RG 512  
 DW 59.600 usec  
 DE 6.50 usec  
 TE 297.0 K  
 D1 2.0000000 sec  
 MCREST 0 sec  
 MCWRK 0.0150000 sec

----- CHANNEL f1 -----  
 NUC1 1H  
 P1 8.90 usec  
 PL1 3.00 dB  
 SFO1 598.7035922 Mhz

F2 - Processing parameters  
 SI 32768  
 SF 598.7000255 Mhz  
 WDW no  
 SSB 0  
 LB 0 Hz  
 GB 0  
 PC 1.00

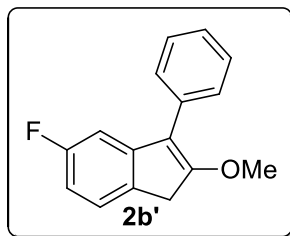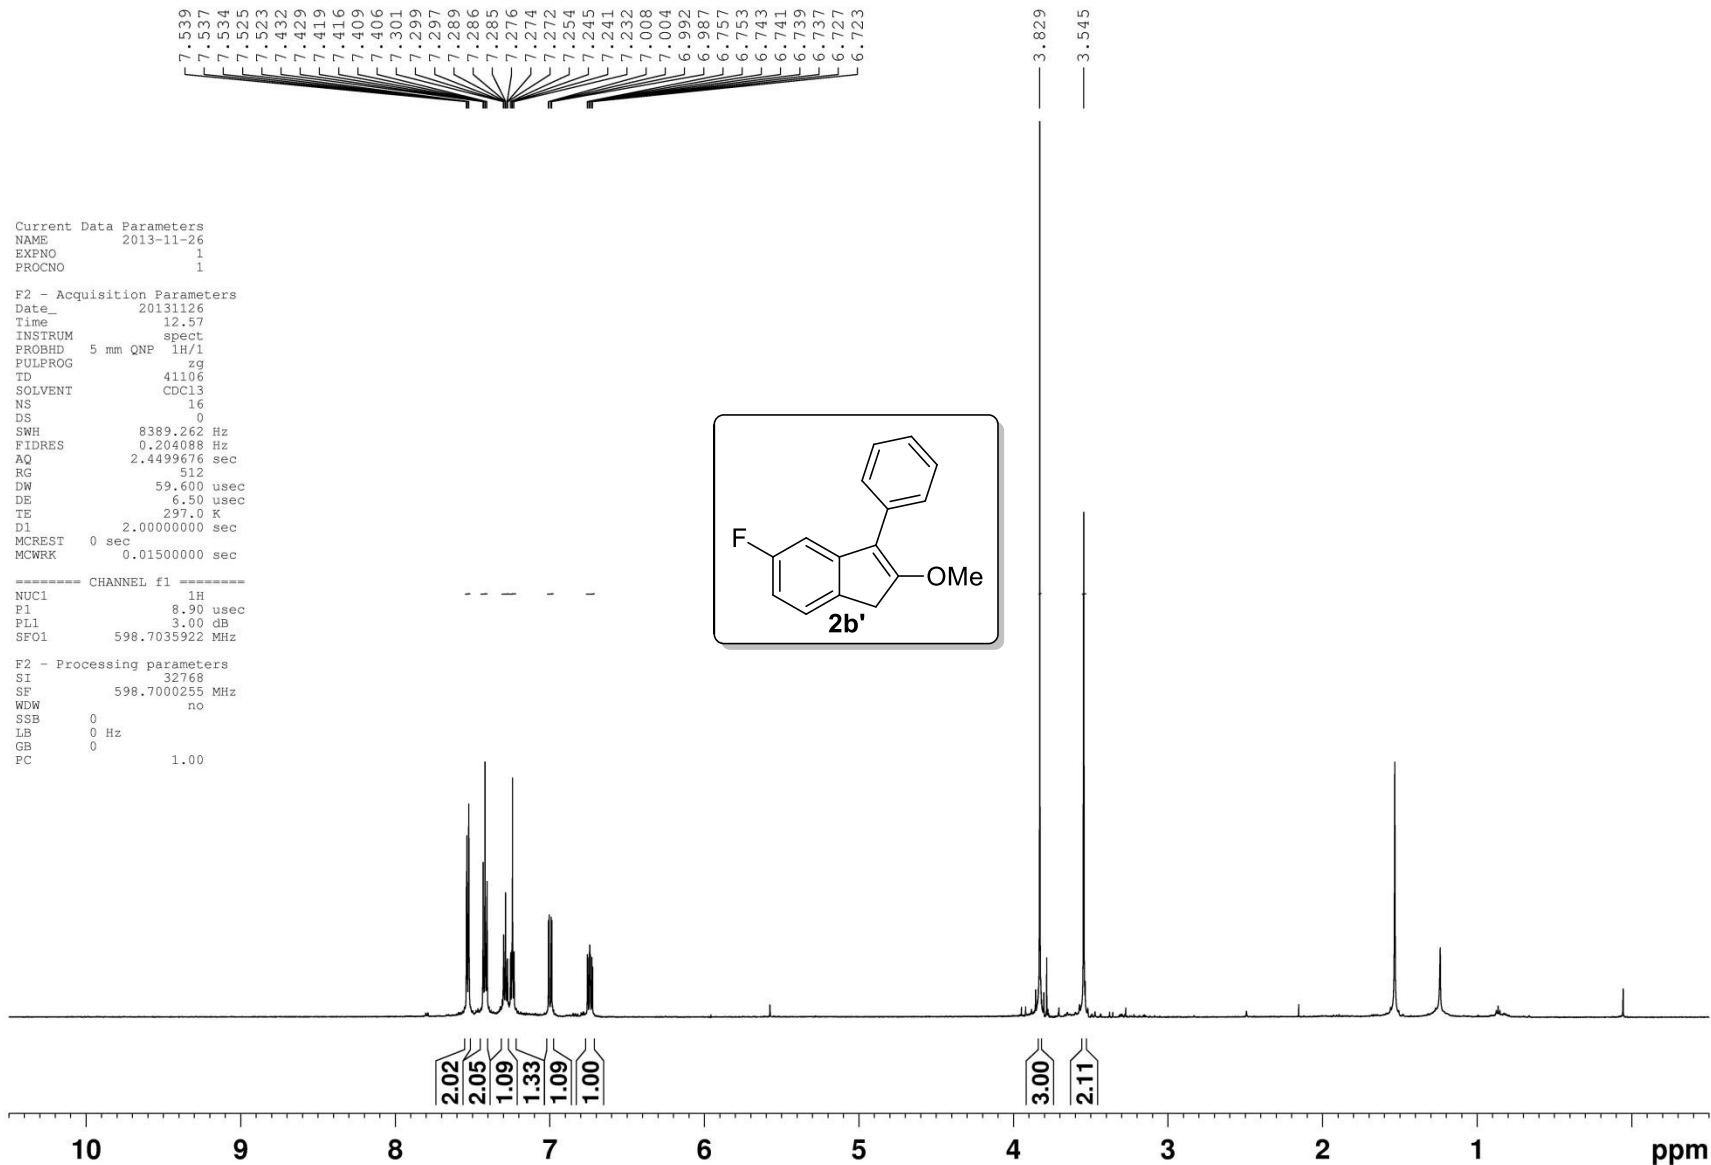



163.56  
162.10  
161.96

147.34  
147.28

133.27  
130.57  
128.63  
128.40  
126.82  
124.09  
124.03

116.67

109.04  
108.89  
105.94  
105.78

77.21  
77.00  
76.79

57.82

34.55

Current Data Parameters  
NAME 2013-11-26  
EXPNO 2  
PROCNO 1

F2 - Acquisition Parameters

Date\_ 20131126  
Time 13.03  
INSTRUM spect  
PROBHD 5 mm QNP 1H/1  
PULPROG zgpg  
TD 32768  
SOLVENT CDCl3  
NS 4096  
DS 0  
SWH 45045.047 Hz  
FIDRES 1.374666 Hz  
AQ 0.3637748 sec  
RG 2048  
DW 11.100 usec  
DE 6.50 usec  
TE 298.0 K  
D1 3.5000000 sec  
d11 0.0300000 sec  
DELTA 3.4000010 sec  
MCREST 0 sec  
MCWRK 0.0150000 sec

----- CHANNEL f1 -----  
NUC1 13C  
P1 4.80 usec  
PL1 0 dB  
SFO1 150.5597948 MHz

----- CHANNEL f2 -----  
CPDPRG2 waltz16  
NUC2 1H  
PCPD2 92.00 usec  
PL2 120.00 dB  
PL12 9.00 dB  
PL13 14.00 dB  
SFO2 598.7029935 MHz

F2 - Processing parameters  
SI 65536  
SF 150.5432356 MHz  
WDW EM  
SSB 0  
LB 3.00 Hz  
GB 0  
PC 0.50

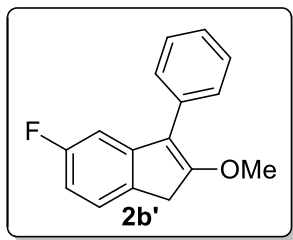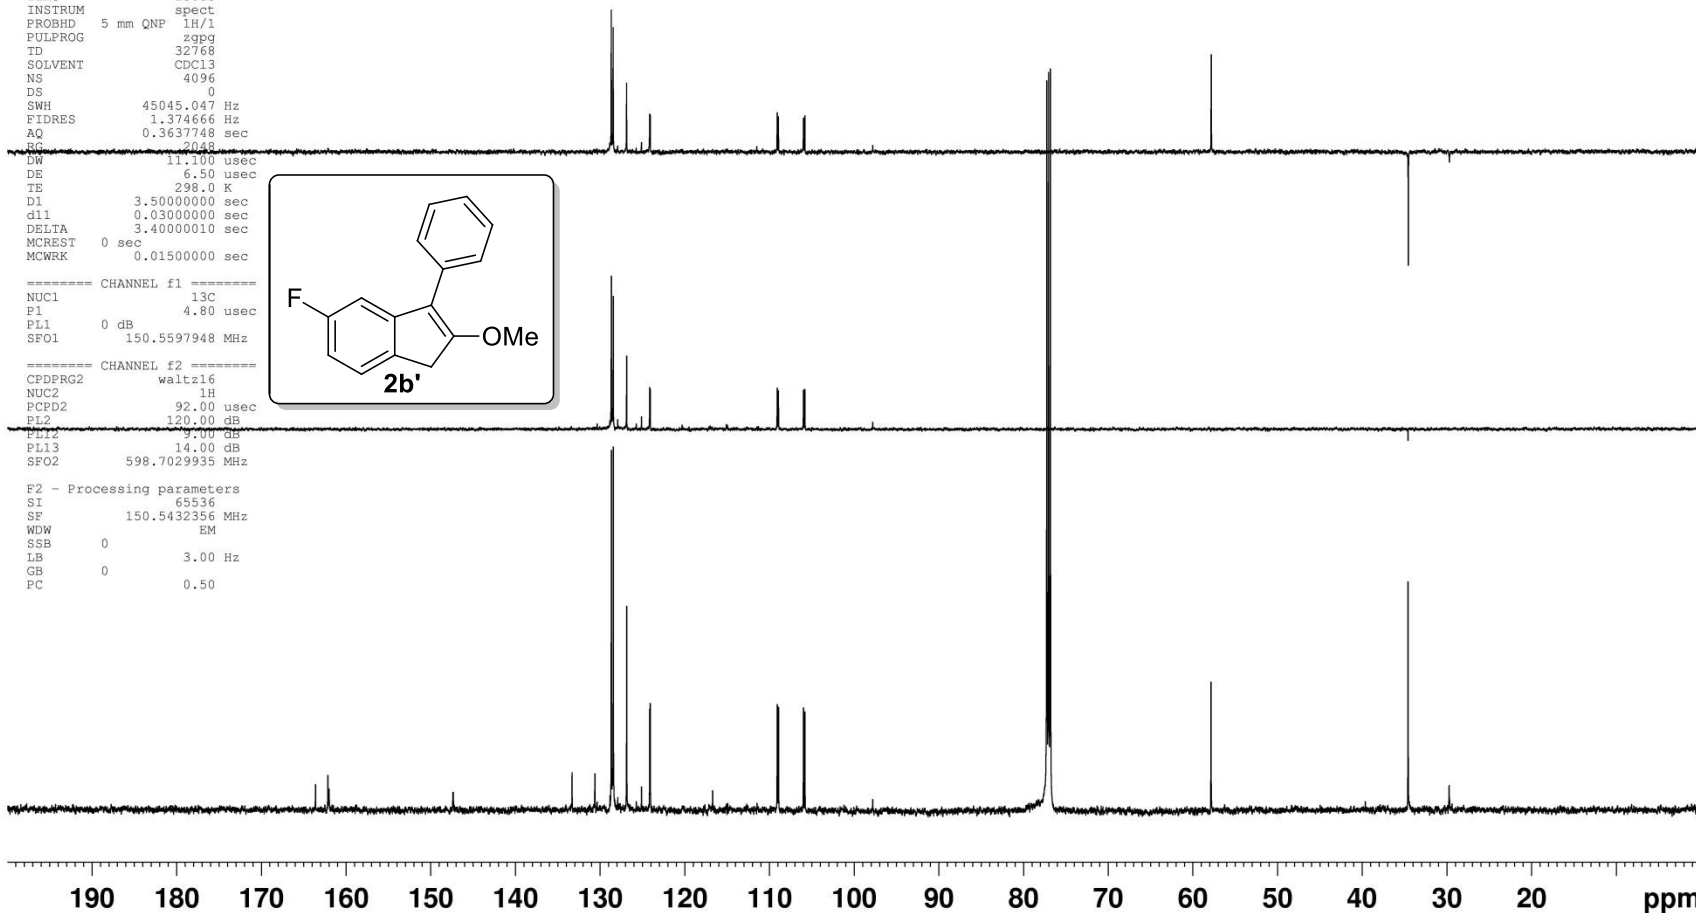

Current Data Parameters  
 NAME 2013-12-18  
 EXPNO 1  
 PROCNO 1

F2 - Acquisition Parameters  
 Date\_ 20131217  
 Time 12.26  
 INSTRUM spect  
 PROBHD 5 mm QNP 1H/1  
 PULPROG zg  
 TD 32768  
 SOLVENT CDC13  
 NS 16  
 DS 0  
 SWH 8382.222 Hz  
 FIDRES 0.255805 Hz  
 AQ 1.9546632 sec  
 RG 512  
 DW 59.650 usec  
 DE 6.50 usec  
 TE 295.1 K  
 D1 2.0000000 sec  
 MCREST 0 sec  
 MCWRK 0.0150000 sec

----- CHANNEL f1 -----  
 NUC1 1H  
 P1 10.00 usec  
 PL1 0 dB  
 SFO1 598.7029935 MHz

F2 - Processing parameters  
 SI 32768  
 SF 598.7000264 MHz  
 WDW no  
 SSB 0  
 LB 0 Hz  
 GB 0  
 PC 1.00

7.547  
 7.544  
 7.541  
 7.533  
 7.531  
 7.528  
 7.424  
 7.421  
 7.412  
 7.409  
 7.401  
 7.398  
 7.396  
 7.292  
 7.290  
 7.288  
 7.278  
 7.267  
 7.265  
 7.263  
 7.240  
 7.214  
 7.206  
 7.200  
 7.192  
 7.083  
 7.081  
 7.079  
 7.069  
 7.067  
 7.065  
 6.930  
 6.926  
 6.914  
 6.911  
 6.900  
 6.896

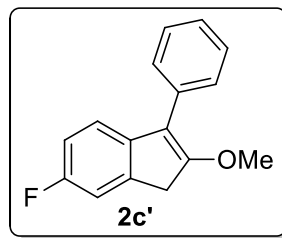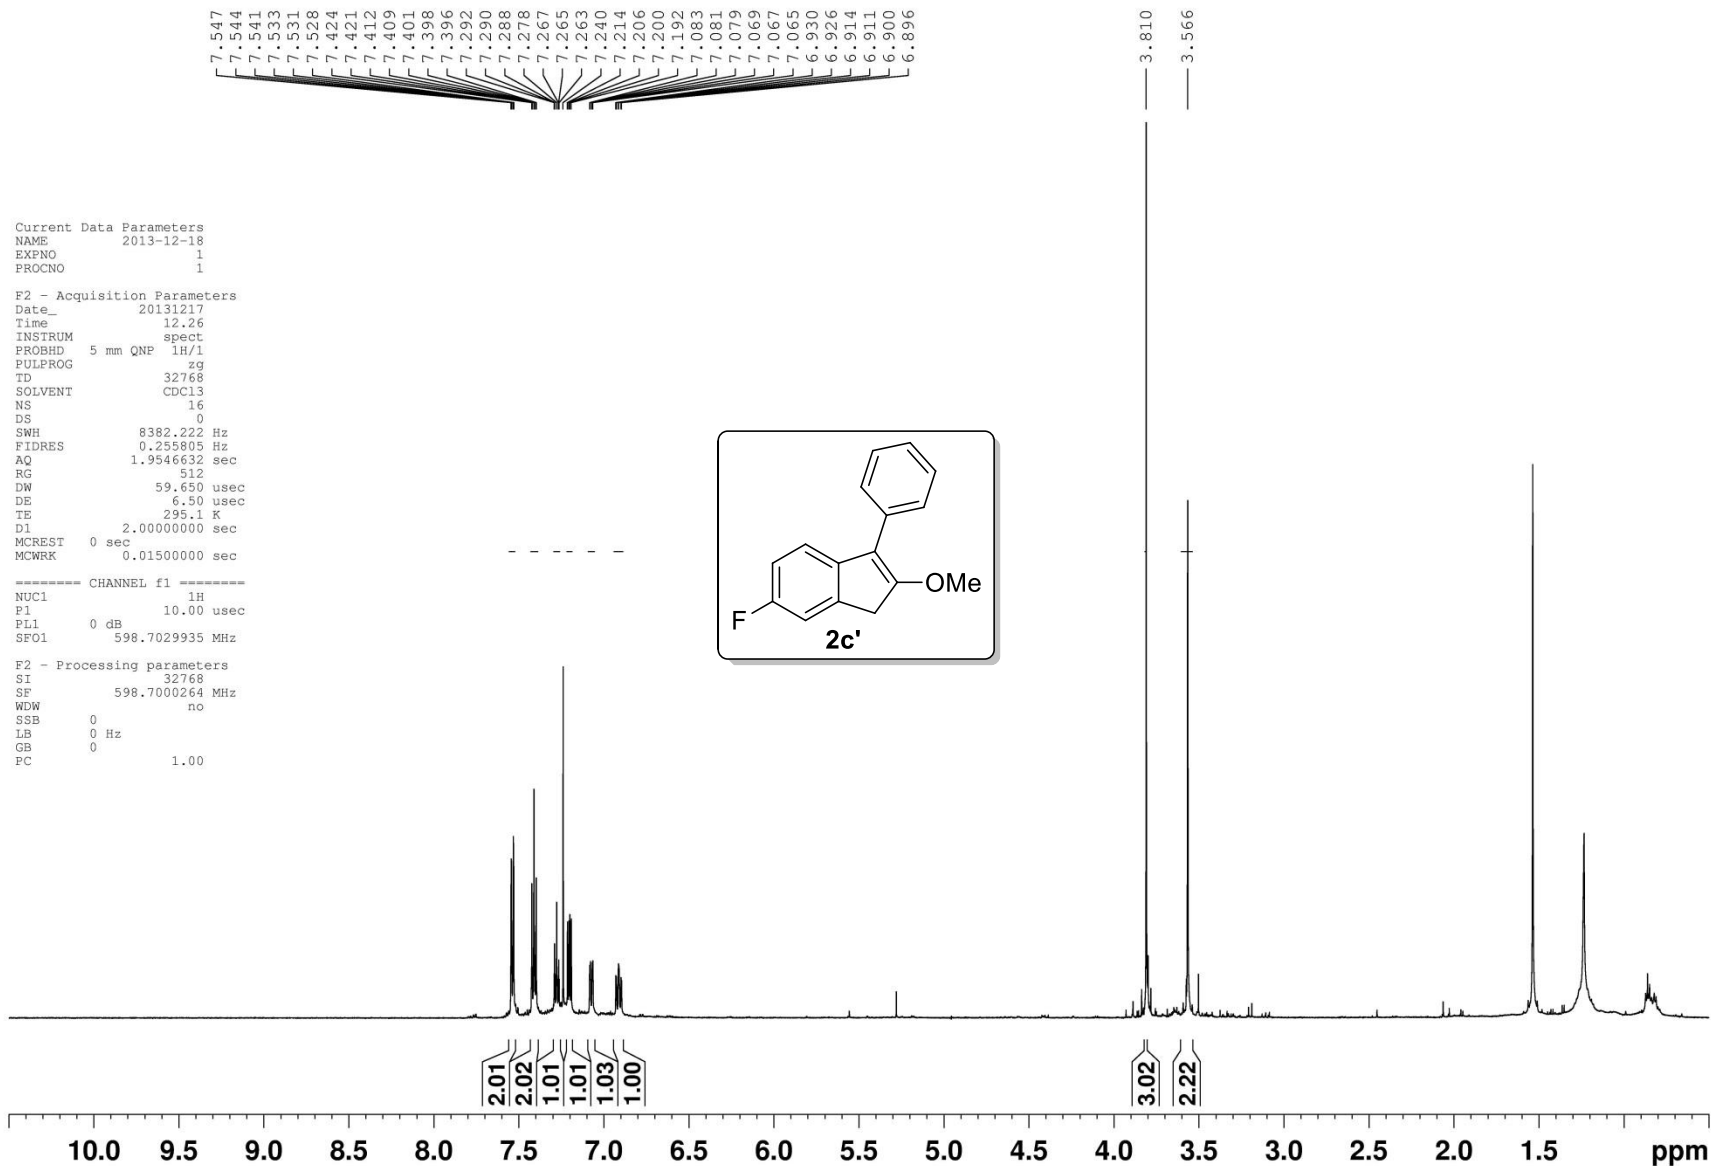

Current Data Parameters  
NAME 2013-12-18  
EXPNO 2  
PROCNO 1

F2 - Acquisition Parameters  
Date\_ 20131217  
Time 20.00  
INSTRUM spect  
PROBHD 5 mm QNP 1H/1  
PULPROG zgpg  
TD 32768  
SOLVENT CDCl3  
NS 6144  
DS 0  
SWH 45045.047 Hz  
FIDRES 1.374666 Hz  
AQ 0.3637748 sec  
RG 17248  
DW 11.100 usec  
DE 6.50 usec  
TE 297.8 K  
D1 3.50000000 sec  
d11 0.03000000 sec  
DELTA 3.40000010 sec  
MCREST 0 sec  
MCWRK 0.01500000 sec

----- CHANNEL f1 -----  
NUC1 13C  
P1 4.80 usec  
PL1 0 dB  
SFO1 150.5597948 MHz

----- CHANNEL f2 -----  
CPDPRG2 waltz16  
NUC2 1H  
PCPD2 92.00 usec  
PL2 120.00 dB  
PL12 9.00 dB  
PL13 14.00 dB  
SFO2 598.7029935 MHz

F2 - Processing parameters  
SI 65536  
SF 150.5432363 MHz  
WDW EM  
SSB 0  
LB 3.00 Hz  
GB 0  
PC 0.50

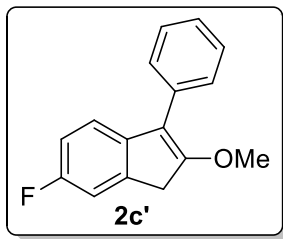

160.87  
159.47  
159.28

140.91  
137.22  
137.17  
133.58

128.71  
128.34  
126.72

118.79  
118.74  
116.39  
113.20  
113.06  
111.36  
111.20

77.21  
77.00  
76.79

57.85

35.18

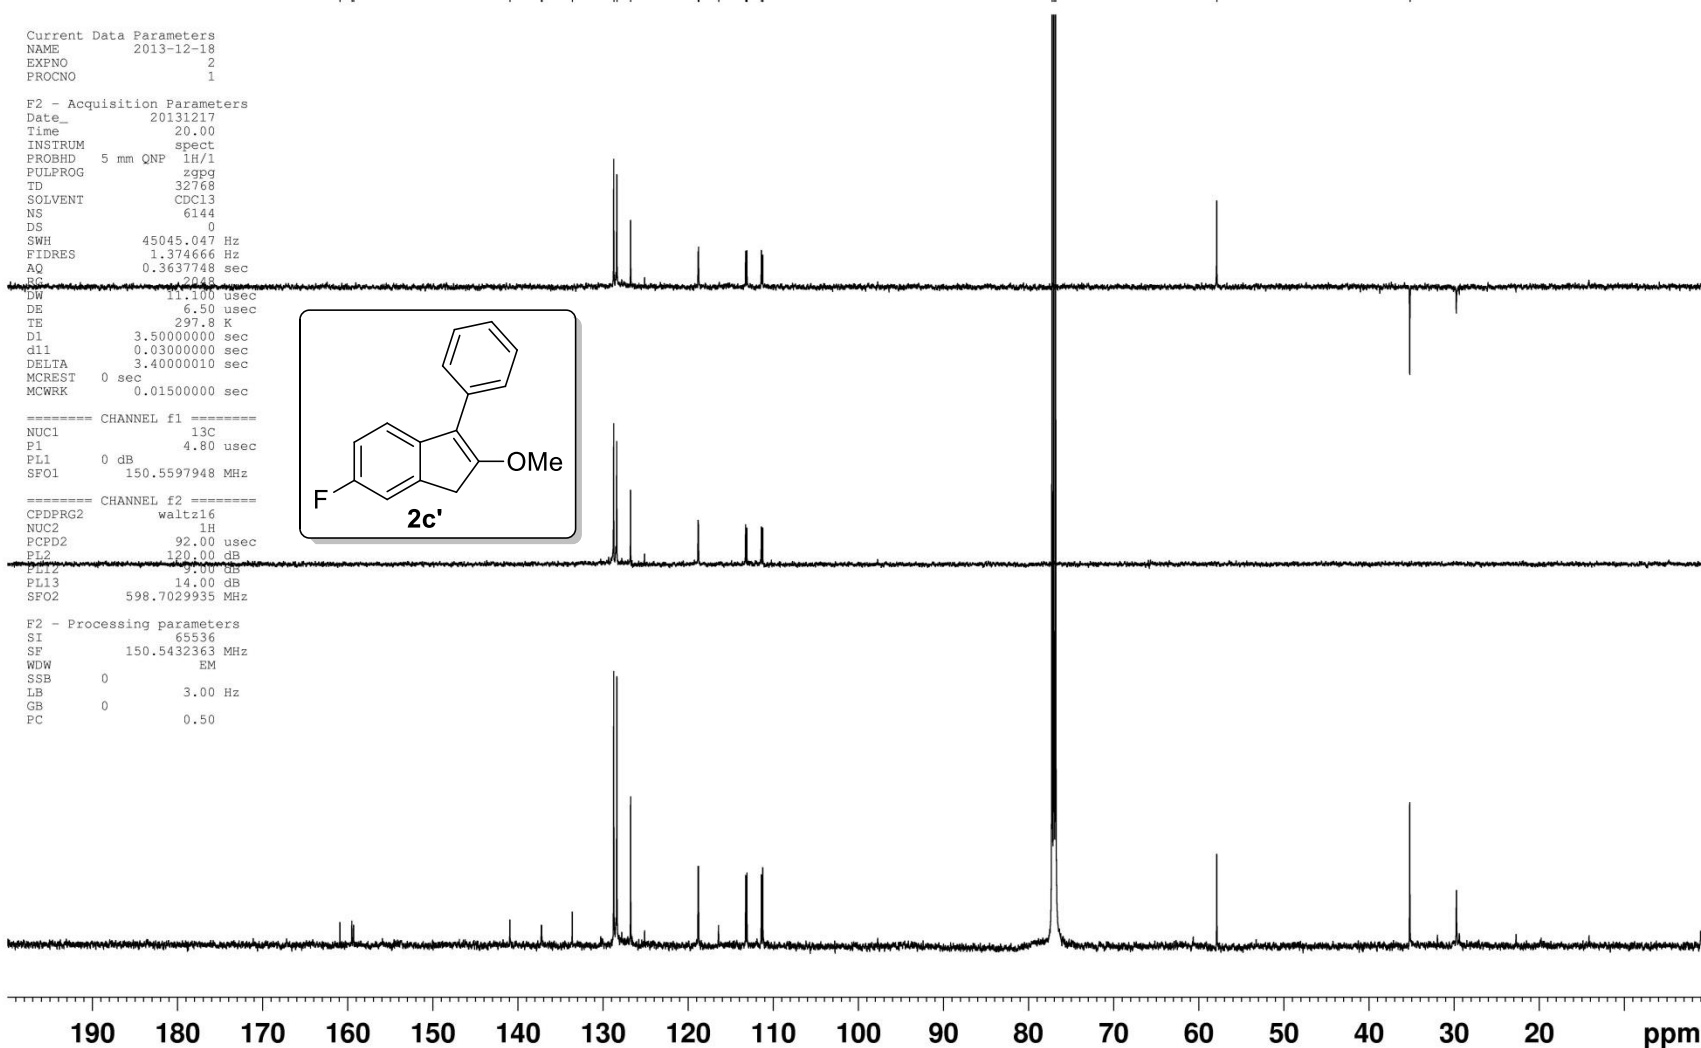

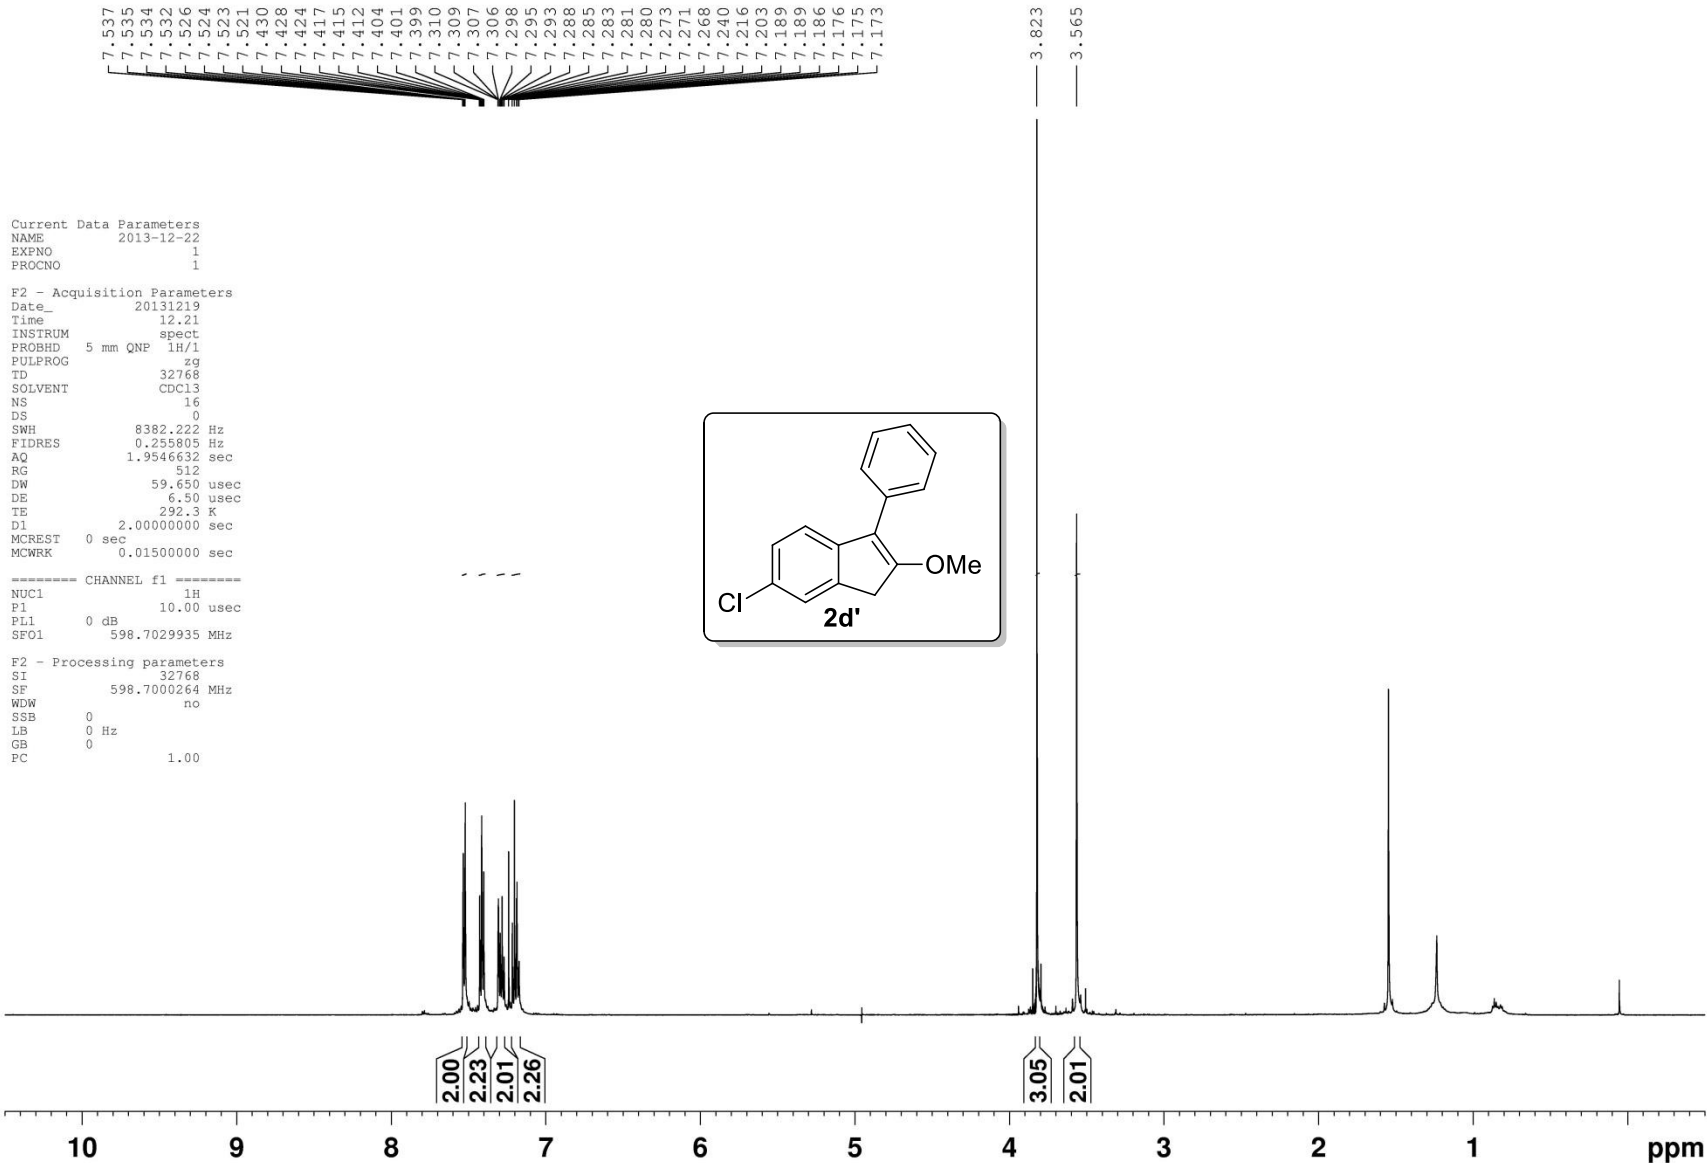

Current Data Parameters  
NAME 2013-12-22  
EXPNO 2  
PROCNO 1

F2 - Acquisition Parameters  
Date\_ 20131219  
Time 12.26  
INSTRUM spect  
PROBHD 5 mm QNP 1H/1  
PULPROG zgpg  
TD 32768  
SOLVENT CDCl3  
NS 511  
DS 0  
SWH 45045.047 Hz  
FIDRES 1.374666 Hz  
AQ 0.3637748 sec  
DM 11.100 usec  
DE 6.50 usec  
TE 293.5 K  
D1 3.50000000 sec  
d11 0.03000000 sec  
DELTA 3.40000010 sec  
MCREST 0 sec  
MCWRK 0.01500000 sec

===== CHANNEL f1 =====  
NUC1 13C  
P1 4.80 usec  
PL1 0 dB  
SFO1 150.5597948 MHz  
===== CHANNEL f2 =====  
CPDPRG2 waltz16  
NUC2 1H  
PCPD2 92.00 usec  
PL2 120.00 dB  
PL12 9.00 dB  
PL13 14.00 dB  
SFO2 598.7029935 MHz

F2 - Processing parameters  
SI 65536  
SF 150.5432390 MHz  
WDW EM  
SSB 0  
LB 3.00 Hz  
GB 0  
PC 0.50

160.37  
143.66  
137.05  
133.32  
128.67  
128.36  
128.23  
126.78  
123.73  
119.13  
116.36  
77.21  
77.00  
76.79  
57.87  
34.96

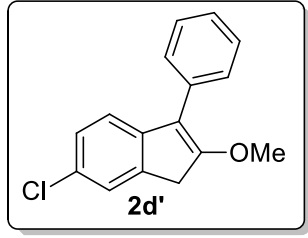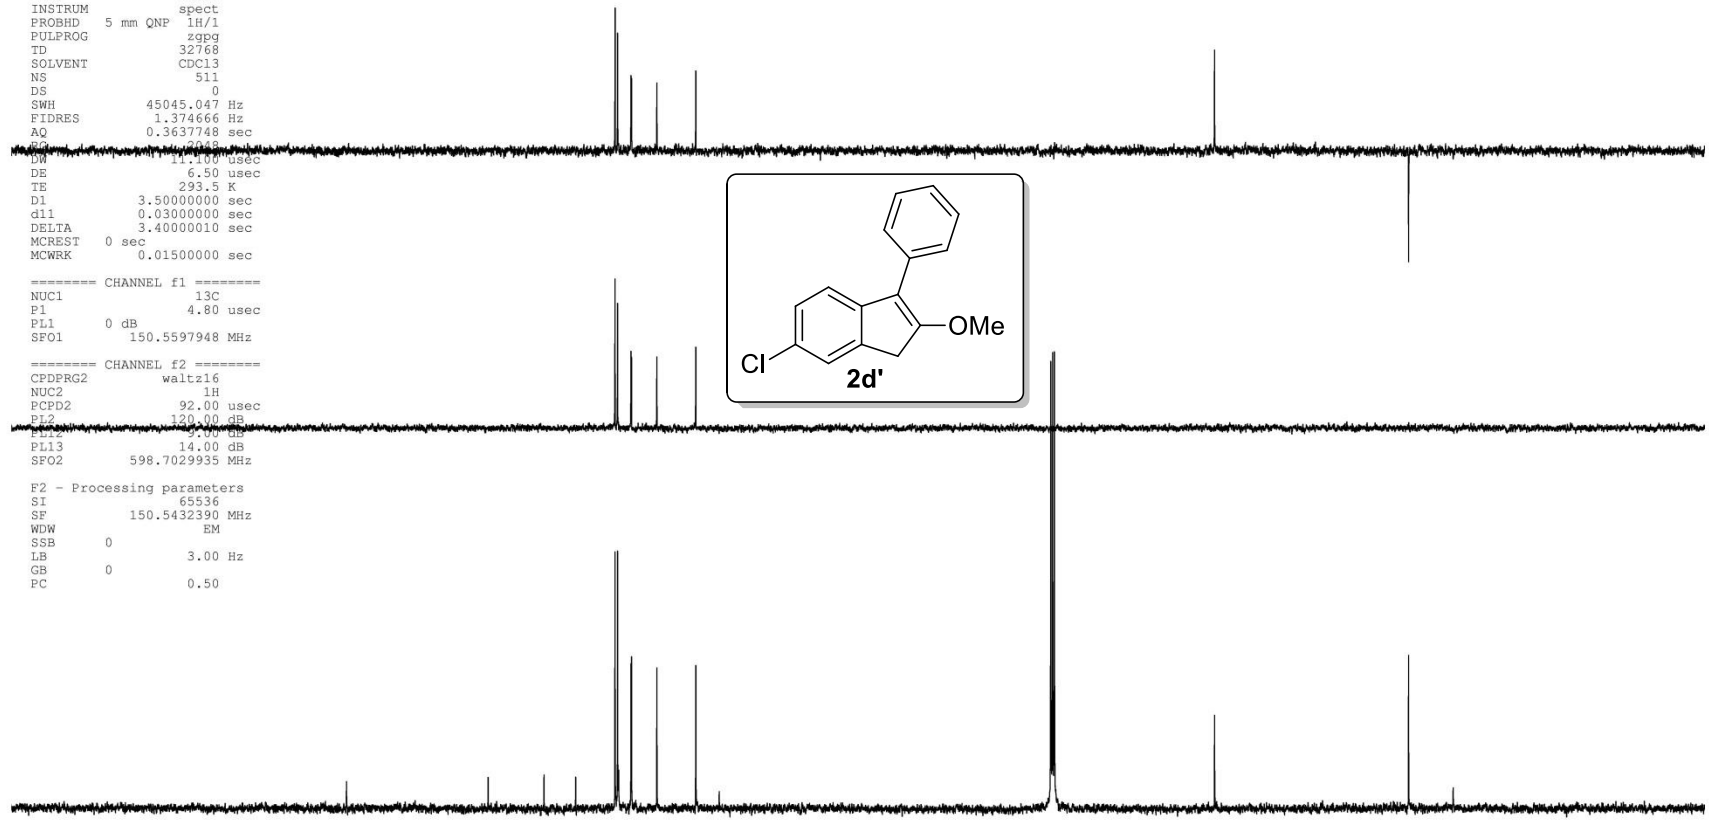

190 180 170 160 150 140 130 120 110 100 90 80 70 60 50 40 30 20 ppm

Current Data Parameters  
 NAME 2013-12-26  
 EXPNO 1  
 PROCNO 1

F2 - Acquisition Parameters  
 Date\_ 20131224  
 Time 14.28  
 INSTRUM spect  
 PROBHD 5 mm QNP 1H/1  
 PULPROG zg  
 TD 32768  
 SOLVENT CDCl3  
 NS 32  
 DS 0  
 SWH 8382.229 Hz  
 FIDRES 0.255805 Hz  
 AQ 1.9546613 sec  
 RG 128  
 DW 59.650 usec  
 DE 6.50 usec  
 TE 293.5 K  
 D1 2.0000000 sec  
 MCREST 0 sec  
 MCWRK 0.0150000 sec

----- CHANNEL f1 -----  
 NUC1 1H  
 P1 10.00 usec  
 PL1 0 dB  
 SFO1 598.7029935 MHz

F2 - Processing parameters  
 SI 32768  
 SF 598.7000264 MHz  
 WDW no  
 SSB 0  
 LB 0 Hz  
 GB 0  
 PC 1.00

7.532  
7.530  
7.527  
7.521  
7.518  
7.516  
7.450  
7.449  
7.427  
7.424  
7.414  
7.412  
7.404  
7.401  
7.339  
7.338  
7.336  
7.326  
7.322  
7.298  
7.296  
7.294  
7.286  
7.283  
7.281  
7.273  
7.271  
7.269  
7.240  
7.170  
7.156

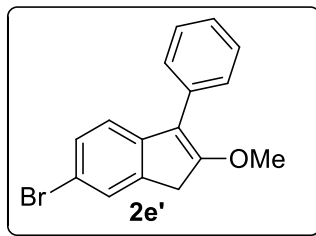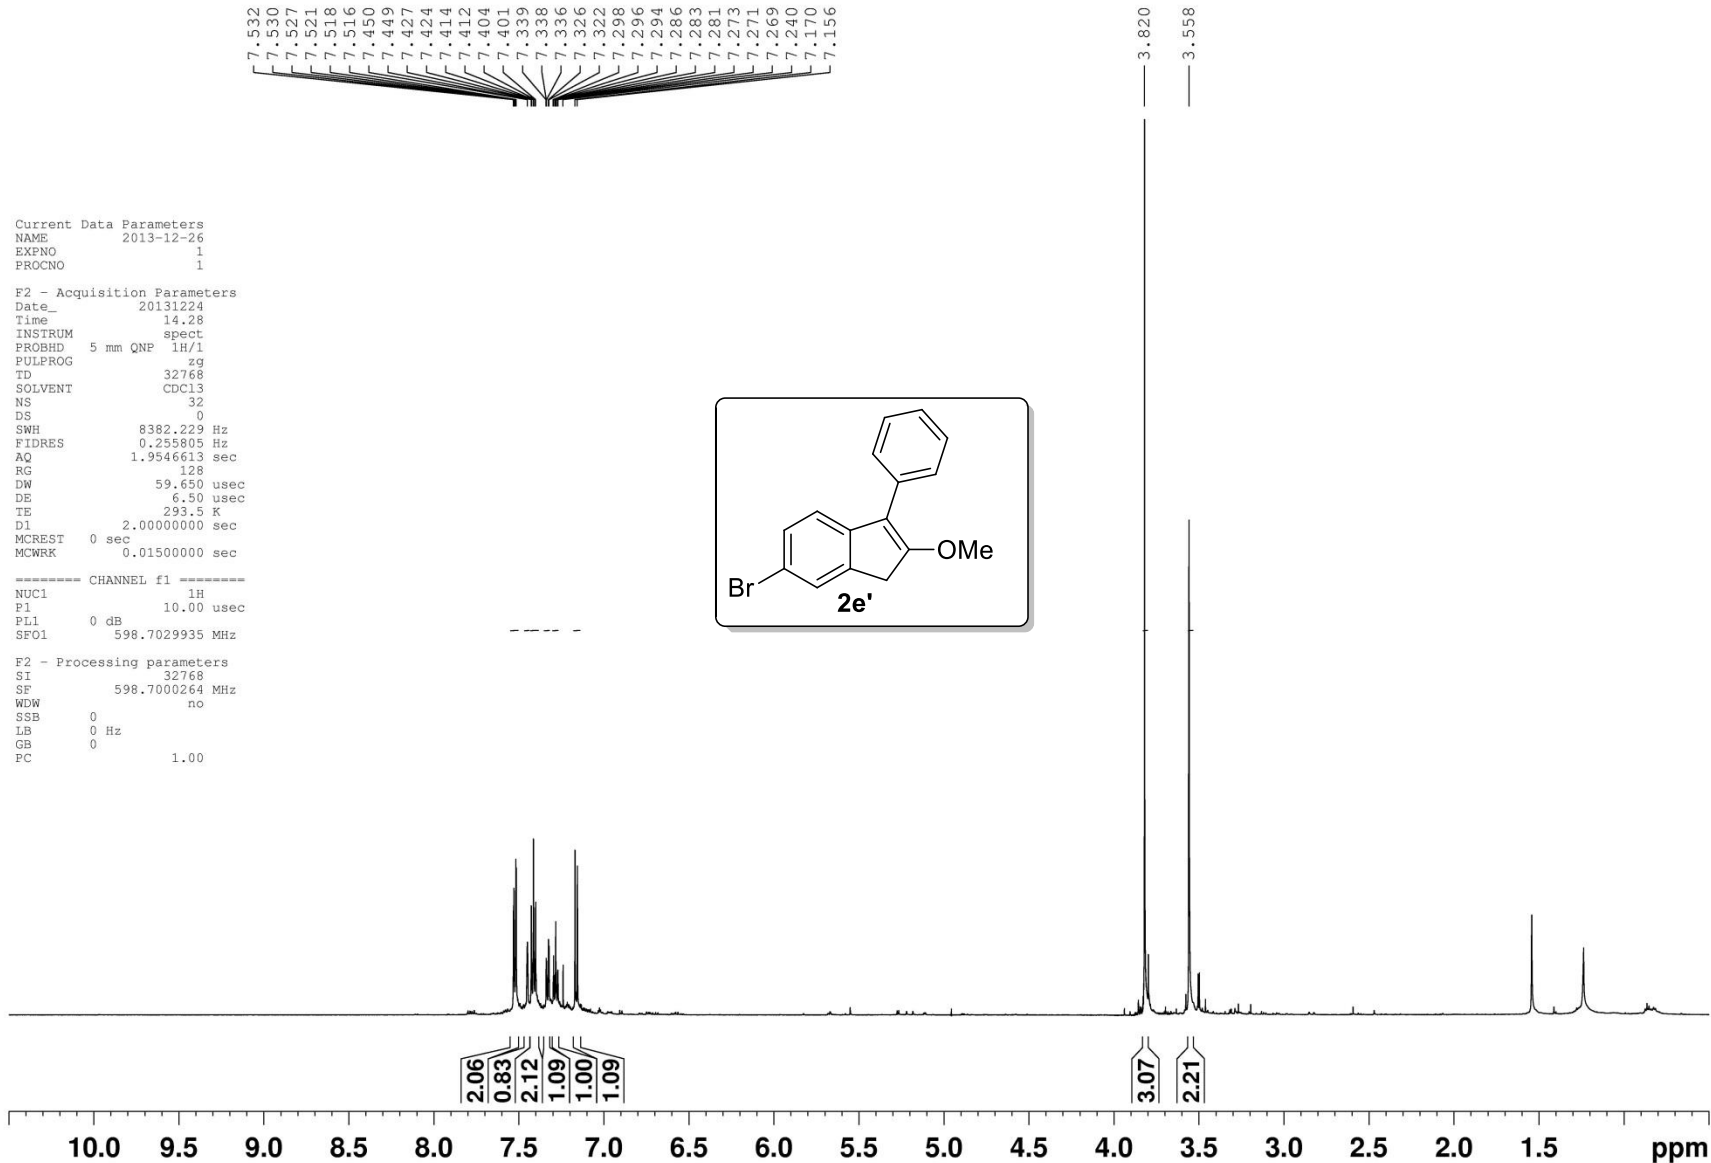

Current Data Parameters  
NAME 2013-12-26  
EXPNO 2  
PROCNO 1

F2 - Acquisition Parameters  
Date\_ 20131224  
Time 14.50  
INSTRUM spect  
PROBHD 5 mm QNP 1H/1  
PULPROG zgpg  
TD 32768  
SOLVENT CDCl3  
NS 328  
DS 0  
SWH 45045.047 Hz  
FIDRES 1.374666 Hz  
AQ 0.3637748 sec

DW 11.100 usec  
DE 6.50 usec  
TE 295.5 K  
D1 3.50000000 sec  
d11 0.03000000 sec  
DELTA 3.40000010 sec  
MCREST 0 sec  
MCWRK 0.01500000 sec

==== CHANNEL f1 =====  
NUC1 13C  
P1 4.80 usec  
PL1 0 dB  
SFO1 150.5597948 MHz

==== CHANNEL f2 =====  
CPDPRG2 waltz16  
NUC2 1H  
PCPD2 92.00 usec  
PL2 120.00 dB  
PL12 9.00 dB  
PL13 14.00 dB  
SFO2 598.7029935 MHz

F2 - Processing parameters  
SI 65536  
SF 150.5432383 MHz  
WDW EM  
SSB 0  
LB 3.00 Hz  
GB 0  
PC 0.50

— 160.41  
— 144.15  
— 137.43  
— 133.27  
— 129.60  
— 128.68  
— 128.36  
— 126.80  
— 126.50  
— 119.62  
— 116.44  
— 115.96  
— 77.21  
— 77.00  
— 76.78  
— 57.88  
— 34.94

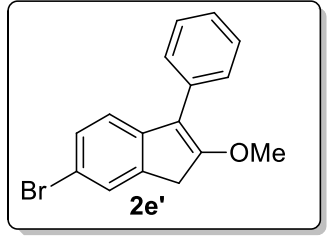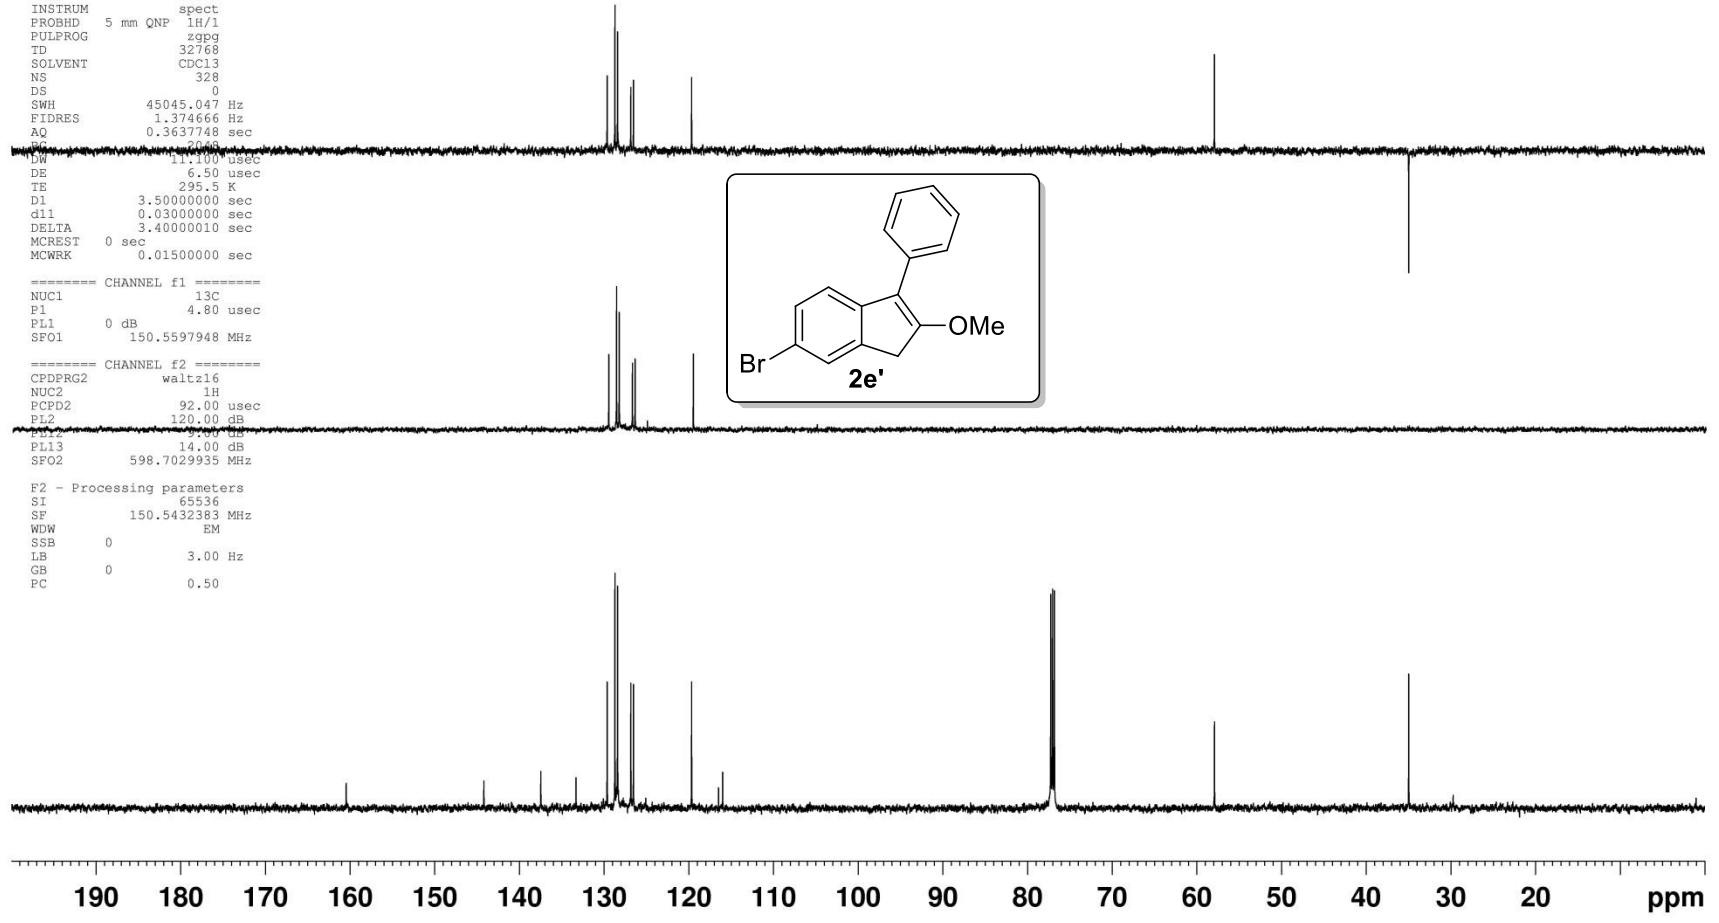

Current Data Parameters  
 NAME 2013-12-02  
 EXPNO 1  
 PROCNO 1

F2 - Acquisition Parameters  
 Date\_ 20131203  
 Time 6.32  
 INSTRUM spect  
 PROBHD 5 mm QNP 1H/1  
 PULPROG zg  
 TD 32768  
 SOLVENT CDCl3  
 NS 16  
 DS 0  
 SWH 8389.262 Hz  
 FIDRES 0.256020 Hz  
 AQ 1.9530228 sec  
 RG 256  
 DW 59.600 usec  
 DE 6.50 usec  
 TE 296.0 K  
 D1 2.0000000 sec  
 MCREST 0 sec  
 MCWRK 0.01500000 sec

----- CHANNEL f1 -----  
 NUC1 1H  
 P1 10.00 usec  
 PL1 0 dB  
 SFO1 598.7029935 MHz

F2 - Processing parameters  
 SI 32768  
 SF 598.7000257 MHz  
 WDW no  
 SSB 0  
 LB 0 Hz  
 GB 0  
 PC 1.00

7.581  
7.579  
7.568  
7.567  
7.431  
7.418  
7.407  
7.406  
7.359  
7.357  
7.346  
7.345  
7.327  
7.314  
7.293  
7.291  
7.280  
7.279  
7.268  
7.266  
7.240  
7.235  
7.223  
7.210  
7.093  
7.092  
7.081  
7.079  
7.069  
7.067

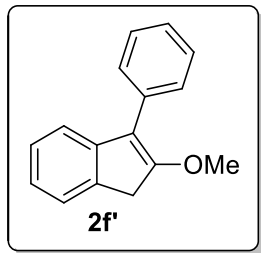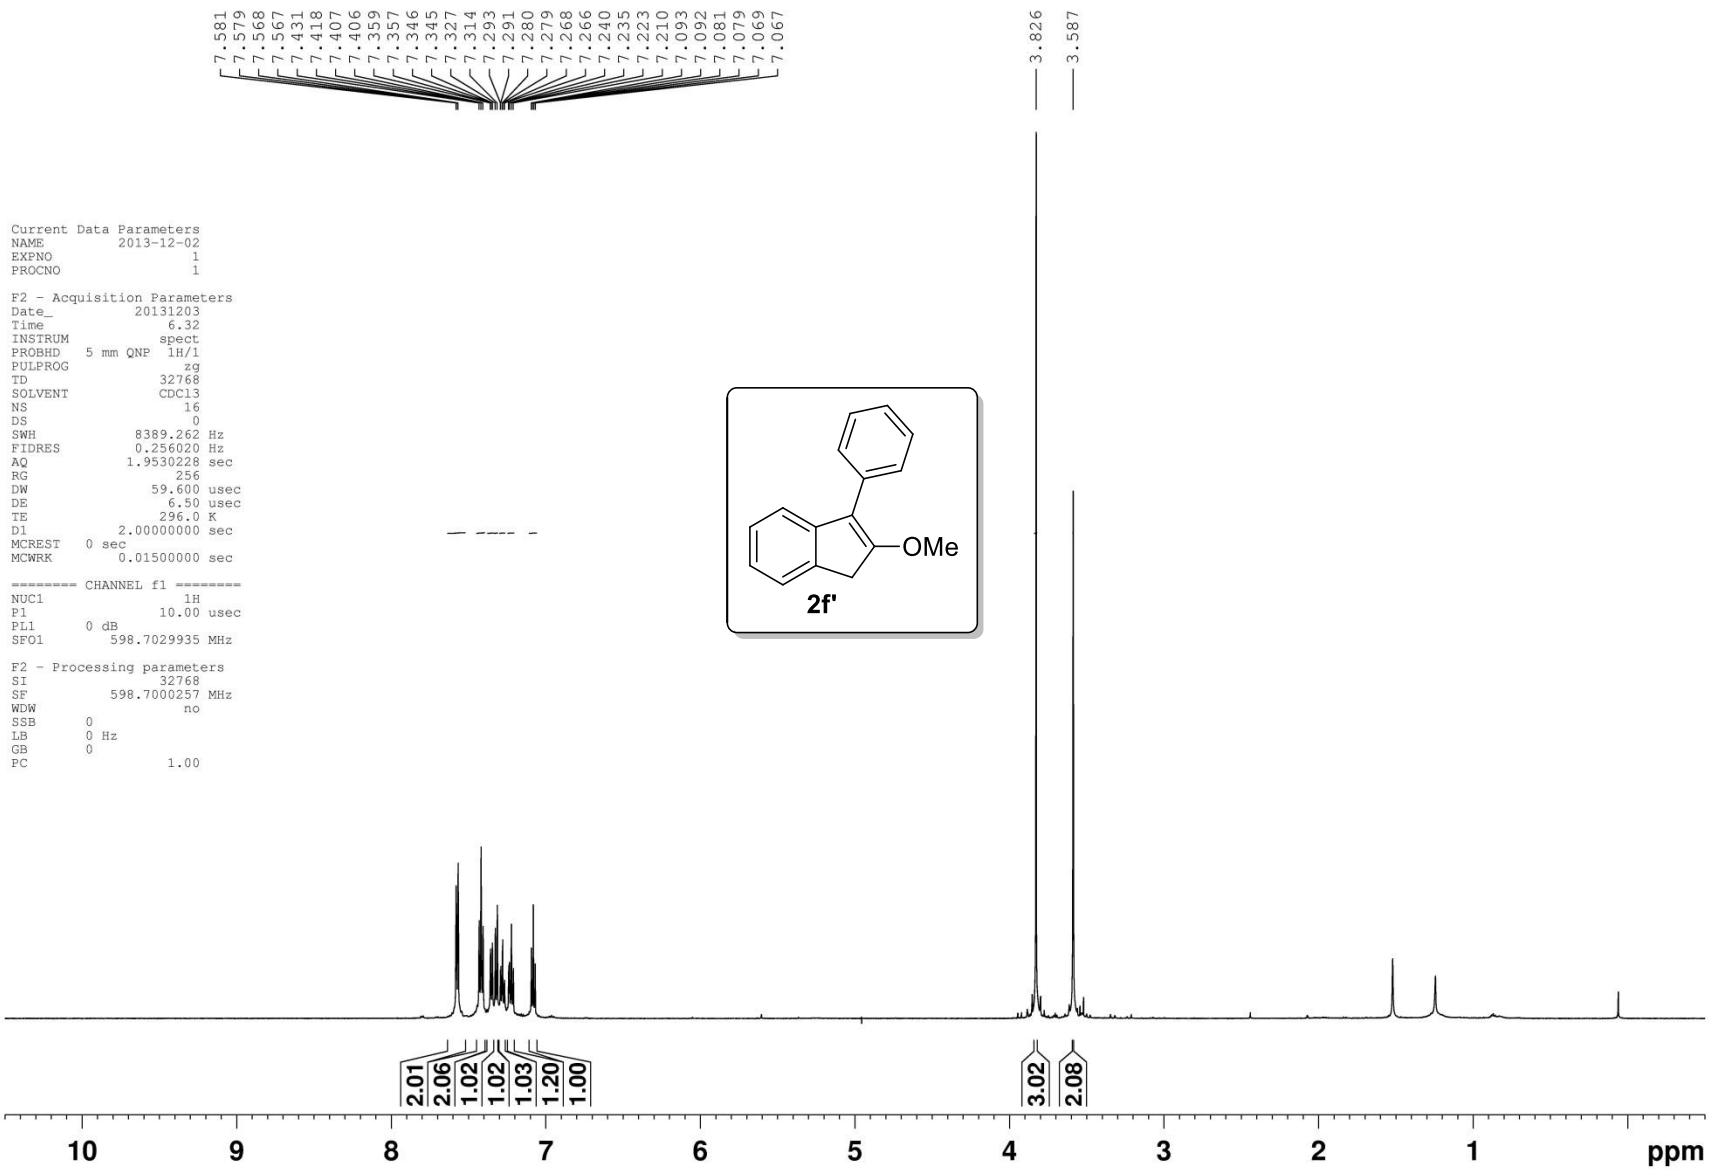



Current Data Parameters  
NAME 2013-12-02  
EXPNO 2  
PROCNO 1

F2 - Acquisition Parameters

Date\_ 20131203  
Time 6.37  
INSTRUM spect  
PROBHD 5 mm QNP 1H/1  
PULPROG zgpg  
TD 32768  
SOLVENT CDCl3  
NS 362  
DS 0  
SWH 45045.047 Hz  
FIDRES 1.374666 Hz  
AQ 0.3637748 sec  
DM 11.100 usec  
DE 6.50 usec  
TE 297.0 K  
D1 3.50000000 sec  
d11 0.03000000 sec  
DELTA 3.40000010 sec  
MCREST 0 sec  
MCWRK 0.01500000 sec

===== CHANNEL f1 =====  
NUC1 13C  
P1 4.80 usec  
PL1 0 dB  
SFO1 150.5597948 MHz

===== CHANNEL f2 =====  
CPDPRG2 waltz16  
NUC2 1H  
PCPD2 92.00 usec  
PL2 120.00 dB  
PL11 120.00 dB  
PL13 14.00 dB  
SFO2 598.7029935 MHz

F2 - Processing parameters  
SI 65536  
SF 150.5432383 MHz  
WDW EM  
SSB 0  
LB 3.00 Hz  
GB 0  
PC 0.50

— 160.42

— 145.17

— 135.53

— 133.76

— 128.79

— 128.27

— 126.66

— 126.57

— 123.36

— 122.69

— 118.35

— 116.89

— 77.21

— 76.99

— 76.78

— 57.79

— 35.10

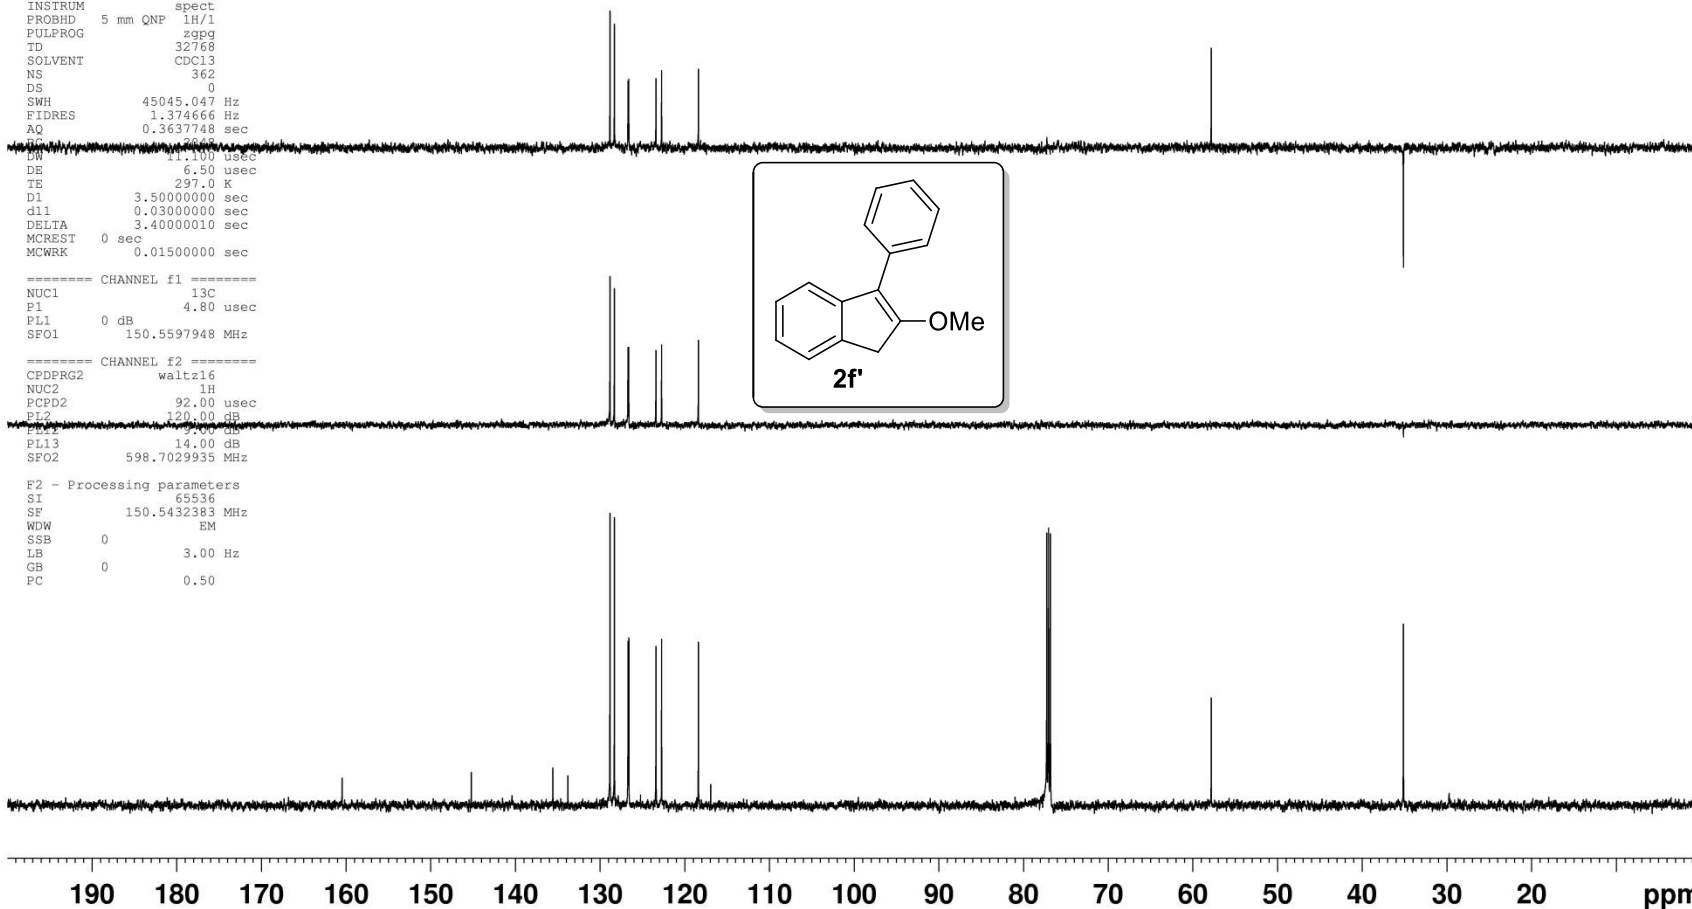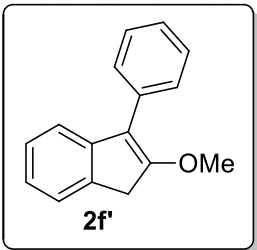

```

Current Data Parameters
NAME      2013-11-22
EXPNO    1
PROCNO   1

F2 - Acquisition Parameters
Date_    20131120
Time     8.14
INSTRUM  spect
PROBHD   5 mm QNP 1H/1
PULPROG  zg
TD       16384
SOLVENT  CDCl3
NS       16
DS       0
SWH      7183.908 Hz
FIDRES   0.438471 Hz
AQ       1.1403764 sec
RG       128
DW       69.600 usec
DE       6.50 usec
TE       297.0 K
D1       1.0000000 sec
MCREST   0 sec
MCWRK    0.0150000 sec

----- CHANNEL f1 -----
NUC1     1H
P1       8.30 usec
PL1     0 dB
SFO1    598.7029935 MHz

F2 - Processing parameters
SI       32768
SF       598.7000260 MHz
WDW      no
SSB      0
LB       0 Hz
GB       0
PC       1.00

```

7.564  
7.562  
7.551  
7.433  
7.430  
7.420  
7.409  
7.293  
7.291  
7.289  
7.281  
7.279  
7.268  
7.267  
7.239  
7.235  
7.223  
7.123  
6.900  
6.888

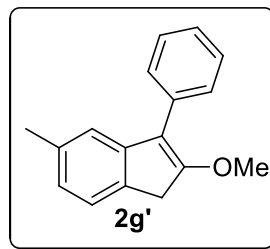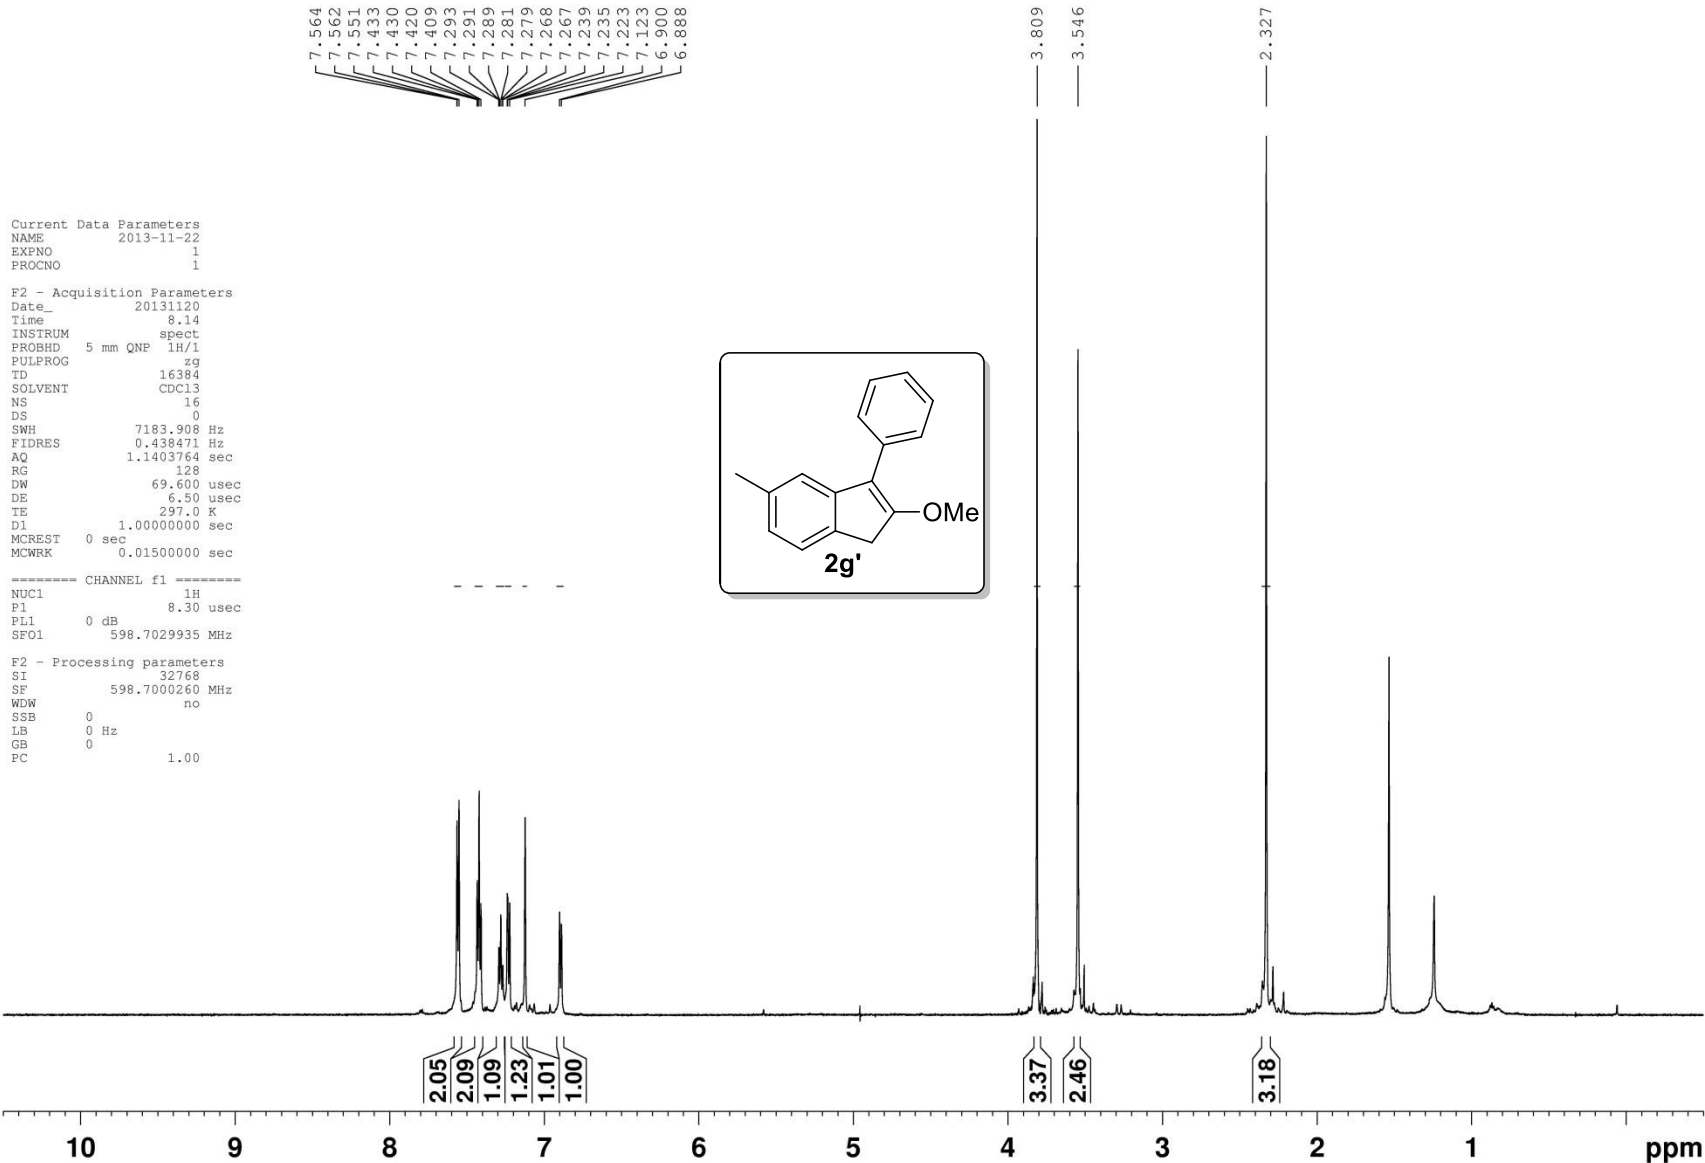

Current Data Parameters  
NAME 2013-11-22  
EXPNO 2  
PROCNO 1

F2 - Acquisition Parameters  
Date\_ 20131120  
Time 8.19  
INSTRUM spect  
PROBHD 5 mm QNP 1H/1  
PULPROG zgpg  
TD 32768  
SOLVENT CDCl3  
NS 443  
DS 0  
SWH 45045.047 Hz  
FIDRES 1.374666 Hz  
AQ 0.3637748 sec  
DM 11.100 USEC  
DE 6.50 usec  
TE 298.4 K  
D1 3.50000000 sec  
d11 0.03000000 sec  
DELTA 3.40000010 sec  
MCREST 0 sec  
MCWRK 0.01500000 sec

===== CHANNEL f1 =====  
NUC1 13C  
P1 4.80 usec  
PL1 0 dB  
SFO1 150.5597948 MHz  
===== CHANNEL f2 =====  
CPDPRG2 waltz16  
NUC2 1H  
PCPD2 92.00 usec  
PL2 120.00 dB  
PL12 19.00 dB  
PL13 14.00 dB  
SFO2 598.7029935 MHz

F2 - Processing parameters  
SI 65536  
SF 150.5432356 MHz  
WDW EM  
SSB 0  
LB 3.00 Hz  
GB 0  
PC 0.50

160.66  
145.32  
136.31  
133.89  
132.54  
128.86  
128.27  
126.54  
123.40  
123.09  
119.17  
116.89  
77.21  
77.00  
76.79  
57.76  
34.77  
21.68

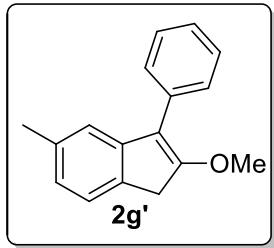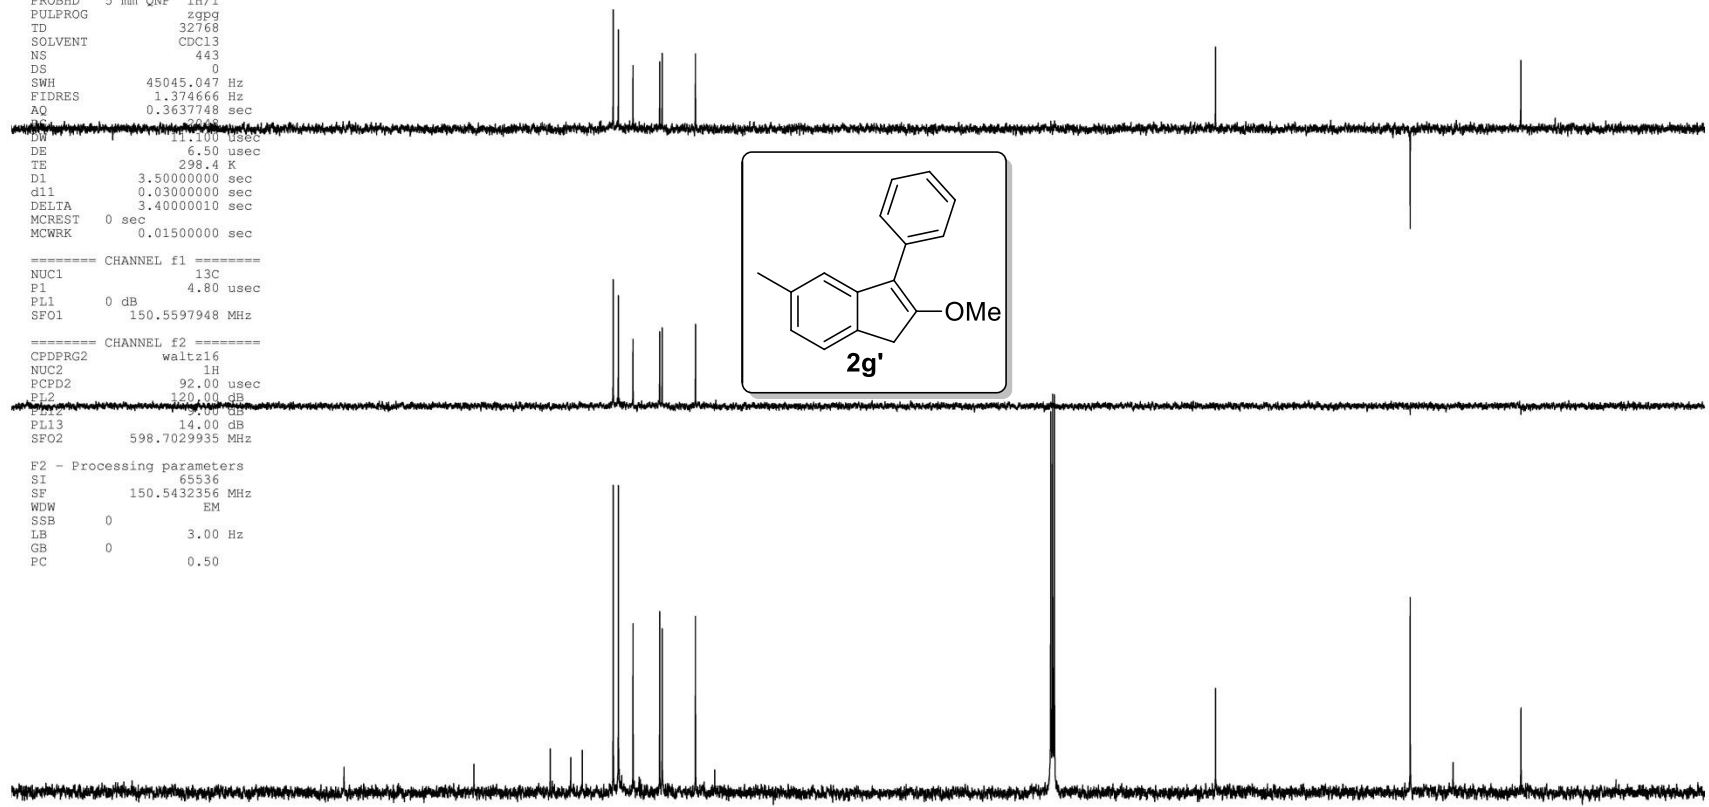

190 180 170 160 150 140 130 120 110 100 90 80 70 60 50 40 30 20 ppm

Current Data Parameters  
 NAME 2013-12-12  
 EXPNO 1  
 PROCNO 1

F2 - Acquisition Parameters  
 Date\_ 20131216  
 Time 13.54  
 INSTRUM spect  
 PROBHD 5 mm QNP 1H/1  
 PULPROG zg  
 TD 32768  
 SOLVENT CDCl3  
 NS 16  
 DS 0  
 SWH 8382.222 Hz  
 FIDRES 0.255805 Hz  
 AQ 1.9546632 sec  
 RG 512  
 DW 59.650 usec  
 DE 6.50 usec  
 TE 295.4 K  
 D1 2.0000000 sec  
 MCREST 0 sec  
 MCWRK 0.0150000 sec

----- CHANNEL f1 -----  
 NUC1 1H  
 P1 10.00 usec  
 PL1 0 dB  
 SFO1 598.702935 MHz

F2 - Processing parameters  
 SI 32768  
 SF 598.7000259 MHz  
 WDW no  
 SSB 0  
 LB 0 Hz  
 GB 0  
 PC 1.00

7.580  
7.577  
7.566  
7.564  
7.446  
7.443  
7.433  
7.422  
7.420  
7.367  
7.364  
7.302  
7.300  
7.295  
7.288  
7.282  
7.278  
7.276  
7.274  
7.241  
7.137  
7.134  
7.124  
7.121

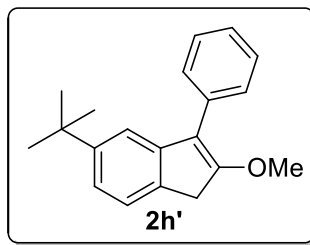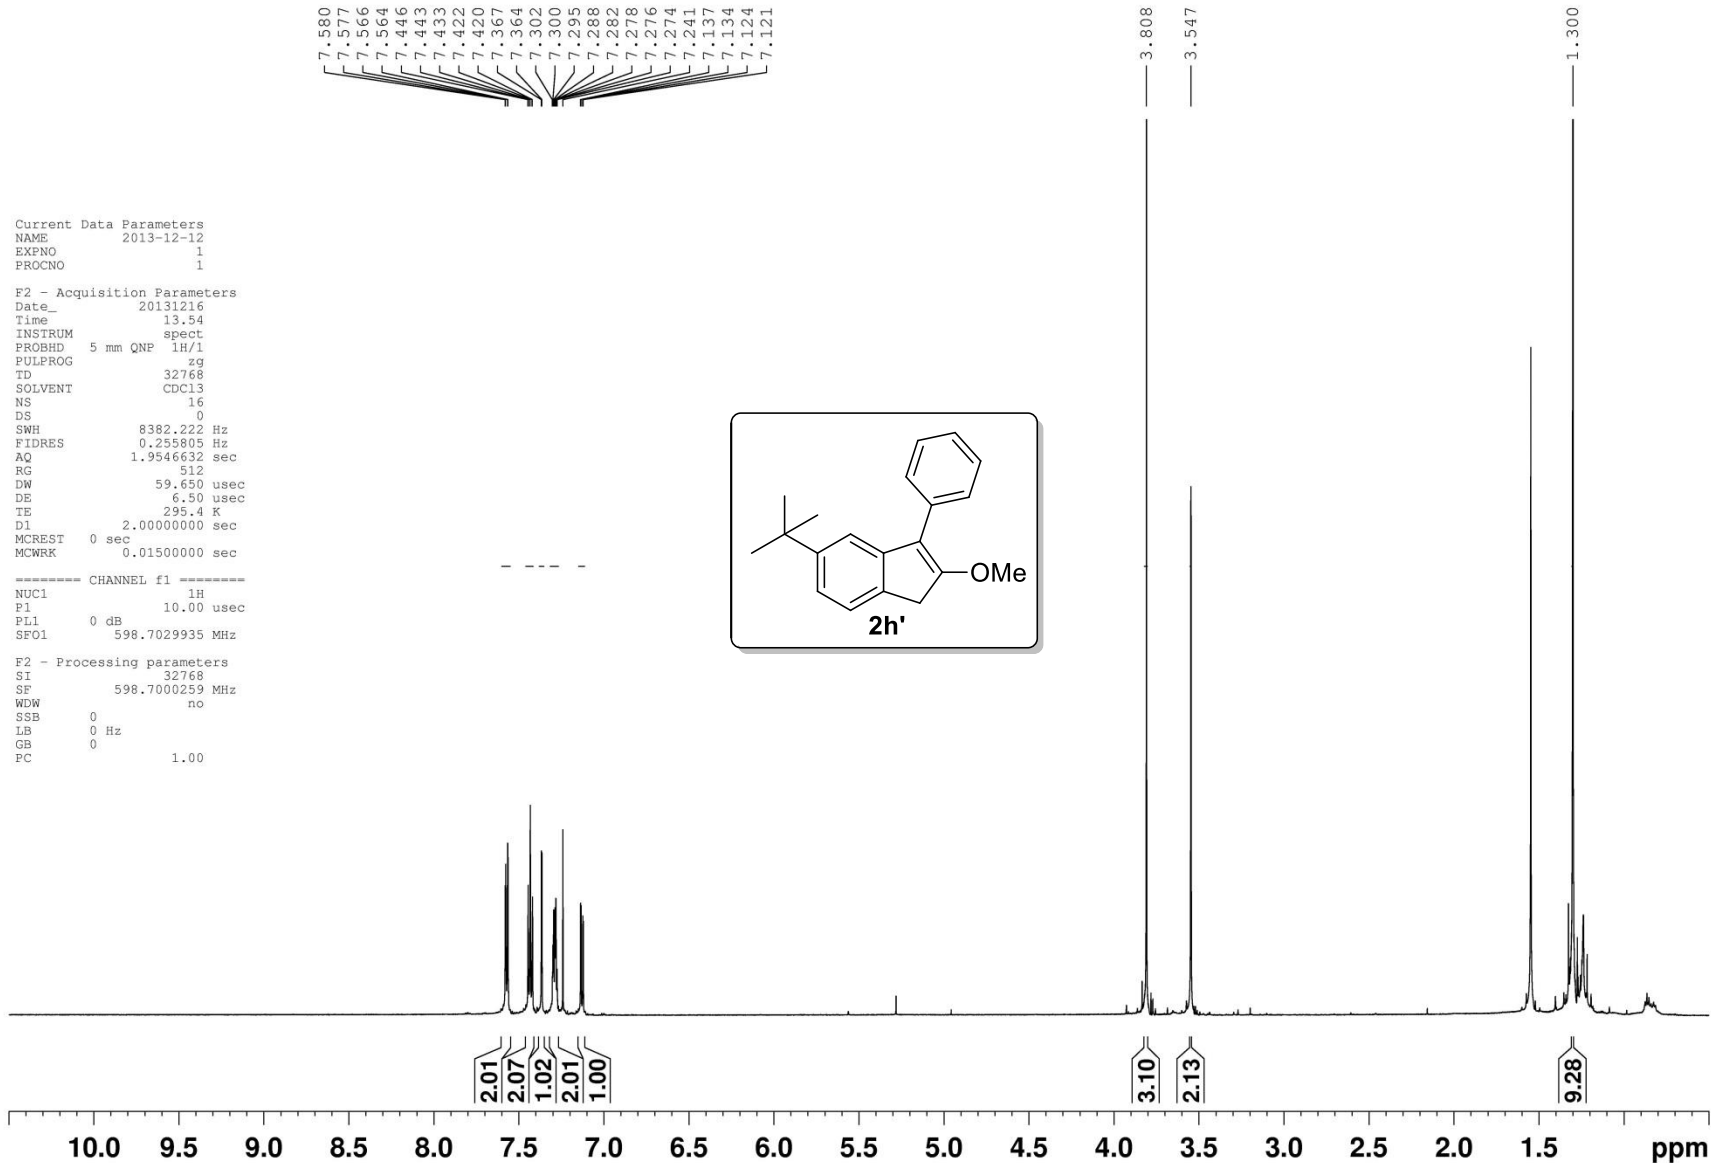

Current Data Parameters  
NAME 2013-12-12  
EXPNO 2  
PROCNO 1

F2 - Acquisition Parameters  
Date\_ 20131216  
Time 12.51  
INSTRUM spect  
PROBHD 5 mm QNP 1H/1  
PULPROG zgpg  
TD 32768  
SOLVENT CDCl3  
NS 615  
DS 0  
SWH 45045.047 Hz  
FIDRES 1.374666 Hz  
AQ 0.3637748 sec

DE 11.100 usec  
TE 296.0 K  
D1 3.50000000 sec  
d11 0.03000000 sec  
DELTA 3.40000010 sec  
MCREST 0 sec  
MCWRK 0.01500000 sec

===== CHANNEL f1 =====  
NUC1 13C  
P1 4.80 usec  
PL1 0 dB  
SFO1 150.5597948 MHz

===== CHANNEL f2 =====  
CPDPRG2 waltz16  
NUC2 1H  
PCPD2 92.00 usec  
PL2 120.00 dB  
PL3 14.00 dB  
SFO2 598.7029935 MHz

F2 - Processing parameters  
SI 65536  
SF 150.5432376 MHz  
WDW EM  
SSB 0  
LB 3.00 Hz  
GB 0  
PC 0.50

160.63  
149.92  
144.89  
133.90  
132.70  
128.82  
128.31  
126.49  
122.93  
119.71  
117.16  
115.47  
77.21  
77.00  
76.79  
57.74  
34.80  
34.63  
31.62

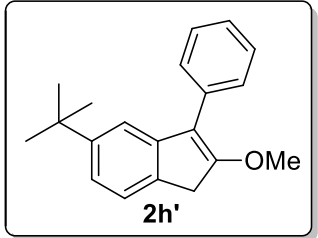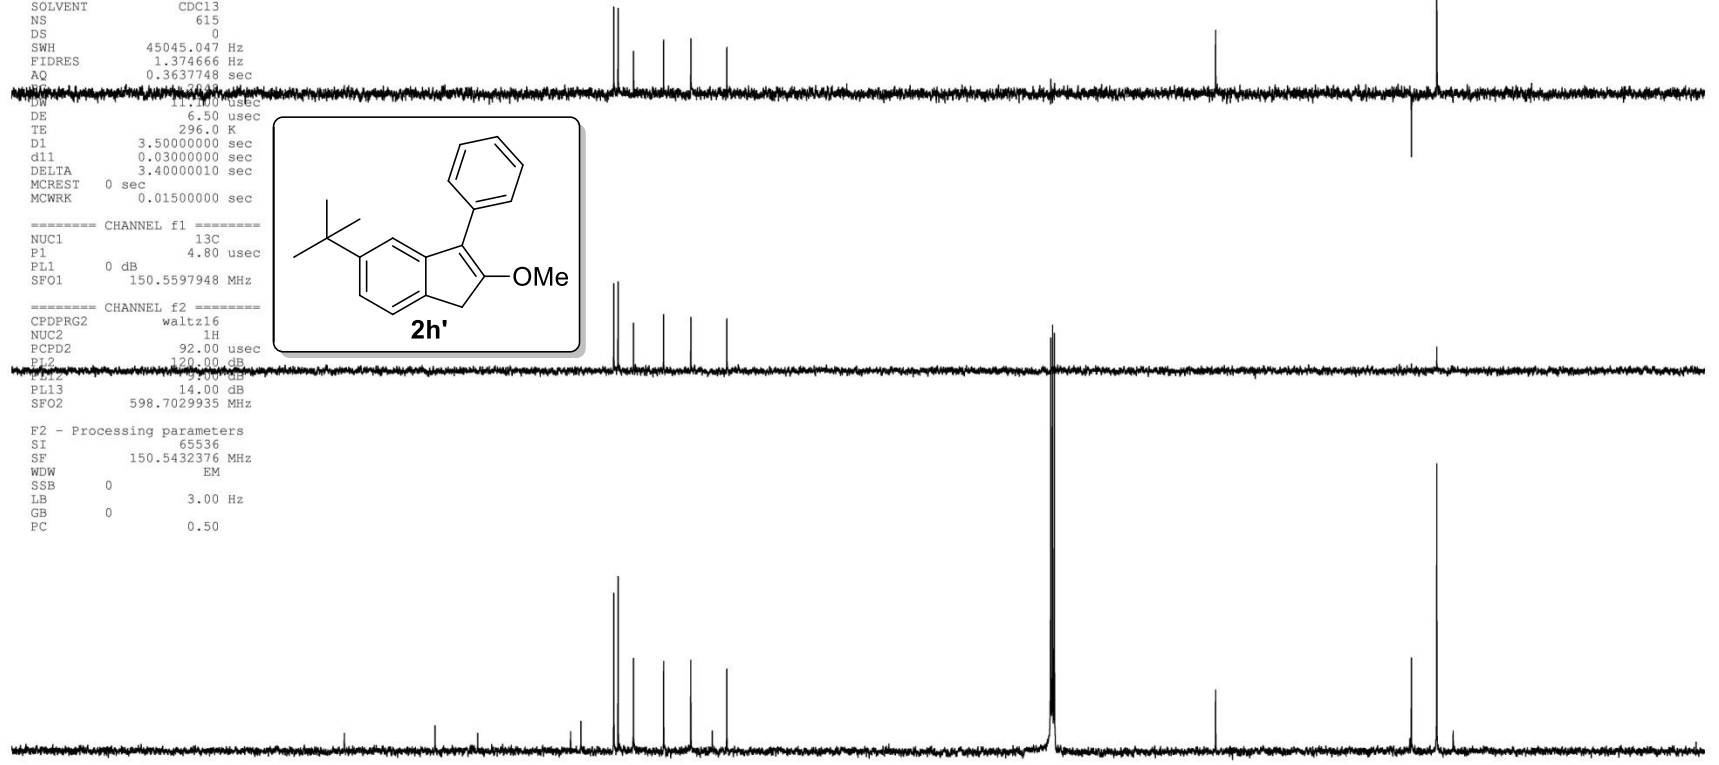

190 180 170 160 150 140 130 120 110 100 90 80 70 60 50 40 30 20 ppm

```

Current Data Parameters
NAME      Hao-4-Me-I-2
EXPNO    1
PROCNO   1

F2 - Acquisition Parameters
Date_    20140327
Time     20.54
INSTRUM  spect
PROBHD   5 mm QNP 1H/1
PULPROG  zg
TD       32768
SOLVENT  CDCl3
NS       32
DS       0
SWH      9578.544 Hz
FIDRES   0.292314 Hz
AQ       1.7105396 sec
RG       256
DW       52.200 usec
DE       6.50 usec
TE       295.3 K
D1       2.0000000 sec
MCREST   0.0000000 sec
MCWRK    0.0150000 sec

----- CHANNEL f1 -----
NUC1     1H
P1       10.00 usec
PL1      3.00 dB
SFO1     598.7029935 Mhz

F2 - Processing parameters
SI       32768
SF       598.7000258 Mhz
WDW      no
SSB      0
LB       0.00 Hz
GB       0
PC       1.00

1D NMR plot parameters
CX       20.00 cm
CY       8.00 cm
FLP      7.631 ppm
F1       4568.54 Hz
F2P      6.982 ppm
F2       4180.01 Hz
PFMCM    0.03245 ppm/cm
HZCM     19.42614 Hz/cm

```

7.574  
7.572  
7.560  
7.558  
7.418  
7.405  
7.394  
7.392  
7.278  
7.276  
7.274  
7.263  
7.253  
7.251  
7.249  
7.240  
7.215  
7.203  
7.176  
7.1040  
7.1027

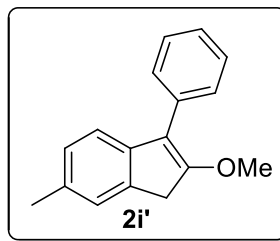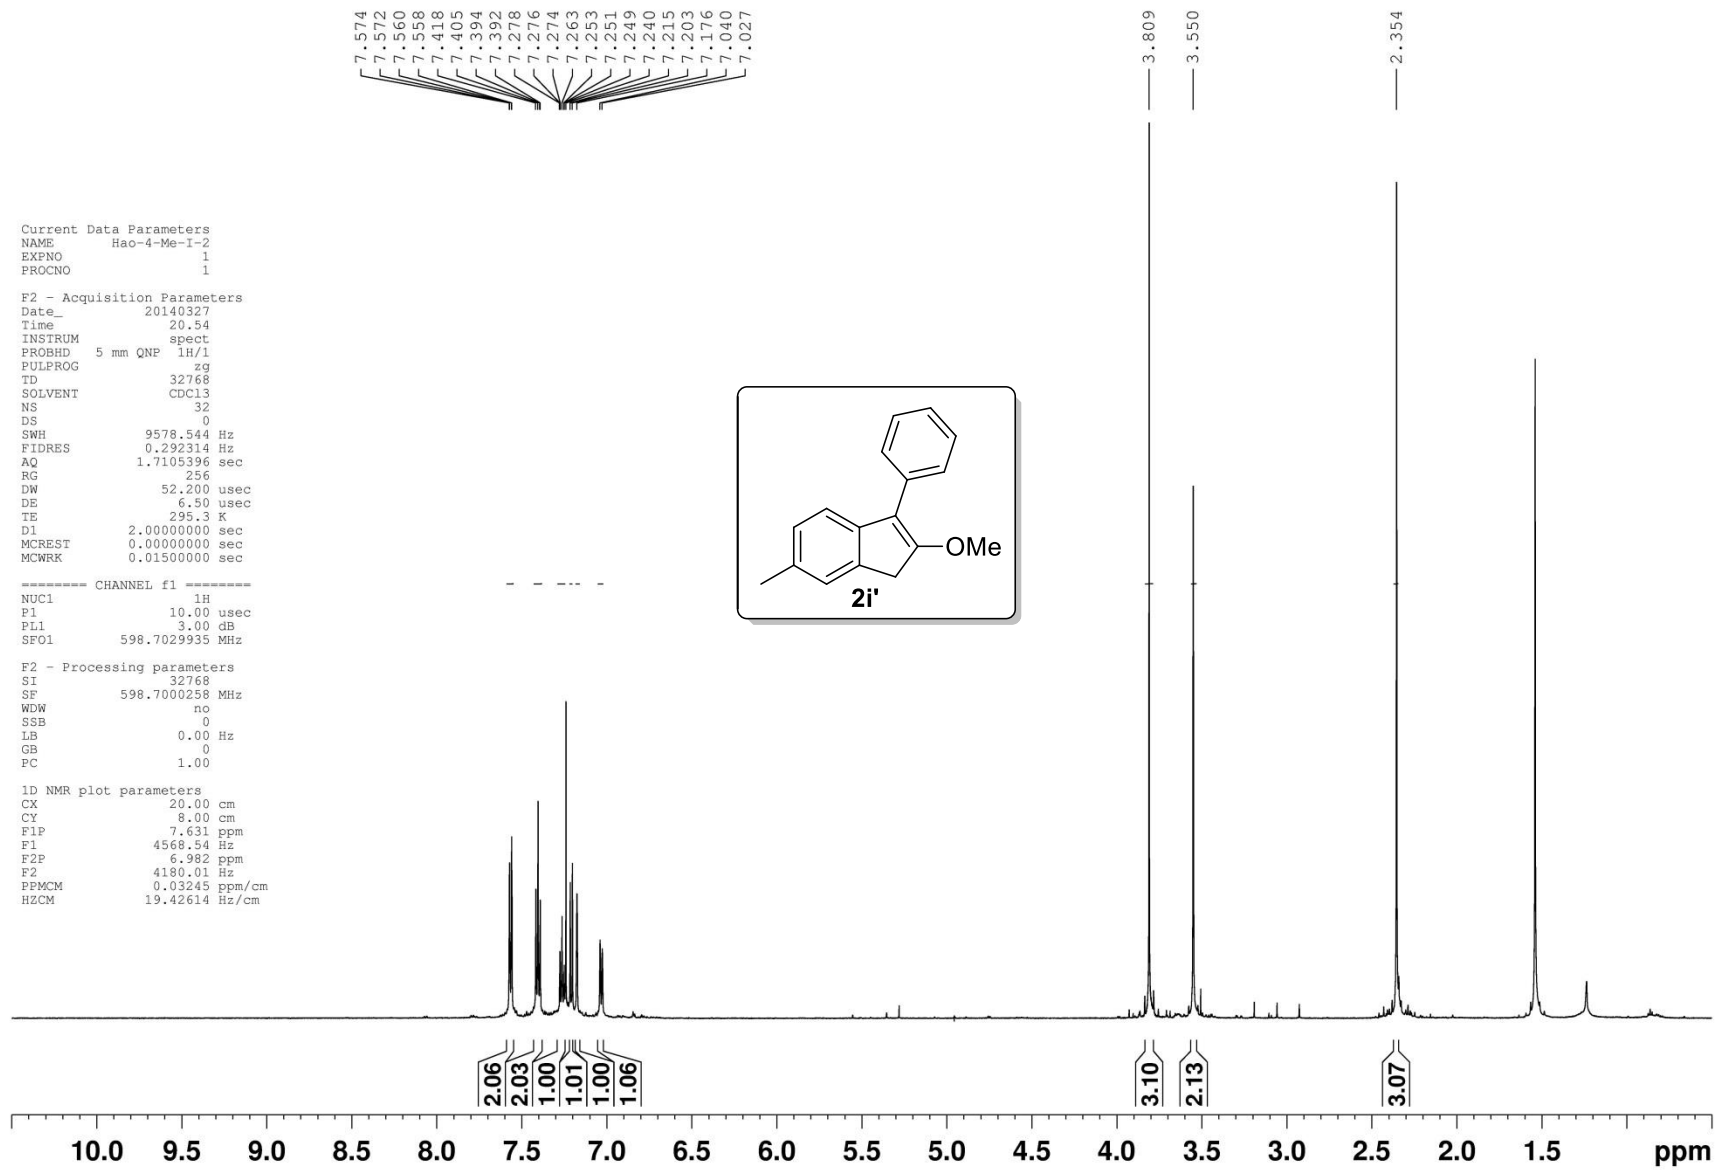

Current Data Parameters  
NAME 2014-03-26  
EXPNO 2  
PROCNO 1

F2 - Acquisition Parameters  
Date\_ 20140326  
Time 10.46  
INSTRUM spect  
PROBHD 5 mm QNP 1H/1  
PULPROG zgpg  
TD 32768  
SOLVENT CDCl3  
NS 446  
DS 0  
SWH 45045.047 Hz  
FIDRES 1.374666 Hz  
AQ 0.3637748 sec  
RG 270.00  
DWTW 11.100 usec  
DE 6.50 usec  
TE 296.4 K  
D1 3.50000000 sec  
d11 0.03000000 sec  
DELTA 3.40000010 sec  
MCREST 0 sec  
MCWRK 0.01500000 sec

===== CHANNEL f1 =====  
NUC1 13C  
P1 4.80 usec  
PL1 0 dB  
SFO1 150.5597948 MHz  
  
===== CHANNEL f2 =====  
CPDPRG2 waltz16  
NUC2 1H  
PCPD2 92.00 usec  
PL2 120.00 dB  
PL12 9.00 dB  
PL13 14.00 dB  
SFO2 598.7029935 MHz

F2 - Processing parameters  
SI 65536  
SF 150.5432493 MHz  
WDW EM  
SSB 0  
LB 3.00 Hz  
GB 0  
PC 1.00

159.49  
142.23  
135.72  
133.87  
132.16  
128.65  
128.17  
127.09  
126.40  
124.30  
118.04  
116.69  
77.14  
76.93  
76.72  
57.67  
34.88  
21.23

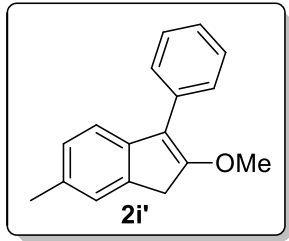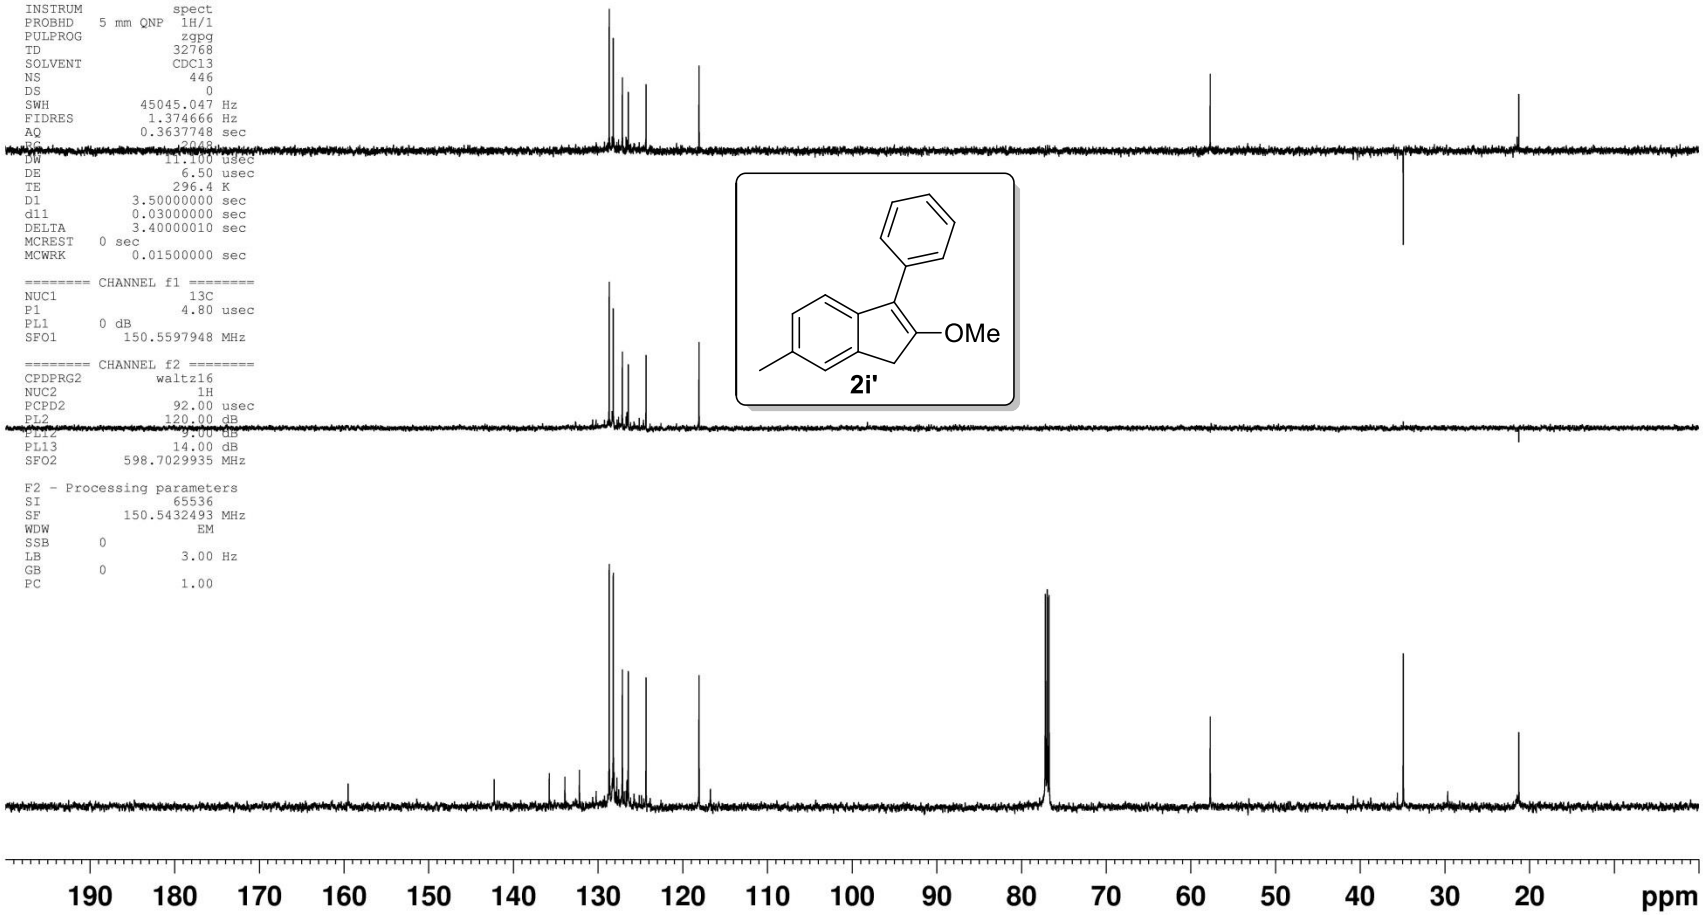

Current Data Parameters  
 NAME 2013-12-30  
 EXPNO 1  
 PROCNO 1

F2 - Acquisition Parameters  
 Date\_ 20131225  
 Time 13.16  
 INSTRUM spect  
 PROBHD 5 mm QNP 1H/1  
 PULPROG zg  
 TD 32768  
 SOLVENT CDCl3  
 NS 32  
 DS 0  
 SWH 8382.229 Hz  
 FIDRES 0.255805 Hz  
 AQ 1.9546613 sec  
 RG 128  
 DW 59.650 usec  
 DE 6.50 usec  
 TE 294.4 K  
 D1 2.0000000 sec  
 MCREST 0 sec  
 MCWRK 0.01500000 sec

----- CHANNEL f1 -----  
 NUC1 1H  
 P1 10.00 usec  
 PL1 0 dB  
 SFO1 598.7029935 MHz

F2 - Processing parameters  
 SI 32768  
 SF 598.7000261 MHz  
 WDW no  
 SSB 0  
 LB 0 Hz  
 GB 0  
 PC 1.00

7.575  
7.573  
7.562  
7.562  
7.560  
7.560  
7.417  
7.413  
7.412  
7.404  
7.393  
7.391  
7.279  
7.277  
7.276  
7.275  
7.267  
7.264  
7.263  
7.261  
7.256  
7.250  
7.240

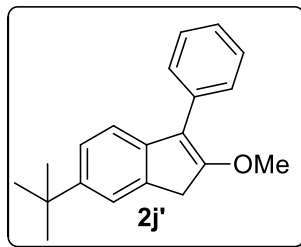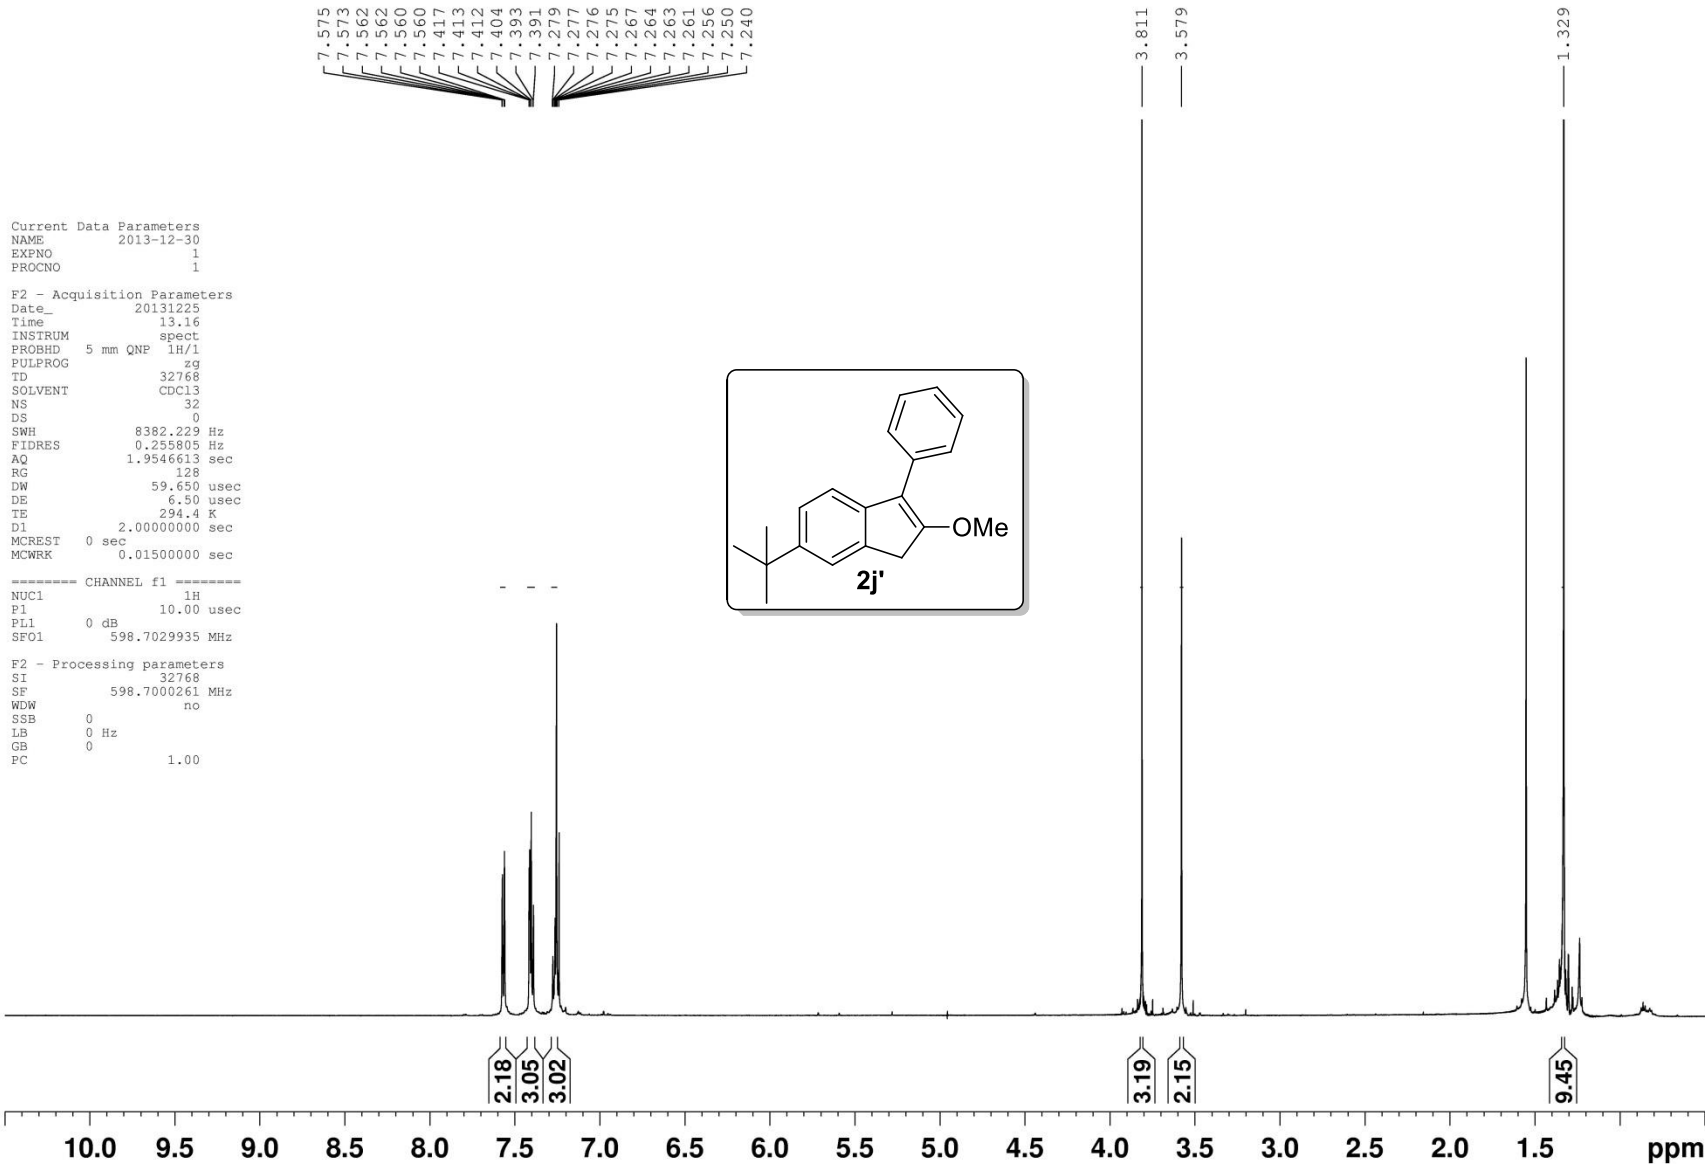



Current Data Parameters  
NAME 2013-12-30  
EXPNO 2  
PROCNO 1

F2 - Acquisition Parameters

Date\_ 20131225  
Time 13.20  
INSTRUM spect  
PROBHD 5 mm QNP 1H/1  
PULPROG zgpg  
TD 32768  
SOLVENT CDC13  
NS 5120  
DS 0  
SWH 45045.047 Hz  
FIDRES 1.374666 Hz  
AQ 0.3637748 sec  
RG 2048  
DW 11.100 usec  
DE 6.50 usec  
TE 295.1 K  
D1 3.50000000 sec  
d11 0.03000000 sec  
DELTA 3.40000010 sec  
MCREST 0 sec  
MCWRK 0.01500000 sec

===== CHANNEL f1 =====  
NUC1 13C  
P1 4.80 usec  
PL1 0 dB  
SFO1 150.5597948 MHz

===== CHANNEL f2 =====  
CPDPRG2 waltz16  
NUC2 1H  
PCPD2 92.00 usec  
PL2 120.00 dB  
PL12 9.00 dB  
PL13 14.00 dB  
SFO2 598.7029935 MHz

F2 - Processing parameters  
SI 65536  
SF 150.5432376 MHz  
WDW EM  
SSB 0  
LB 3.00 Hz  
GB 0  
PC 0.50

— 159.93

— 145.88

— 142.45

— 135.46

— 133.97

— 128.72

— 128.23

— 126.46

— 123.41

— 120.68

— 117.87

— 116.75

— 77.21

— 77.00

— 76.78

— 57.79

— 35.20

— 34.52

— 31.64

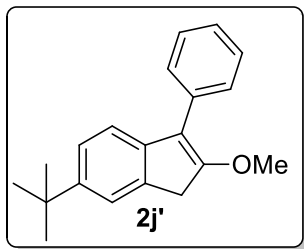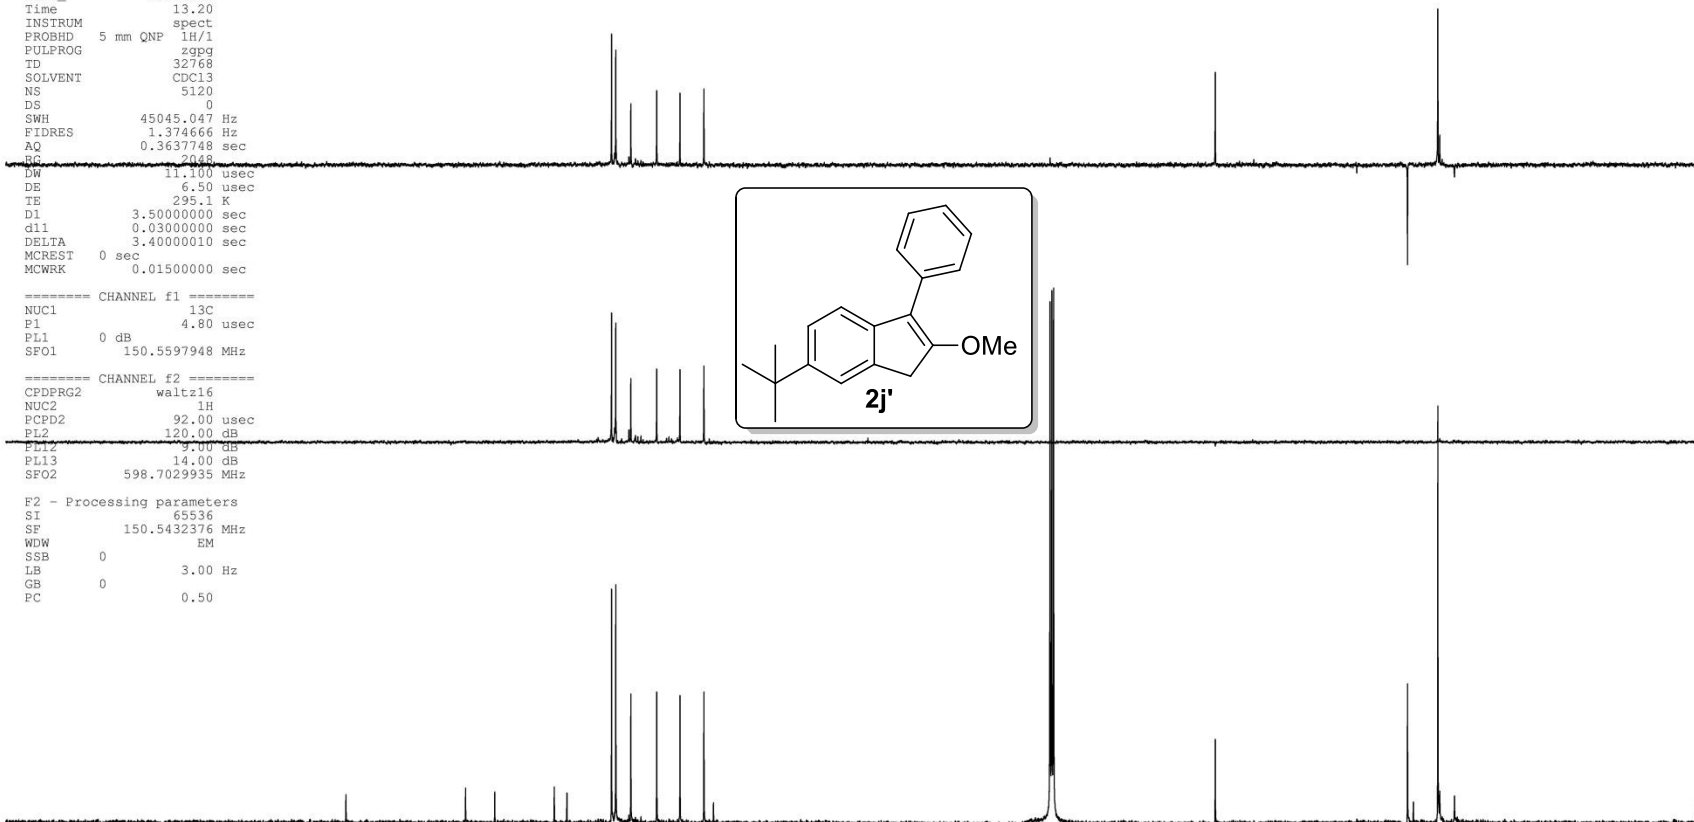

190 180 170 160 150 140 130 120 110 100 90 80 70 60 50 40 30 20 ppm

Current Data Parameters  
NAME 0425.fid  
EXPNO 1  
PROCNO 1  
F2 - Processing parameters  
SI 16384  
SF 499.8069129 MHz  
WDW EM  
SSB 0  
LB 0.30 Hz  
GB 0  
PC 1.00

7.414  
7.398  
7.237  
7.233  
7.223  
7.207  
7.024  
7.020  
7.008  
7.004

3.806

3.523

2.371

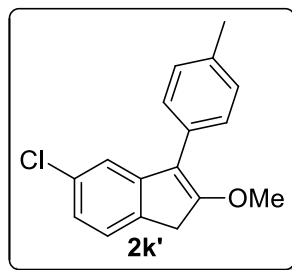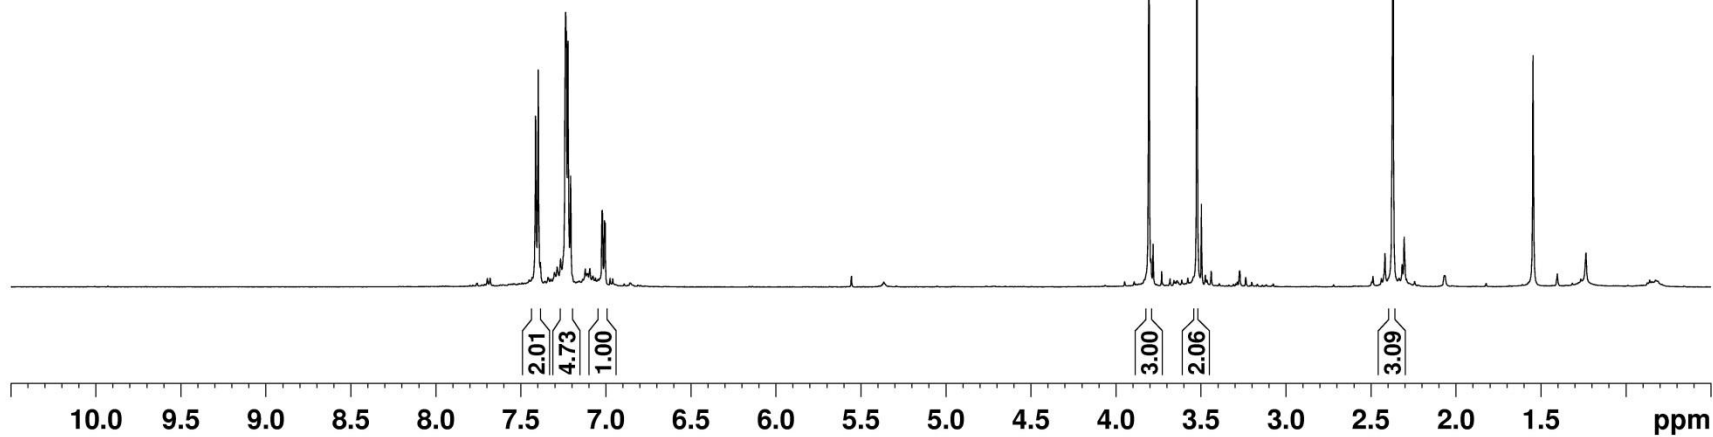

Current Data Parameters  
NAME 0425.fid  
EXPNO 2  
PROCNO 1

F2 - Processing parameters  
SI 65536  
SF 125.6794359 MHz  
WDW EM  
SSB 0  
LB 0.30 Hz  
GB 0  
PC 1.00

— 161.36

— 147.25

— 136.56

— 133.58

— 132.75

— 130.07

— 129.12

— 128.55

— 124.18

— 122.35

— 118.51

— 116.32

— 77.25

— 76.99

— 76.74

— 57.84

— 34.67

— 21.29

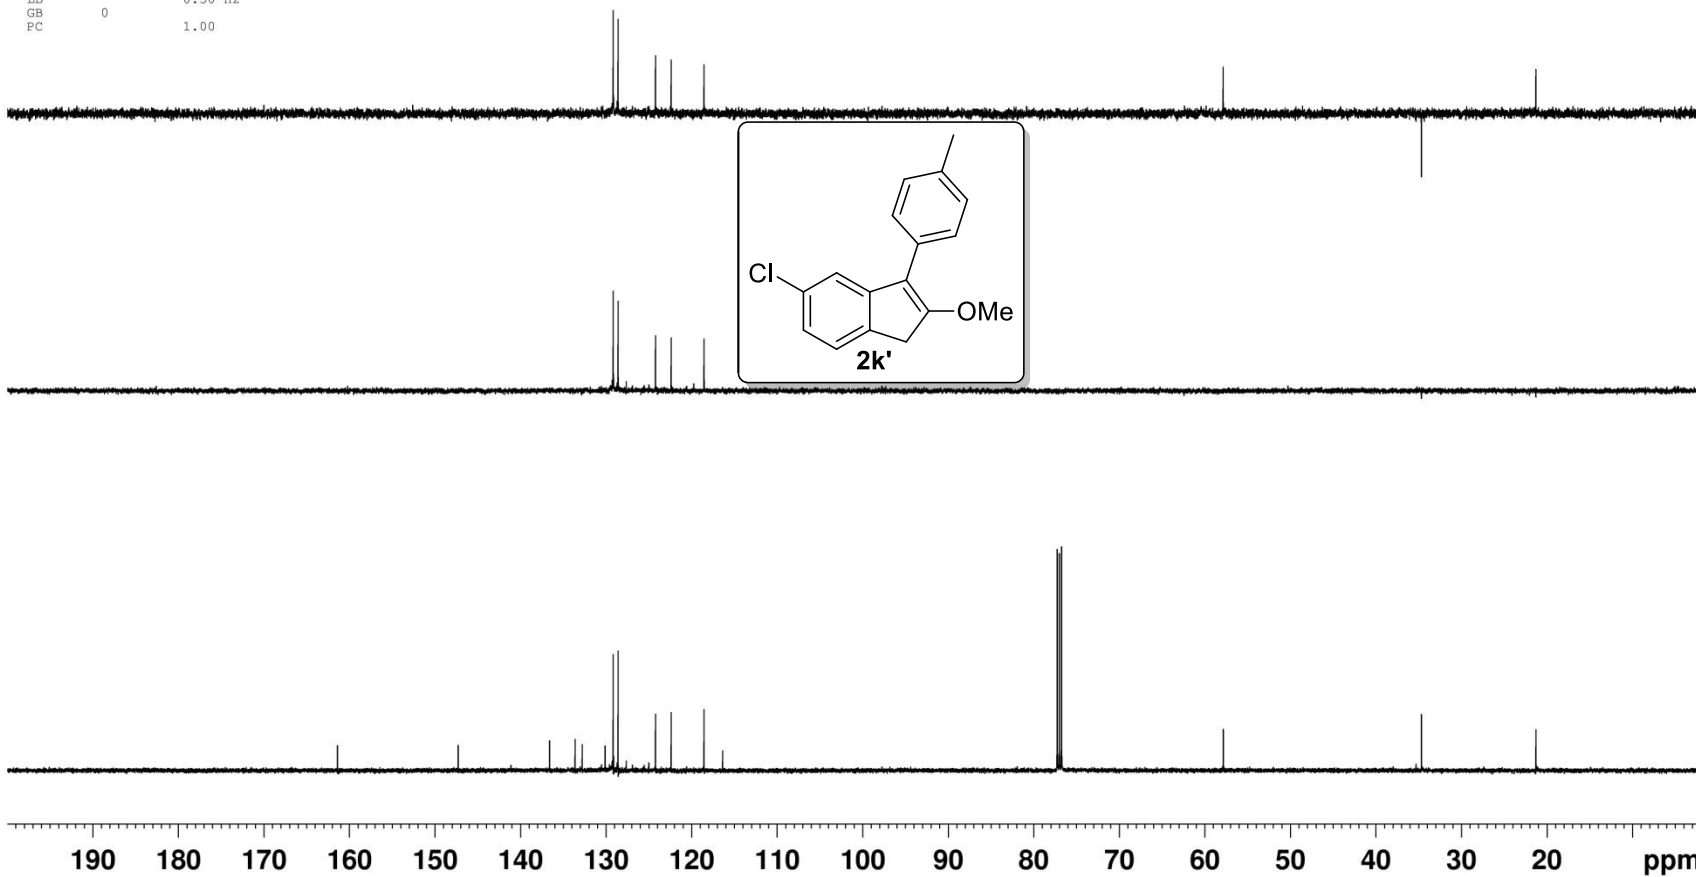

Current Data Parameters  
 NAME Hao-ph-cl-I-2  
 EXPNO 1  
 PROCNO 1

F2 - Acquisition Parameters  
 Date\_ 20140422  
 Time 13.21  
 INSTRUM spect  
 PROBHD 5 mm QNP 1H/1  
 PULPROG zg  
 TD 32768  
 SOLVENT CDCl3  
 NS 16  
 DS 0  
 SWH 8382.229 Hz  
 FIDRES 0.255805 Hz  
 AQ 1.9546613 sec  
 RG 32  
 DW 59.650 usec  
 DE 6.50 usec  
 TE 294.0 K  
 D1 2.0000000 sec  
 MCREST 0 sec  
 MCWRK 0.01500000 sec

----- CHANNEL f1 -----  
 NUC1 1H  
 P1 10.00 usec  
 PL1 3.00 dB  
 SFO1 598.7029935 Mhz

F2 - Processing parameters  
 SI 32768  
 SF 598.7000264 Mhz  
 WDW no  
 SSB 0  
 LB 0 Hz  
 GB 0  
 PC 1.00

7.472  
 7.458  
 7.393  
 7.379  
 7.379  
 7.240  
 7.228  
 7.217  
 7.214  
 7.045  
 7.042  
 7.032  
 7.029

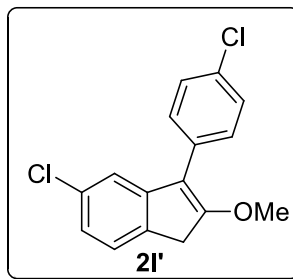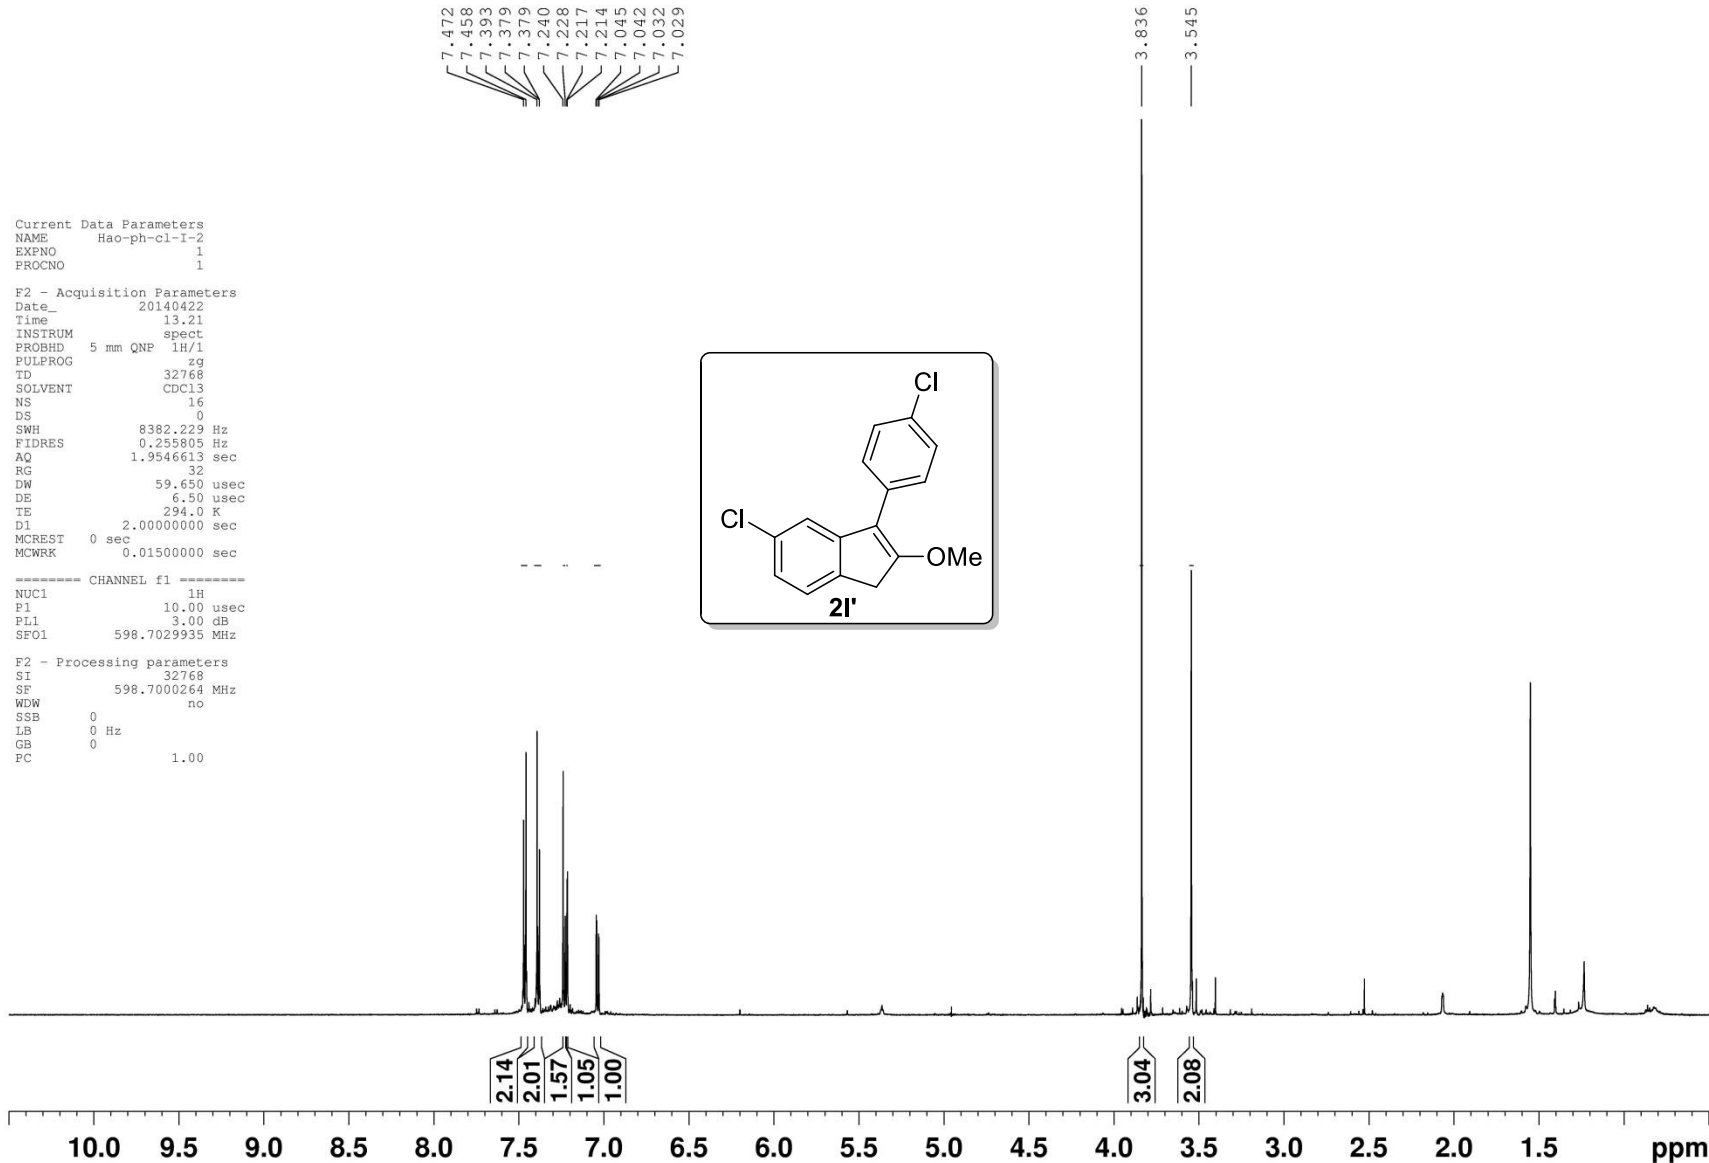

— 162.08

— 146.56

133.44

132.91

132.44

131.55

129.95

128.63

124.35

122.67

118.36

115.30

77.21

77.00

76.79

— 57.88

— 34.66

Current Data Parameters  
NAME Hao-ph-cl-I-2  
EXPNO 12  
PROCNO 1

F2 - Acquisition Parameters  
Date\_ 20140423  
Time 12.24  
INSTRUM spect  
PROBHD 5 mm QNP 1H/1  
PULPROG zgpg  
TD 32768  
SOLVENT CDCl3  
NS 309  
DS 0  
SWH 45045.047 Hz  
FIDRES 1.374666 Hz  
AQ 0.3637748 sec

DM 11.100 usec  
DE 6.50 usec  
TE 297.8 K  
D1 3.50000000 sec  
d11 0.03000000 sec  
DELTA 3.40000010 sec  
MCREST 0 sec  
MCWRK 0.01500000 sec

===== CHANNEL f1 =====  
NUC1 13C  
P1 4.80 usec  
PL1 0 dB  
SFO1 150.5597948 MHz

===== CHANNEL f2 =====  
CPDPRG2 waltz16  
NUC2 1H  
PCPD2 92.00 usec  
PL2 120.00 dB  
PL3 19.00 dB  
PL13 14.00 dB  
SFO2 598.7029935 MHz

F2 - Processing parameters  
SI 65536  
SF 150.5432363 MHz  
WDW EM  
SSB 0  
LB 3.00 Hz  
GB 0  
PC 1.00

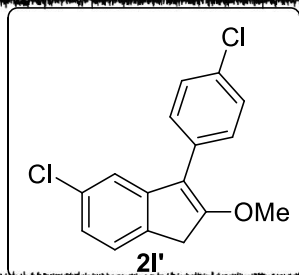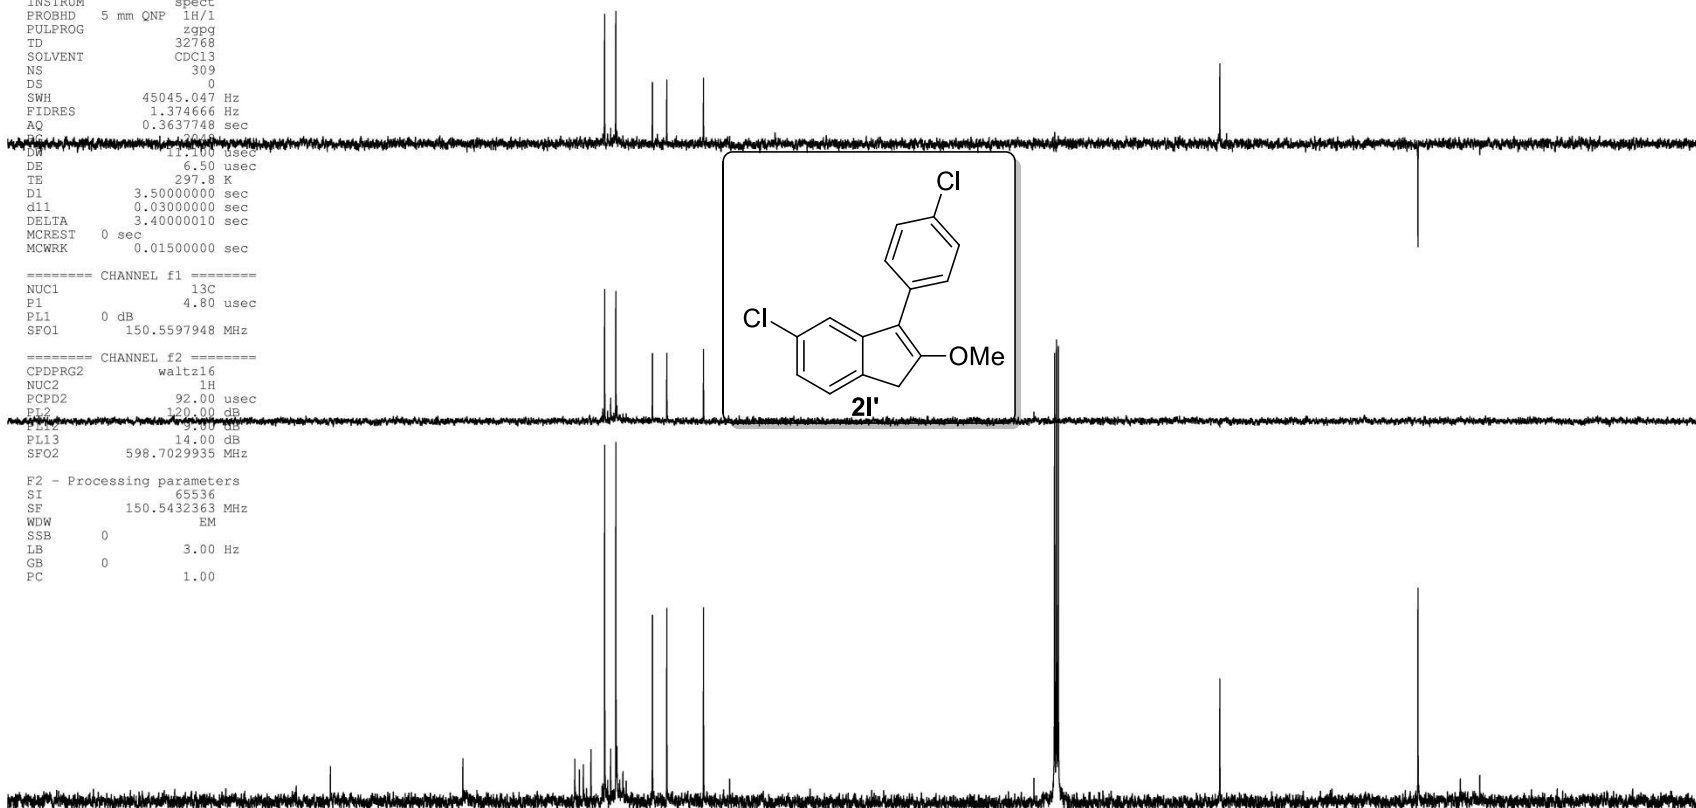

190 180 170 160 150 140 130 120 110 100 90 80 70 60 50 40 30 20 ppm

Current Data Parameters  
 NAME 2013-12-12-P  
 EXPNO 1  
 PROCNO 1

F2 - Acquisition Parameters  
 Date\_ 20131213  
 Time 11.17  
 INSTRUM spect  
 PROBHD 5 mm QNP 1H/1  
 PULPROG zg  
 TD 32768  
 SOLVENT CDCl3  
 NS 16  
 DS 0  
 SWH 8382.222 Hz  
 FIDRES 0.255805 Hz  
 AQ 1.9546632 sec  
 RG 512  
 DW 59.650 usec  
 DE 6.50 usec  
 TE 296.1 K  
 D1 2.0000000 sec  
 MCREST 0 sec  
 MCWRK 0.0150000 sec

----- CHANNEL f1 -----  
 NUC1 1H  
 P1 10.00 usec  
 PL1 0 dB  
 SFO1 598.7029935 MHz

F2 - Processing parameters  
 SI 32768  
 SF 598.7000264 MHz  
 WDW no  
 SSB 0  
 LB 0 Hz  
 GB 0  
 PC 1.00

7.384  
 7.381  
 7.371  
 7.368  
 7.326  
 7.321  
 7.314  
 7.308  
 7.304  
 7.301  
 7.270  
 7.261  
 7.258  
 7.255  
 7.246  
 7.240  
 7.213  
 7.120  
 7.118  
 7.106  
 7.105

4.653

3.607

1.280

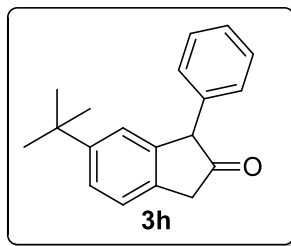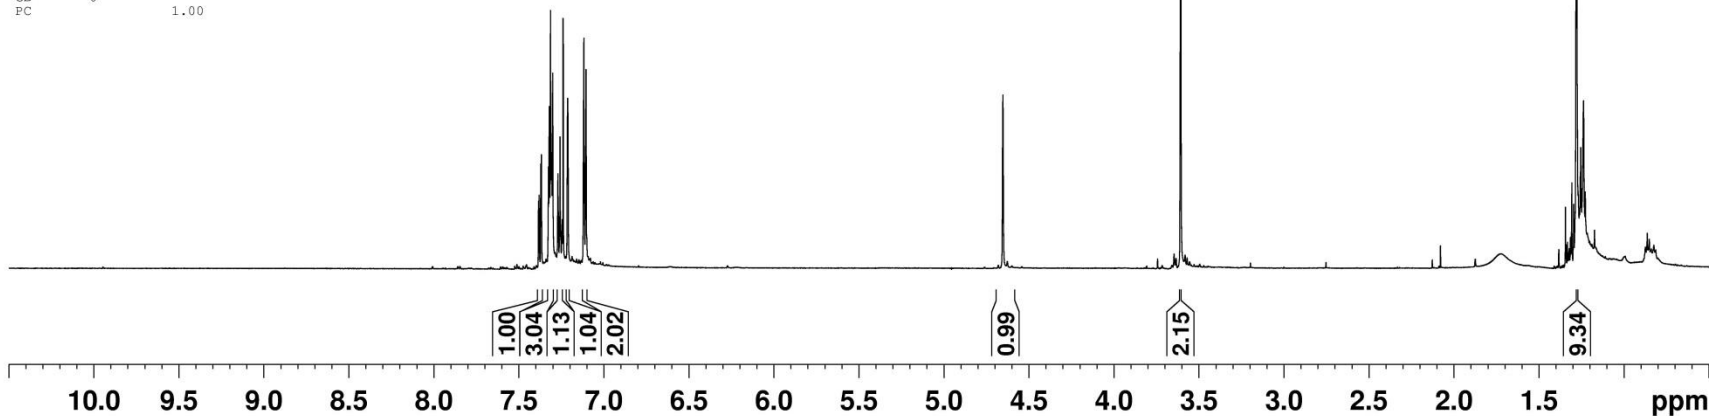

— 214.23

— 151.20

— 140.83

— 138.20

— 134.34

— 128.74

— 128.43

— 127.24

— 125.17

— 124.37

— 122.83

77.21

77.00

76.79

— 59.99

— 42.60

— 34.81

— 31.42

Current Data Parameters  
NAME 2013-12-12-P  
EXPNO 2  
PROCNO 1

F2 - Acquisition Parameters  
Date\_ 20131213  
Time 11.20  
INSTRUM spect  
PROBHD 5 mm QNP 1H/1  
PULPROG zgpg  
TD 32768  
SOLVENT CDCl3  
NS 955  
DS 0  
SWH 45045.047 Hz  
FIDRES 1.374666 Hz  
AQ 0.3637748 sec  
RG 2000  
DW 11.100 usec  
DE 6.50 usec  
TE 297.0 K  
D1 3.50000000 sec  
d11 0.03000000 sec  
DELTA 3.40000010 sec  
MCREST 0 sec  
MCWRK 0.01500000 sec

==== CHANNEL f1 =====  
NUC1 13C  
P1 4.80 usec  
PL1 0 dB  
SFO1 150.5597948 MHz

==== CHANNEL f2 =====  
CPDPRG2 waltz16  
NUC2 1H  
PCPD2 92.00 usec  
PL2 120.00 dB  
PL12 9.00 dB  
PL13 14.00 dB  
SFO2 598.7029935 MHz

F2 - Processing parameters  
SI 65536  
SF 150.5432376 MHz  
WDW EM  
SSB 0  
LB 3.00 Hz  
GB 0  
PC 0.50

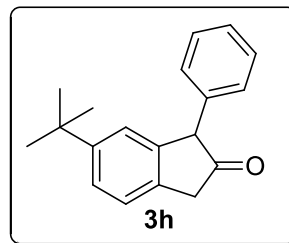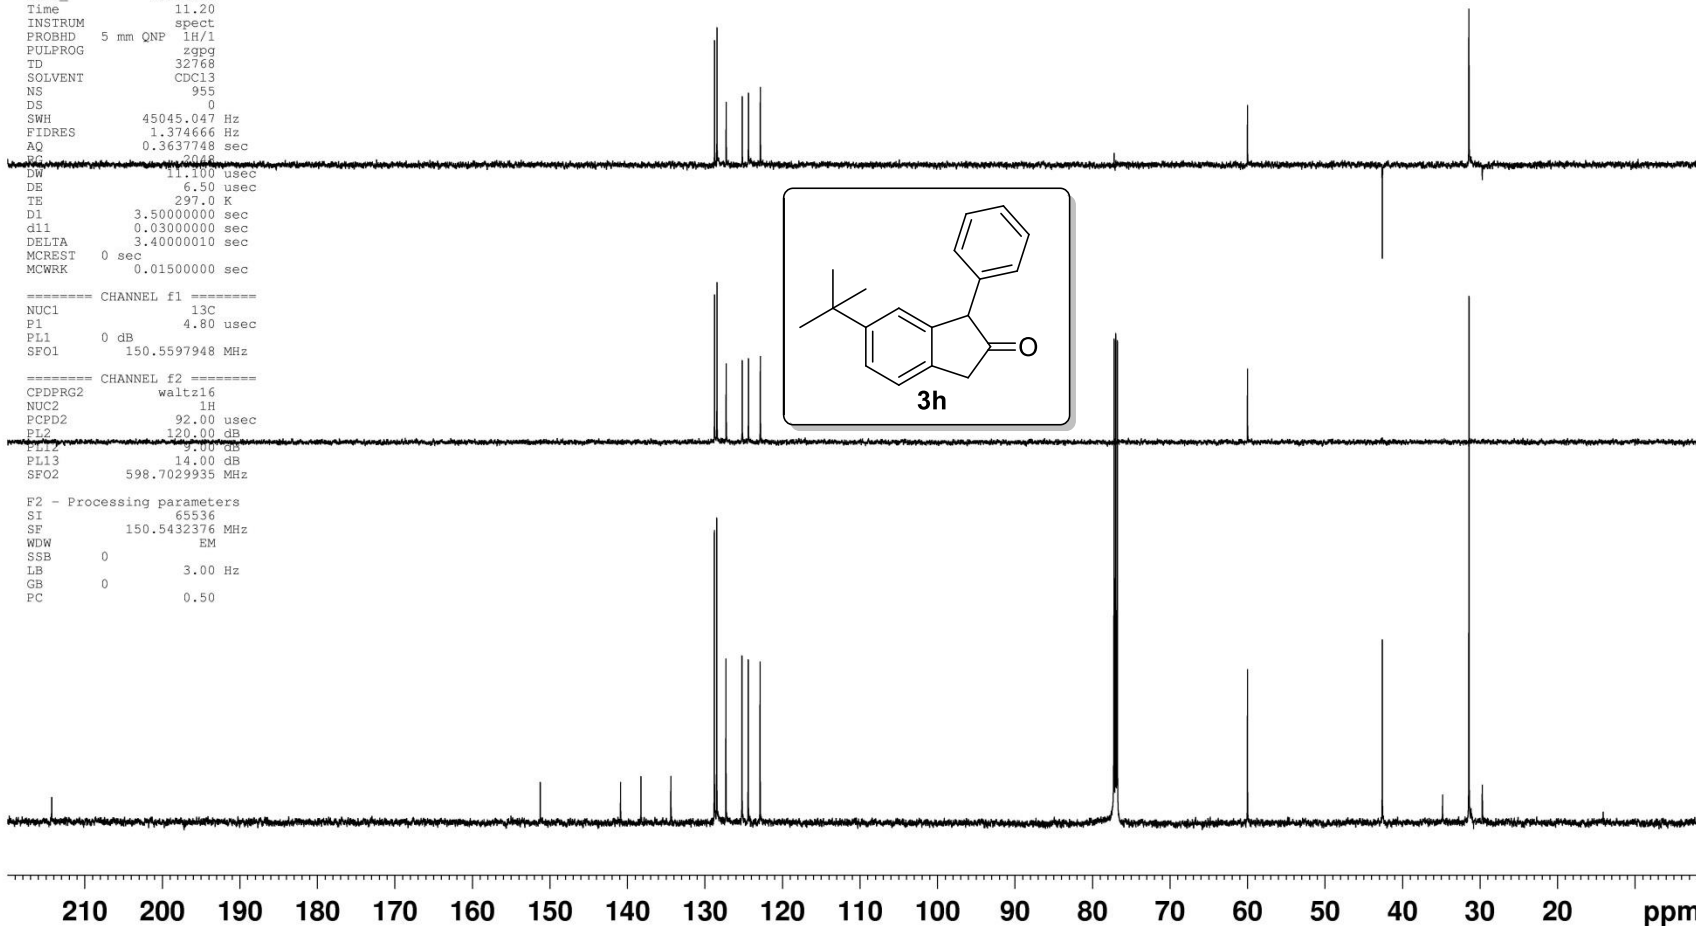

Current Data Parameters  
 NAME 2014-04-25-P  
 EXPNO 1  
 PROCNO 1

F2 - Acquisition Parameters  
 Date\_ 20140423  
 Time 7.46  
 INSTRUM spect  
 PROBHD 5 mm QNP 1H/1  
 PULPROG zg  
 TD 32768  
 SOLVENT CDCl3  
 NS 16  
 DS 0  
 SWH 8389.262 Hz  
 FIDRES 0.256020 Hz  
 AQ 1.9530228 sec  
 RG 128  
 DW 59.600 usec  
 DE 6.50 usec  
 TE 299.2 K  
 D1 2.0000000 sec  
 MCREST 0 sec  
 MCWRK 0.0150000 sec

----- CHANNEL f1 -----  
 NUC1 1H  
 P1 10.00 usec  
 PL1 3.00 dB  
 SFO1 598.7029935 Mhz

F2 - Processing parameters  
 SI 32768  
 SF 598.7000263 Mhz  
 WDW no  
 SSB 0  
 LB 0 Hz  
 GB 0  
 PC 1.00

7.300  
 7.299  
 7.297  
 7.296  
 7.294  
 7.293  
 7.240  
 7.157  
 7.156  
 7.155  
 7.153  
 7.134  
 7.121  
 6.962  
 6.949

4.596

3.604

2.314

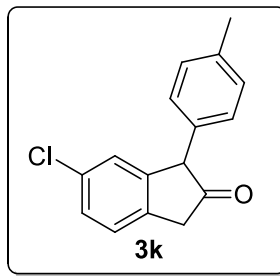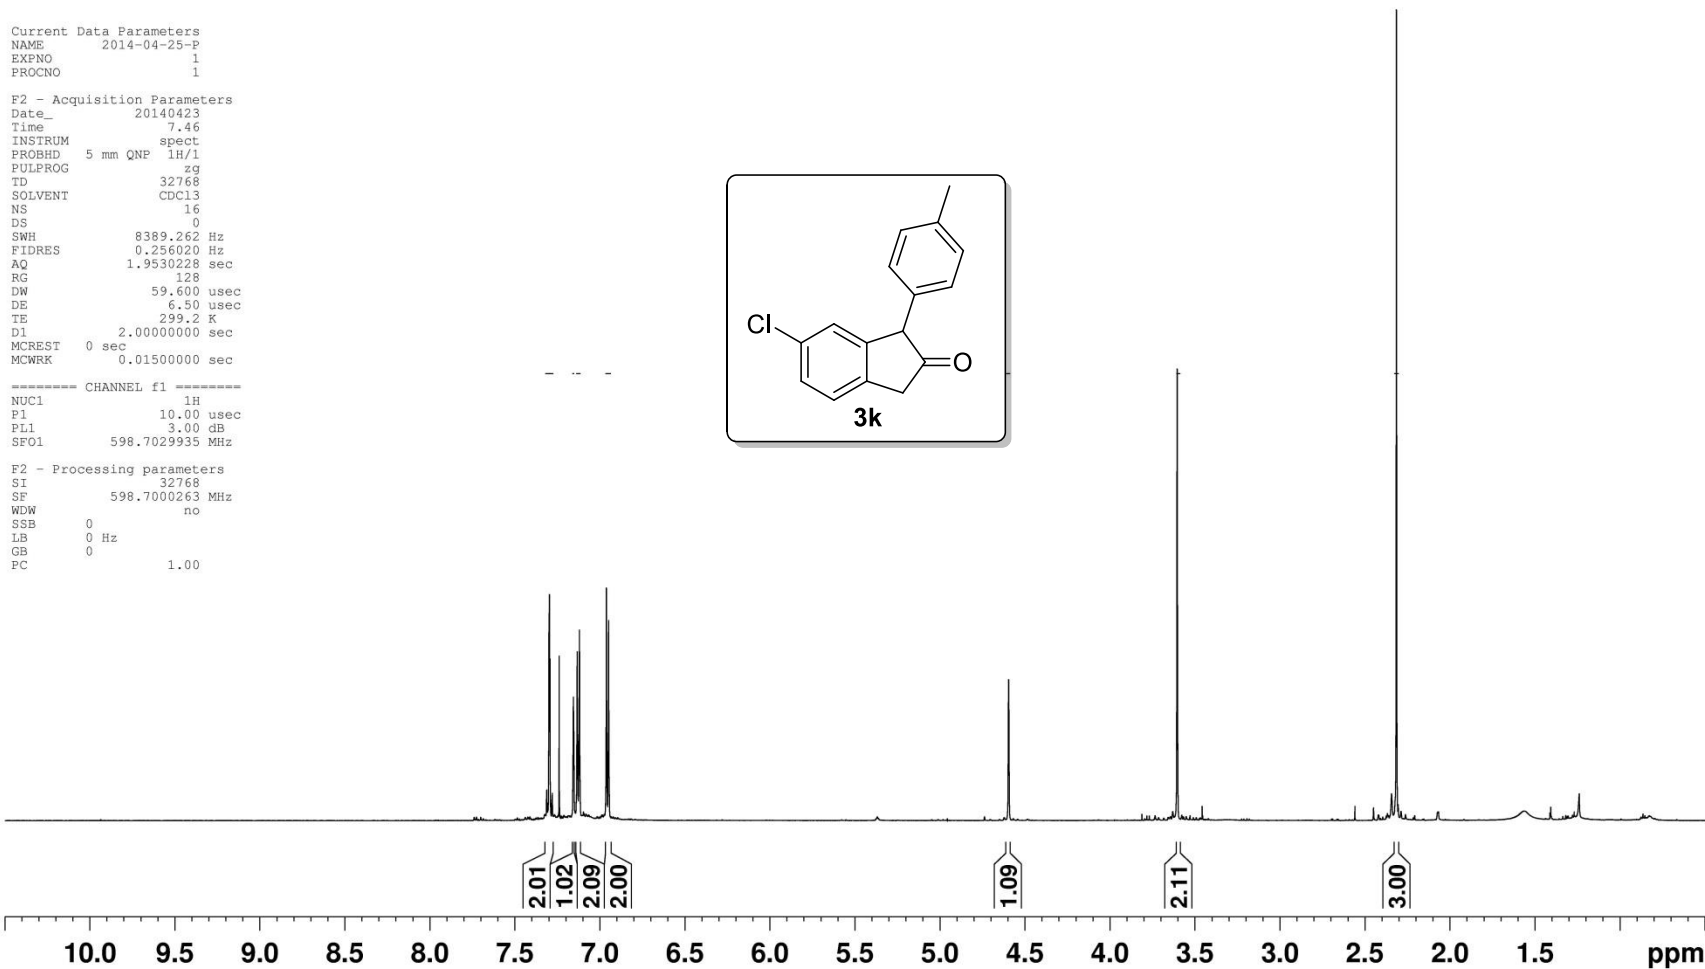



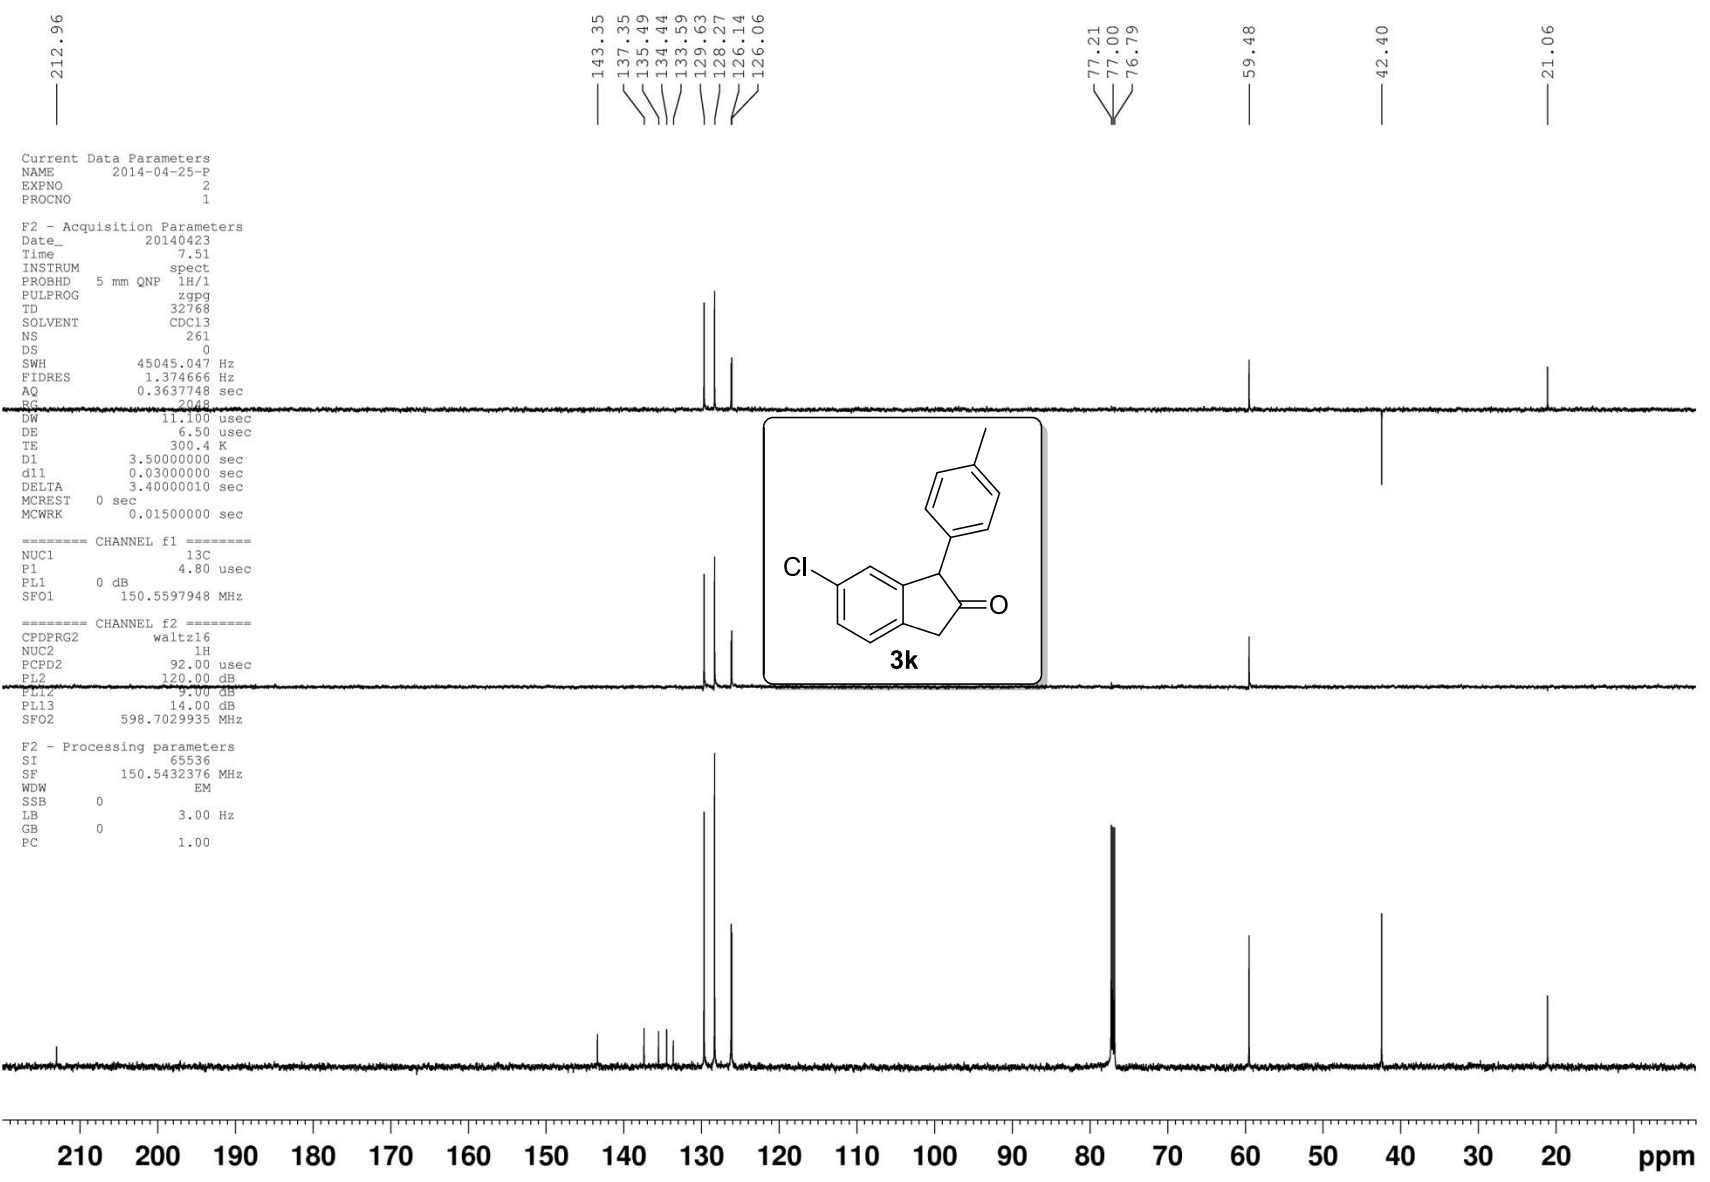

Current Data Parameters  
 NAME 2014-04-25-P  
 EXPNO 2  
 PROCNO 1

F2 - Acquisition Parameters  
 Date\_ 20140423  
 Time 7.51  
 INSTRUM spect  
 PROBHD 5 mm QNP 1H/1  
 PULPROG zgpg  
 TD 32768  
 SOLVENT CDCl3  
 NS 261  
 DS 0  
 SWH 45045.047 Hz  
 FIDRES 1.374666 Hz  
 AQ 0.3637748 sec  
 RG 2048  
 DW 11.100 usec  
 DE 6.50 usec  
 TE 300.4 K  
 D1 3.50000000 sec  
 d11 0.03000000 sec  
 DELTA 3.40000010 sec  
 MCREST 0 sec  
 MCWRK 0.01500000 sec

===== CHANNEL f1 =====  
 NUC1 13C  
 P1 4.80 usec  
 PL1 0 dB  
 SFO1 150.5597948 MHz

===== CHANNEL f2 =====  
 CPDPRG2 waltz16  
 NUC2 1H  
 PCPD2 92.00 usec  
 PL2 120.00 dB  
 PL12 9.00 dB  
 PL13 14.00 dB  
 SFO2 598.7029935 MHz

F2 - Processing parameters  
 SI 65536  
 SF 150.5432376 MHz  
 WDW EM  
 SSB 0  
 LB 3.00 Hz  
 GB 0  
 PC 1.00

212.96

143.35  
 137.35  
 135.49  
 134.44  
 133.59  
 129.63  
 128.27  
 126.14  
 126.06

77.21  
 77.00  
 76.79

59.48

42.40

21.06

210 200 190 180 170 160 150 140 130 120 110 100 90 80 70 60 50 40 30 20 ppm

Current Data Parameters  
NAME 0426.fid  
EXPNO 1  
PROCNO 1  
F2 - Processing parameters  
SI 16384  
SF 499.8069099 MHz  
WDW EM  
SSB 0  
LB 0.30 Hz  
GB 0  
PC 1.00

7.314  
7.301  
7.284  
7.239  
7.137  
7.019  
7.003

4.612

3.613

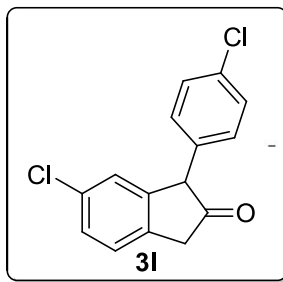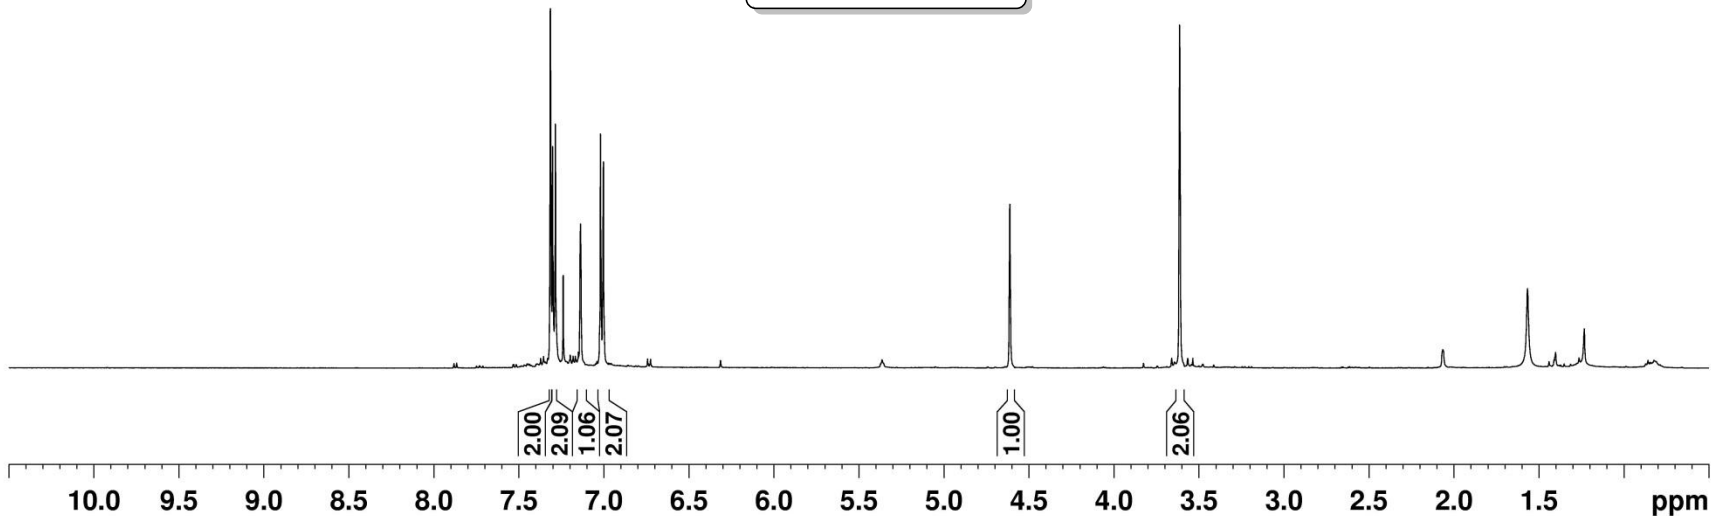

— 212.19

142.44  
135.68  
135.46  
133.73  
133.63  
129.72  
129.08  
128.60  
126.21  
126.06

77.24  
76.98  
76.73

— 59.03

— 42.35

Current Data Parameters  
NAME 0426.fid  
EXPNO 2  
PROCNO 1  
  
F2 - Processing parameters  
SI 65536  
SF 125.6794370 MHz  
WDW EM  
SSB 0  
LB 0.30 Hz  
GB 0  
PC 1.00

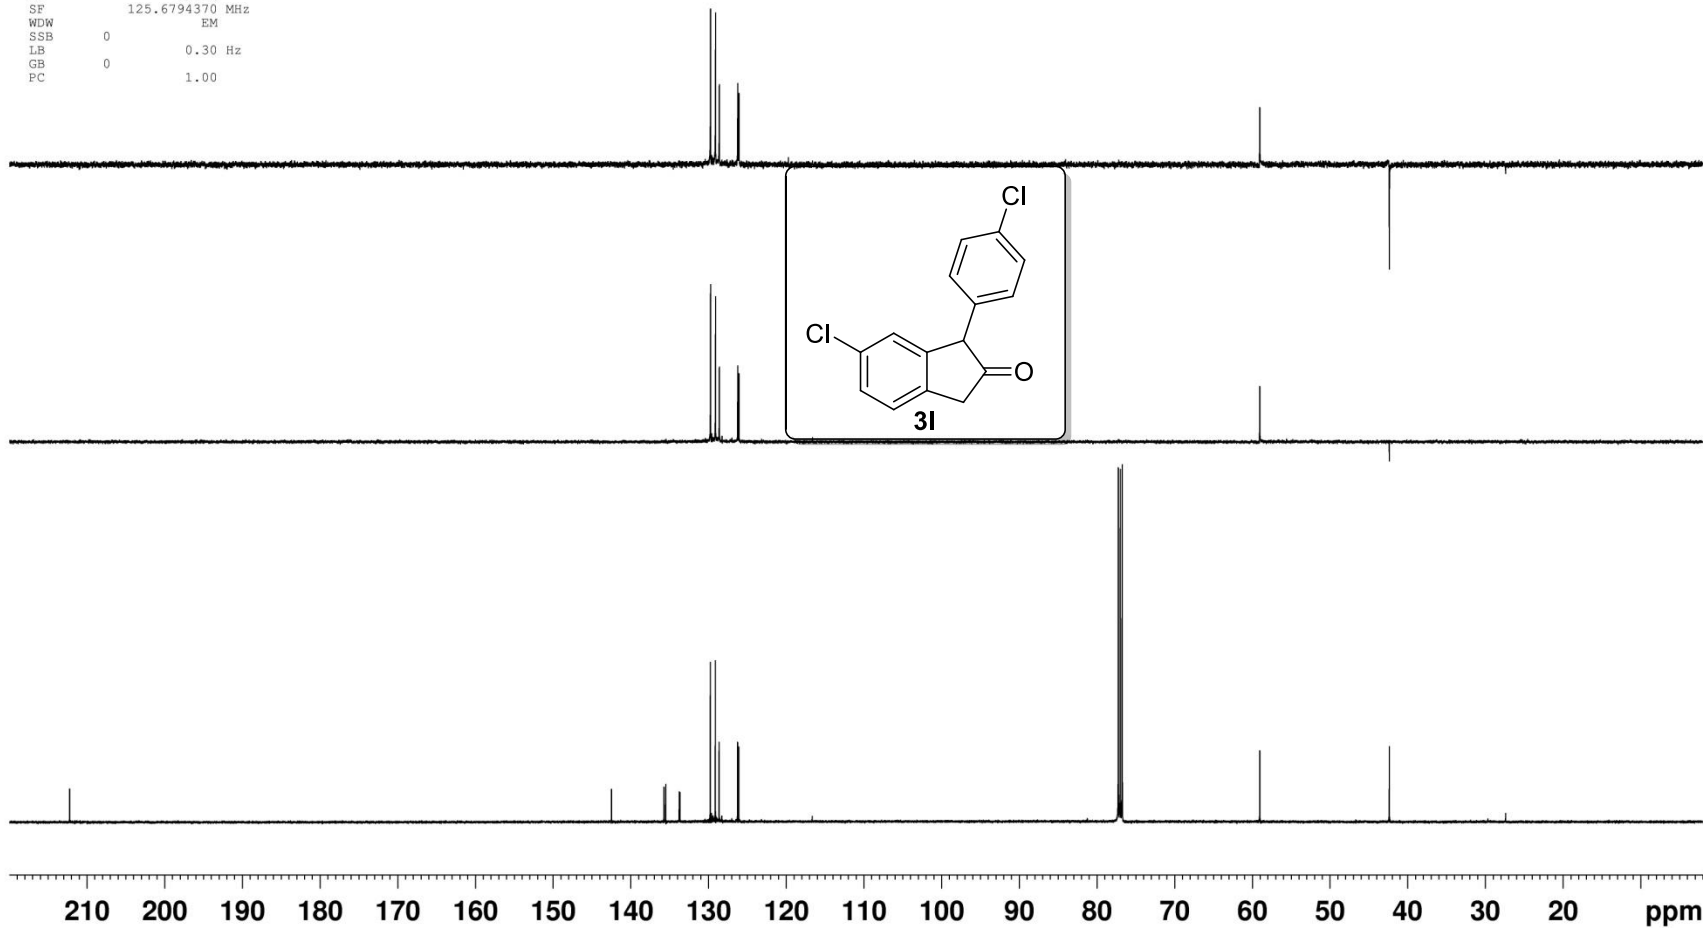

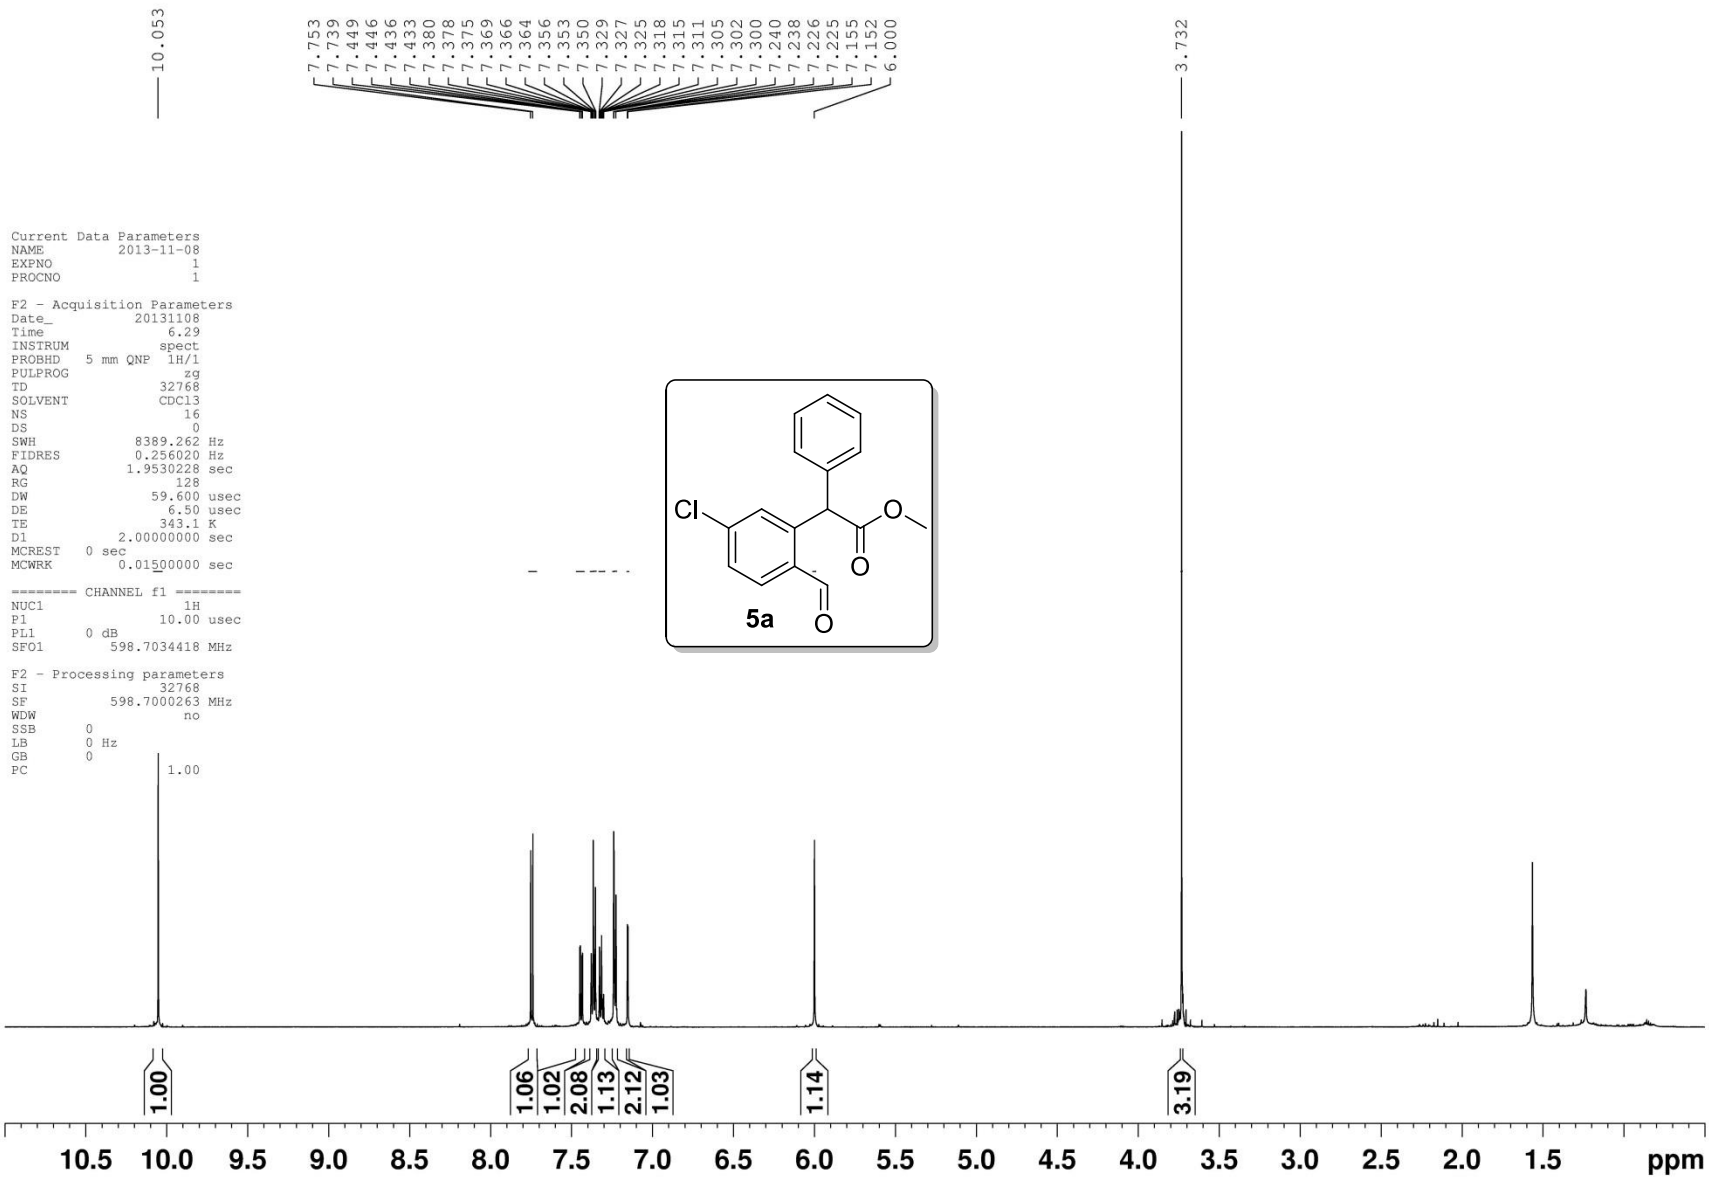

Current Data Parameters  
 NAME 2013-11-08  
 EXPNO 1  
 PROCNO 1

F2 - Acquisition Parameters  
 Date\_ 20131108  
 Time 6.29  
 INSTRUM spect  
 PROBHD 5 mm QNP 1H/1  
 PULPROG zg  
 TD 32768  
 SOLVENT CDCl3  
 NS 16  
 DS 0  
 SWH 8389.262 Hz  
 FIDRES 0.256020 Hz  
 AQ 1.9530228 sec  
 RG 128  
 DW 59.600 usec  
 DE 6.50 usec  
 TE 343.1 K  
 D1 2.0000000 sec  
 MCREST 0 sec  
 MCWRK 0.01500000 sec

----- CHANNEL f1 -----  
 NUC1 1H  
 P1 10.00 usec  
 PL1 0 dB  
 SFO1 598.7034418 MHz

F2 - Processing parameters  
 SI 32768  
 SF 598.7000263 MHz  
 WDW no  
 SSB 0  
 LB 0 Hz  
 GB 0  
 PC 1.00

7.753  
7.739  
7.449  
7.446  
7.436  
7.433  
7.380  
7.378  
7.375  
7.369  
7.366  
7.364  
7.356  
7.353  
7.350  
7.329  
7.327  
7.325  
7.318  
7.315  
7.311  
7.305  
7.302  
7.300  
7.240  
7.238  
7.226  
7.225  
7.155  
7.152  
6.000

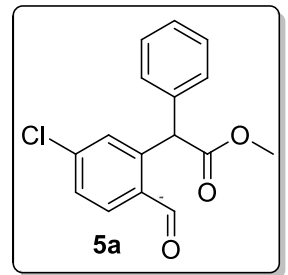

1.00

1.06  
1.02  
2.08  
1.13  
2.12  
1.03

1.14

3.19

10.5 10.0 9.5 9.0 8.5 8.0 7.5 7.0 6.5 6.0 5.5 5.0 4.5 4.0 3.5 3.0 2.5 2.0 1.5 ppm

192.00

172.34

141.87  
140.50  
136.76  
136.16  
132.12  
130.80  
129.05  
129.01  
128.03  
127.84

77.21  
77.00  
76.79

52.53  
52.51

Current Data Parameters  
NAME 2013-11-08  
EXPNO 2  
PROCNO 1

F2 - Acquisition Parameters  
Date\_ 20131108  
Time 6.29  
INSTRUM spect  
PROBHD 5 mm QNP 1H/1  
PULPROG zgpg  
TD 32768  
SOLVENT CDCl3  
NS 400  
DS 0  
SWH 45045.047 Hz  
FIDRES 1.374666 Hz  
AQ 0.3637748 sec  
RG 2048  
DW 11.100 usec  
DE 6.50 usec  
TE 343.1 K  
D1 3.50000000 sec  
d11 0.03000000 sec  
DELTA 3.40000010 sec  
MCREST 0 sec  
MCWRK 0.01500000 sec

----- CHANNEL f1 -----  
NUC1 13C  
P1 4.80 usec  
PL1 0 dB  
SFO1 150.5597948 MHz

----- CHANNEL f2 -----  
CPDPRG2 waltz16  
NUC2 1H  
PCPD2 92.00 usec  
P2 120.00 dB  
PL2 9.00 dB  
PL3 14.00 dB  
SFO2 598.7029935 MHz

F2 - Processing parameters  
SI 65536  
SF 150.5432383 MHz  
WDW EM  
SSB 0  
LB 1.00 Hz  
GB 0  
PC 2.00

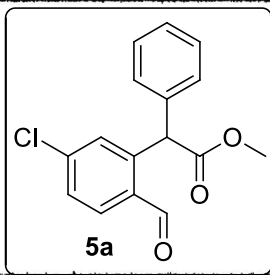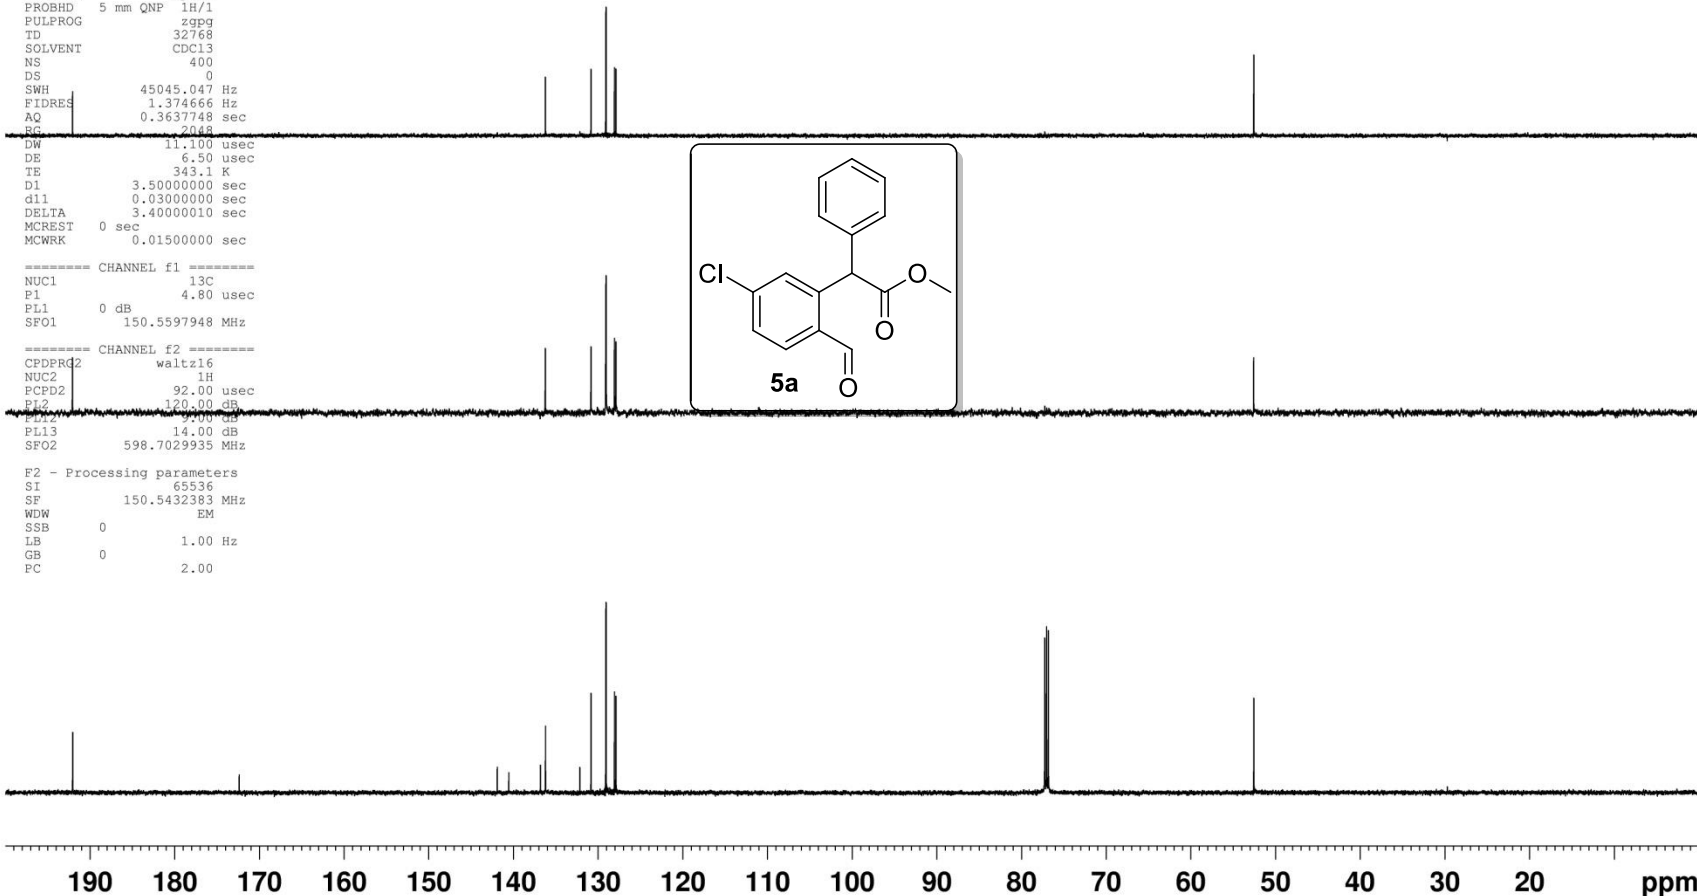

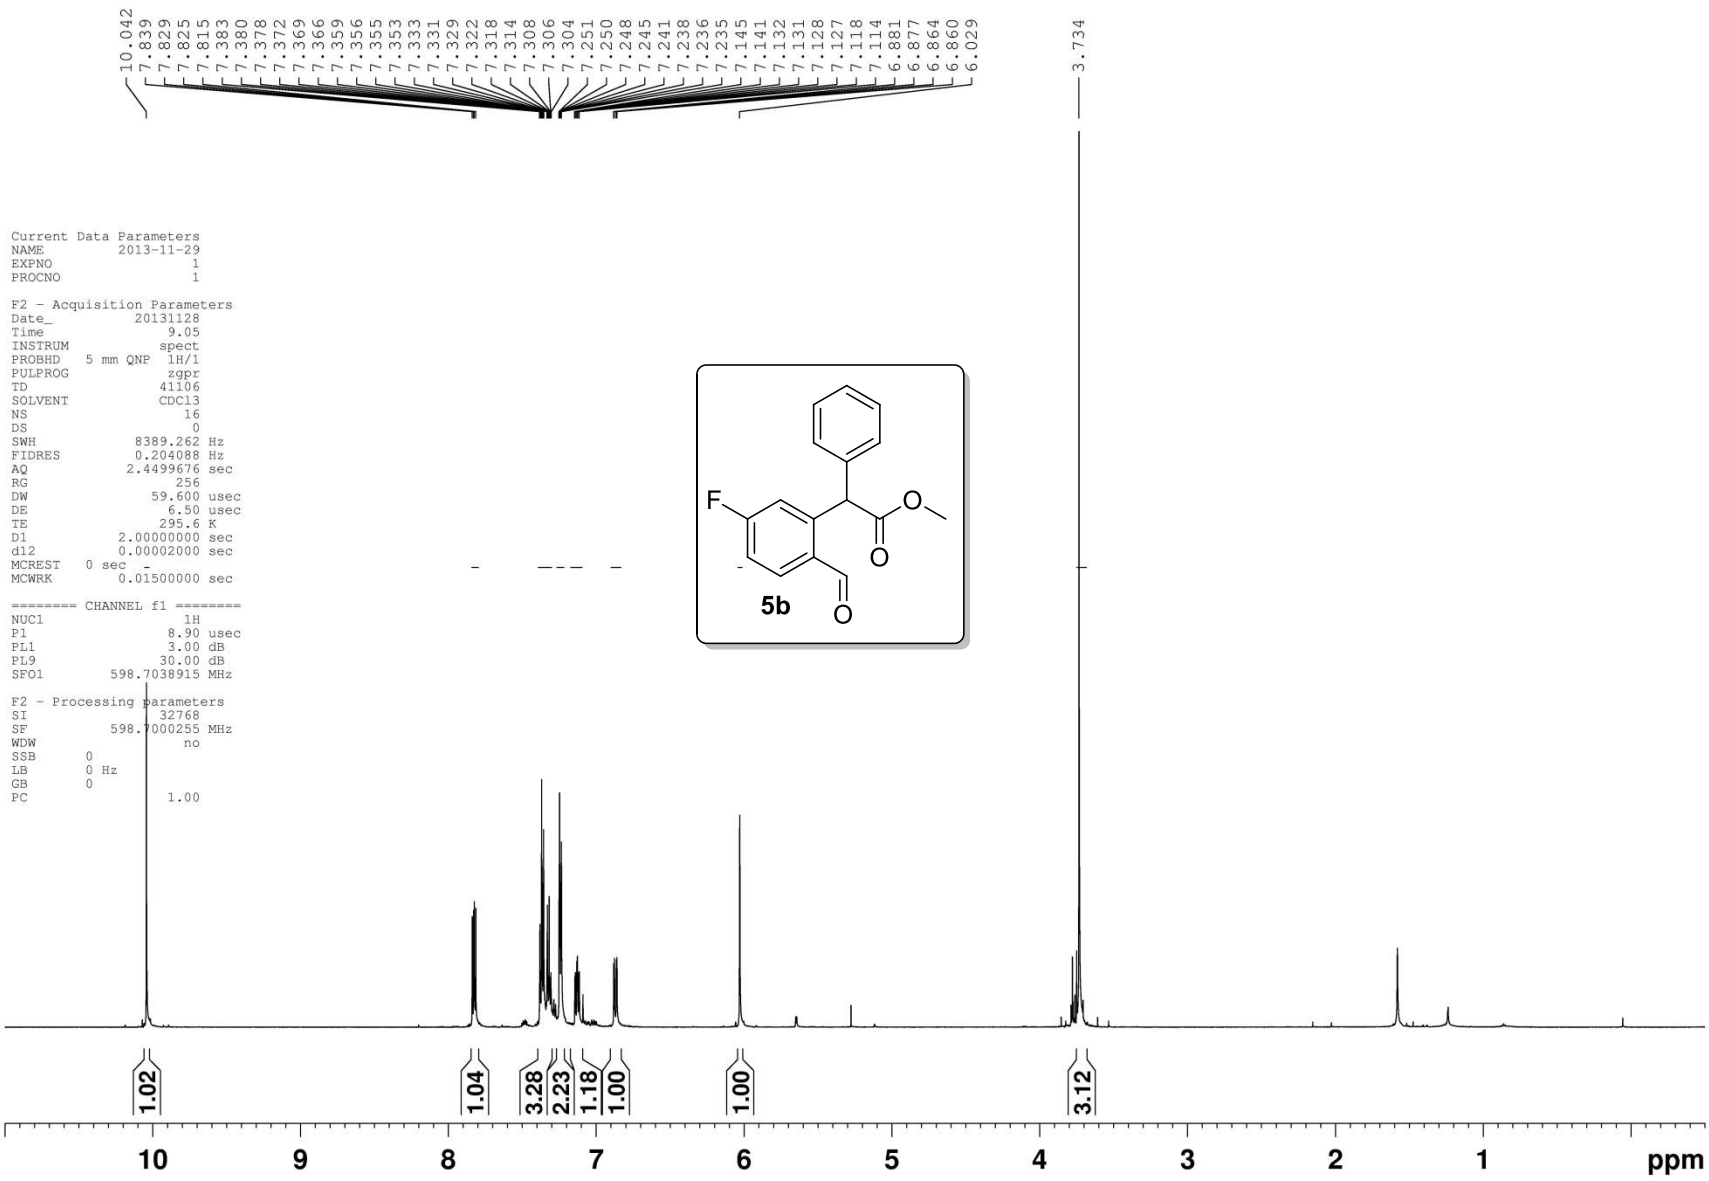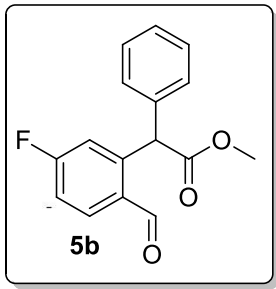

Current Data Parameters  
 NAME 2013-11-29  
 EXPNO 2  
 PROCNO 1

F2 - Acquisition Parameters  
 Date\_ 20131128  
 Time 9.22  
 INSTRUM spect  
 PROBHD 5 mm QNP 1H/1  
 PULPROG zgpg  
 TD 32768  
 SOLVENT CDCl3  
 NS 300  
 DS 0  
 SWH 45045.047 Hz  
 FIDRES 1.374666 Hz  
 AQ 0.3637748 sec  
 RG 7048  
 DW 11.100 usec  
 DE 6.50 usec  
 TE 296.9 K  
 D1 3.50000000 sec  
 d11 0.03000000 sec  
 DELTA 3.40000010 sec  
 MCREST 0 sec  
 MCWRK 0.01500000 sec

----- CHANNEL f1 -----  
 NUC1 13C  
 P1 4.80 usec  
 PL1 0 dB  
 SFO1 150.5597948 MHz

----- CHANNEL f2 -----  
 CPDPRG2 waltz16  
 NUC2 1H  
 PCPD2 92.00 usec  
 PL2 120.00 dB  
 PL12 9.00 dB  
 PL13 14.00 dB  
 SFO2 598.7029935 MHz

F2 - Processing parameters  
 SI 65536  
 SF 150.5432397 MHz  
 WDW EM  
 SSB 0  
 LB 3.00 Hz  
 GB 0  
 PC 0.50

143.67  
 143.61  
 137.86  
 137.79  
 136.80  
 130.35  
 129.04  
 129.02  
 127.84

118.30  
 118.14  
 114.76  
 114.62

77.21  
 77.00  
 76.79

52.65  
 52.47

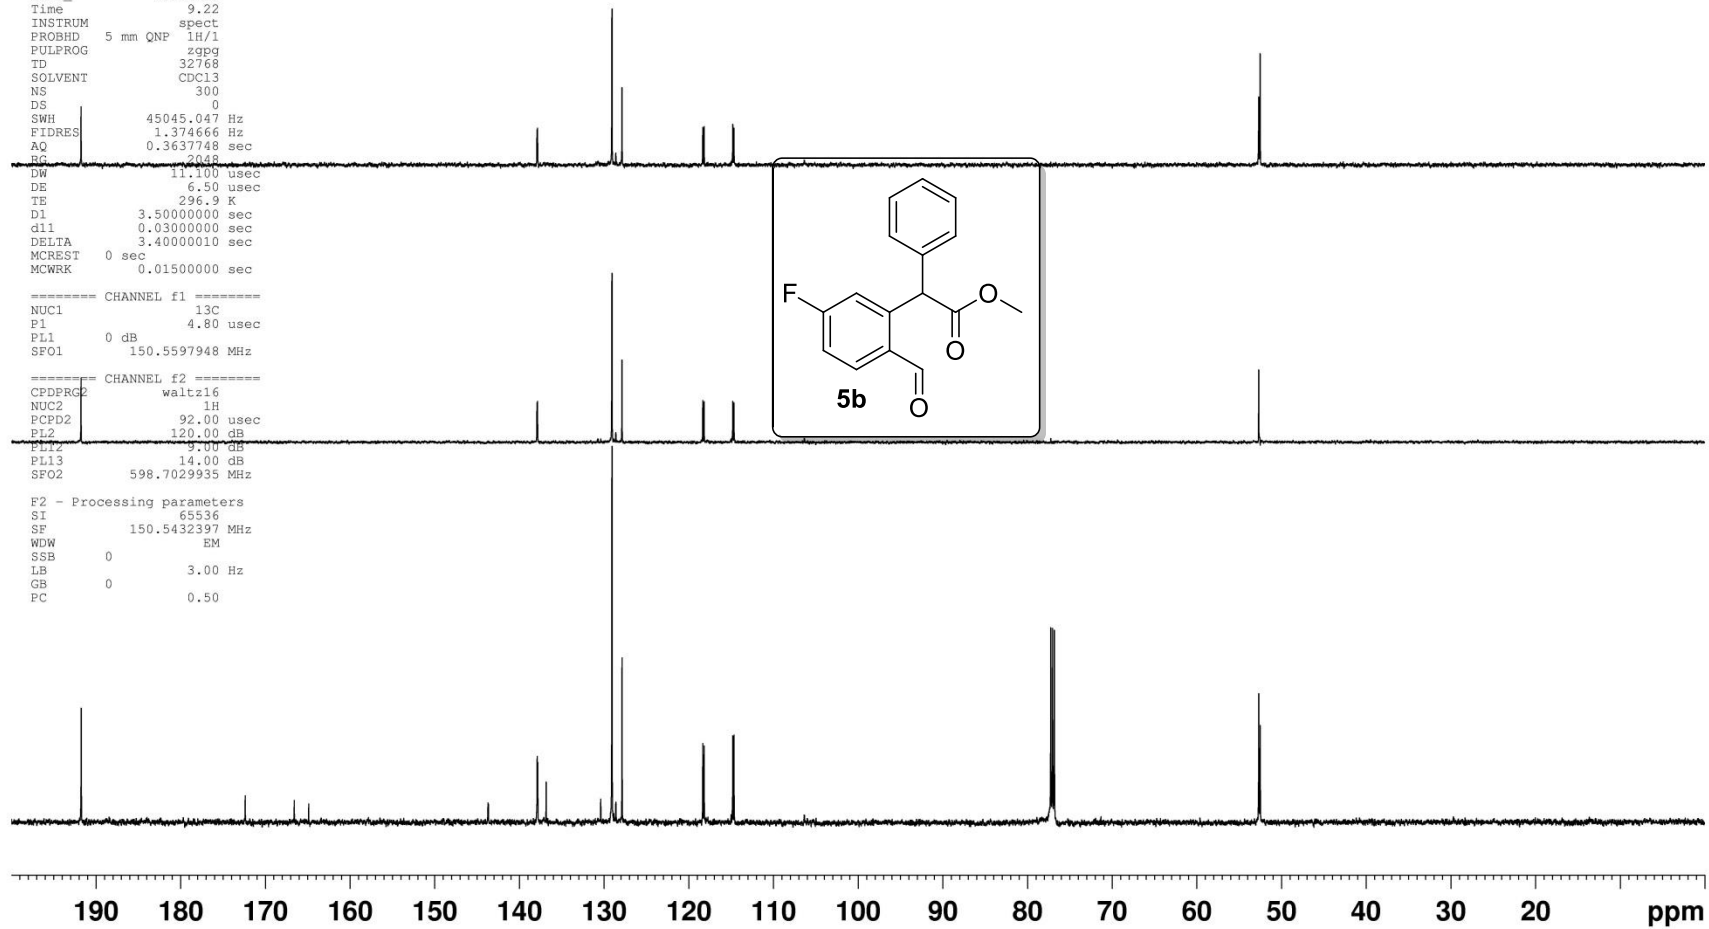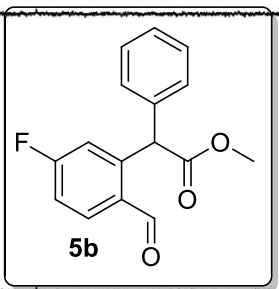

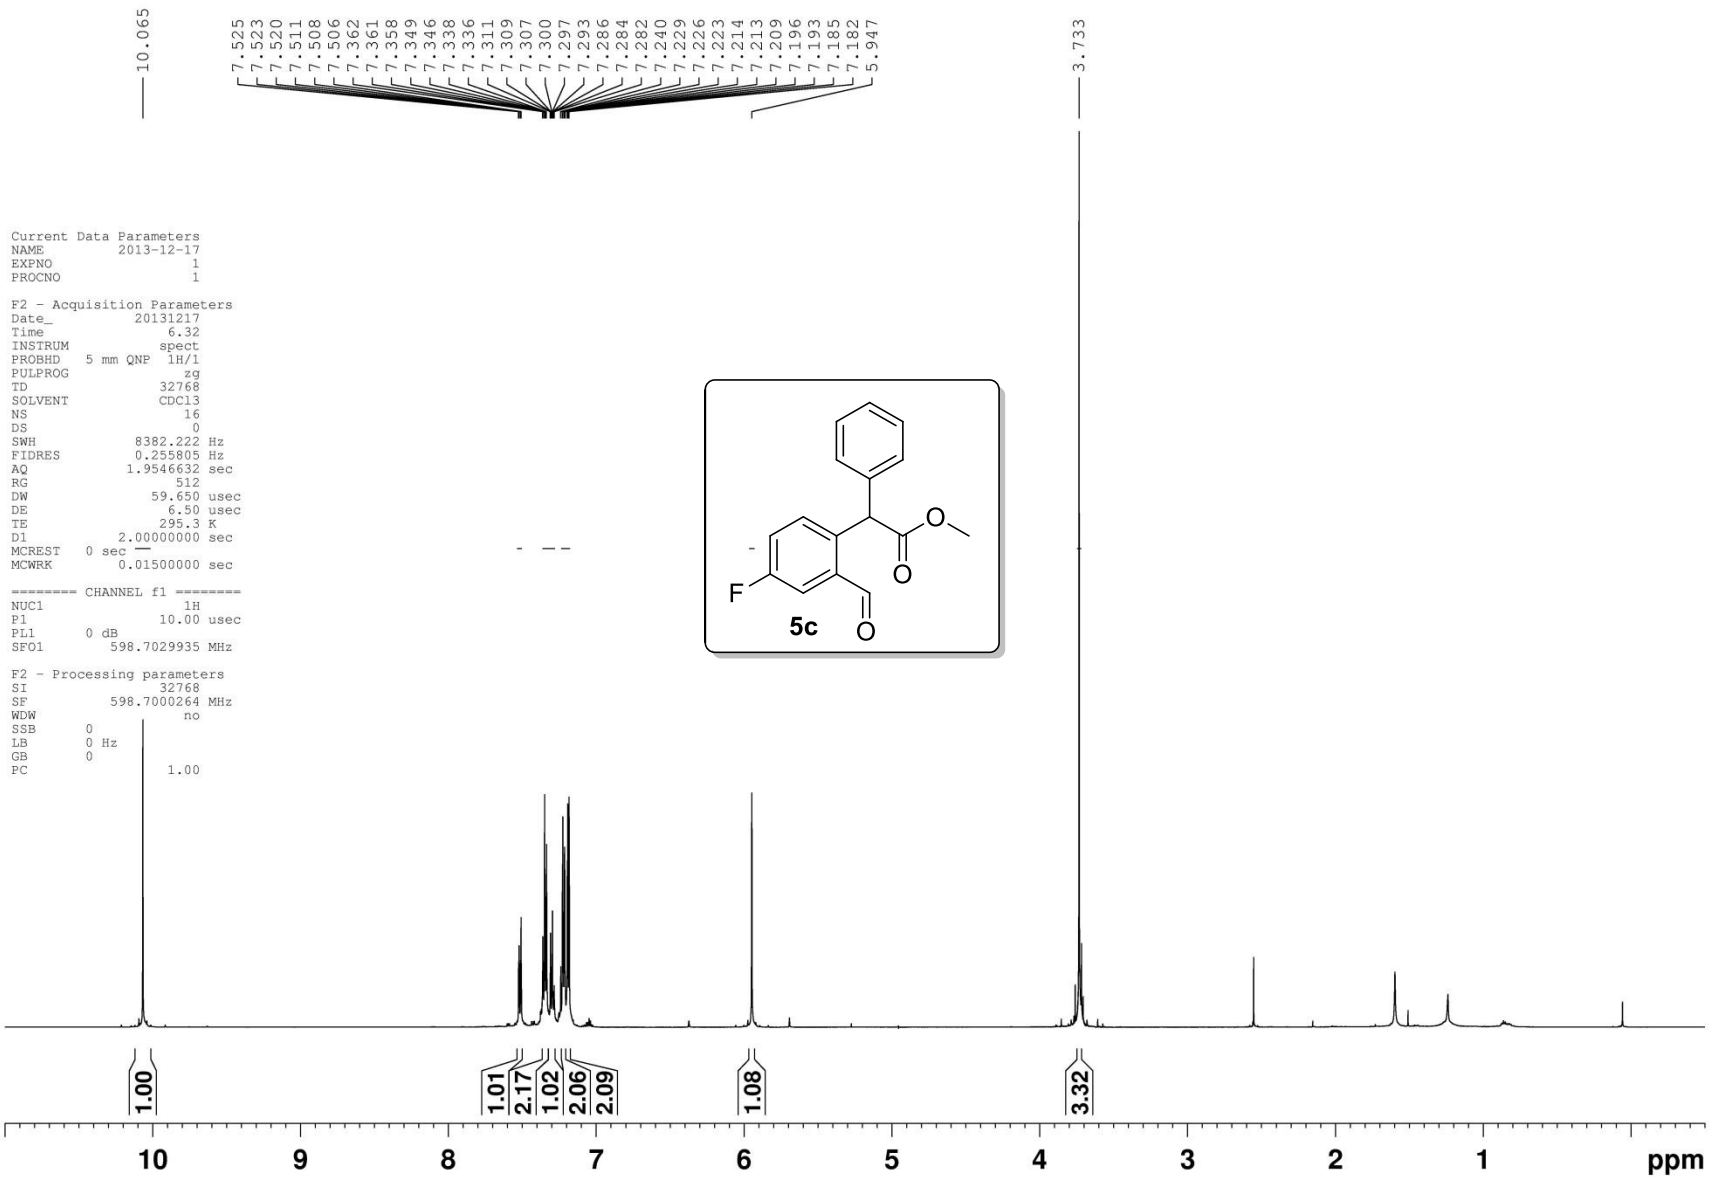

10.065  
 7.525  
 7.523  
 7.520  
 7.511  
 7.508  
 7.506  
 7.362  
 7.361  
 7.358  
 7.349  
 7.346  
 7.338  
 7.336  
 7.311  
 7.309  
 7.307  
 7.300  
 7.297  
 7.293  
 7.286  
 7.284  
 7.282  
 7.240  
 7.229  
 7.226  
 7.223  
 7.214  
 7.213  
 7.209  
 7.196  
 7.193  
 7.185  
 7.182  
 5.947  
 3.733

Current Data Parameters  
 NAME 2013-12-17  
 EXPNO 1  
 PROCNO 1

F2 - Acquisition Parameters  
 Date\_ 20131217  
 Time 6.32  
 INSTRUM spect  
 PROBHD 5 mm QNP 1H/1  
 PULPROG zg  
 TD 32768  
 SOLVENT CDC13  
 NS 16  
 DS 0  
 SWH 8382.222 Hz  
 FIDRES 0.255805 Hz  
 AQ 1.9546632 sec  
 RG 512  
 DW 59.650 usec  
 DE 6.50 usec  
 TE 295.3 K  
 D1 2.0000000 sec  
 MCREST 0 sec  
 MCWRK 0.01500000 sec

----- CHANNEL f1 -----  
 NUC1 1H  
 P1 10.00 usec  
 PL1 0 dB  
 SFO1 598.7029935 MHz

F2 - Processing parameters  
 SI 32768  
 SF 598.7000264 MHz  
 WDW no  
 SSB 0  
 LB 0 Hz  
 GB 0  
 PC 1.00

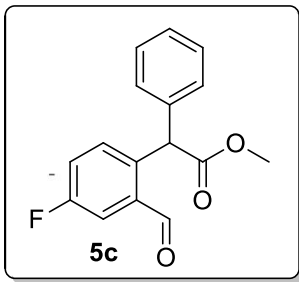

1.00  
 1.01  
 2.17  
 1.02  
 2.06  
 2.09  
 1.08  
 3.32

10 9 8 7 6 5 4 3 2 1 ppm



191.56

172.67

162.71  
161.06

137.41  
135.88  
135.86  
135.36  
135.32  
132.51  
132.46  
128.94  
128.89  
127.65  
120.68  
120.54  
120.52  
120.37

77.21  
77.00  
76.79

52.46  
52.19

Current Data Parameters  
NAME 2013-12-17  
EXPNO 2  
PROCNO 1

F2 - Acquisition Parameters  
Date\_ 20131217  
Time 6.41  
INSTRUM spect  
PROBHD 5 mm QNP 1H/1  
PULPROG zgpg  
TD 32768  
SOLVENT CDCl3  
NS 231  
DS 0  
SWH 45045.047 Hz  
FIDRES 1.374666 Hz  
AQ 0.3637748 sec  
RG 7048  
DW 11.100 usec  
DE 6.50 usec  
TE 296.8 K  
D1 3.50000000 sec  
d11 0.03000000 sec  
DELTA 3.40000010 sec  
MCREST 0 sec  
MCWRK 0.01500000 sec

==== CHANNEL f1 =====  
NUC1 13C  
P1 4.80 usec  
PL1 0 dB  
SFO1 150.5597948 MHz

==== CHANNEL f2 =====  
CPDPRG2 waltz16  
NUC2 1H  
PCPD2 92.00 usec  
PL2 120.00 dB  
PL12 9.00 dB  
PL13 14.00 dB  
SFO2 598.7029935 MHz

F2 - Processing parameters  
SI 65536  
SF 150.5432411 MHz  
WDW EM  
SSB 0  
LB 1.00 Hz  
GB 0  
PC 0.50

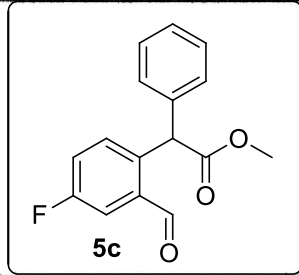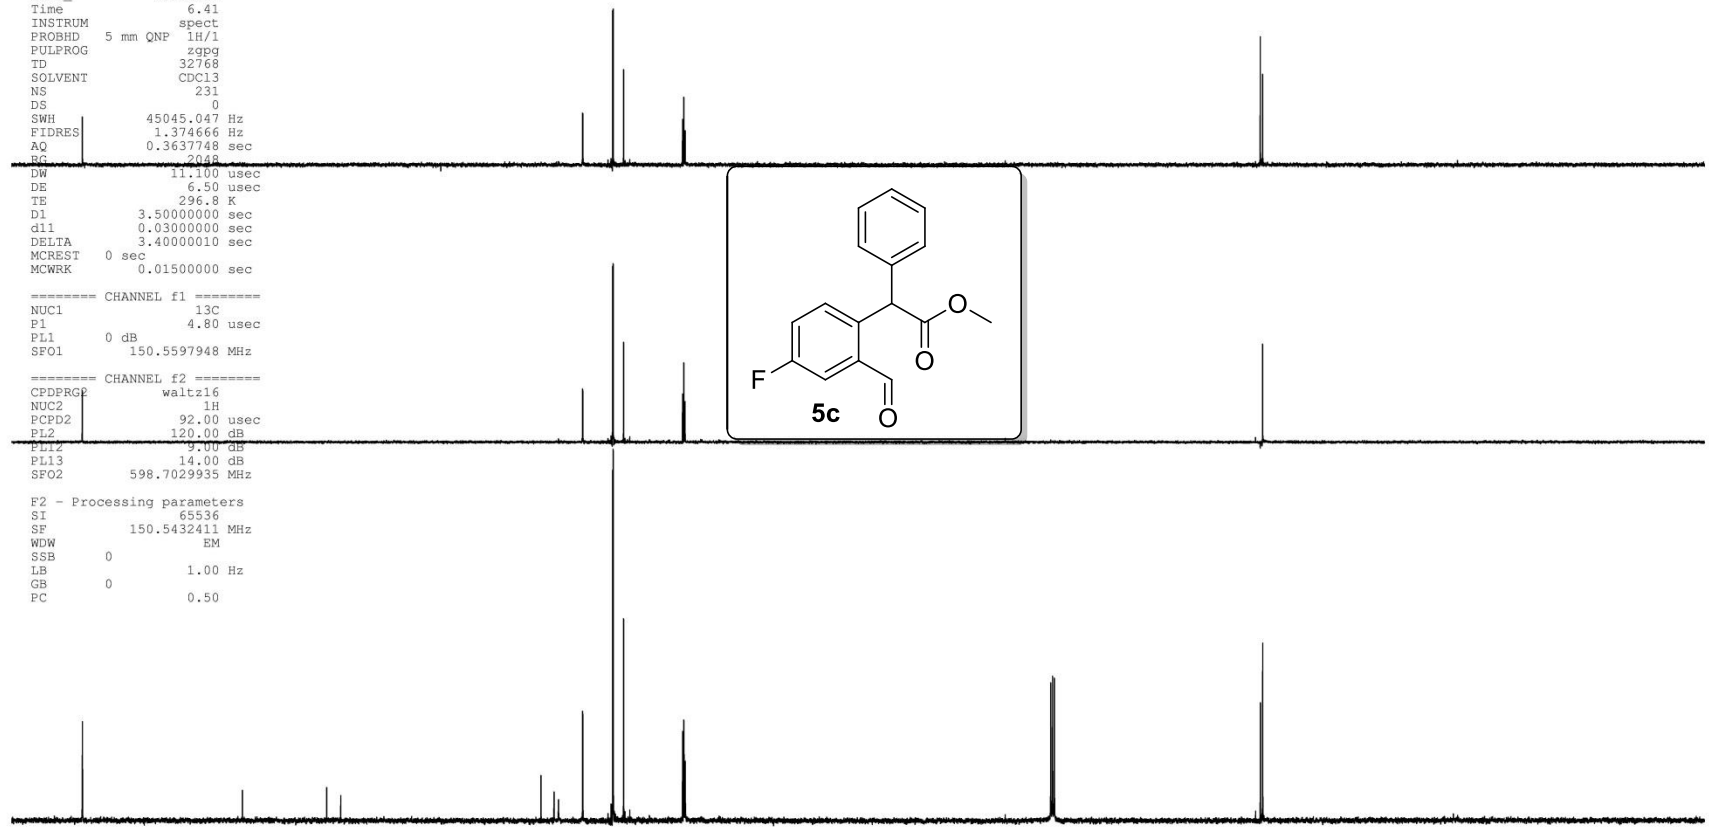

190 180 170 160 150 140 130 120 110 100 90 80 70 60 50 40 30 20 ppm

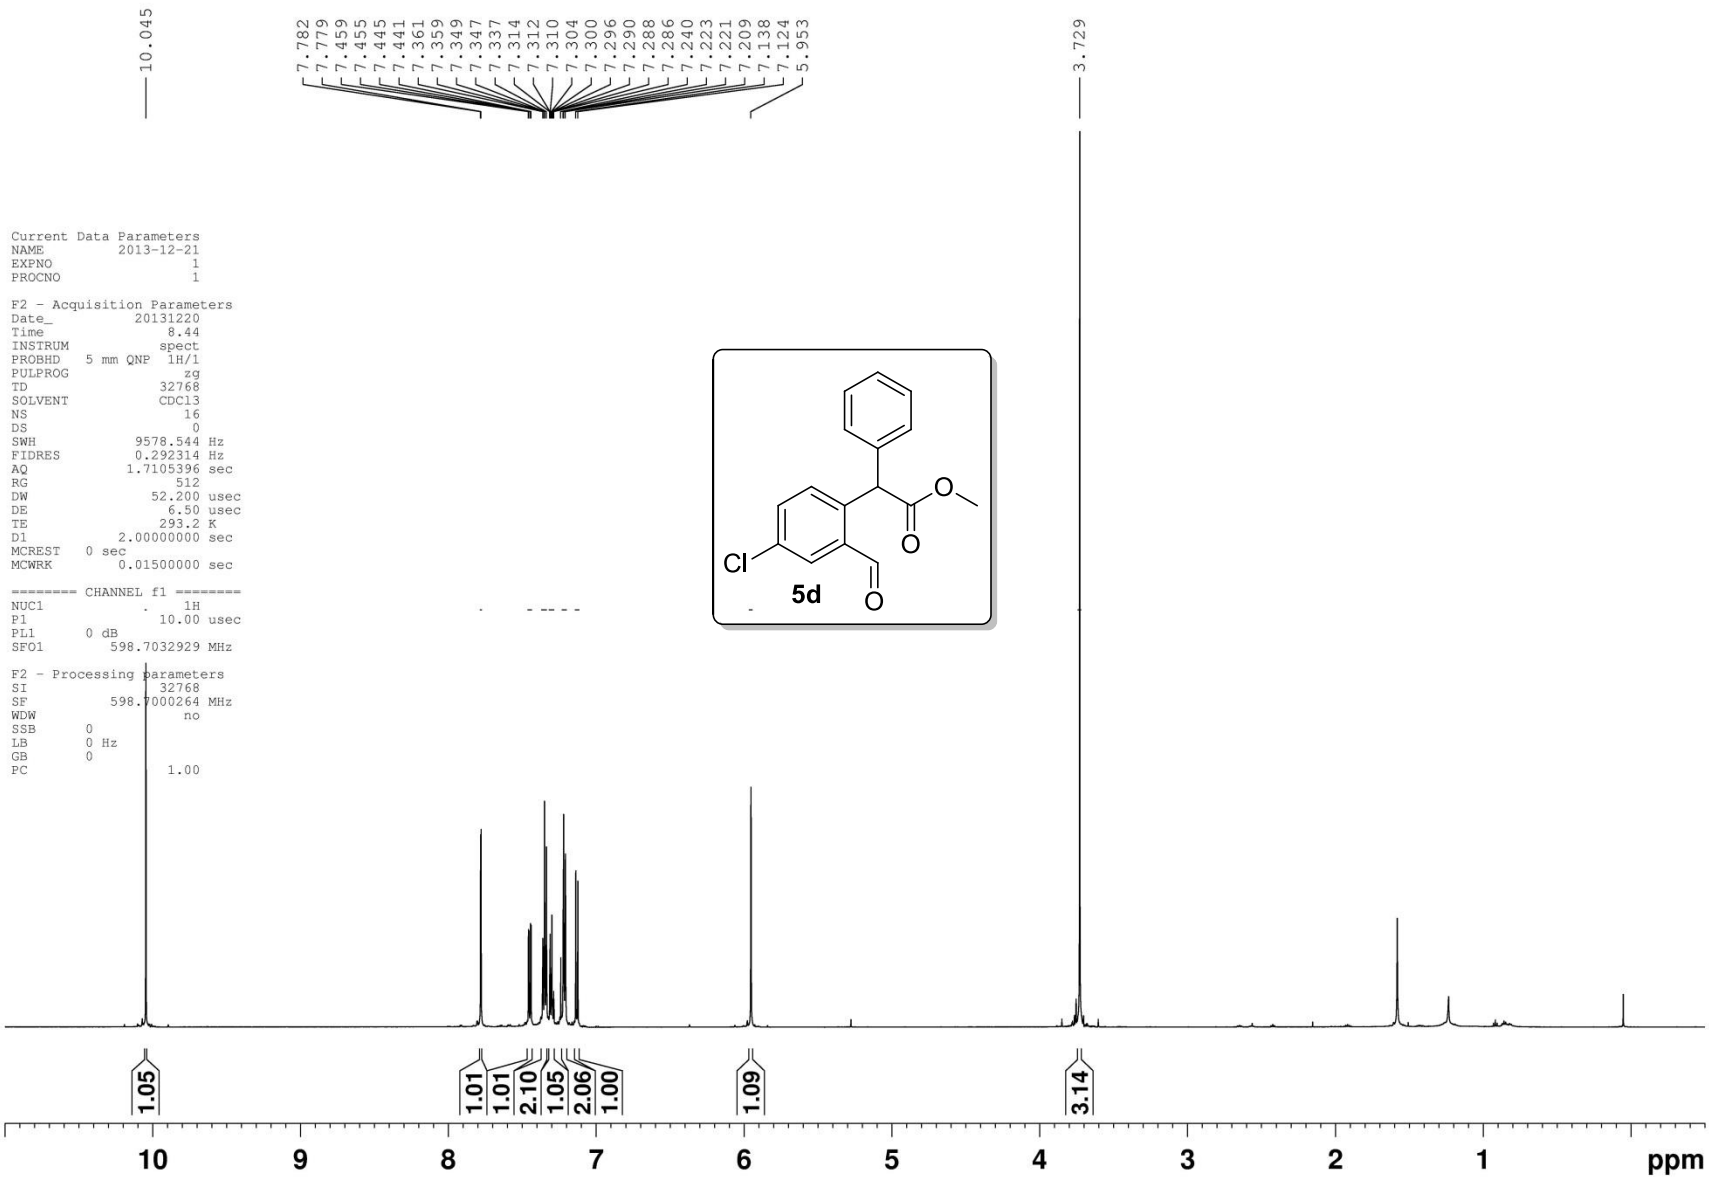

Current Data Parameters  
 NAME 2013-12-21  
 EXPNO 1  
 PROCNO 1

F2 - Acquisition Parameters  
 Date\_ 20131220  
 Time 8.44  
 INSTRUM spect  
 PROBHD 5 mm QNP 1H/1  
 PULPROG zg  
 TD 32768  
 SOLVENT CDCl3  
 NS 16  
 DS 0  
 SWH 9578.544 Hz  
 FIDRES 0.292314 Hz  
 AQ 1.7105396 sec  
 RG 512  
 DW 52.200 usec  
 DE 6.50 usec  
 TE 293.2 K  
 D1 2.0000000 sec  
 MCREST 0 sec  
 MCWRK 0.01500000 sec

----- CHANNEL f1 -----  
 NUC1 1H  
 P1 10.00 usec  
 PL1 0 dB  
 SFO1 598.7032929 MHz

F2 - Processing Parameters  
 SI 32768  
 SF 598.7000264 MHz  
 WDW no  
 SSB 0  
 LB 0 Hz  
 GB 0  
 PC 1.00

7.782  
 7.779  
 7.459  
 7.455  
 7.445  
 7.441  
 7.361  
 7.359  
 7.349  
 7.347  
 7.337  
 7.314  
 7.312  
 7.310  
 7.304  
 7.300  
 7.296  
 7.290  
 7.288  
 7.286  
 7.240  
 7.223  
 7.221  
 7.209  
 7.138  
 7.124  
 5.953

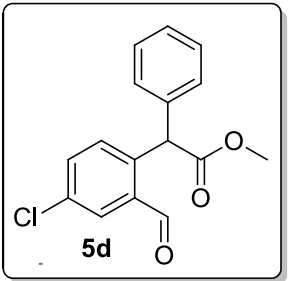

191.79

172.50

138.39  
137.13  
134.95  
134.22  
133.99  
133.61  
132.02  
128.97  
128.93  
127.71

77.21  
77.00  
76.78

52.50  
52.30

Current Data Parameters  
NAME 2013-12-21  
EXPNO 2  
PROCNO 1

F2 - Acquisition Parameters  
Date\_ 20131220  
Time 9.01  
INSTRUM spect  
PROBHD 5 mm QNP 1H/1  
PULPROG zgpg  
TD 32768  
SOLVENT CDCl3  
NS 251  
DS 0  
SWH 45045.047 Hz  
FIDRES 1.374666 Hz  
AQ 0.3637748 sec  
RG 256  
DW 11.100 usec  
DE 6.50 usec  
TE 294.6 K  
D1 3.50000000 sec  
d11 0.03000000 sec  
DELTA 3.40000010 sec  
MCREST 0 sec  
MCWRK 0.01500000 sec

==== CHANNEL f1 =====  
NUC1 13C  
P1 4.80 usec  
PL1 0 dB  
SFO1 150.5597948 MHz

==== CHANNEL f2 =====  
CPDPRG2 waltz16  
NUC2 1H  
PCPD2 92.00 usec  
PL2 120.00 dB  
PL12 9.00 dB  
PL13 14.00 dB  
SFO2 598.7029935 MHz

F2 - Processing parameters  
SI 65536  
SF 150.5432411 MHz  
WDW EM  
SSB 0  
LB 3.00 Hz  
GB 0  
PC 0.50

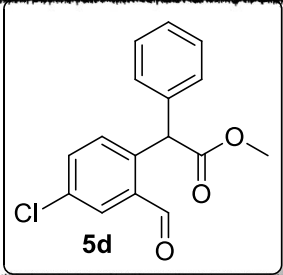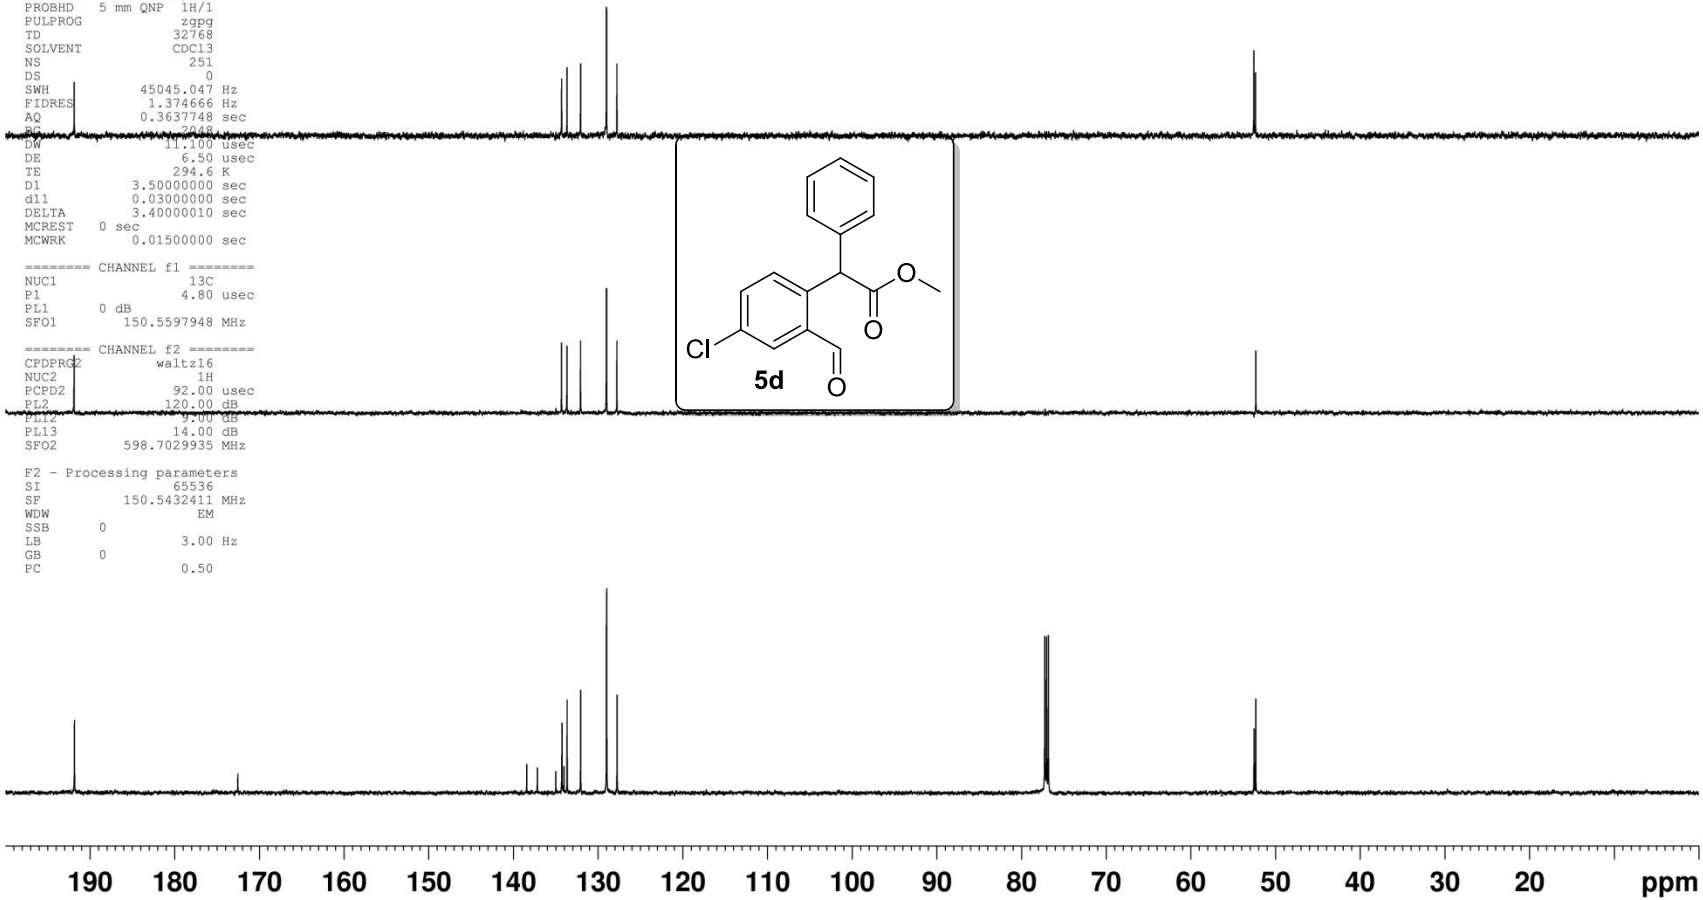

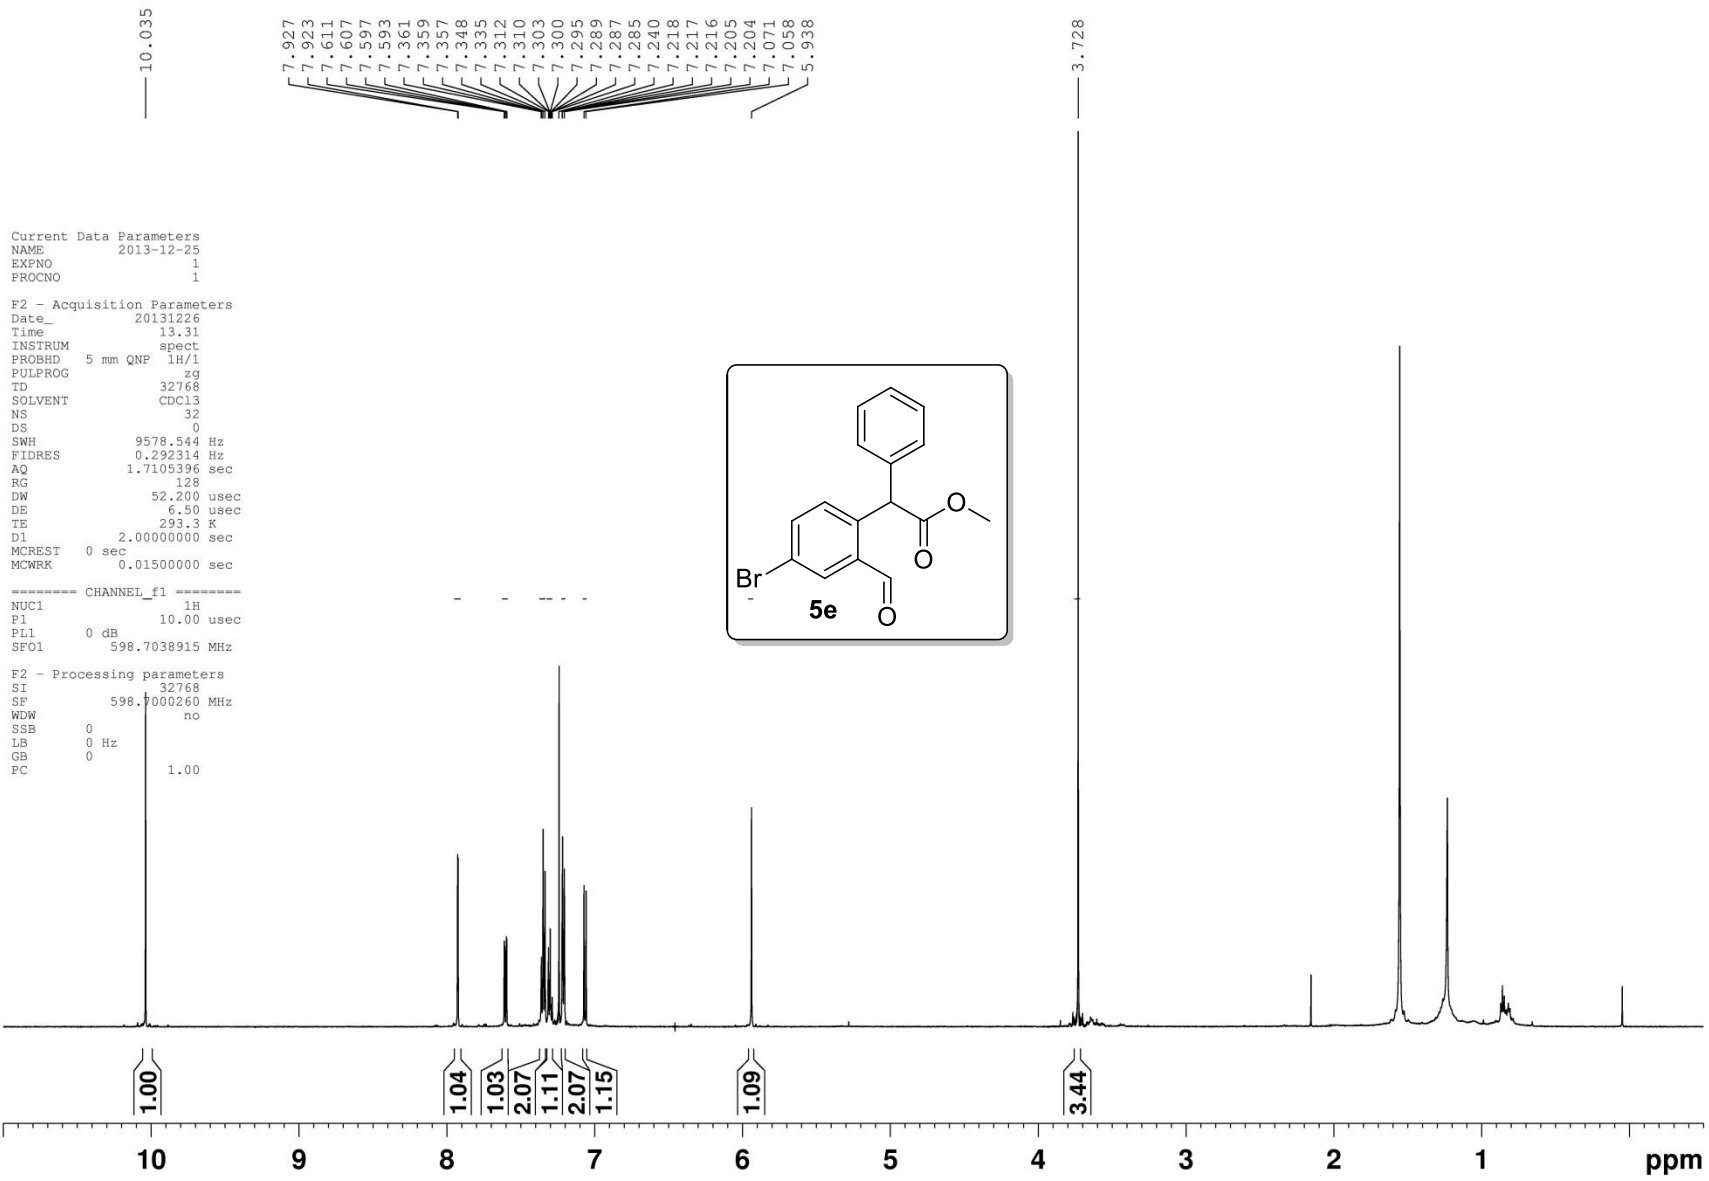

```

Current Data Parameters
NAME      2013-12-25
EXPNO    1
PROCNO   1

F2 - Acquisition Parameters
Date_    20131226
Time     13.31
INSTRUM  spect
PROBHD   5 mm QNP 1H/1
PULPROG  zg
TD        32768
SOLVENT  CDC13
NS        32
DS        0
SWH      9578.544 Hz
FIDRES   0.292314 Hz
AQ        1.7105396 sec
RG        128
DW        52.200 usec
DE        6.50 usec
TE        293.3 K
D1        2.0000000 sec
MCREST   0 sec
MCWRK    0.01500000 sec

----- CHANNEL f1 -----
NUC1     1H
P1       10.00 usec
PL1      0 dB
SFO1     598.7038915 MHz

F2 - Processing parameters
SI        32768
SF        598.7000260 MHz
WDW       no
SSB       0
LB        0 Hz
GB        0
PC        1.00
  
```

10.035  
 7.927  
 7.923  
 7.611  
 7.607  
 7.597  
 7.593  
 7.361  
 7.359  
 7.357  
 7.348  
 7.335  
 7.312  
 7.310  
 7.303  
 7.300  
 7.295  
 7.289  
 7.287  
 7.285  
 7.240  
 7.218  
 7.217  
 7.216  
 7.205  
 7.204  
 7.071  
 7.058  
 5.938  
 3.728

1.00  
 1.04  
 1.03  
 2.07  
 1.11  
 2.07  
 1.15  
 1.09  
 3.44

10 9 8 7 6 5 4 3 2 1 ppm

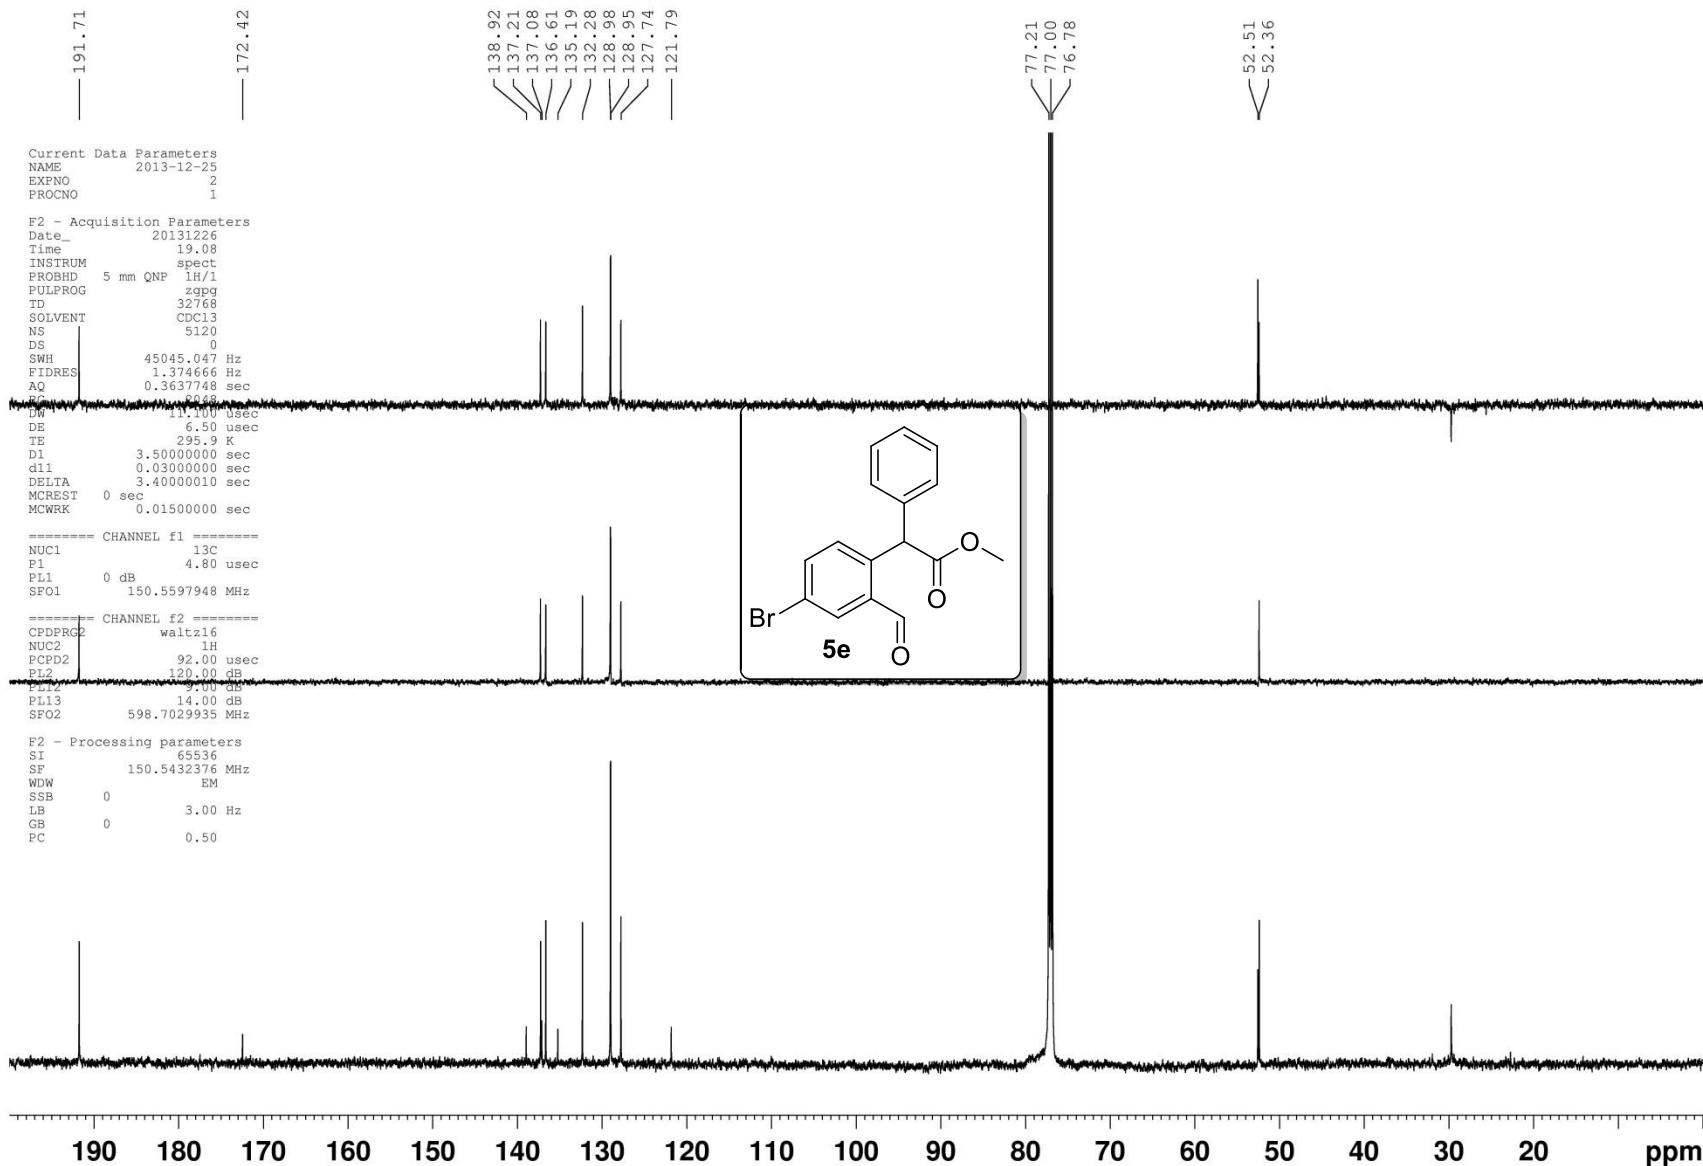

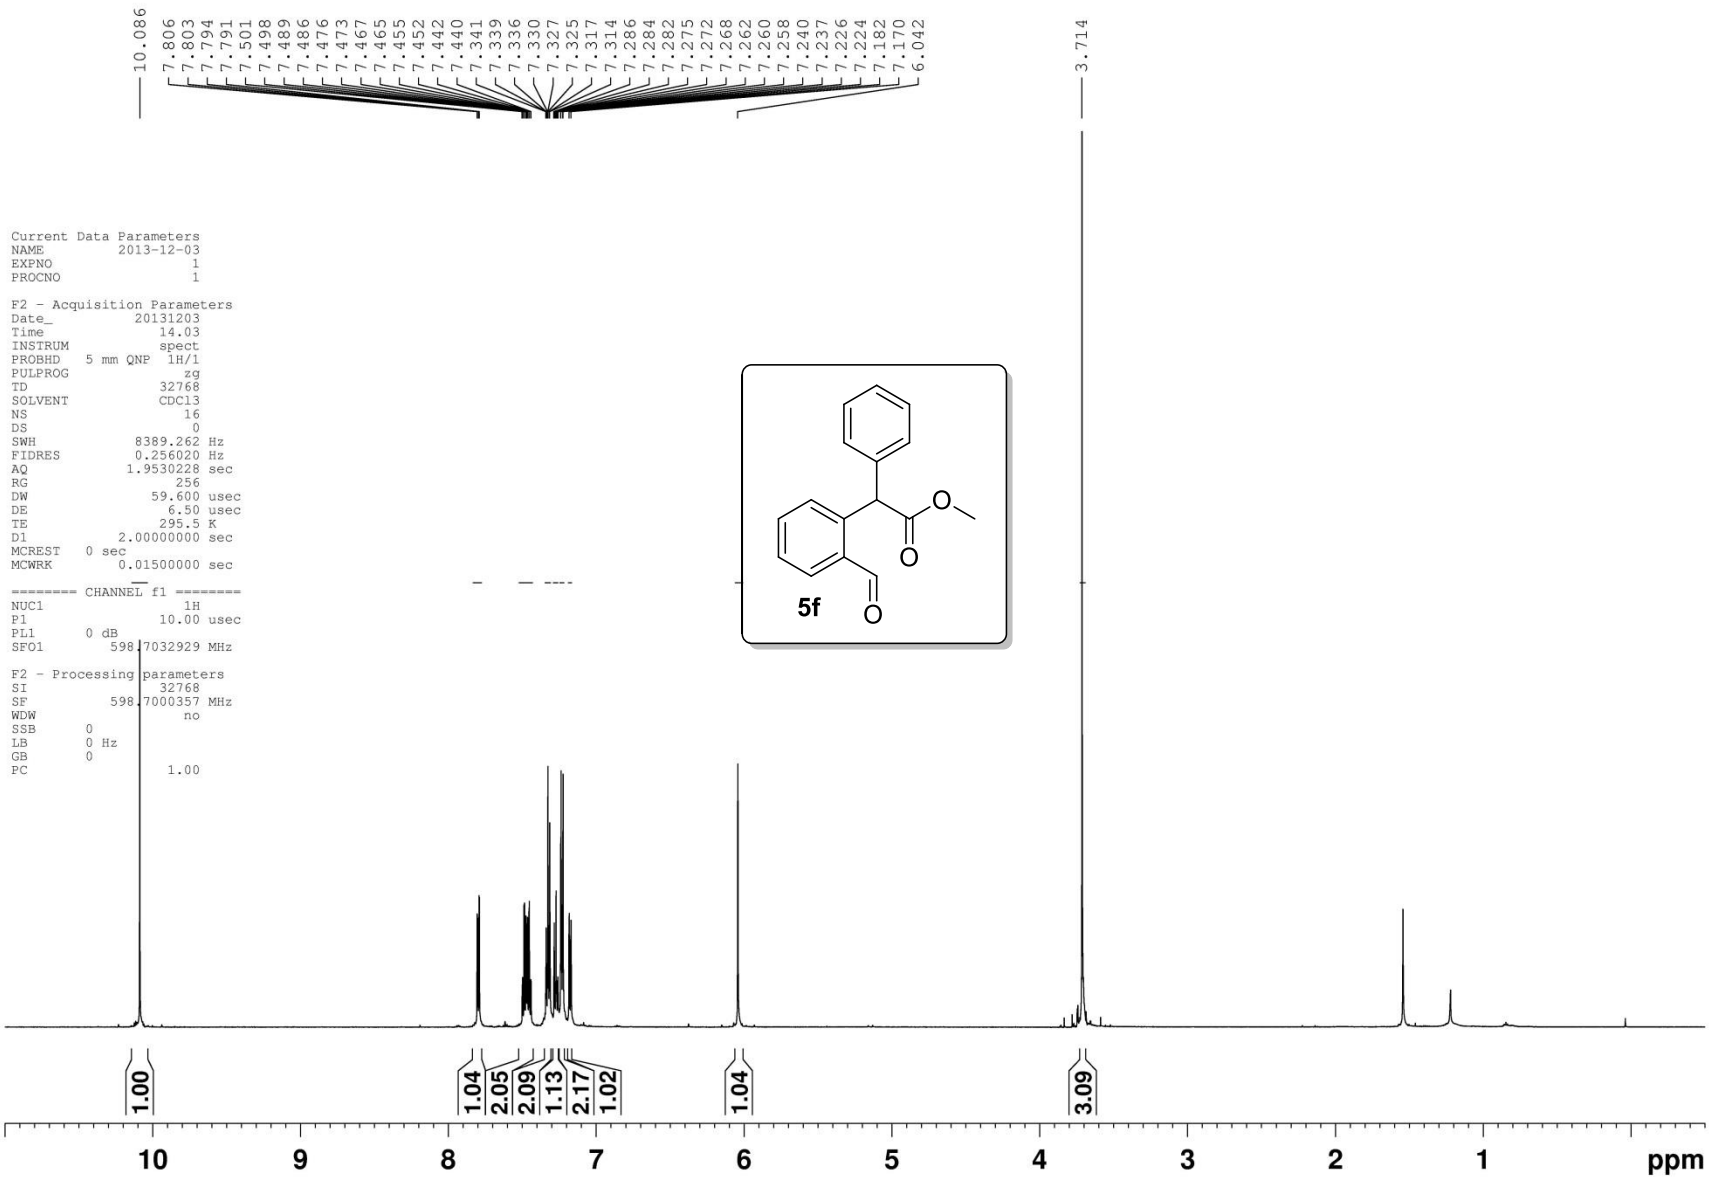

```

Current Data Parameters
NAME      2013-12-03
EXPNO    1
PROCNO    1

F2 - Acquisition Parameters
Date_     20131203
Time     14.03
INSTRUM  spect
PROBHD   5 mm QNP 1H/1
PULPROG  zg
TD        32768
SOLVENT  CDC13
NS        16
DS        0
SWH      8389.262 Hz
FIDRES   0.256020 Hz
AQ       1.9530228 sec
RG        256
DW       59.600 usec
DE       6.50 usec
TE       295.5 K
D1       2.0000000 sec
MCREST   0 sec
MCWRK    0.01500000 sec

----- CHANNEL f1 -----
NUC1      1H
P1       10.00 usec
PL1      0 dB
SFO1     598.7032929 MHz

F2 - Processing parameters
SI        32768
SF       598.7000357 MHz
WDW      no
SSB      0
LB       0 Hz
GB       0
PC       1.00
  
```

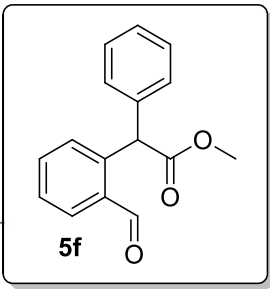

Current Data Parameters  
 NAME 2013-12-03  
 EXPNO 2  
 PROCNO 1

F2 - Acquisition Parameters  
 Date\_ 20131203  
 Time 14.06  
 INSTRUM spect  
 PROBHD 5 mm QNP 1H/1  
 PULPROG zgpg  
 TD 32768  
 SOLVENT CDCl3  
 NS 5120  
 DS 0  
 SWH 45045.047 Hz  
 FIDRES 1.374666 Hz  
 AQ 0.3637748 sec  
 RG 2048  
 DW 11.100 usec  
 DE 6.50 usec  
 TE 296.9 K  
 D1 3.50000000 sec  
 d11 0.03000000 sec  
 DELTA 3.40000010 sec  
 MCREST 0 sec  
 MCWRK 0.01500000 sec

----- CHANNEL f1 -----  
 NUC1 13C  
 P1 4.80 usec  
 PL1 0 dB  
 SFO1 150.5597948 MHz

----- CHANNEL f2 -----  
 CPDPRG2 waltz16  
 NUC2 1H  
 PCPD2 92.00 usec  
 PL2 120.00 dB  
 PL12 9.00 dB  
 PL13 14.00 dB  
 SFO2 598.7029935 MHz

F2 - Processing parameters  
 SI 65536  
 SF 150.5432383 MHz  
 WDW EM  
 SSB 0  
 LB 3.00 Hz  
 GB 0  
 PC 0.50

140.00  
 137.61  
 135.12  
 133.77  
 133.70  
 130.37  
 129.10  
 128.80  
 127.71  
 127.48

77.21  
 77.00  
 76.78

52.72  
 52.35

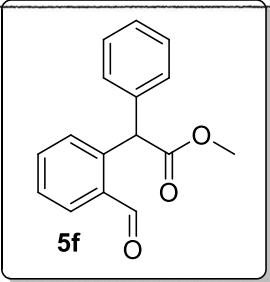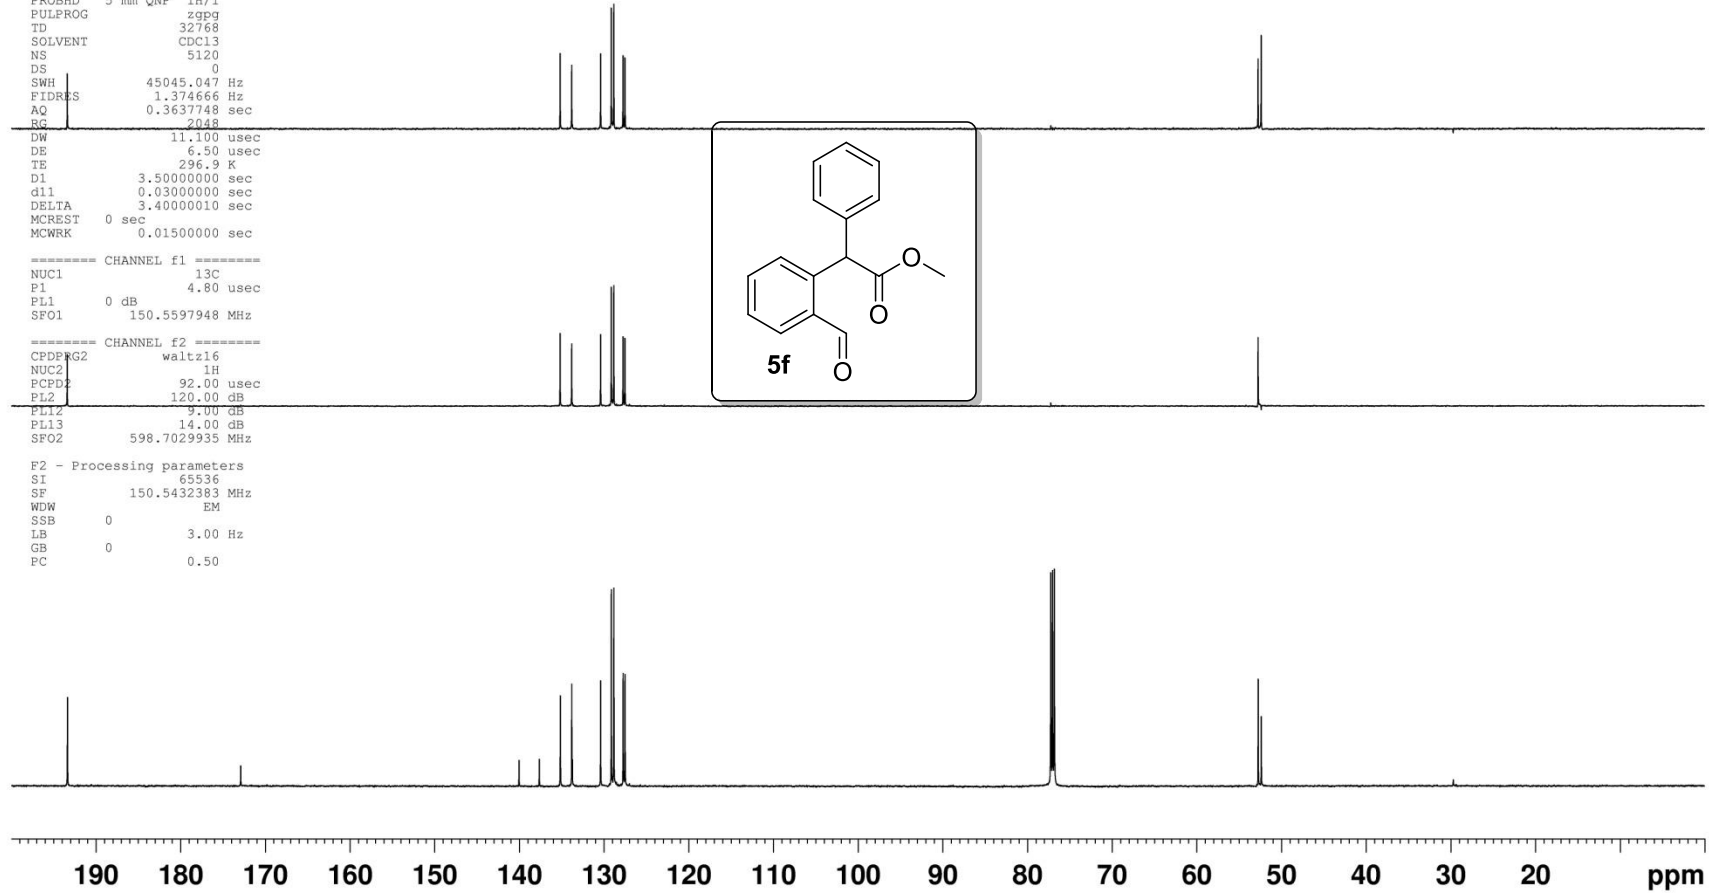

190 180 170 160 150 140 130 120 110 100 90 80 70 60 50 40 30 20 ppm

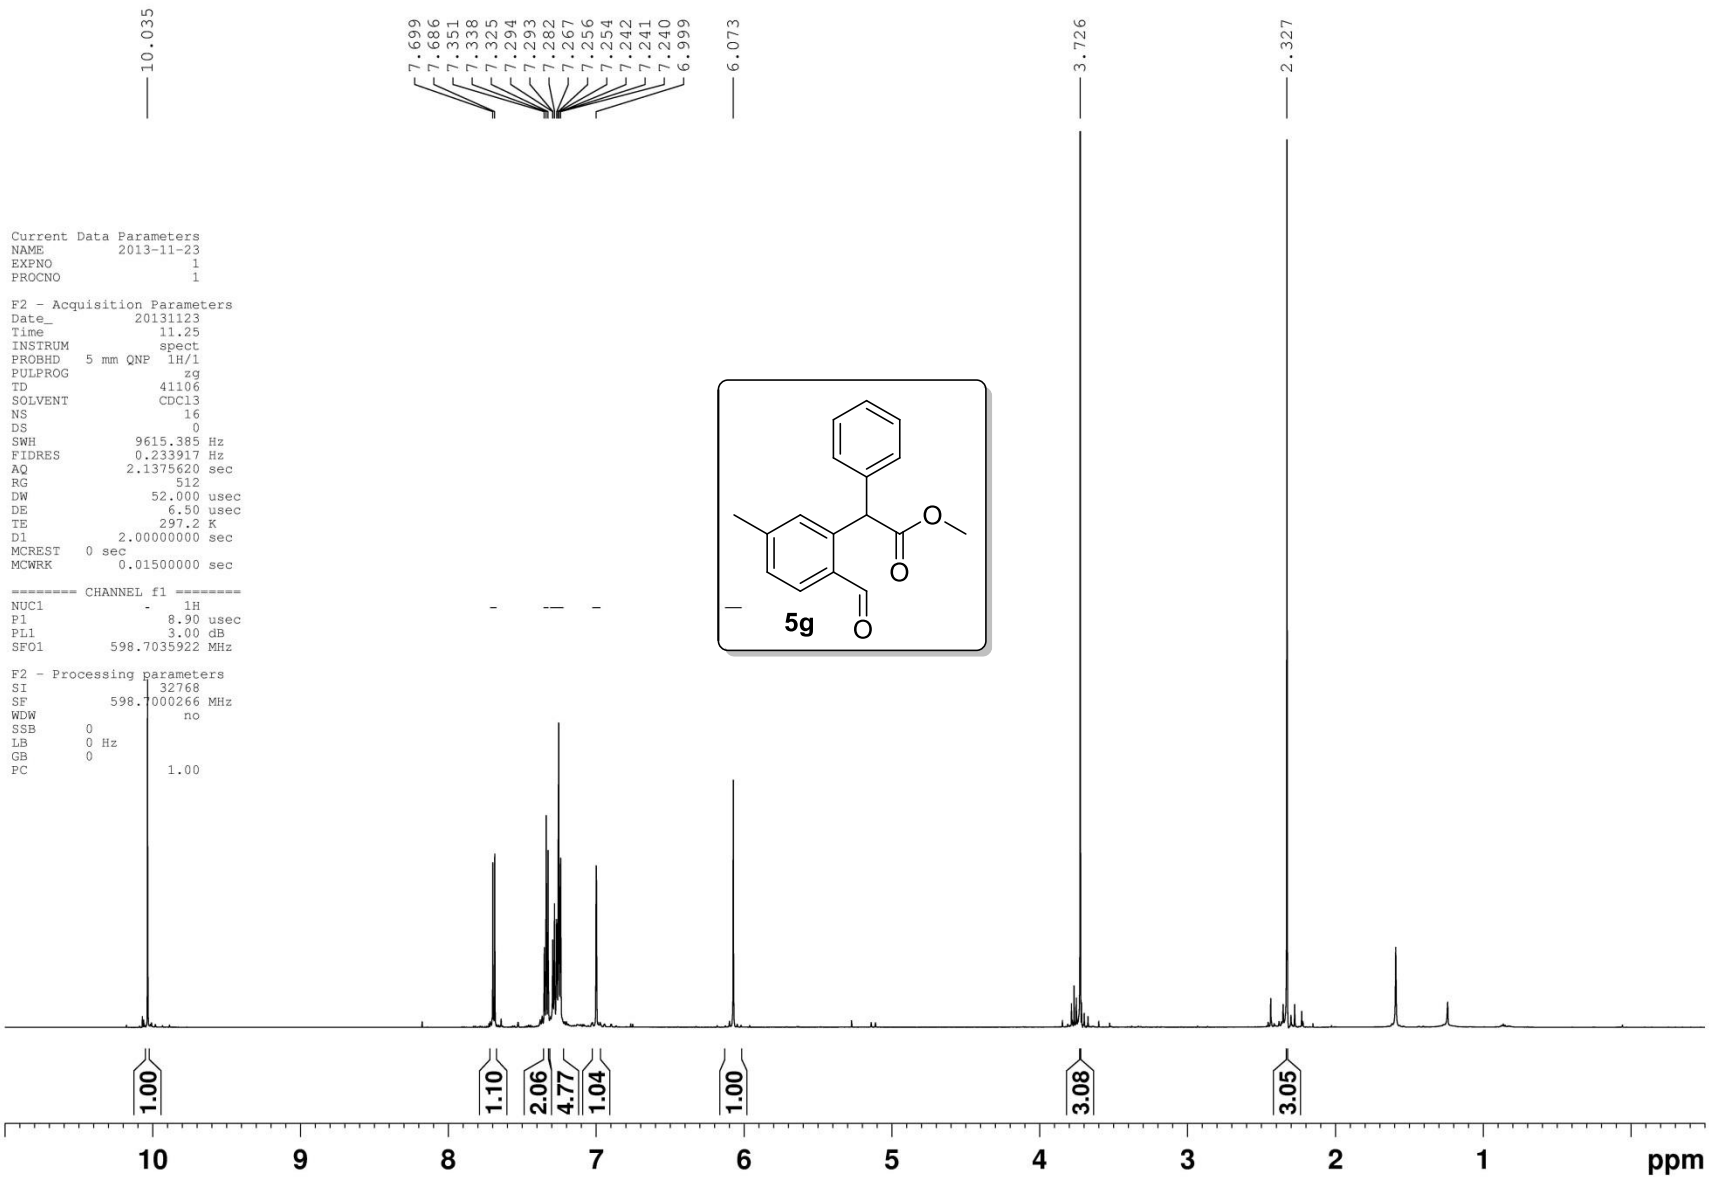

```

Current Data Parameters
NAME      2013-11-23
EXPNO    1
PROCNO    1

F2 - Acquisition Parameters
Date_     20131123
Time      11.25
INSTRUM   spect
PROBHD    5 mm QNP 1H/1
PULPROG   zg
TD         41106
SOLVENT   CDC13
NS         16
DS         0
SWH        9615.385 Hz
FIDRES     0.233917 Hz
AQ         2.1375620 sec
RG         512
DW         52.000 usec
DE         6.50 usec
TE         297.2 K
D1         2.0000000 sec
MCREST    0 sec
MCWRK     0.01500000 sec

----- CHANNEL f1 -----
NUC1      1H
P1        8.90 usec
PL1       3.00 dB
SFO1      598.7035922 Mhz

F2 - Processing parameters
SI        32768
SF        598.7000266 Mhz
WDW       no
SSB       0
LB        0 Hz
GB        0
PC        1.00

```



Current Data Parameters  
 NAME 2013-11-23  
 EXPNO 2  
 PROCNO 1

F2 - Acquisition Parameters  
 Date\_ 20131123  
 Time 11.26  
 INSTRUM spect  
 PROBHD 5 mm QNP 1H/1  
 PULPROG zgpg  
 TD 32768  
 SOLVENT CDCl3  
 NS 200  
 DS 0  
 SWH 45045.047 Hz  
 FIDRES 1.374666 Hz  
 AQ 0.3637748 sec  
 RG 5048  
 DW 11.100 usec  
 DE 6.50 usec  
 TE 297.2 K  
 D1 3.50000000 sec  
 d11 0.03000000 sec  
 DELTA 3.40000010 sec  
 MCREST 0 sec  
 MCWRK 0.01500000 sec

==== CHANNEL f1 =====  
 NUC1 13C  
 P1 4.80 usec  
 PL1 0 dB  
 SFO1 150.5597948 MHz

==== CHANNEL f2 =====  
 CPDPRG2 waltz16  
 NUC2 1H  
 PCPDZ 92.00 usec  
 PL2 120.00 dB  
 PLT2 9.00 dB  
 PL13 14.00 dB  
 SFO2 598.7029935 MHz

F2 - Processing parameters  
 SI 65536  
 SF 150.5432421 MHz  
 WDW EM  
 SSB 0  
 LB 3.00 Hz  
 GB 0  
 PC 0.50

192.91

172.99

144.93  
 139.88  
 137.64  
 135.54  
 131.39  
 131.09  
 129.09  
 128.74  
 128.38  
 127.41

77.21  
 77.00  
 76.79

52.53  
 52.32

21.97

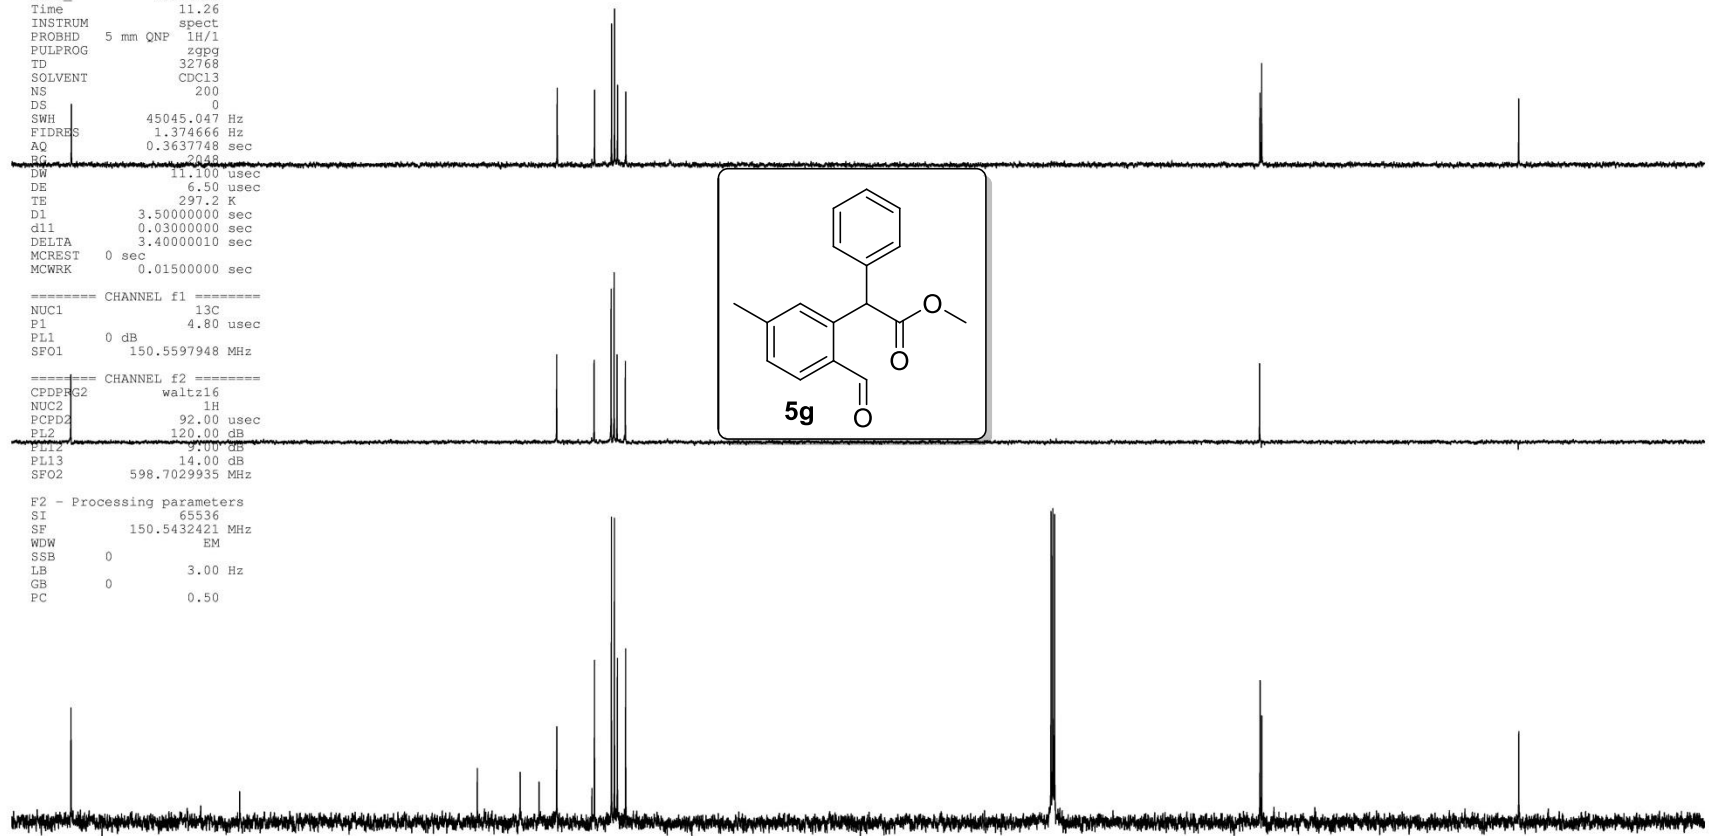

190 180 170 160 150 140 130 120 110 100 90 80 70 60 50 40 30 20 ppm

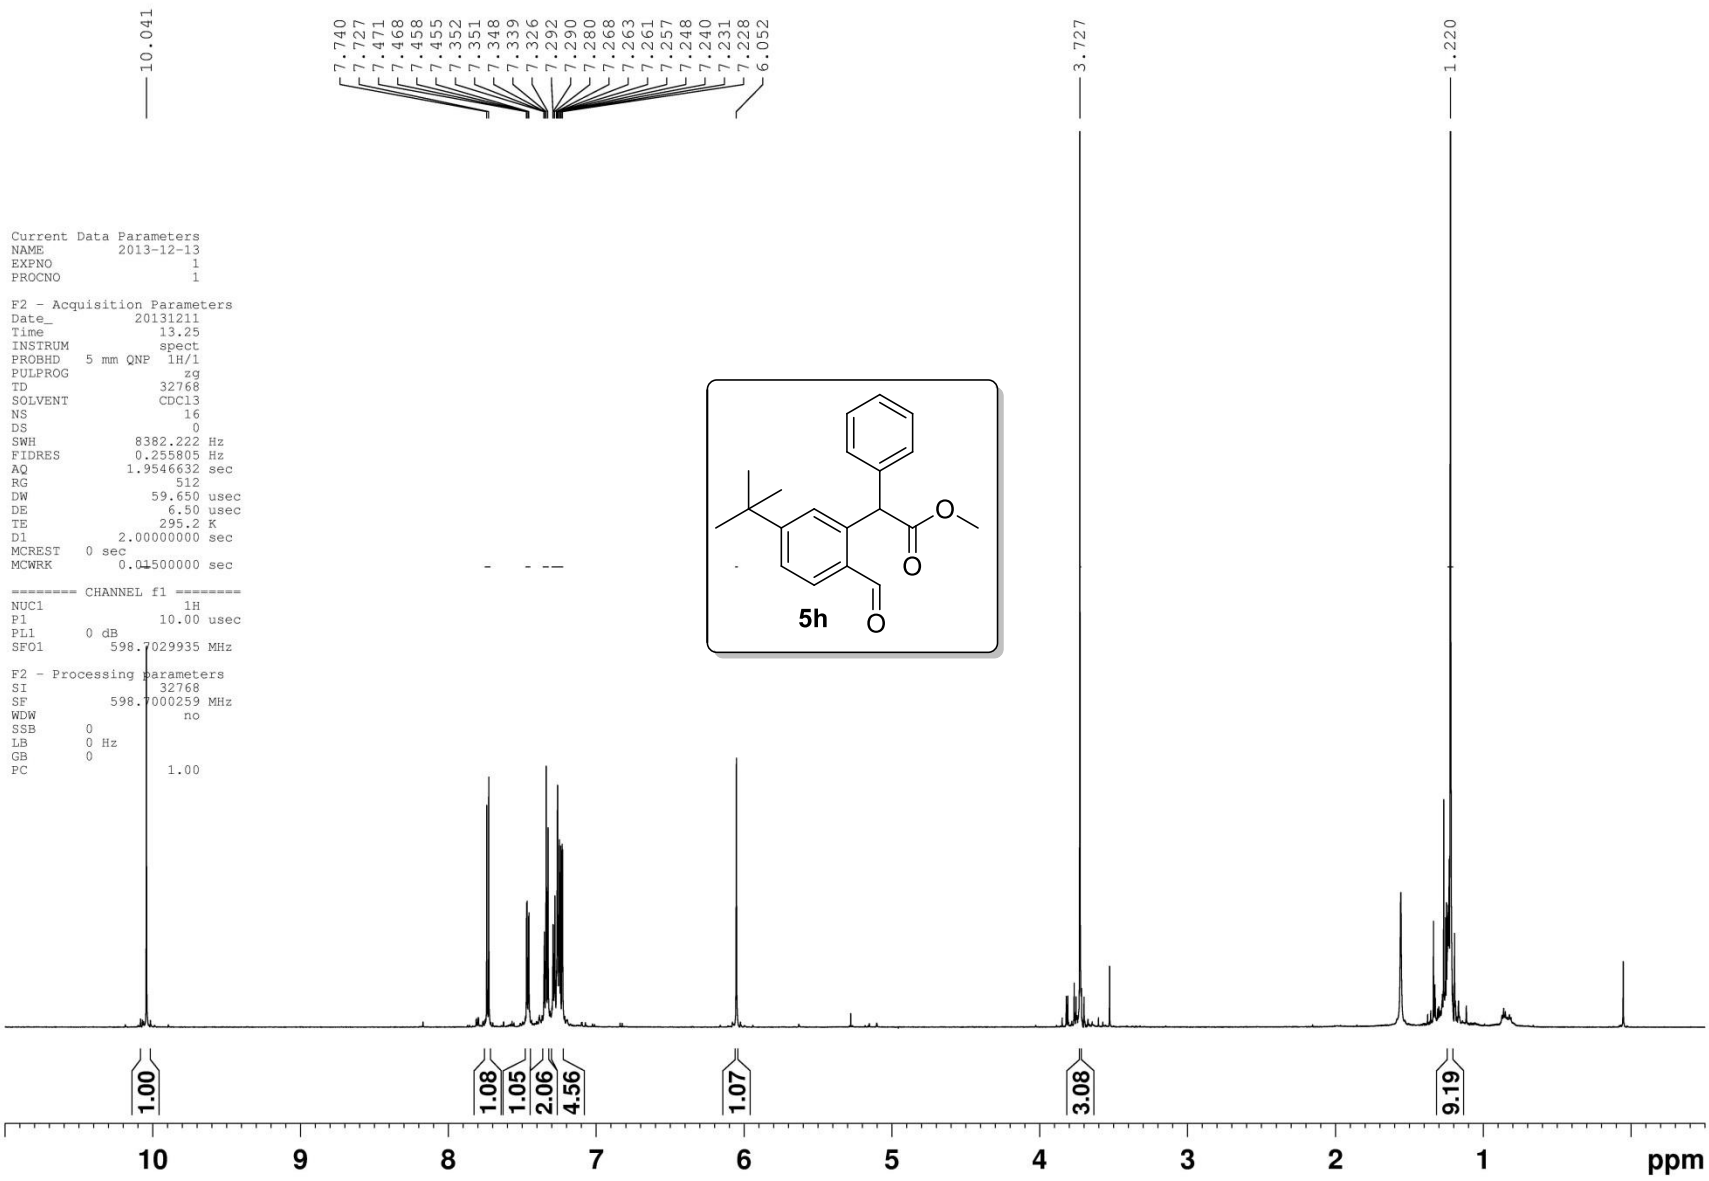

Current Data Parameters  
 NAME 2013-12-13  
 EXPNO 1  
 PROCNO 1

F2 - Acquisition Parameters  
 Date\_ 20131211  
 Time 13.25  
 INSTRUM spect  
 PROBHD 5 mm QNP 1H/1  
 PULPROG zg  
 TD 32768  
 SOLVENT CDC13  
 NS 16  
 DS 0  
 SWH 8382.222 Hz  
 FIDRES 0.255805 Hz  
 AQ 1.9546632 sec  
 RG 512  
 DW 59.650 usec  
 DE 6.50 usec  
 TE 295.2 K  
 D1 2.0000000 sec  
 MCREST 0 sec  
 MCWRK 0.01500000 sec

----- CHANNEL f1 -----  
 NUC1 1H  
 P1 10.00 usec  
 PL1 0 dB  
 SFO1 598.7029935 MHz

F2 - Processing Parameters  
 SI 32768  
 SF 598.7000259 MHz  
 WDW no  
 SSB no  
 LB 0 Hz  
 GB 0  
 PC 1.00

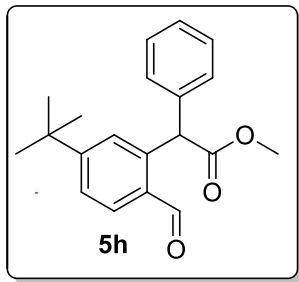

— 192.92

— 173.04

— 157.58

139.59  
137.75  
135.28  
131.34  
129.08  
128.69  
127.78  
127.42  
124.51

77.21  
77.00  
76.78

52.88  
52.29

35.30  
30.85

Current Data Parameters  
NAME 2013-12-13  
EXPNO 2  
PROCNO 1

F2 - Acquisition Parameters  
Date\_ 20131211  
Time 13.41  
INSTRUM spect  
PROBHD 5 mm QNP 1H/1  
PULPROG zgpg  
TD 32768  
SOLVENT CDCl3  
NS 5120  
DS 0  
SWH 45045.047 Hz  
FIDRES 1.374666 Hz  
AQ 0.3637748 sec  
RG 2048  
DW 11.100 usec  
DE 6.50 usec  
TE 296.8 K  
D1 3.50000000 sec  
d11 0.03000000 sec  
DELTA 3.40000010 sec  
MCREST 0 sec  
MCWRK 0.01500000 sec

----- CHANNEL f1 -----  
NUC1 13C  
P1 4.80 usec  
PL1 0 dB  
SFO1 150.5597948 MHz

----- CHANNEL f2 -----  
CPDPRG2 waltz16  
NUC2 1H  
PCPDZ 92.00 usec  
PL2 120.00 dB  
PL12 9.00 dB  
PL13 14.00 dB  
SFO2 598.7029935 MHz

F2 - Processing parameters  
SI 65536  
SF 150.5432383 MHz  
WDW EM  
SSB 0  
LB 3.00 Hz  
GB 0  
PC 0.50

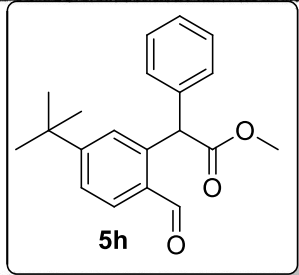

5h

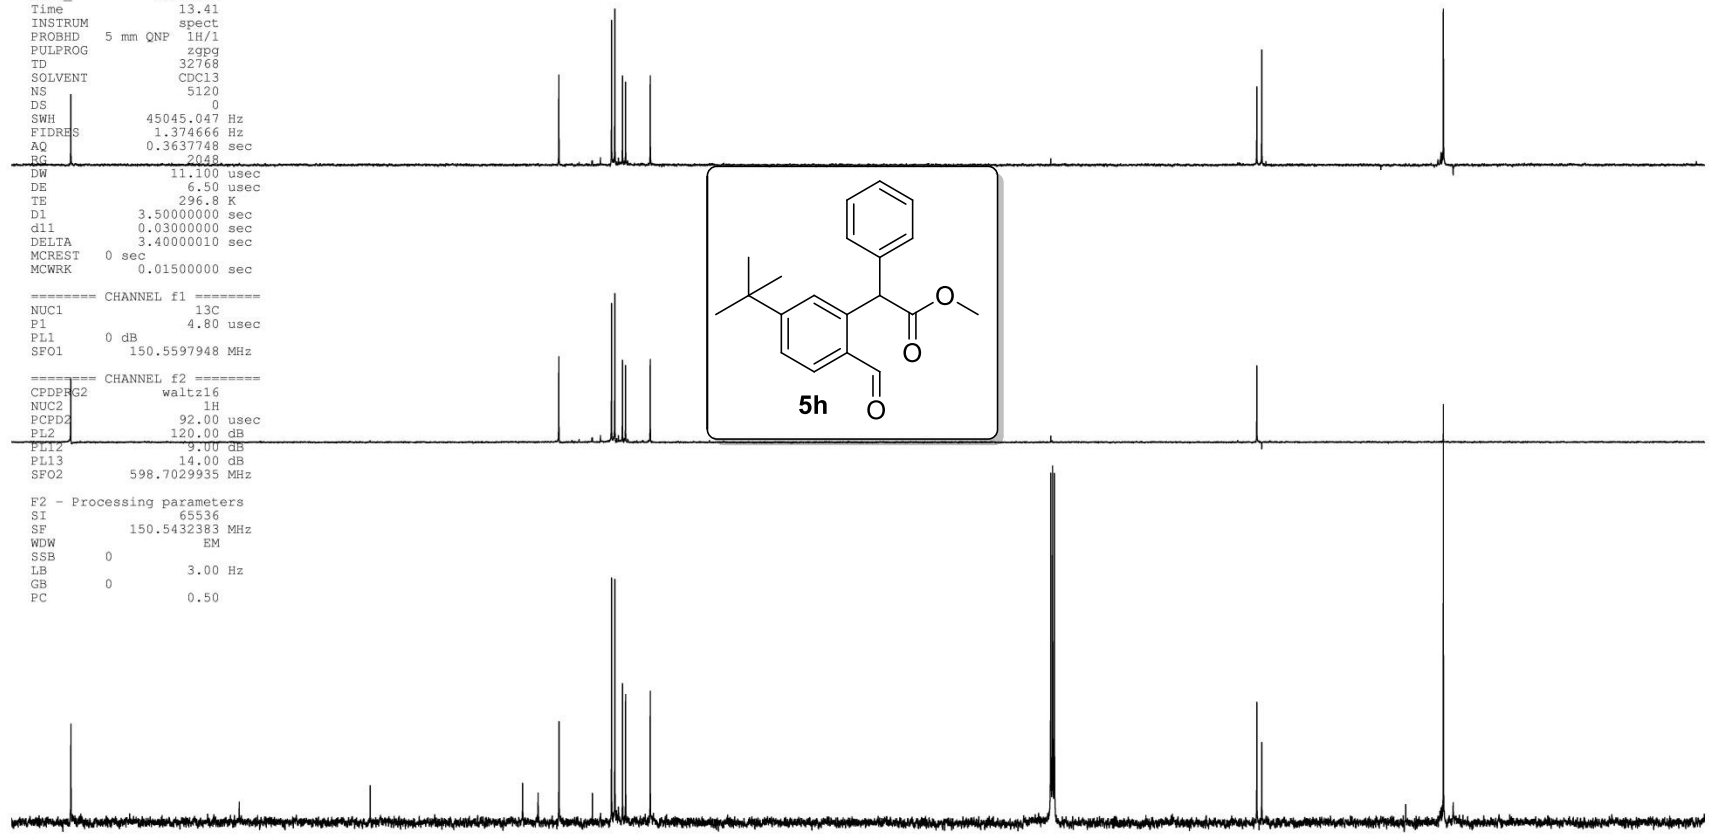

190 180 170 160 150 140 130 120 110 100 90 80 70 60 50 40 30 20 ppm

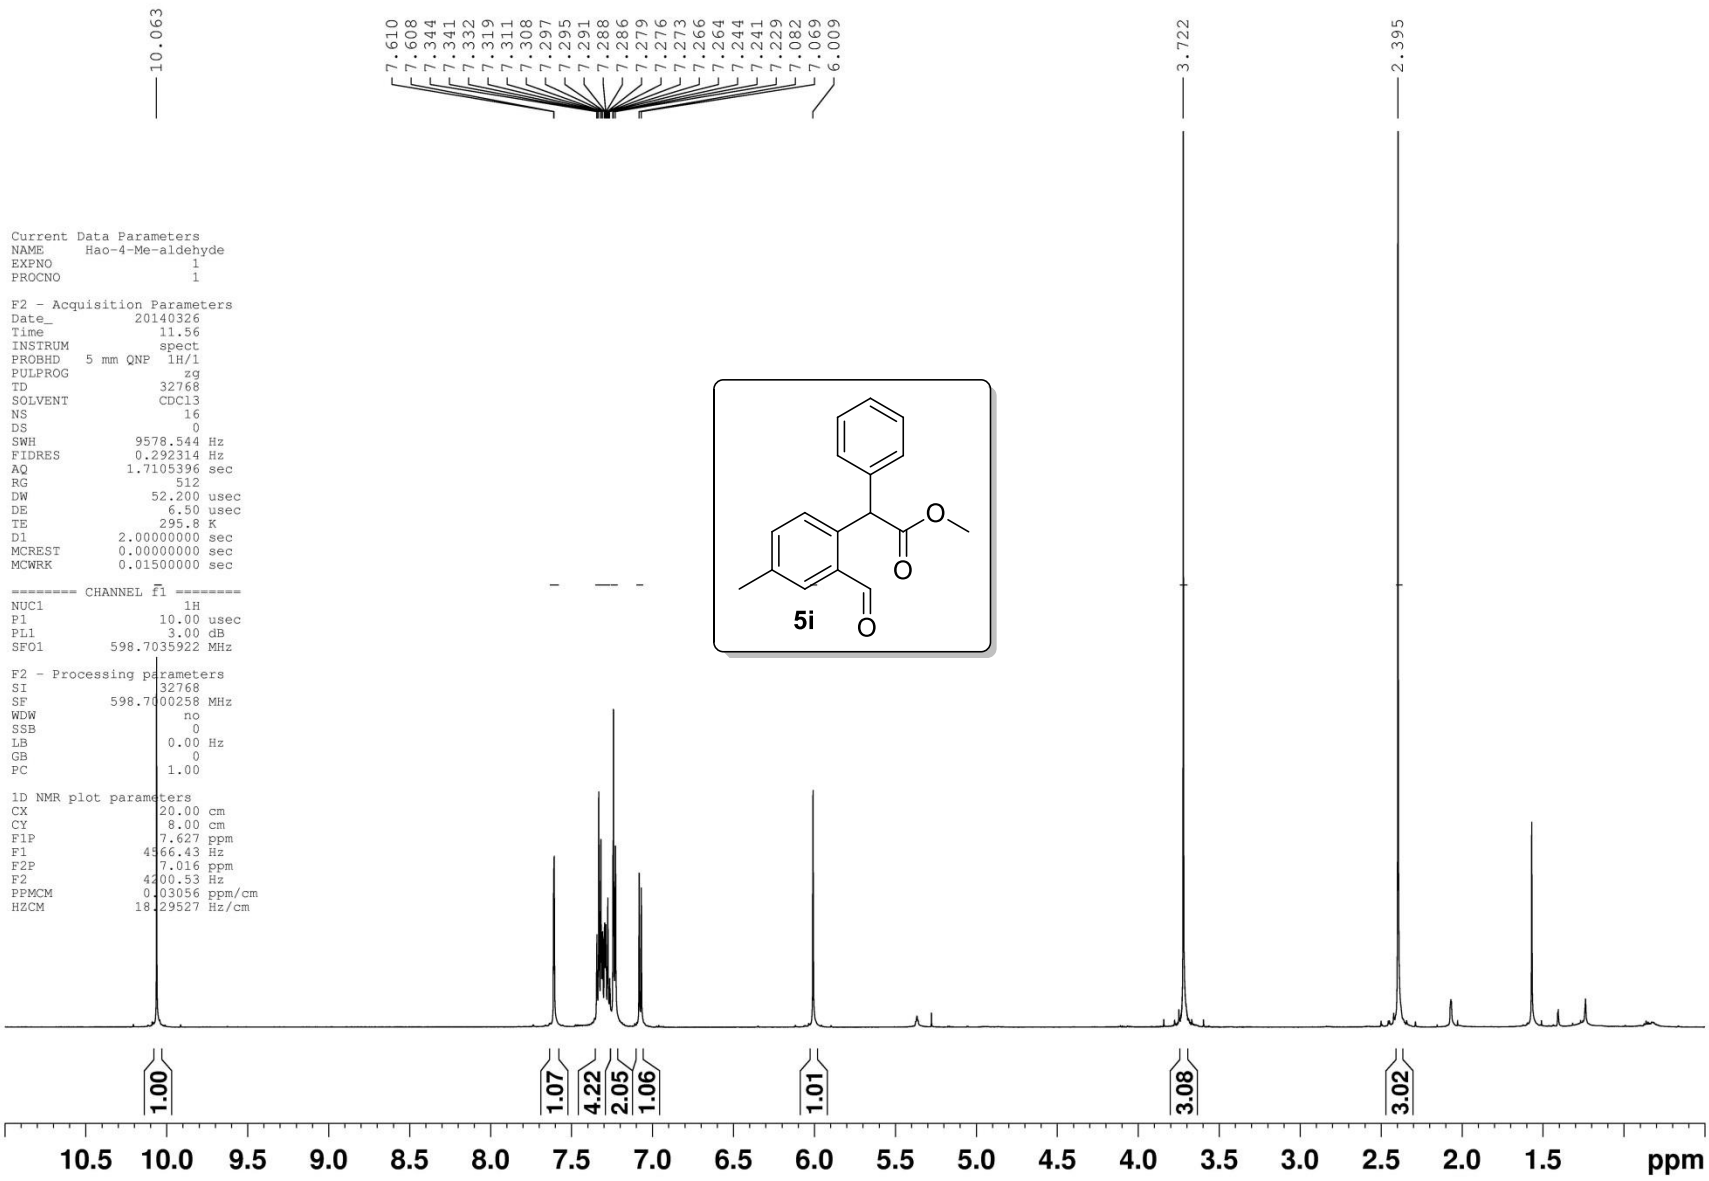

Current Data Parameters  
 NAME Hao-4-Me-aldehyde  
 EXPNO 1  
 PROCNO 1

F2 - Acquisition Parameters  
 Date\_ 20140326  
 Time 11.56  
 INSTRUM spect  
 PROBHD 5 mm QNP 1H/1  
 PULPROG zg  
 TD 32768  
 SOLVENT CDC13  
 NS 16  
 DS 0  
 SWH 9578.544 Hz  
 FIDRES 0.292314 Hz  
 AQ 1.7105396 sec  
 RG 512  
 DW 52.200 usec  
 DE 6.50 usec  
 TE 295.8 K  
 D1 2.0000000 sec  
 MCREST 0.0000000 sec  
 MCWRK 0.0150000 sec

----- CHANNEL f1 -----  
 NUC1 1H  
 P1 10.00 usec  
 PL1 3.00 dB  
 SFO1 598.7035922 Mhz

F2 - Processing parameters  
 SI 32768  
 SF 598.7000258 Mhz  
 WDW no  
 SSB 0  
 LB 0.00 Hz  
 GB 0  
 PC 1.00

1D NMR plot parameters  
 CX 20.00 cm  
 CY 8.00 cm  
 FLP 7.627 ppm  
 F1 4566.43 Hz  
 F2P 7.016 ppm  
 F2 4400.53 Hz  
 PPMCM 0.03056 ppm/cm  
 HZCM 1829527 Hz/cm

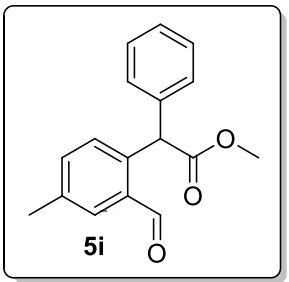

Current Data Parameters  
 NAME 2014-04-01  
 EXPNO 2  
 PROCNO 1

F2 - Acquisition Parameters  
 Date\_ 20140327  
 Time 4.29  
 INSTRUM spect  
 PROBHD 5 mm QNP 1H/1  
 PULPROG zgpg  
 TD 32768  
 SOLVENT CDCl3  
 NS 500  
 DS 0  
 SWH 45045.047 Hz  
 FIDRES 1.374666 Hz  
 AQ 0.3637748 sec  
 RG 2048  
 DW 11.100 usec  
 DE 6.50 usec  
 TE 297.3 K  
 D1 3.50000000 sec  
 d11 0.03000000 sec  
 DELTA 3.40000010 sec  
 MCREST 0 sec  
 MCWRK 0.01500000 sec

==== CHANNEL f1 =====  
 NUC1 13C  
 P1 4.80 usec  
 PL1 0 dB  
 SFO1 150.5597948 MHz

==== CHANNEL f2 =====  
 CPDPRG2 waltz16  
 NUC2 1H  
 PCPD2 92.00 usec  
 PL2 120.00 dB  
 PL12 9.00 dB  
 PL13 14.00 dB  
 SFO2 598.7029935 MHz

F2 - Processing parameters  
 SI 65536  
 SF 150.5432390 MHz  
 WDW EM  
 SSB 0  
 LB 3.00 Hz  
 GB 0  
 PC 1.00

193.46

173.04

137.83  
 137.64  
 137.10  
 135.71  
 134.49  
 133.52  
 130.33  
 129.04  
 128.75  
 127.39

77.21  
 77.00  
 76.79

52.38  
 52.32

20.73

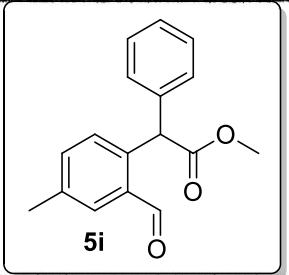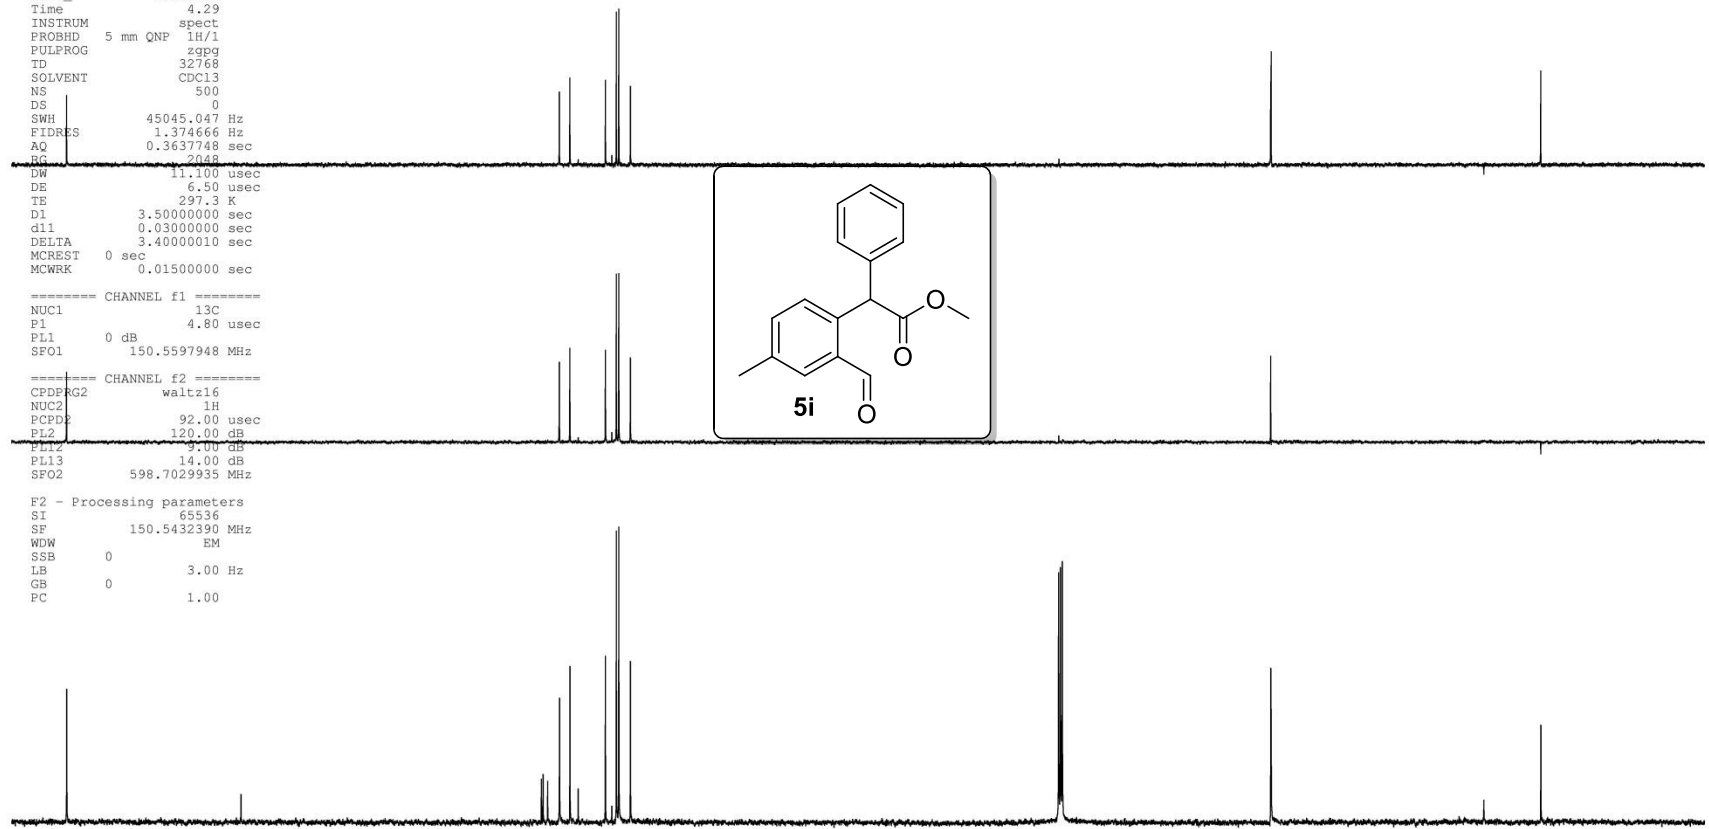

190 180 170 160 150 140 130 120 110 100 90 80 70 60 50 40 30 20 ppm

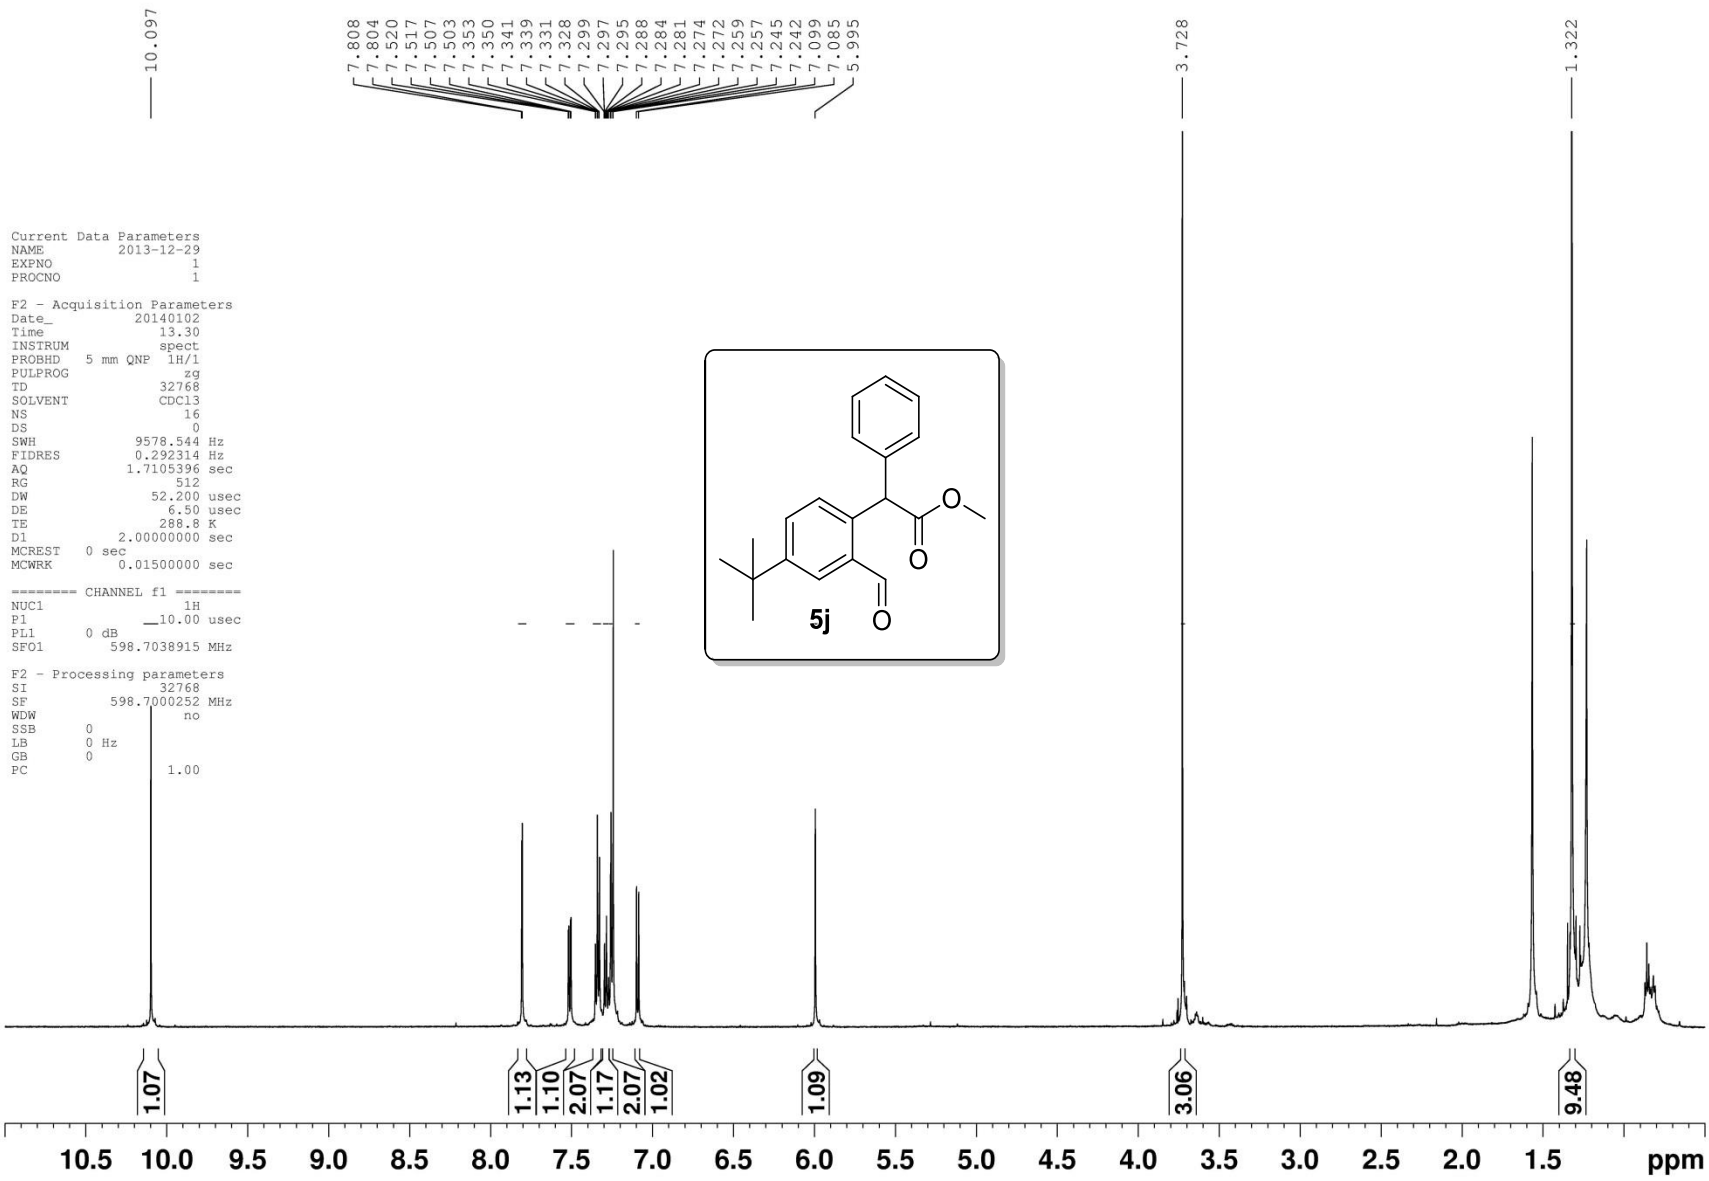

```

Current Data Parameters
NAME      2013-12-29
EXPNO    1
PROCNO   1

F2 - Acquisition Parameters
Date_    20140102
Time     13.30
INSTRUM  spect
PROBHD   5 mm QNP 1H/1
PULPROG  zg
TD        32768
SOLVENT  CDCl3
NS        16
DS        0
SWH      9578.544 Hz
FIDRES   0.292314 Hz
AQ        1.7105396 sec
RG        512
DW        52.200 usec
DE        6.50 usec
TE        288.8 K
D1        2.0000000 sec
MCREST    0 sec
MCWRK    0.01500000 sec

----- CHANNEL f1 -----
NUC1      1H
P1        10.00 usec
PL1       0 dB
SFO1      598.7038915 MHz

F2 - Processing parameters
SI        32768
SF        598.7000252 MHz
WDW       no
SSB       0
LB        0 Hz
GB        0
PC        1.00

```

7.808  
 7.804  
 7.520  
 7.517  
 7.507  
 7.503  
 7.353  
 7.350  
 7.341  
 7.339  
 7.331  
 7.328  
 7.299  
 7.297  
 7.295  
 7.288  
 7.284  
 7.281  
 7.274  
 7.272  
 7.259  
 7.257  
 7.245  
 7.242  
 7.099  
 7.085  
 5.995

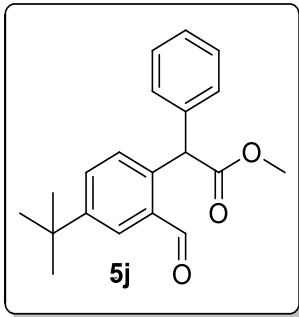

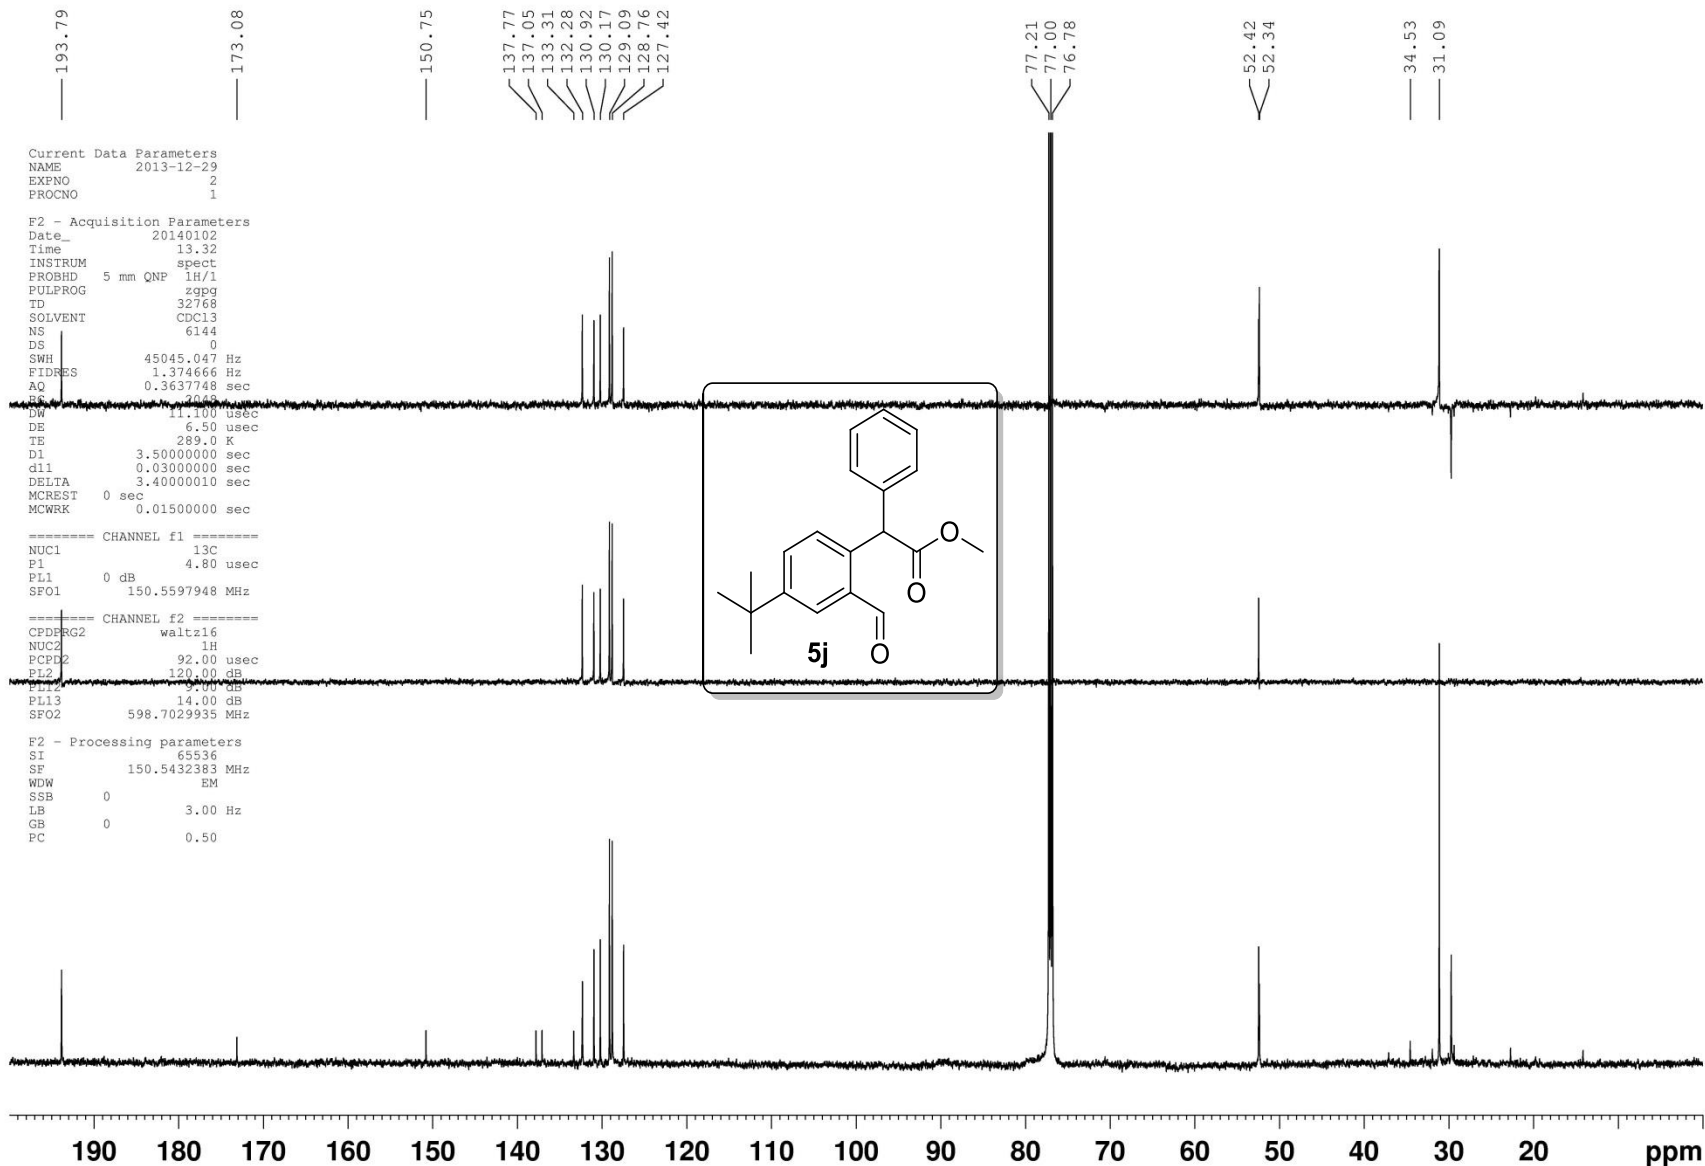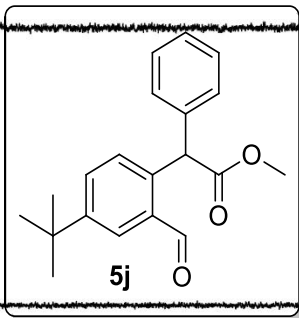

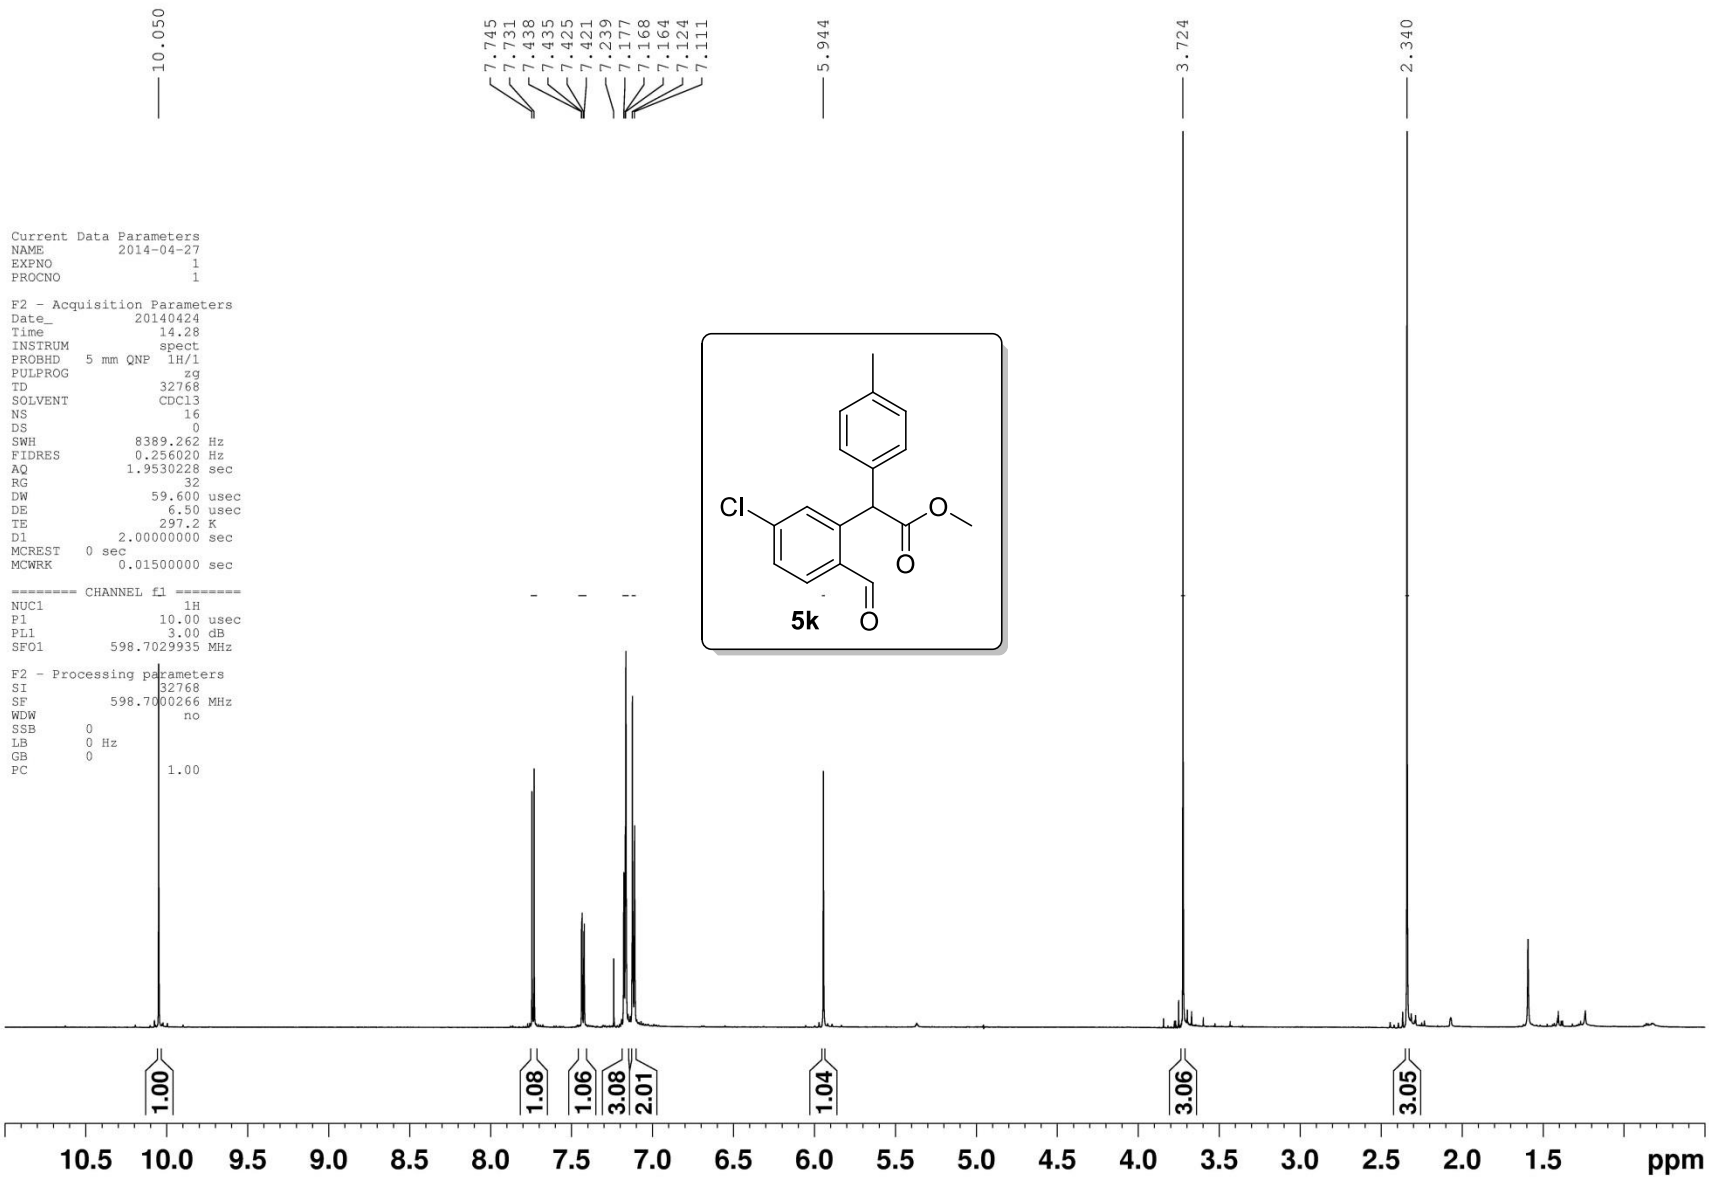

```

Current Data Parameters
NAME      2014-04-27
EXPNO    1
PROCNO   1

F2 - Acquisition Parameters
Date_    20140424
Time     14.28
INSTRUM  spect
PROBHD   5 mm QNP 1H/1
PULPROG  zg
TD        32768
SOLVENT  CDCl3
NS        16
DS        0
SWH      8389.262 Hz
FIDRES   0.256020 Hz
AQ        1.9530228 sec
RG         32
DW        59.600 usec
DE         6.50 usec
TE        297.2 K
D1        2.0000000 sec
MCREST   0 sec
MCWRK    0.01500000 sec

----- CHANNEL f1 -----
NUC1      1H
P1        10.00 usec
PL1       3.00 dB
SFO1      598.7029935 MHz

F2 - Processing parameters
SI        32768
SF        598.700266 MHz
WDW       no
SSB       0
LB        0 Hz
GB         0
PC        1.00
  
```

10.050

7.745  
7.731  
7.438  
7.435  
7.425  
7.421  
7.239  
7.177  
7.168  
7.164  
7.124  
7.111

5.944

3.724

2.340

1.00

1.08

1.06

3.08

2.01

1.04

3.06

3.05

10.5 10.0 9.5 9.0 8.5 8.0 7.5 7.0 6.5 6.0 5.5 5.0 4.5 4.0 3.5 3.0 2.5 2.0 1.5 ppm



Current Data Parameters  
 NAME Hao-ph-Me-aldehyde  
 EXPNO 2  
 PROCNO 1

F2 - Acquisition Parameters  
 Date\_ 20140424  
 Time 5.03  
 INSTRUM spect  
 PROBHD 5 mm QNP 1H/1  
 PULPROG zgpg  
 TD 32768  
 SOLVENT CDC13  
 NS 5120  
 DS 0  
 SWH 45045.047 Hz  
 FIDRES 1.374666 Hz  
 AQ 0.3637748 sec  
 RG 2048  
 DW 11.100 usec  
 DE 6.50 usec  
 TE 299.4 K  
 D1 3.50000000 sec  
 d11 0.03000000 sec  
 DELTA 3.40000010 sec  
 MCREST 0.00000000 sec  
 MCWRK 0.01500000 sec

==== CHANNEL f1 =====  
 NUC1 13C  
 P1 4.80 usec  
 PL1 0.00 dB  
 SFO1 150.5597948 MHz

==== CHANNEL f2 =====  
 CPDPRG2 waltz16  
 NUC2 1H  
 PCPD2 92.00 usec  
 PL2 120.00 dB  
 PL12 9.00 dB  
 PL13 14.00 dB  
 SFO2 598.7029935 MHz

F2 - Processing parameters  
 SI 65536  
 SF 150.5432404 MHz  
 WDW EM  
 SSB 0  
 LB 3.00 Hz  
 GB 0  
 PC 1.00

1D NMR plot parameters  
 CX 20.00 cm  
 CY 4.00 cm  
 F1P 200.000 ppm  
 F1 30108.65 Hz  
 F2P -10.000 ppm  
 F2 -1505.43 Hz

142.12  
 140.45  
 137.60  
 136.04  
 133.70  
 132.11  
 130.73  
 129.76  
 128.85  
 127.94

77.21  
 77.00  
 76.79

52.45  
 52.21

21.08

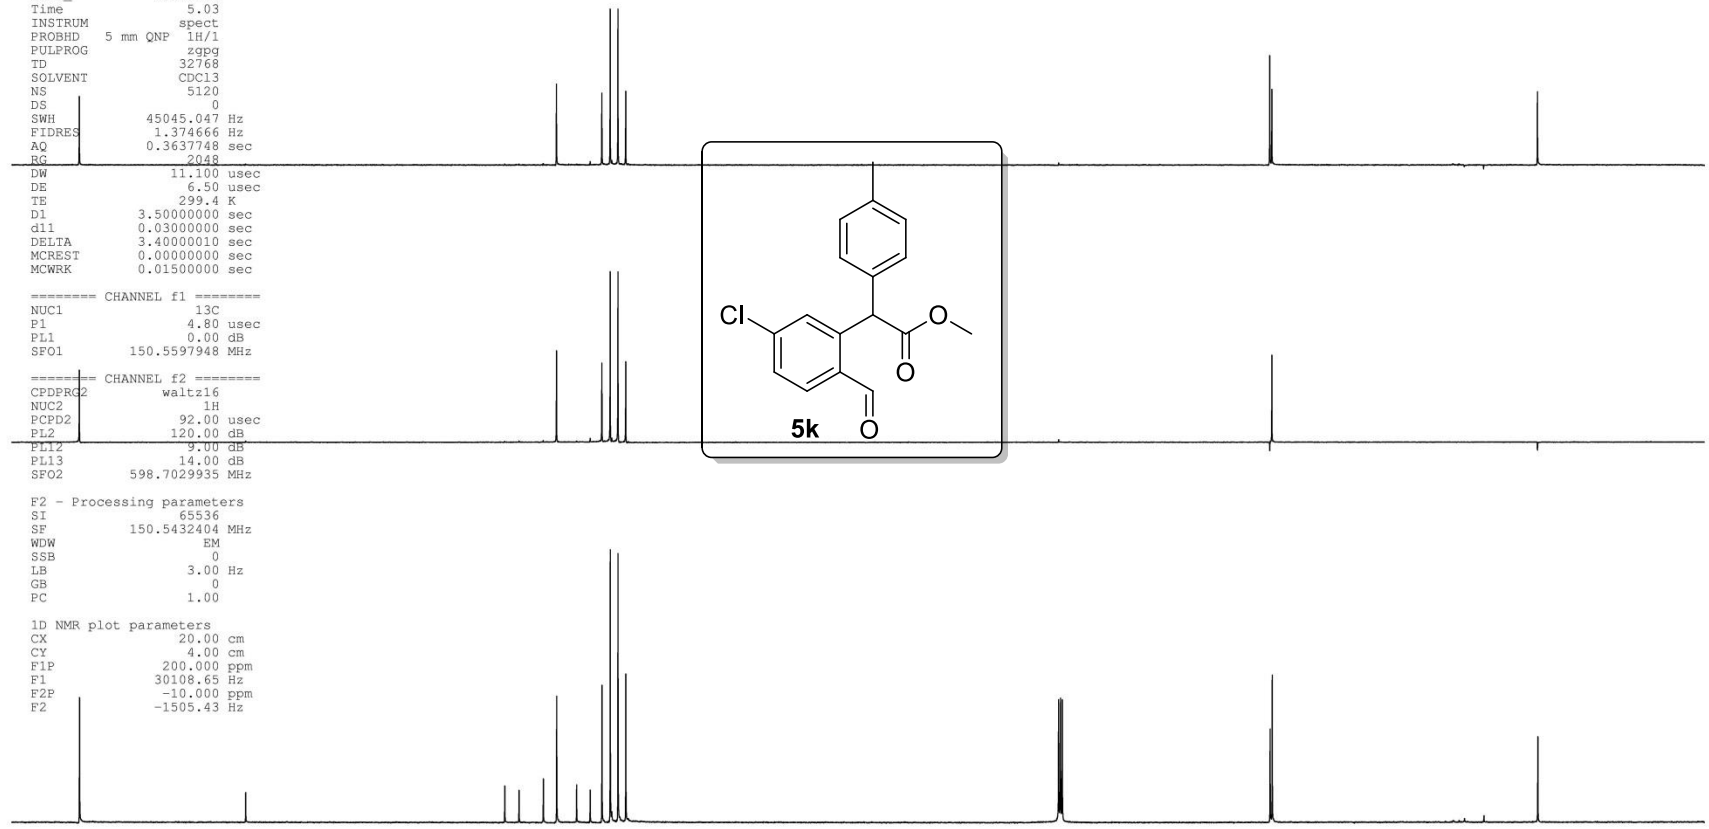

190 180 170 160 150 140 130 120 110 100 90 80 70 60 50 40 30 20 ppm

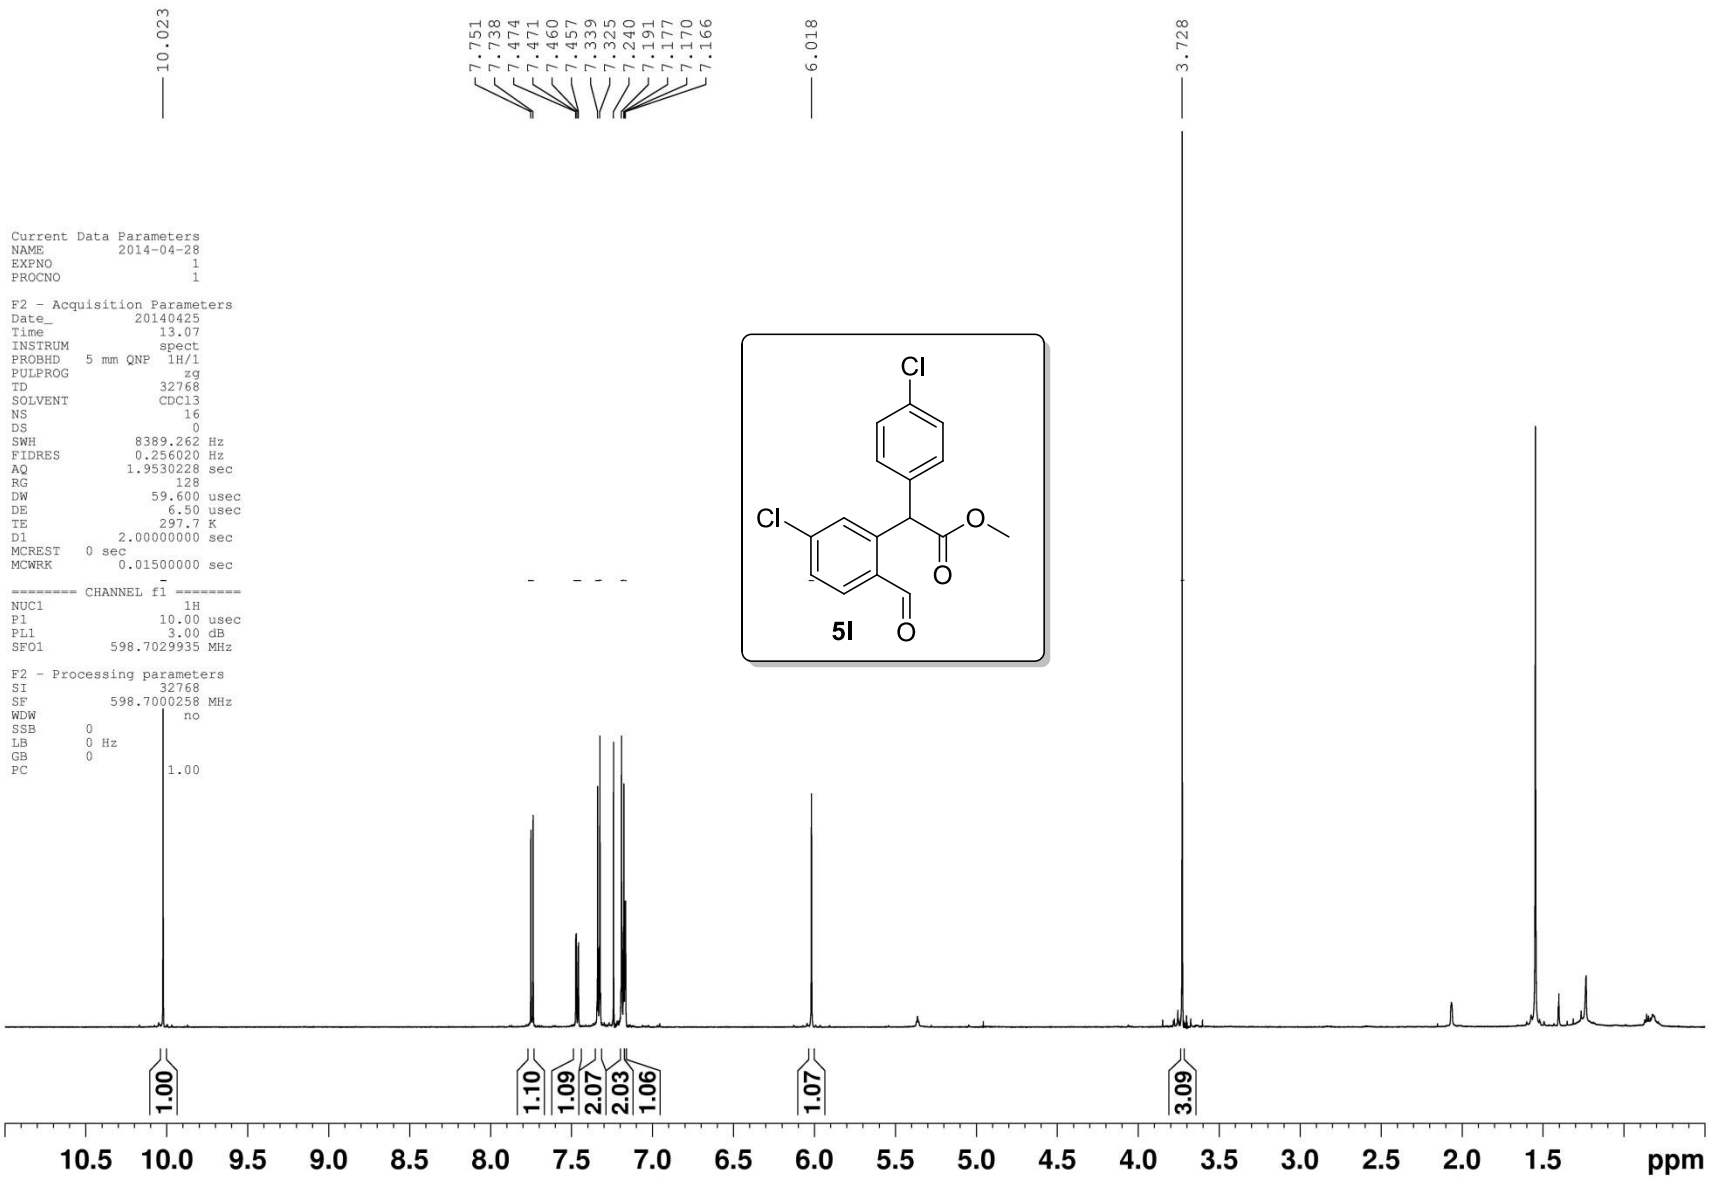

Current Data Parameters  
 NAME 2014-04-28  
 EXPNO 1  
 PROCNO 1

F2 - Acquisition Parameters  
 Date\_ 20140425  
 Time 13.07  
 INSTRUM spect  
 PROBHD 5 mm QNP 1H/1  
 PULPROG zg  
 TD 32768  
 SOLVENT CDCl3  
 NS 16  
 DS 0  
 SWH 8389.262 Hz  
 FIDRES 0.256020 Hz  
 AQ 1.9530228 sec  
 RG 128  
 DW 59.600 usec  
 DE 6.50 usec  
 TE 297.7 K  
 D1 2.0000000 sec  
 MCREST 0 sec  
 MCWRK 0.01500000 sec

----- CHANNEL f1 -----  
 NUC1 1H  
 P1 10.00 usec  
 PL1 3.00 dB  
 SFO1 598.7029935 Mhz

F2 - Processing parameters  
 SI 32768  
 SF 598.7000258 Mhz  
 WDW no  
 SSB 0  
 LB 0 Hz  
 GB 0  
 PC 1.00

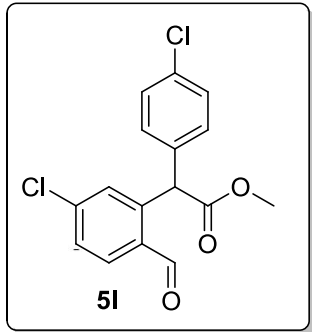

192.02  
172.01

Current Data Parameters  
NAME 2014-04-28  
EXPNO 2  
PROCNO 1

F2 - Acquisition Parameters  
Date\_ 20140425  
Time 13.10  
INSTRUM spect  
PROBHD 5 mm QNP 1H/1  
PULPROG zgpg  
TD 32768  
SOLVENT CDC13  
NS 5120  
DS 0  
SWH 45045.047 Hz  
FIDRES 1.374666 Hz  
AQ 0.3637748 sec  
RG 2048  
DW 11.100 usec  
DE 6.50 usec  
TE 298.5 K  
D1 3.50000000 sec  
d11 0.03000000 sec  
DELTA 3.40000010 sec  
MCREST 0 sec  
MCWRK 0.01500000 sec

==== CHANNEL f1 =====  
NUC1 13C  
P1 4.80 usec  
PL1 0 dB  
SFO1 150.5597948 MHz

==== CHANNEL f2 =====  
CPDPRG2 waltz16  
NUC2 1H  
PCPD2 92.00 usec  
PL2 120.00 dB  
PL12 9.00 dB  
PL13 14.00 dB  
SFO2 598.7029935 MHz

F2 - Processing parameters  
SI 65536  
SF 150.5432363 MHz  
WDW EM  
SSB 0  
LB 3.00 Hz  
GB 0  
PC 1.00

141.27  
140.62  
136.63  
135.32  
133.86  
131.99  
130.56  
130.44  
129.19  
128.23

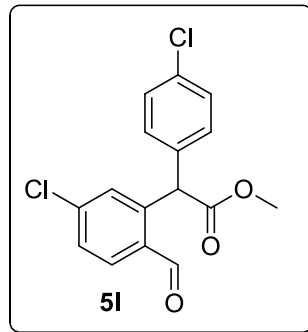

77.21  
77.00  
76.78

52.62  
51.69

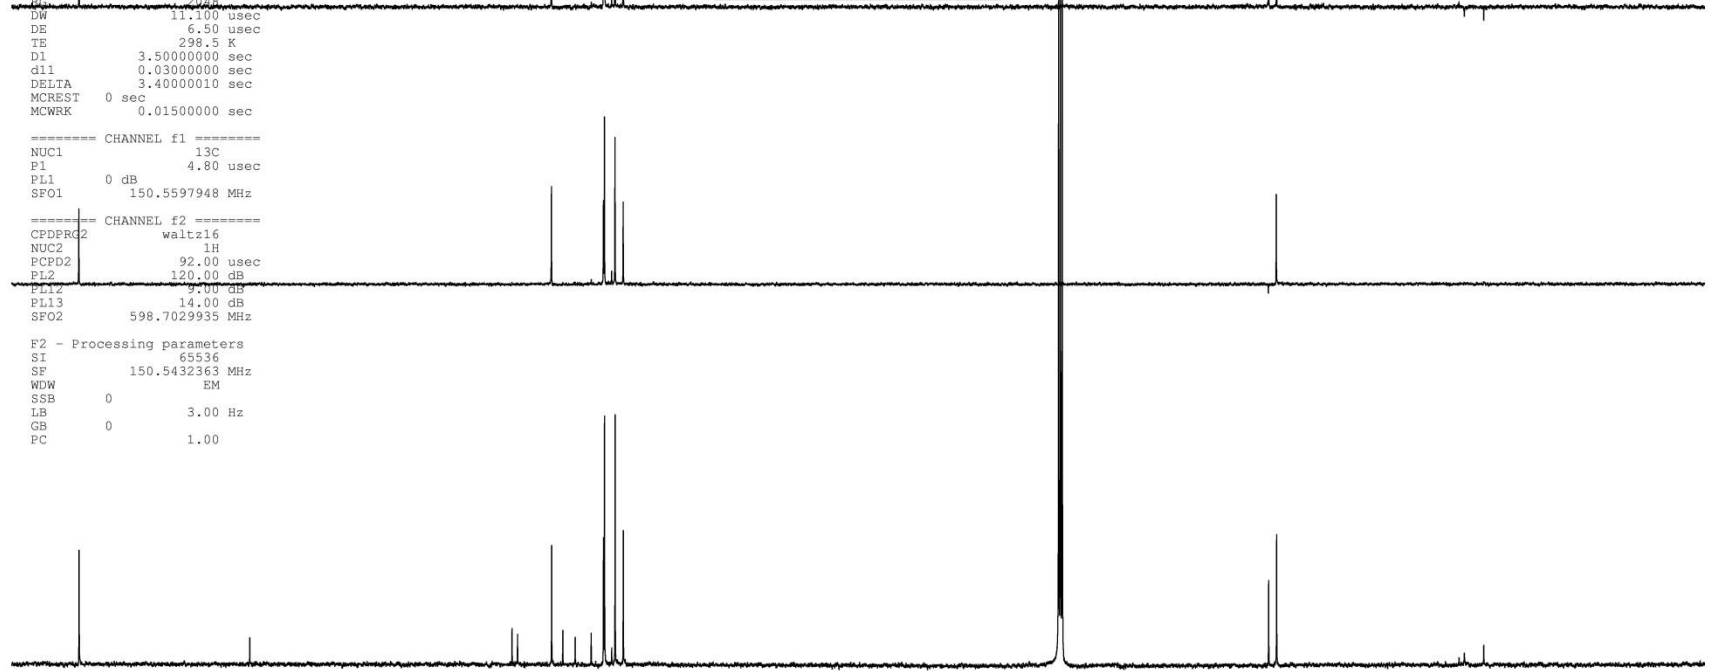

190 180 170 160 150 140 130 120 110 100 90 80 70 60 50 40 30 20 ppm

Current Data Parameters  
 NAME 2013-11-09  
 EXPNO 1  
 PROCNO 1

F2 - Acquisition Parameters  
 Date\_ 20131111  
 Time 6.17  
 INSTRUM spect  
 PROBHD 5 mm QNP 1H/1  
 PULPROG zg  
 TD 32768  
 SOLVENT CDCl3  
 NS 16  
 DS 0  
 SWH 8389.262 Hz  
 FIDRES 0.256020 Hz  
 AQ 1.9530228 sec  
 RG 512  
 DW 59.600 usec  
 DE 6.50 usec  
 TE 490.3 K  
 D1 2.0000000 sec  
 MCREST 0 sec  
 MCWRK 0.0150000 sec

----- CHANNEL f1 -----  
 NUC1 1H  
 P1 10.00 usec  
 PL1 0 dB  
 SFO1 598.7034418 MHz

F2 - Processing parameters  
 SI 32768  
 SF 598.7000262 MHz  
 WDW no  
 SSB 0  
 LB 0 Hz  
 GB 0  
 PC 1.00

7.795  
7.792  
7.781  
7.778  
7.766  
7.604  
7.602  
7.595  
7.593  
7.592  
7.590  
7.589  
7.582  
7.580  
7.577  
7.479  
7.476  
7.468  
7.466  
7.465  
7.464  
7.453  
7.438  
7.434  
7.424  
7.420  
7.420  
7.350  
7.346  
7.295  
7.295  
7.281  
7.240

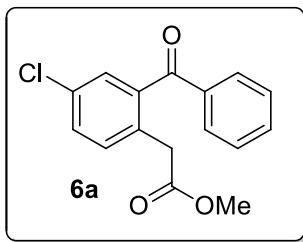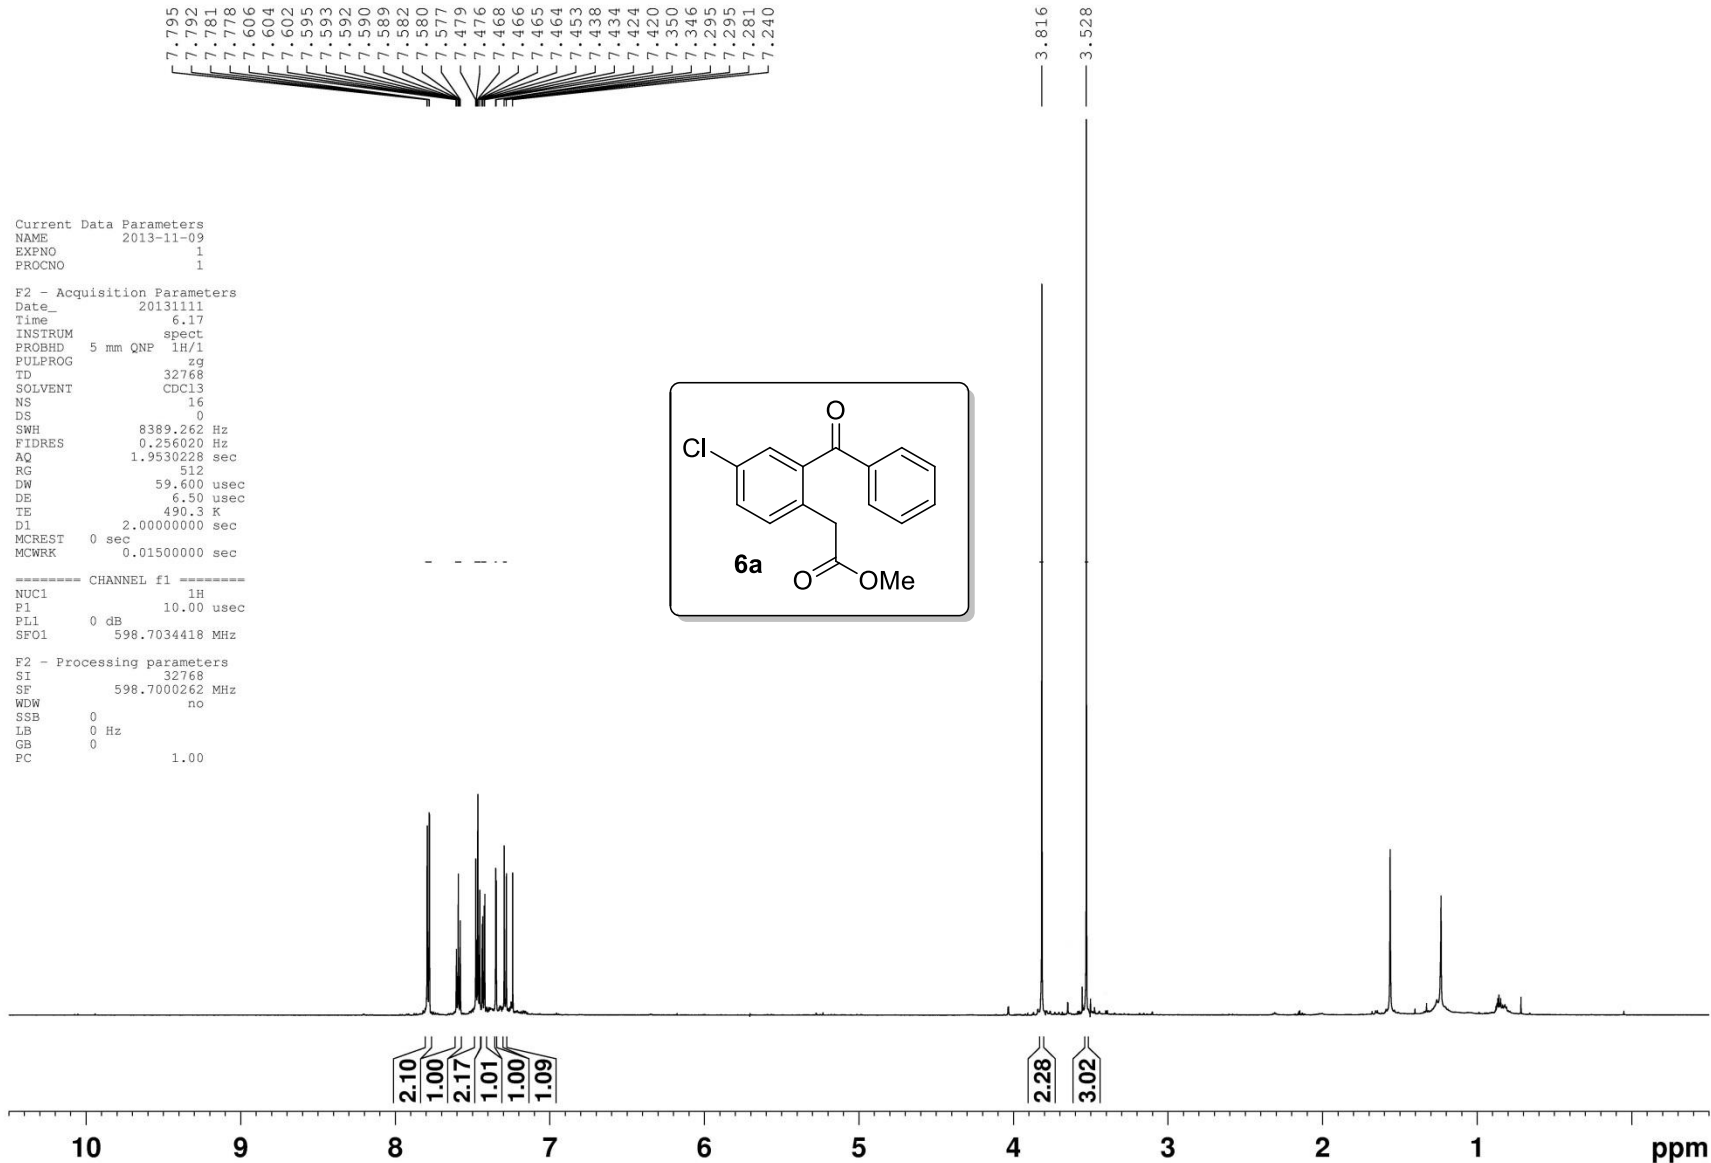

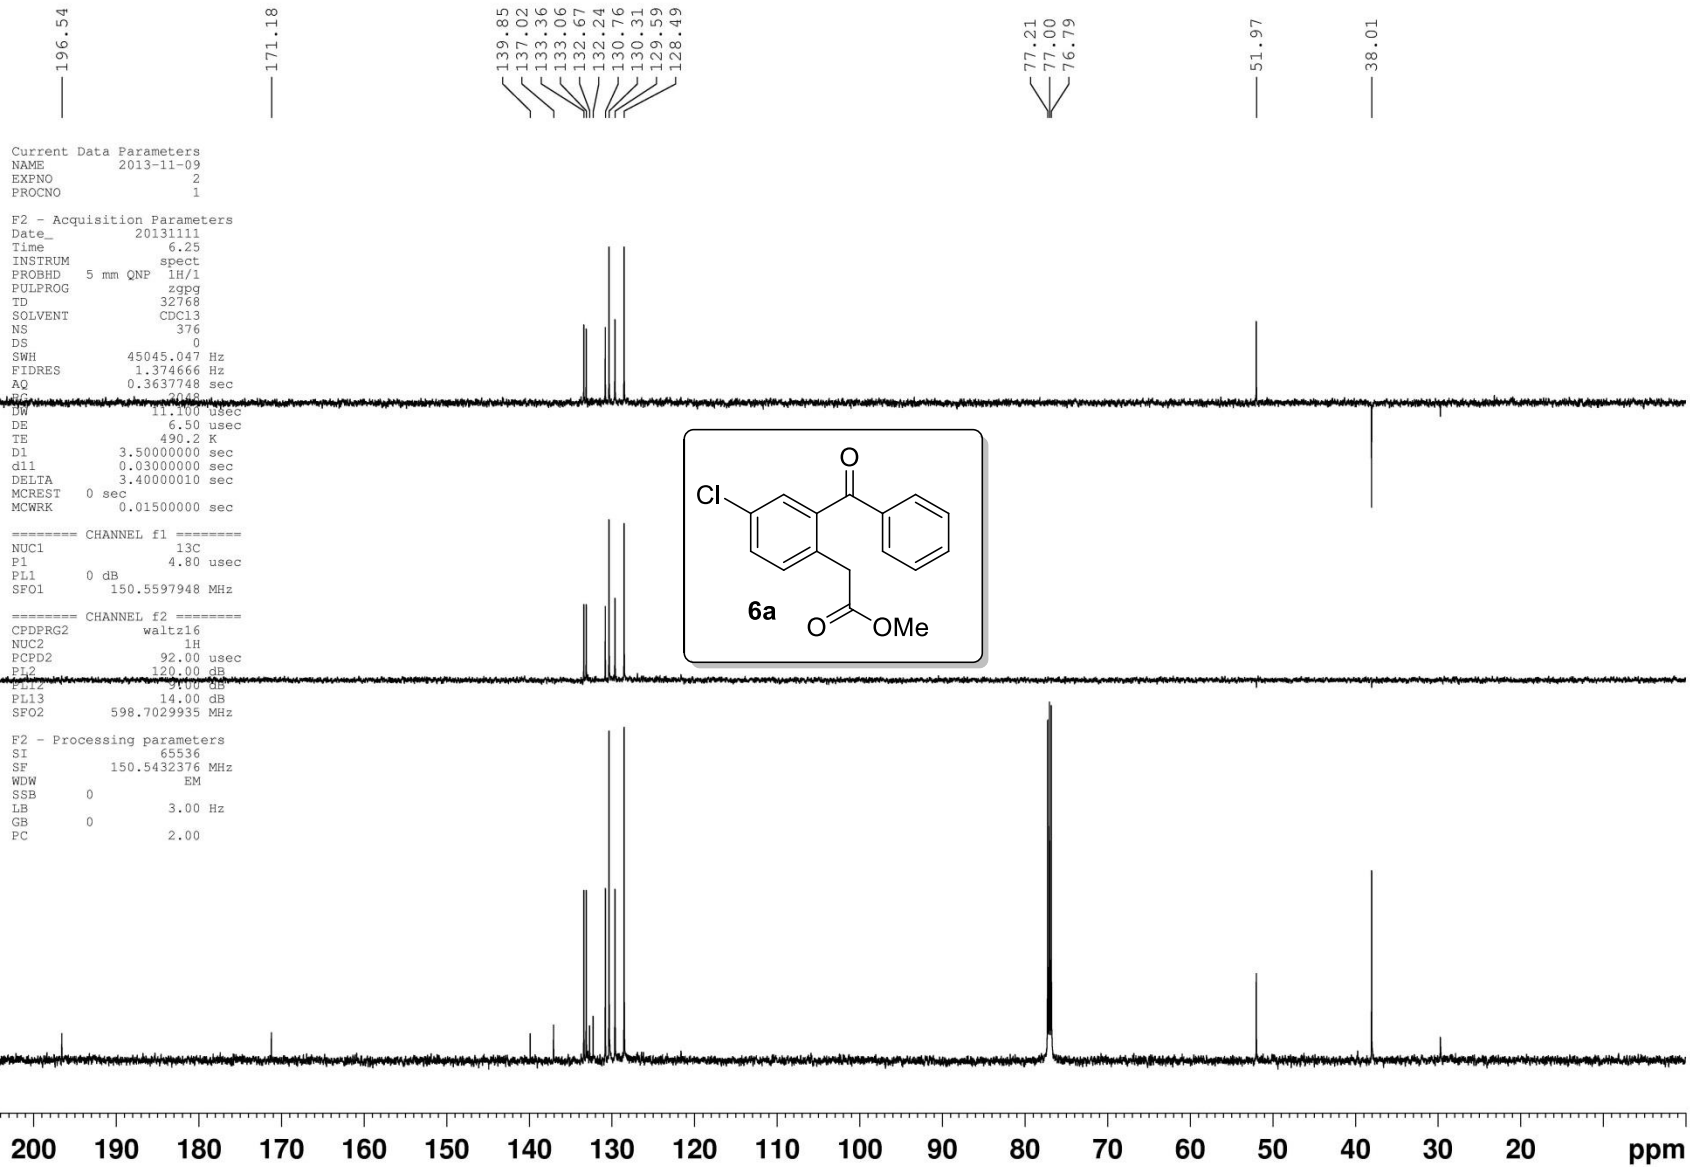

Current Data Parameters  
 NAME 2013-11-09  
 EXPNO 2  
 PROCNO 1

F2 - Acquisition Parameters  
 Date\_ 20131111  
 Time 6.25  
 INSTRUM spect  
 PROBHD 5 mm QNP 1H/1  
 PULPROG zgpg  
 TD 32768  
 SOLVENT CDCl3  
 NS 376  
 DS 0  
 SWH 45045.047 Hz  
 FIDRES 1.374666 Hz  
 AQ 0.3637748 sec

DE 11.100 usec  
 TE 490.2 K  
 D1 3.50000000 sec  
 d11 0.03000000 sec  
 DELTA 3.40000010 sec  
 MCREST 0 sec  
 MCWRK 0.01500000 sec

==== CHANNEL f1 =====  
 NUC1 13C  
 P1 4.80 usec  
 PL1 0 dB  
 SFO1 150.5597948 MHz

==== CHANNEL f2 =====  
 CPDPRG2 waltz16  
 NUC2 1H  
 PCPD2 92.00 usec  
 PL2 120.00 dB  
 PL12 9.00 dB  
 PL13 14.00 dB  
 SFO2 598.7029935 MHz

F2 - Processing parameters  
 SI 65536  
 SF 150.5432376 MHz  
 WDW EM  
 SSB 0  
 LB 3.00 Hz  
 GB 0  
 PC 2.00

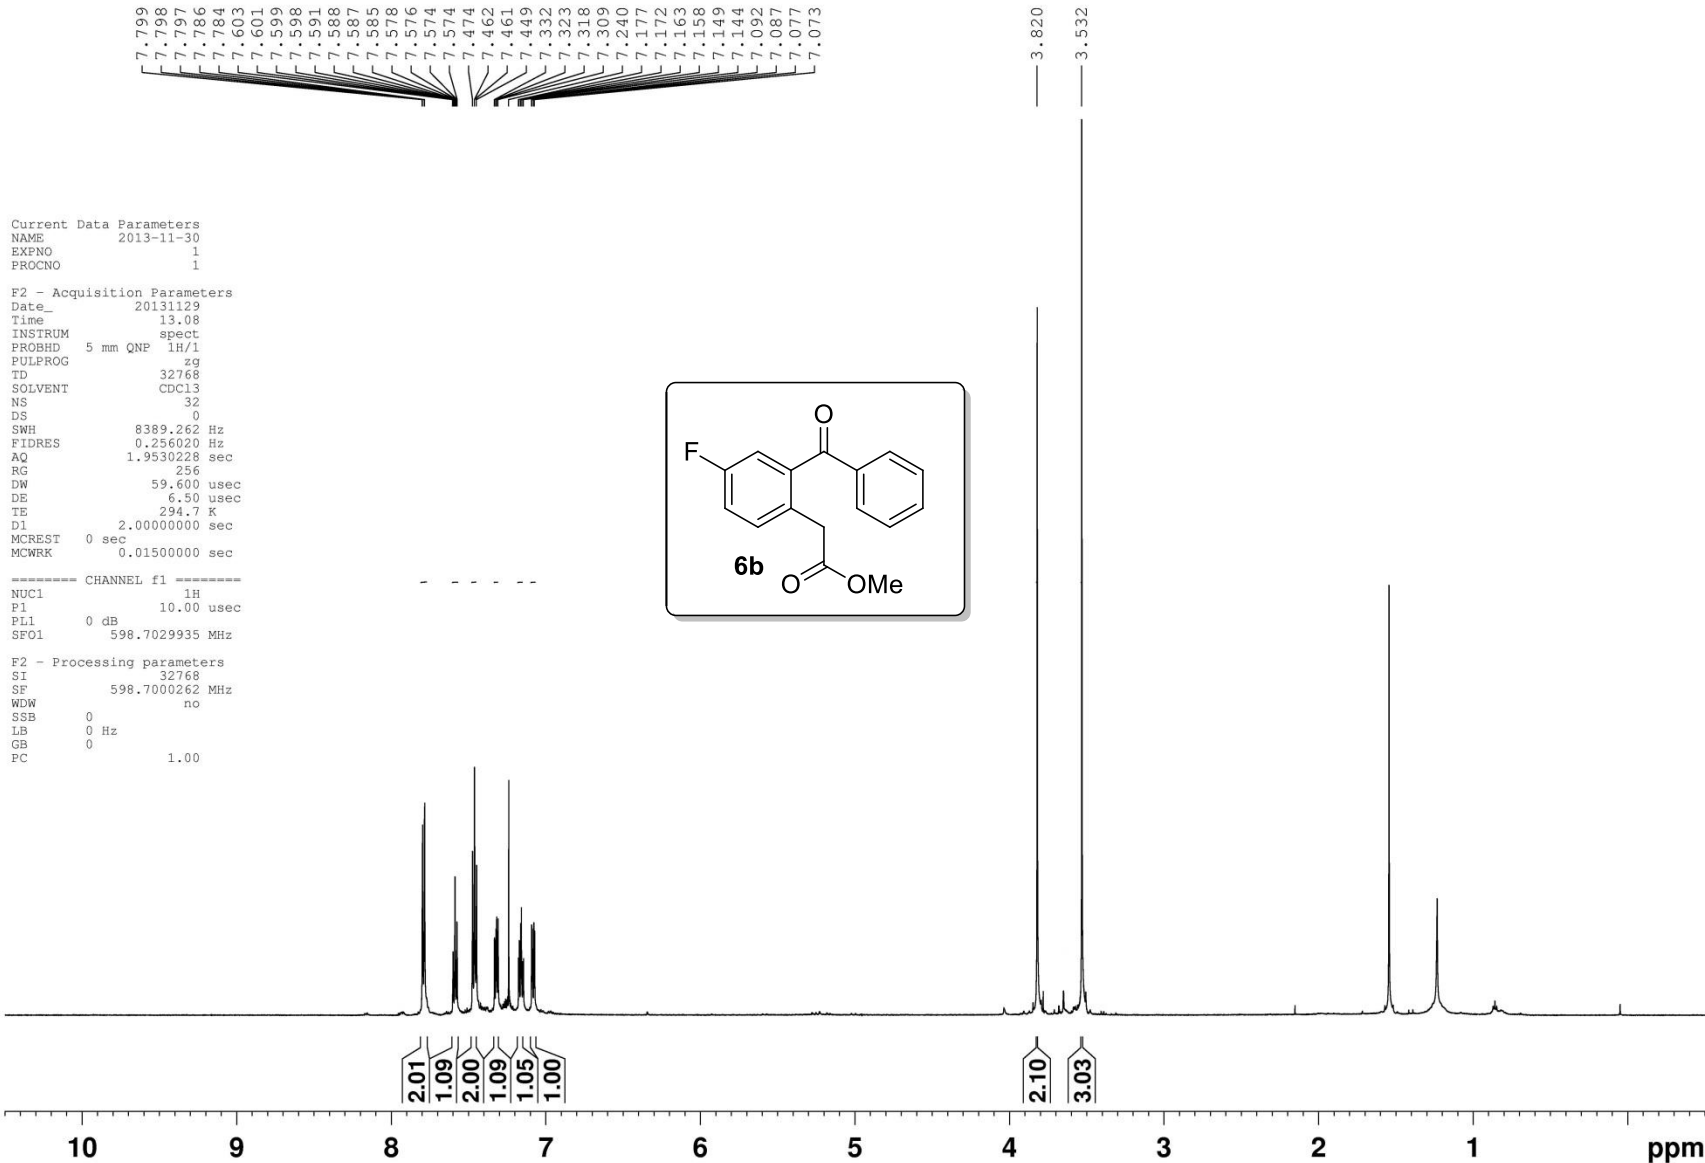

— 196.60

— 171.44

— 161.76  
— 160.11

— 139.98  
— 139.94  
— 137.03  
— 133.42  
— 133.37  
— 133.32  
— 130.30  
— 129.55  
— 128.45  
— 117.73  
— 117.59  
— 116.91  
— 116.75

— 77.21  
— 77.00  
— 76.78

— 51.93

— 37.84

Current Data Parameters  
NAME 2013-11-30  
EXPNO 2  
PROCNO 1

F2 - Acquisition Parameters  
Date\_ 20131129  
Time 13.16  
INSTRUM spect  
PROBHD 5 mm QNP 1H/1  
PULPROG zgpg  
TD 32768  
SOLVENT CDCl3  
NS 6144  
DS 0  
SWH 45045.047 Hz  
FIDRES 1.374666 Hz  
AQ 0.3637748 sec  
RG 72048  
DW 11.100 usec  
DE 6.50 usec  
TE 296.4 K  
D1 3.50000000 sec  
d11 0.03000000 sec  
DELTA 3.40000010 sec  
MCREST 0 sec  
MCWRK 0.01500000 sec

==== CHANNEL f1 =====  
NUC1 13C  
P1 4.80 usec  
PL1 0 dB  
SFO1 150.5597948 MHz

==== CHANNEL f2 =====  
CPDPRG2 waltz16  
NUC2 1H  
PCPD2 92.00 usec  
PL2 120.00 dB  
PL12 9.00 dB  
PL13 14.00 dB  
SFO2 598.7029935 MHz

F2 - Processing parameters  
SI 65536  
SF 150.5432370 MHz  
WDW EM  
SSB 0  
LB 3.00 Hz  
GB 0  
PC 0.50

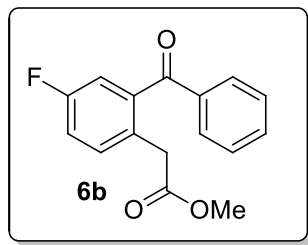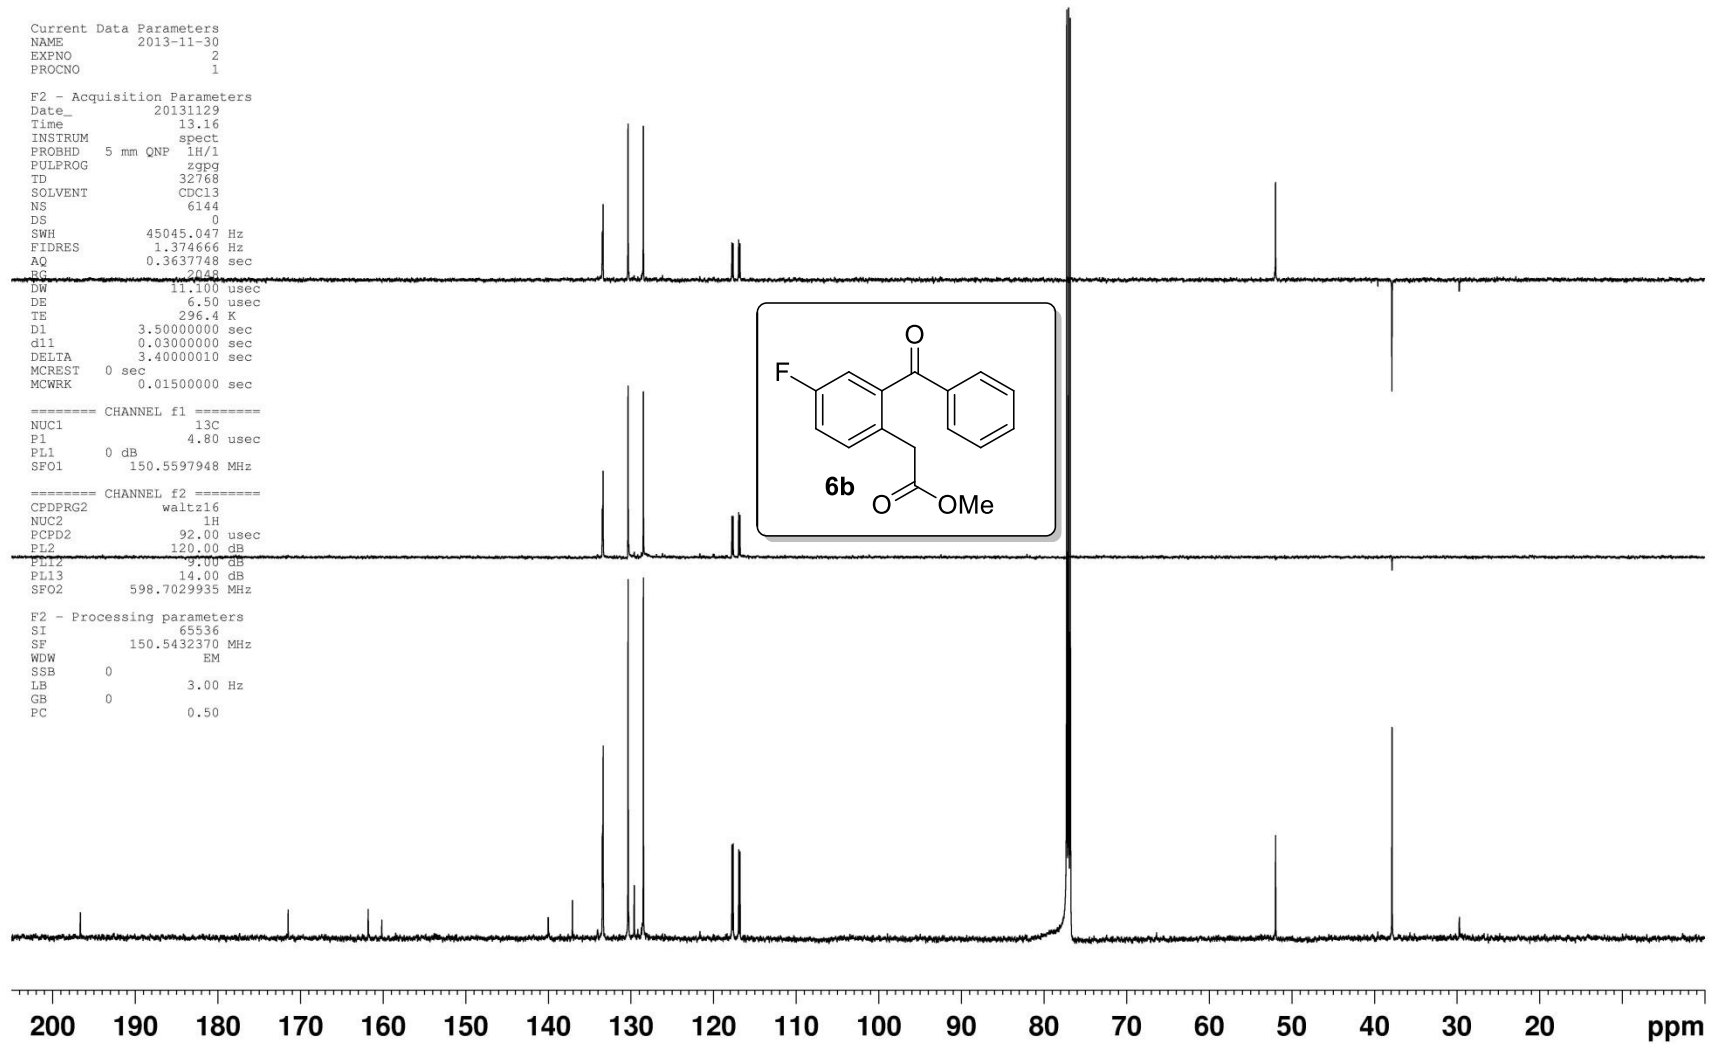

200 190 180 170 160 150 140 130 120 110 100 90 80 70 60 50 40 30 20 ppm

Current Data Parameters  
 NAME 2013-12-19  
 EXPNO 1  
 PROCNO 1

F2 - Acquisition Parameters  
 Date\_ 20131218  
 Time 13.38  
 INSTRUM spect  
 PROBHD 5 mm QNP 1H/1  
 PULPROG zg  
 TD 32768  
 SOLVENT CDCl3  
 NS 32  
 DS 0  
 SWH 8382.222 Hz  
 FIDRES 0.255805 Hz  
 AQ 1.9546632 sec  
 RG 512  
 DW 59.650 usec  
 DE 6.50 usec  
 TE 294.7 K  
 D1 2.0000000 sec  
 MCREST 0 sec  
 MCWRK 0.01500000 sec

----- CHANNEL f1 -----  
 NUC1 1H  
 P1 10.00 usec  
 PL1 0 dB  
 SFO1 598.7029935 MHz

F2 - Processing parameters  
 SI 32768  
 SF 598.7000264 MHz  
 WDW no  
 SSB 0  
 LB 0 Hz  
 GB 0  
 PC 1.00

7.767  
 7.765  
 7.754  
 7.751  
 7.586  
 7.584  
 7.572  
 7.561  
 7.559  
 7.462  
 7.449  
 7.436  
 7.415  
 7.406  
 7.401  
 7.391  
 7.240  
 7.084  
 7.080  
 7.069  
 7.064  
 7.022  
 7.018  
 7.008  
 7.004  
 6.995  
 6.990

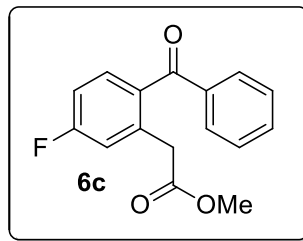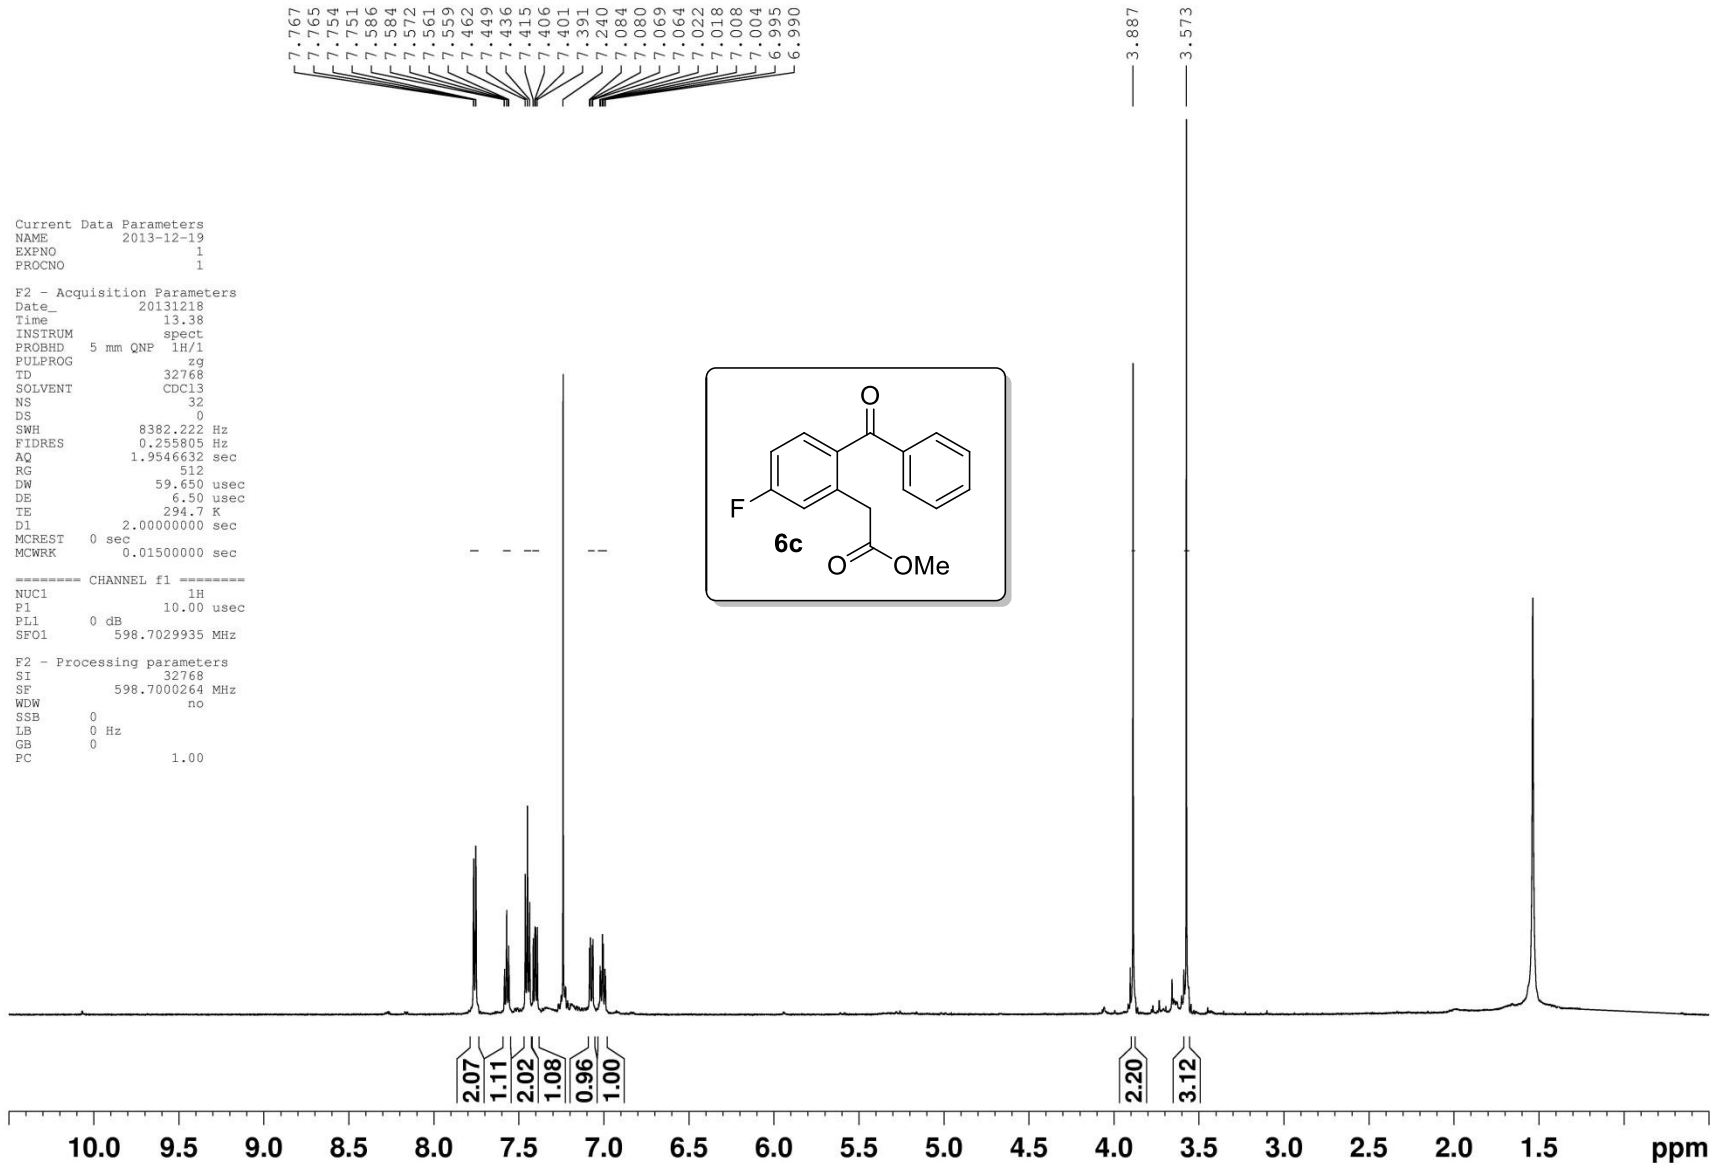



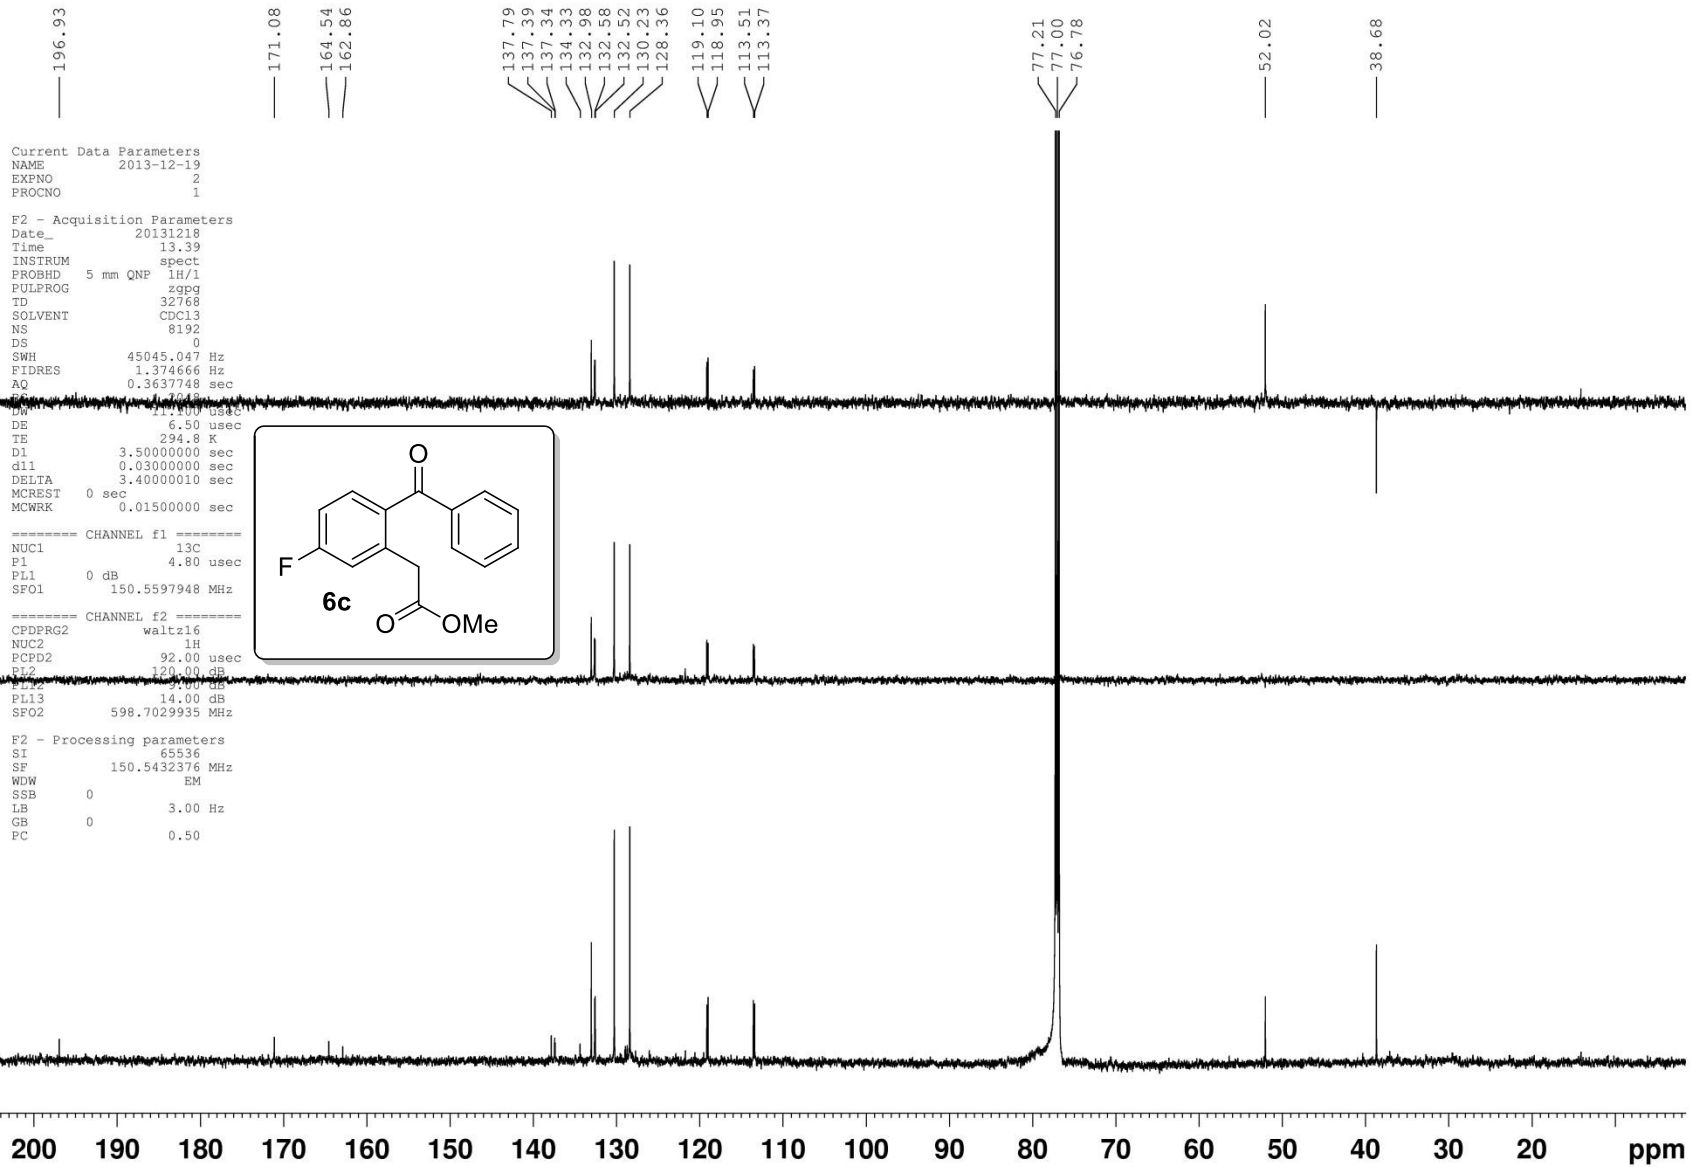

Current Data Parameters  
 NAME 2013-12-19  
 EXPNO 2  
 PROCNO 1

F2 - Acquisition Parameters  
 Date\_ 20131218  
 Time 13.39  
 INSTRUM spect  
 PROBHD 5 mm QNP 1H/1  
 PULPROG zgpg  
 TD 32768  
 SOLVENT CDCl3  
 NS 8192  
 DS 0  
 SWH 45045.047 Hz  
 FIDRES 1.374666 Hz  
 AQ 0.3637748 sec  
 DM 11.100 usec  
 DE 6.50 usec  
 TE 294.8 K  
 D1 3.50000000 sec  
 d11 0.03000000 sec  
 DELTA 3.40000010 sec  
 MCREST 0 sec  
 MCWRK 0.01500000 sec

----- CHANNEL f1 -----  
 NUC1 13C  
 P1 4.80 usec  
 PL1 0 dB  
 SFO1 150.5597948 MHz

----- CHANNEL f2 -----  
 CPDPRG2 waltz16  
 NUC2 1H  
 PCPD2 92.00 usec  
 PL2 120.00 dB  
 PL3 14.00 dB  
 SFO2 598.7029935 MHz

F2 - Processing parameters  
 SI 65536  
 SF 150.5432376 MHz  
 WDW EM  
 SSB 0  
 LB 3.00 Hz  
 GB 0  
 PC 0.50

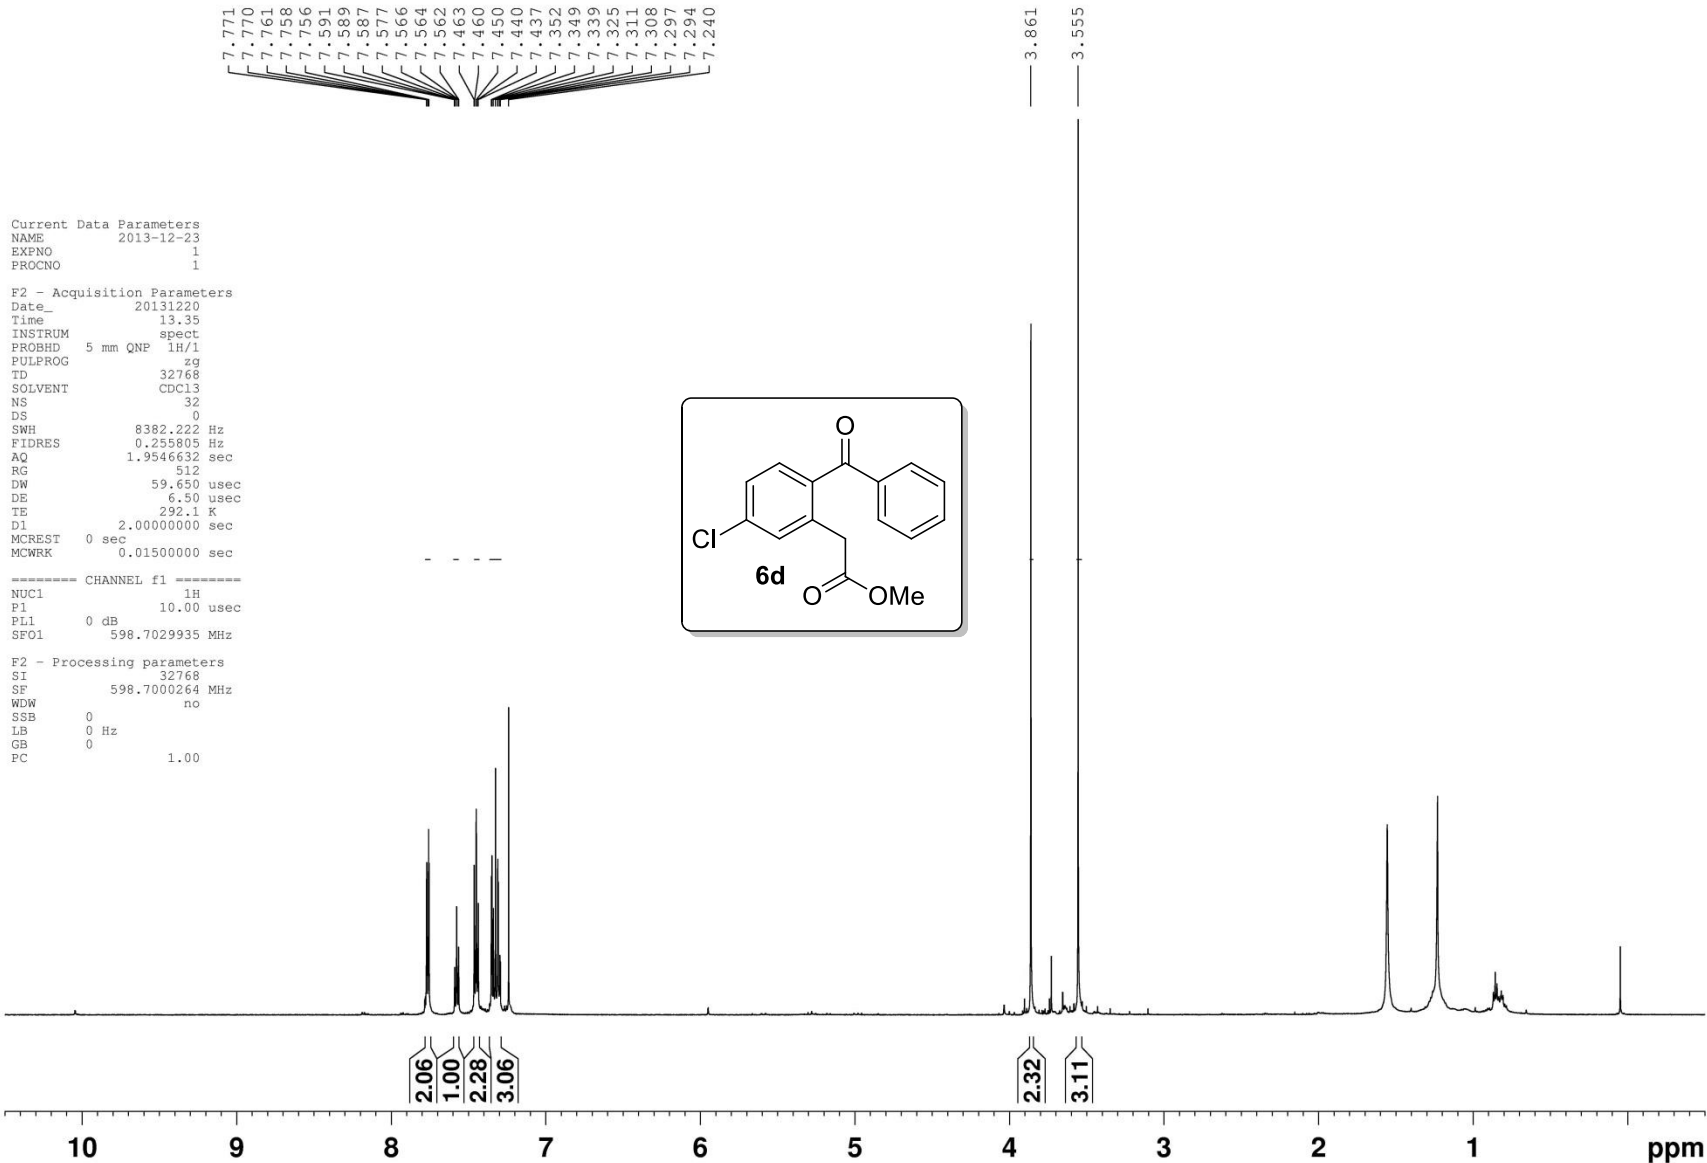

— 197.01

— 171.04

137.48  
136.86  
136.56  
136.06  
133.14  
131.91  
131.41  
130.26  
128.39  
126.73

77.21  
77.00  
76.79

— 52.04

— 38.43

Current Data Parameters  
NAME 2013-12-23  
EXPNO 2  
PROCNO 1

F2 - Acquisition Parameters  
Date\_ 20131220  
Time 13.37  
INSTRUM spect  
PROBHD 5 mm QNP 1H/1  
PULPROG zgpg  
TD 32768  
SOLVENT CDCl3  
NS 6144  
DS 0  
SWH 45045.047 Hz  
FIDRES 1.374666 Hz  
AQ 0.3637748 sec  
RG 2048  
DW 11.100 usec  
DE 6.50 usec  
TE 292.3 K  
D1 3.50000000 sec  
d11 0.03000000 sec  
DELTA 3.40000010 sec  
MCREST 0 sec  
MCWRK 0.01500000 sec

==== CHANNEL f1 =====  
NUC1 13C  
P1 4.80 usec  
PL1 0 dB  
SFO1 150.5597948 MHz  
  
==== CHANNEL f2 =====  
CPDPRG2 waltz16  
NUC2 1H  
PCPD2 92.00 usec  
PL2 120.00 dB  
PL12 9.00 dB  
PL13 14.00 dB  
SFO2 598.7029935 MHz

F2 - Processing parameters  
SI 65536  
SF 150.5432376 MHz  
WDW EM  
SSB 0  
LB 3.00 Hz  
GB 0  
PC 0.50

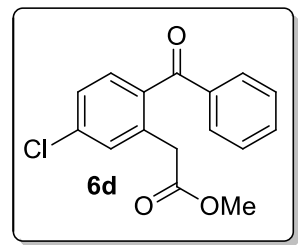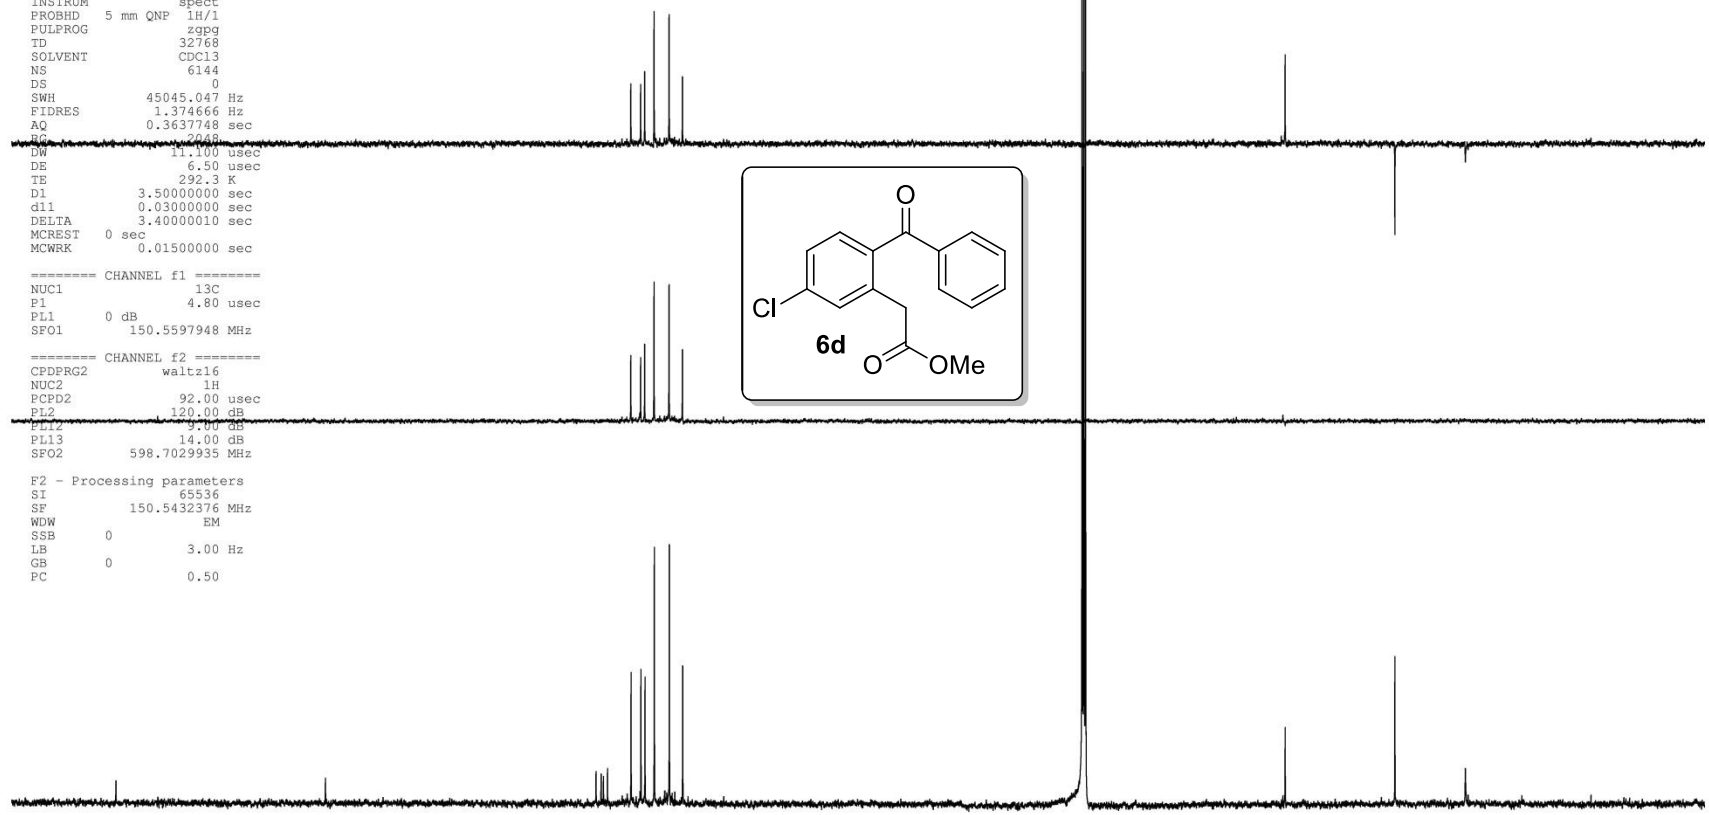

200 190 180 170 160 150 140 130 120 110 100 90 80 70 60 50 40 30 20 ppm

Current Data Parameters  
NAME 2013-12-27  
EXPNO 1  
PROCNO 1

F2 - Acquisition Parameters  
Date\_ 20131231  
Time 10.39  
INSTRUM spect  
PROBHD 5 mm QNP 1H/1  
PULPROG zg  
TD 32768  
SOLVENT CDC13  
NS 16  
DS 0  
SWH 9578.544 Hz  
FIDRES 0.292314 Hz  
AQ 1.7105396 sec  
RG 512  
DW 52.200 usec  
DE 6.50 usec  
TE 292.5 K  
D1 2.0000000 sec  
MCRCST 0 sec  
MCWRK 0.01500000 sec

----- CHANNEL f1 -----  
NUC1 1H  
P1 10.00 usec  
PL1 0 dB  
SFO1 598.7038915 MHz

F2 - Processing parameters  
SI 32768  
SF 598.7000261 MHz  
WDW no  
SSB 0  
LB 0 Hz  
GB 0  
PC 1.00

7.772  
7.770  
7.758  
7.756  
7.591  
7.589  
7.587  
7.577  
7.566  
7.564  
7.562  
7.514  
7.511  
7.474  
7.471  
7.462  
7.457  
7.450  
7.439  
7.436  
7.262  
7.248  
7.240

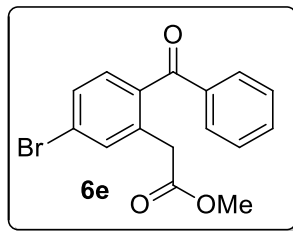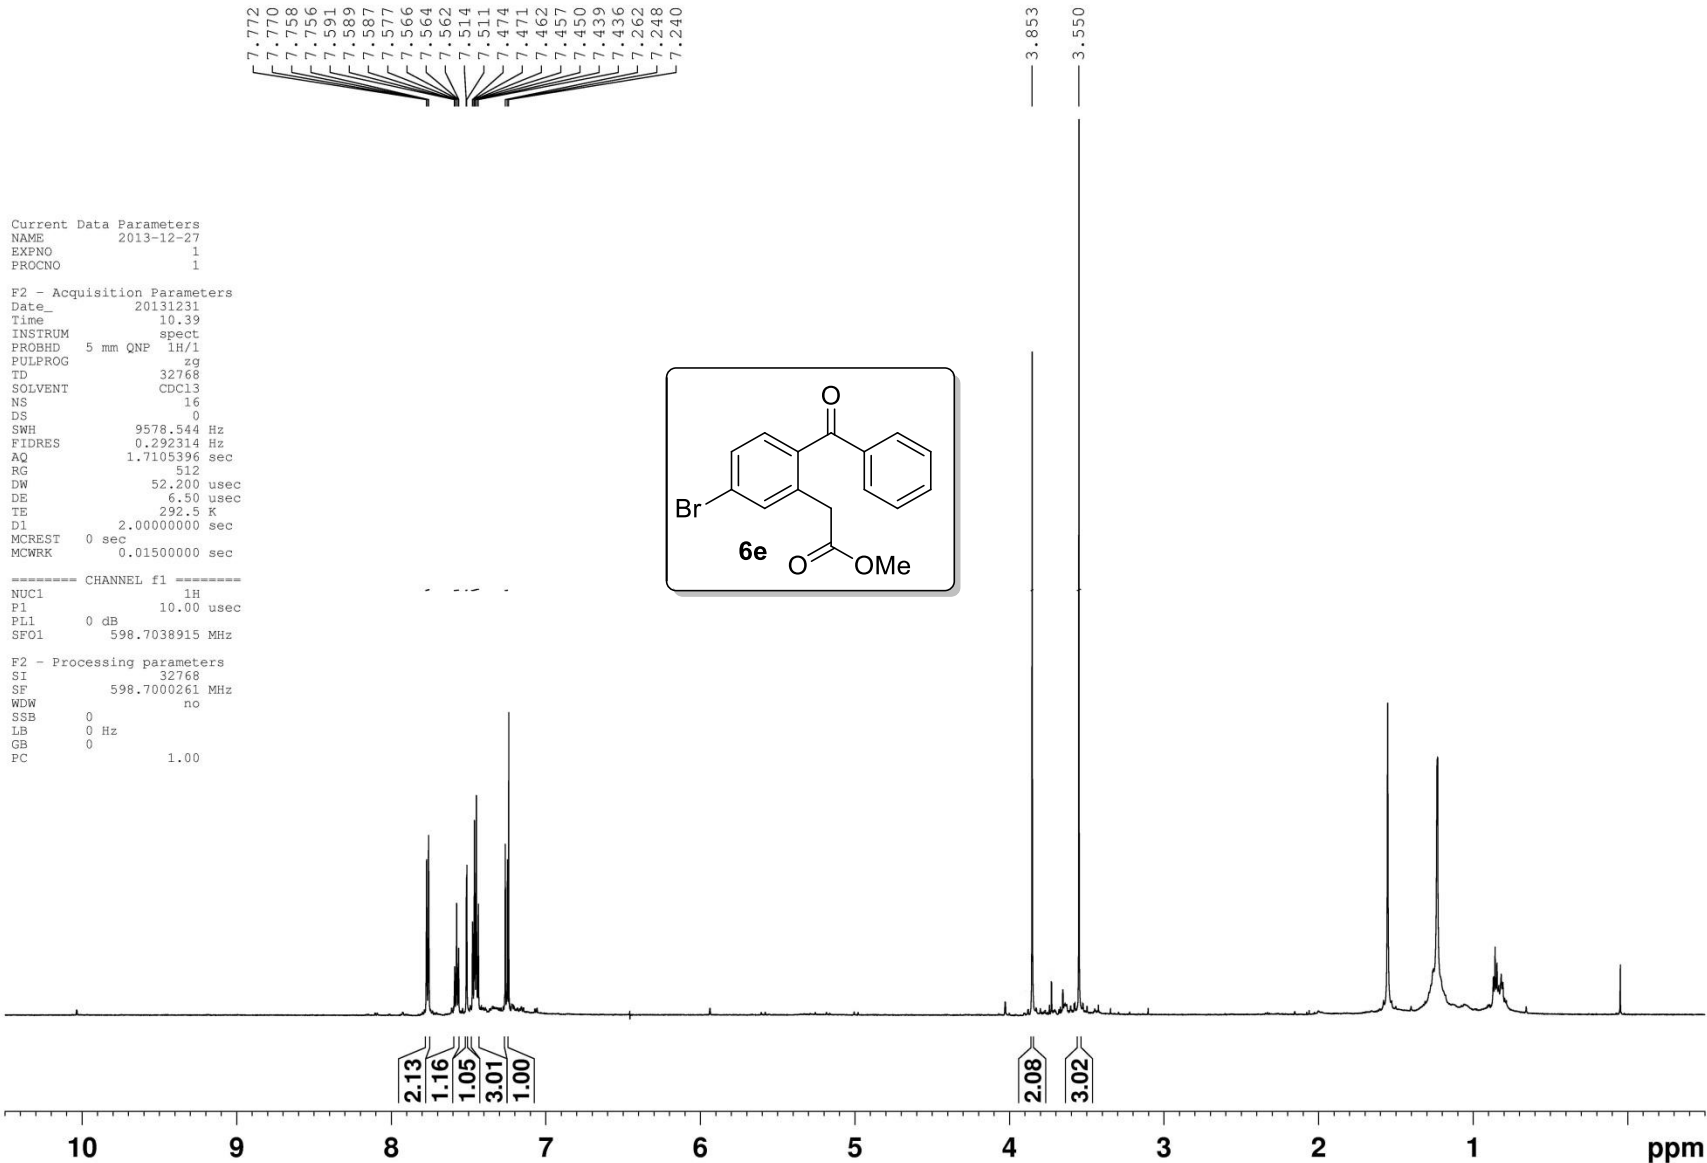

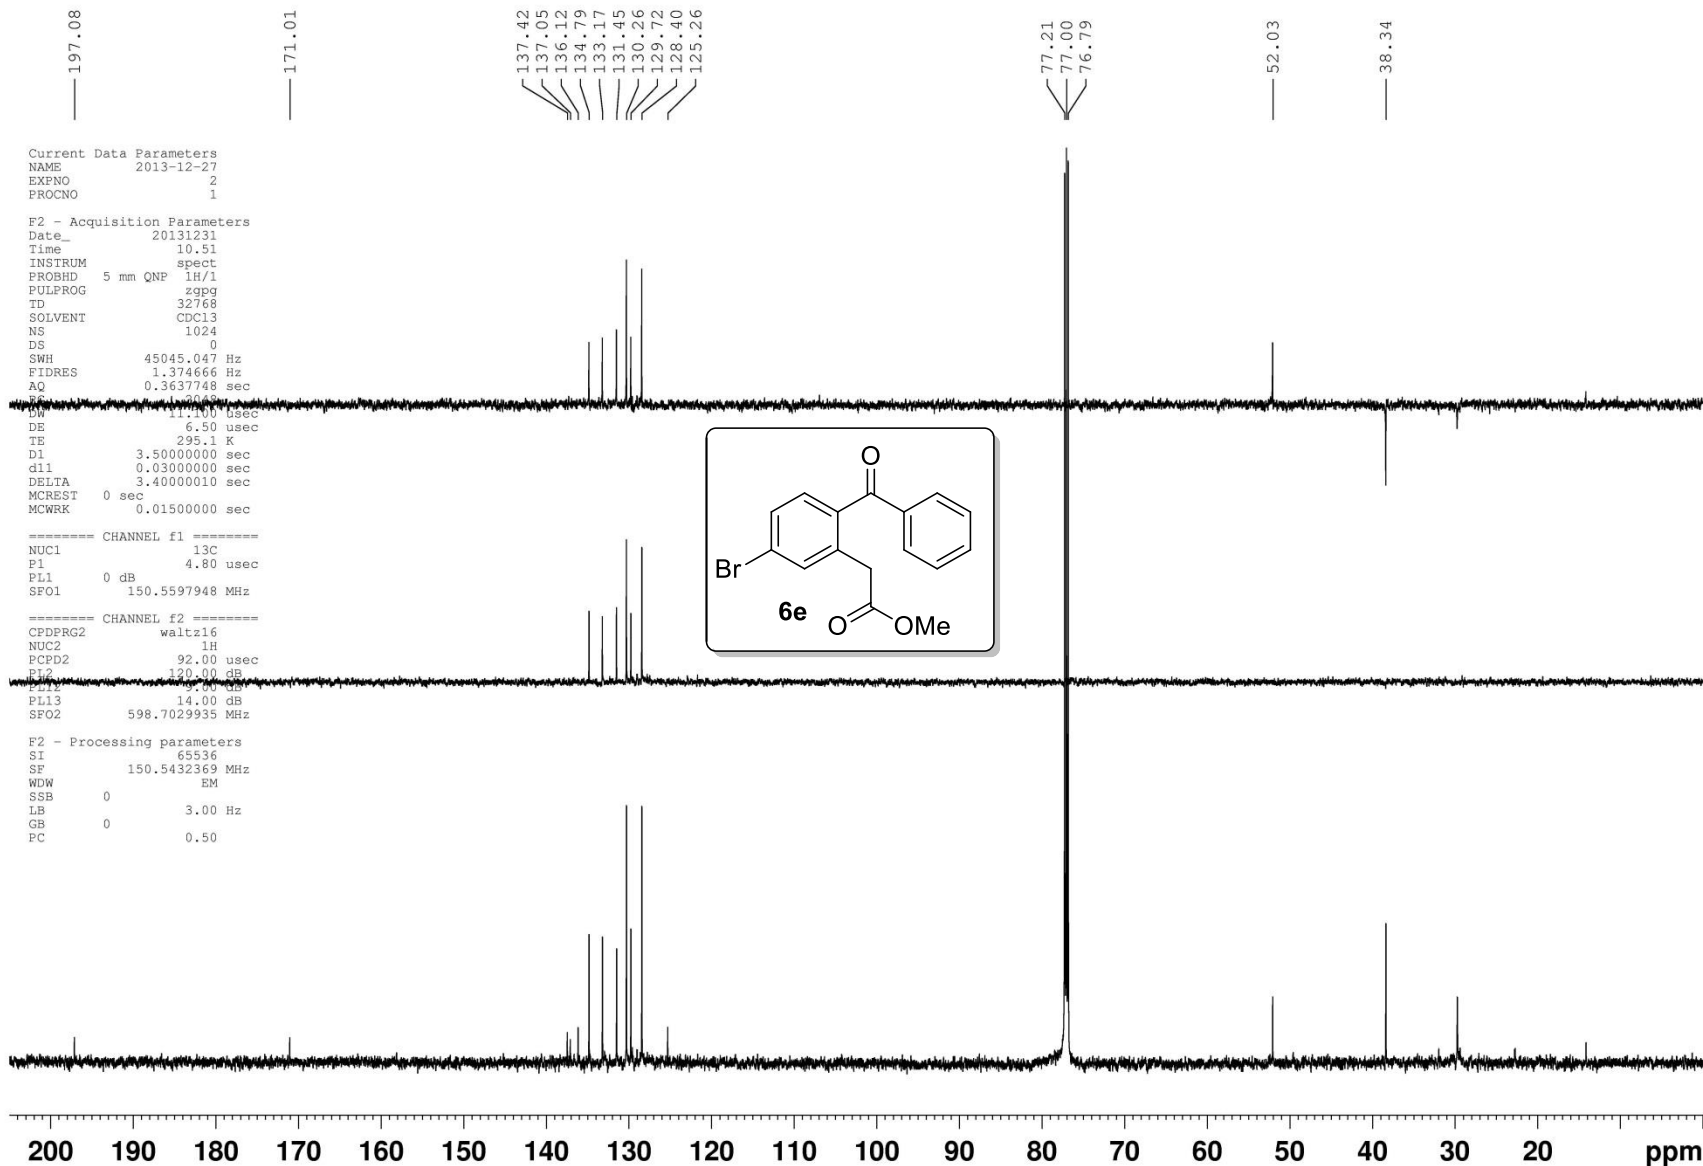

7.795  
7.789  
7.786  
7.784  
7.578  
7.576  
7.574  
7.567  
7.565  
7.564  
7.562  
7.561  
7.558  
7.554  
7.551  
7.549  
7.545  
7.474  
7.471  
7.461  
7.459  
7.455  
7.453  
7.449  
7.446  
7.444  
7.443  
7.442  
7.440  
7.436  
7.433  
7.430  
7.427  
7.387  
7.385  
7.375  
7.372  
7.355  
7.354  
7.342  
7.341  
7.340  
7.337  
7.333  
7.331  
7.320  
7.318  
7.308  
7.306  
7.240

Current Data Parameters  
 NAME 2013-12-04  
 EXPNO 1  
 PROCNO 1

F2 - Acquisition Parameters  
 Date\_ 20131204  
 Time 13.06  
 INSTRUM spect  
 PROBHD 5 mm QNP 1H/1  
 PULPROG zg  
 TD 32768  
 SOLVENT CDC13  
 NS 16  
 DS 0  
 SWH 8389.262 Hz  
 FIDRES 0.256020 Hz  
 AQ 1.9530228 sec  
 RG 256  
 DW 59.600 usec  
 DE 6.50 usec  
 TE 569.1 K  
 D1 2.0000000 sec  
 MCREST 0 sec  
 MCWRK 0.01500000 sec

----- CHANNEL f1 -----  
 NUC1 1H  
 P1 10.00 usec  
 PL1 0 dB  
 SFO1 598.7029935 MHz

F2 - Processing parameters  
 SI 32768  
 SF 598.7000263 MHz  
 WDW no  
 SSB 0  
 LB 0 Hz  
 GB 0  
 PC 1.00

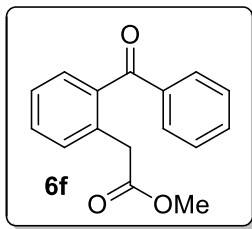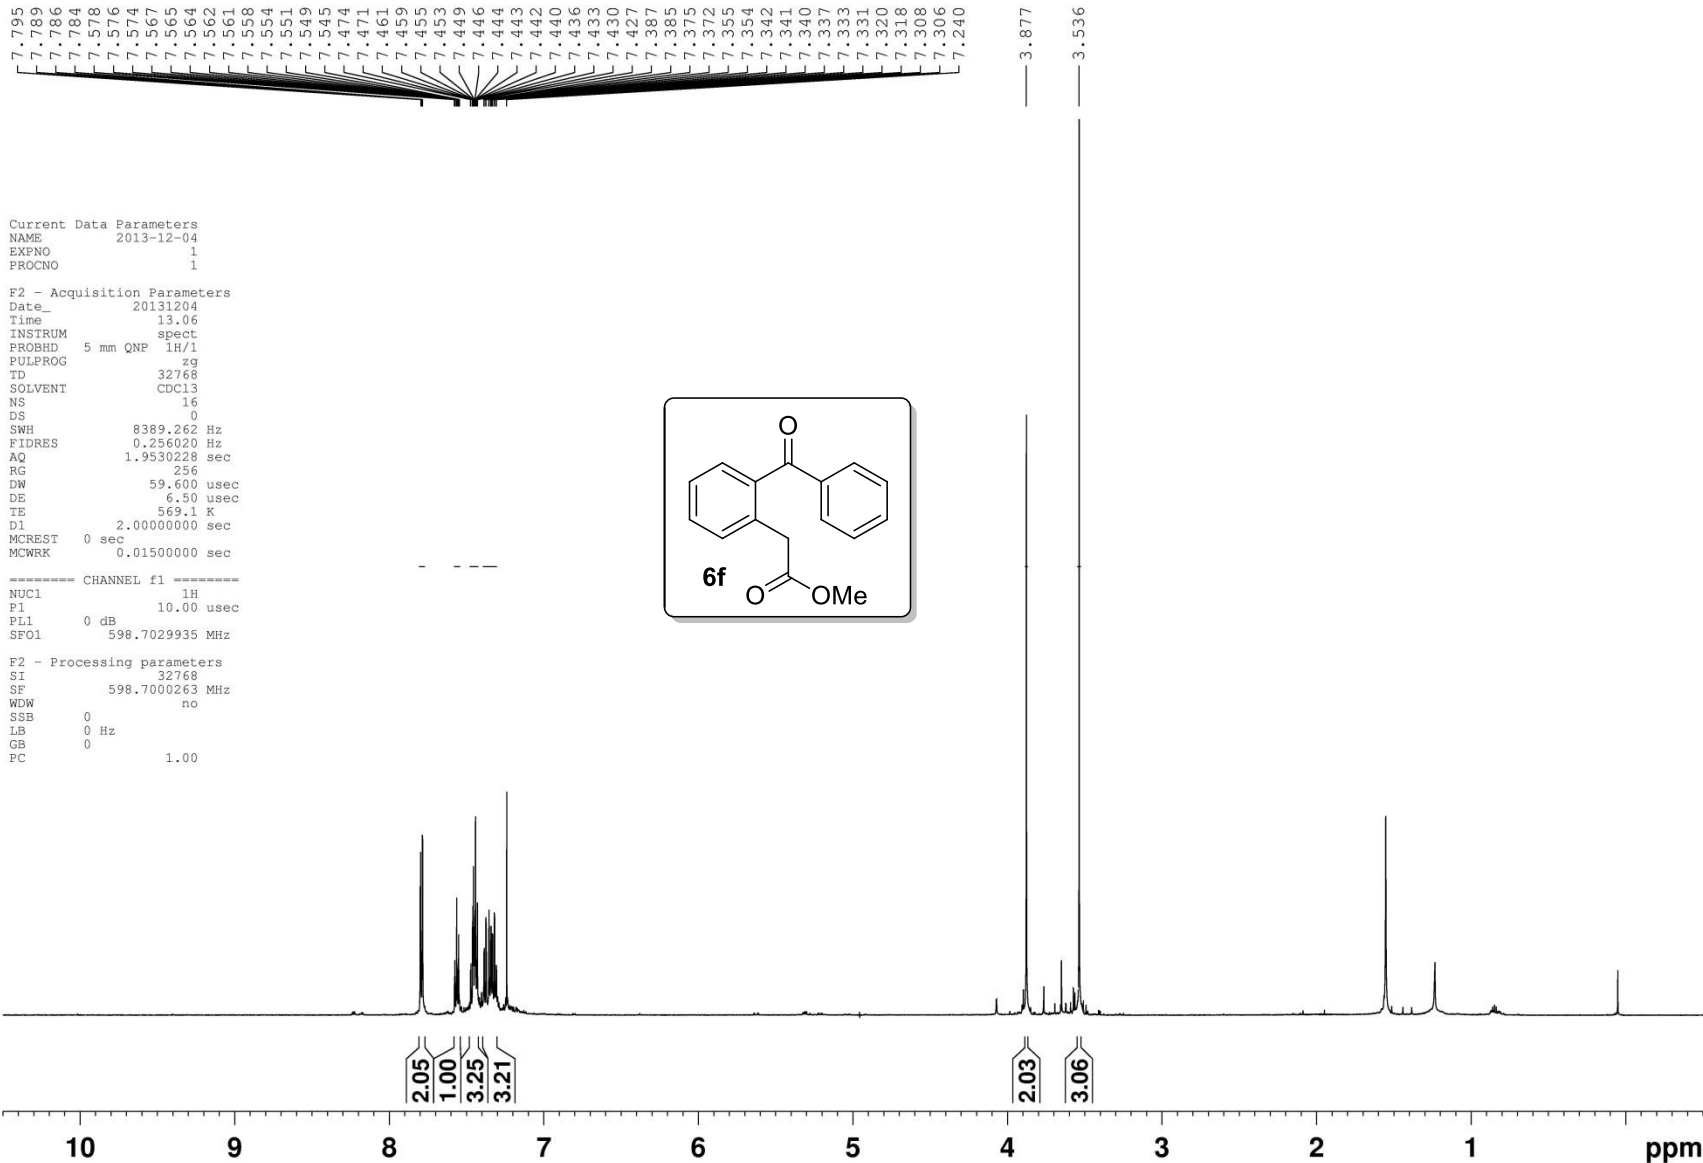

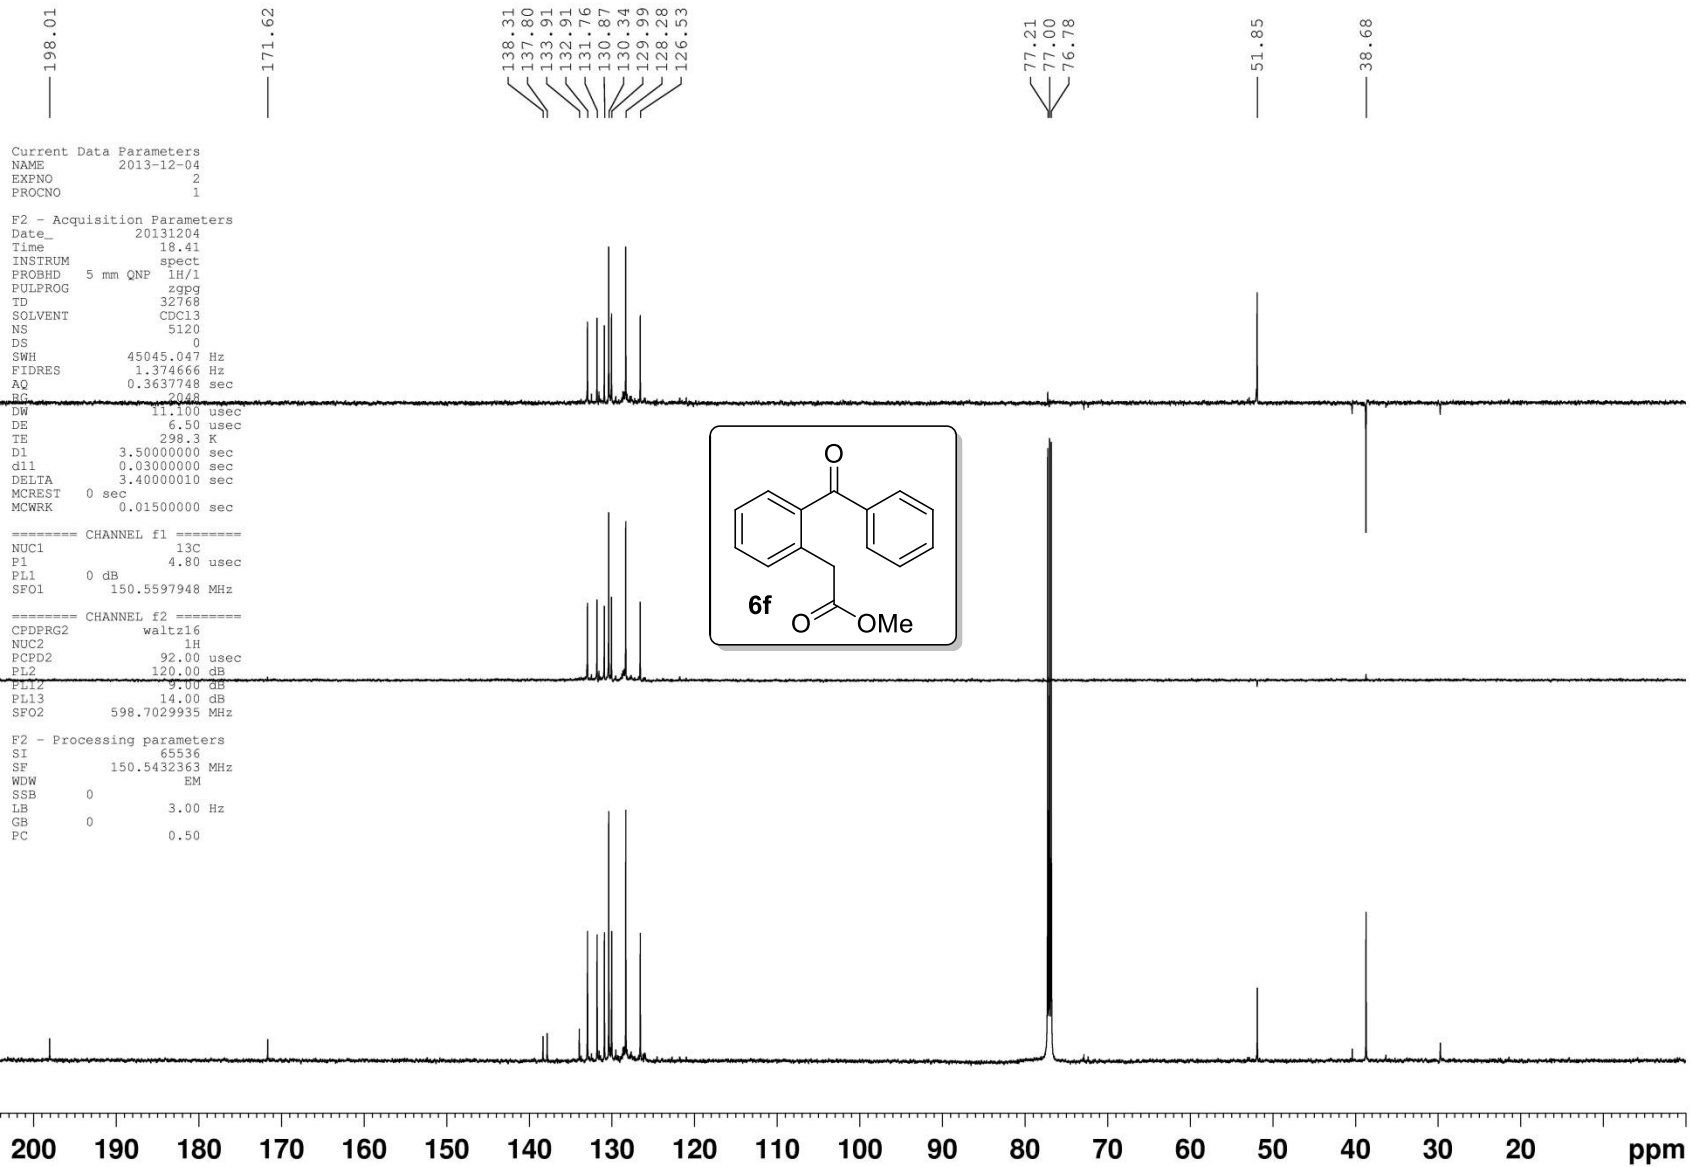

Current Data Parameters  
 NAME 2013-12-04  
 EXPNO 2  
 PROCNO 1

F2 - Acquisition Parameters  
 Date\_ 20131204  
 Time 18.41  
 INSTRUM spect  
 PROBHD 5 mm QNP 1H/1  
 PULPROG zgpg  
 TD 32768  
 SOLVENT CDCl3  
 NS 5120  
 DS 0  
 SWH 45045.047 Hz  
 FIDRES 1.374666 Hz  
 AQ 0.3637748 sec  
 RG 7048  
 DW 11.100 usec  
 DE 6.50 usec  
 TE 298.3 K  
 D1 3.50000000 sec  
 d11 0.03000000 sec  
 DELTA 3.40000010 sec  
 MCREST 0 sec  
 MCWRK 0.01500000 sec

==== CHANNEL f1 =====  
 NUC1 13C  
 P1 4.80 usec  
 PL1 0 dB  
 SFO1 150.5597948 MHz

==== CHANNEL f2 =====  
 CPDPRG2 waltz16  
 NUC2 1H  
 PCPD2 92.00 usec  
 PL2 120.00 dB  
 PL12 9.00 dB  
 PL13 14.00 dB  
 SFO2 598.7029935 MHz

F2 - Processing parameters  
 SI 65536  
 SF 150.5432363 MHz  
 WDW EM  
 SSB 0  
 LB 3.00 Hz  
 GB 0  
 PC 0.50

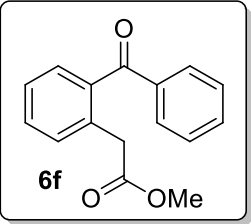

138.31  
 137.80  
 133.91  
 132.91  
 131.76  
 130.87  
 130.34  
 129.99  
 128.28  
 126.53

77.21  
 77.00  
 76.78

51.85

38.68

200 190 180 170 160 150 140 130 120 110 100 90 80 70 60 50 40 30 20 ppm

```

Current Data Parameters
NAME      2013-11-24-1
EXPNO    1
PROCNO   1

F2 - Acquisition Parameters
Date_    20131128
Time     12.47
INSTRUM  spect
PROBHD   5 mm QNP 1H/1
PULPROG  zgpr
TD       41106
SOLVENT  CDCl3
NS       16
DS       0
SWH      8389.262 Hz
FIDRES   0.204088 Hz
AQ       2.4499676 sec
RG       256
DW       59.600 usec
DE       6.50 usec
TE       294.9 K
D1       2.00000000 sec
d12      0.00002000 sec
MCREST   0 sec
MCWRK    0.01500000 sec

===== CHANNEL f1 =====
NUC1     1H
P1       8.90 usec
PL1     3.00 dB
PL9     30.00 dB
SFO1    598.7038915 MHz

F2 - Processing parameters
SI       32768
SF       598.7000255 MHz
WDW      no
SSB      0
LB       0 Hz
GB       0
PC       1.00

```

7.798  
7.796  
7.784  
7.782  
7.580  
7.578  
7.575  
7.568  
7.567  
7.565  
7.564  
7.563  
7.555  
7.553  
7.551  
7.458  
7.455  
7.445  
7.444  
7.442  
7.435  
7.433  
7.432  
7.274  
7.273  
7.271  
7.260  
7.258  
7.241  
7.234  
7.221  
7.179

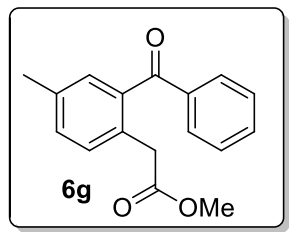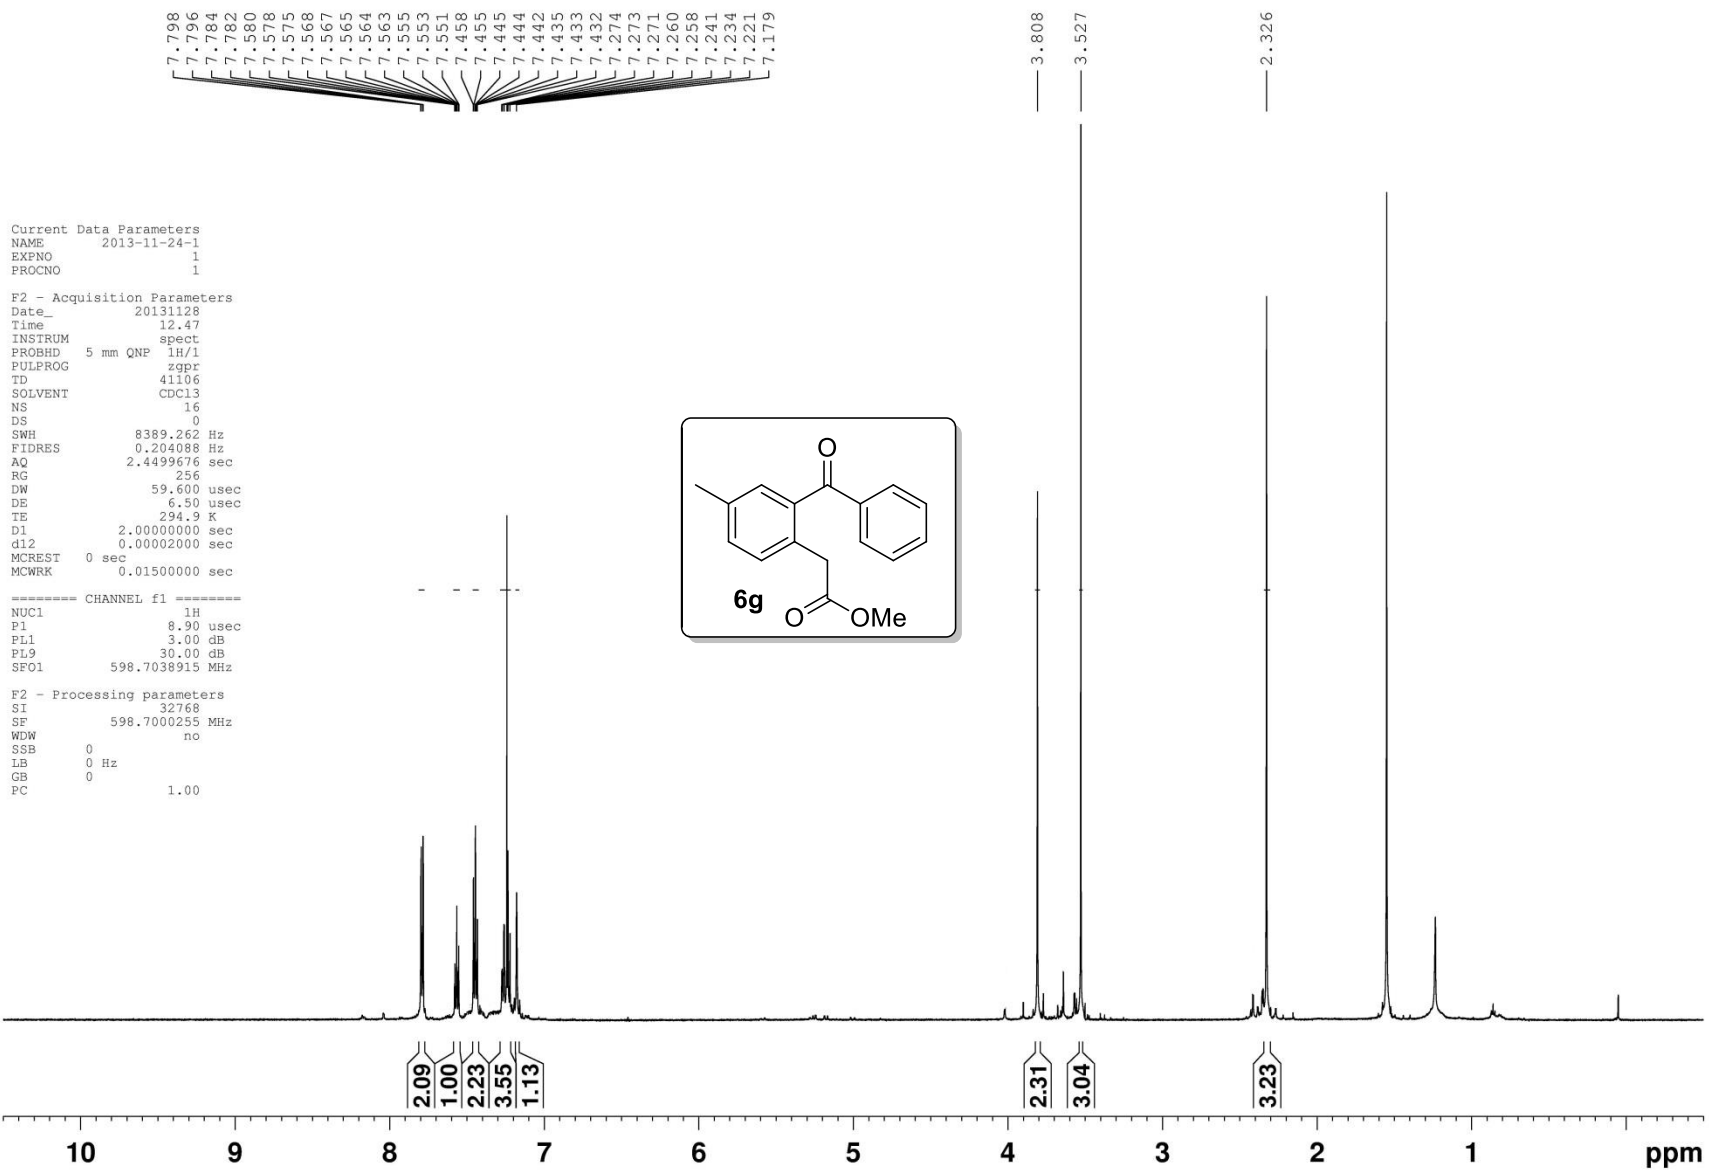



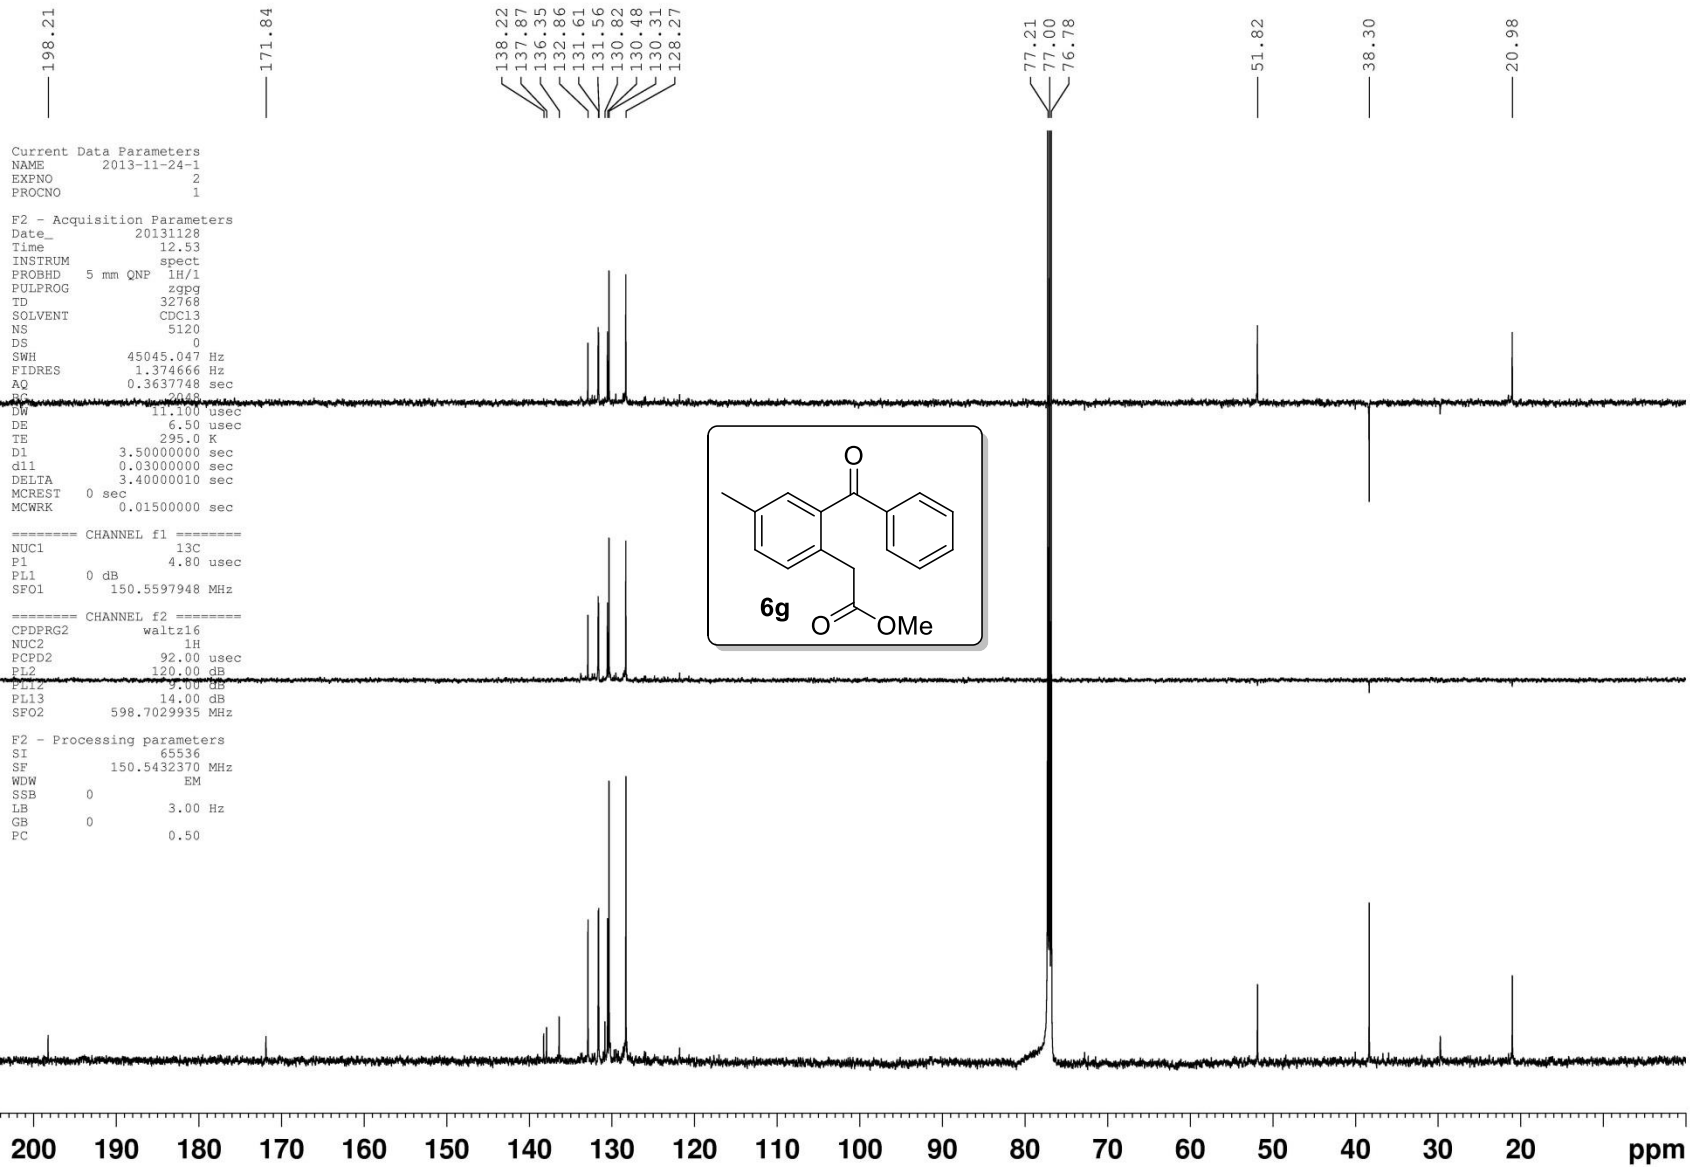

Current Data Parameters  
 NAME 2013-11-24-1  
 EXPNO 2  
 PROCNO 1

F2 - Acquisition Parameters  
 Date\_ 20131128  
 Time 12.53  
 INSTRUM spect  
 PROBHD 5 mm QNP 1H/1  
 PULPROG zgpg  
 TD 32768  
 SOLVENT CDCl3  
 NS 5120  
 DS 0  
 SWH 45045.047 Hz  
 FIDRES 1.374666 Hz  
 AQ 0.3637748 sec  
 DE 11.100 usec  
 TE 295.0 K  
 D1 3.50000000 sec  
 d11 0.03000000 sec  
 DELTA 3.40000010 sec  
 MCREST 0 sec  
 MCWRK 0.01500000 sec

==== CHANNEL f1 =====  
 NUC1 13C  
 P1 4.80 usec  
 PL1 0 dB  
 SFO1 150.5597948 MHz

==== CHANNEL f2 =====  
 CPDPRG2 waltz16  
 NUC2 1H  
 PCPD2 92.00 usec  
 PL2 120.00 dB  
 PL12 9.00 dB  
 PL13 14.00 dB  
 SFO2 598.7029935 MHz

F2 - Processing parameters  
 SI 65536  
 SF 150.5432370 MHz  
 WDW EM  
 SSB 0  
 LB 3.00 Hz  
 GB 0  
 PC 0.50

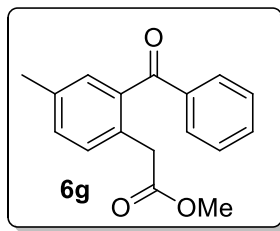

Current Data Parameters  
 NAME 2013-12-15  
 EXPNO 1  
 PROCNO 1

F2 - Acquisition Parameters  
 Date\_ 20131213  
 Time 13.20  
 INSTRUM spect  
 PROBHD 5 mm QNP 1H/1  
 PULPROG zg  
 TD 32768  
 SOLVENT CDCl3  
 NS 32  
 DS 0  
 SWH 8382.222 Hz  
 FIDRES 0.255805 Hz  
 AQ 1.9546632 sec  
 RG 512  
 DW 59.650 usec  
 DE 6.50 usec  
 TE 296.1 K  
 D1 2.0000000 sec  
 MCREST 0 sec  
 MCWRK 0.01500000 sec

----- CHANNEL f1 -----  
 NUC1 1H  
 P1 10.00 usec  
 PL1 0 dB  
 SFO1 598.7029935 MHz

F2 - Processing parameters  
 SI 32768  
 SF 598.7000262 MHz  
 WDW no  
 SSB 0  
 LB 0 Hz  
 GB 0  
 PC 1.00

7.808  
7.796  
7.793  
7.581  
7.579  
7.567  
7.557  
7.555  
7.479  
7.475  
7.465  
7.461  
7.447  
7.434  
7.385  
7.381  
7.276  
7.263  
7.240

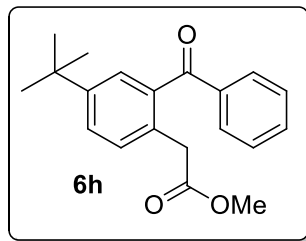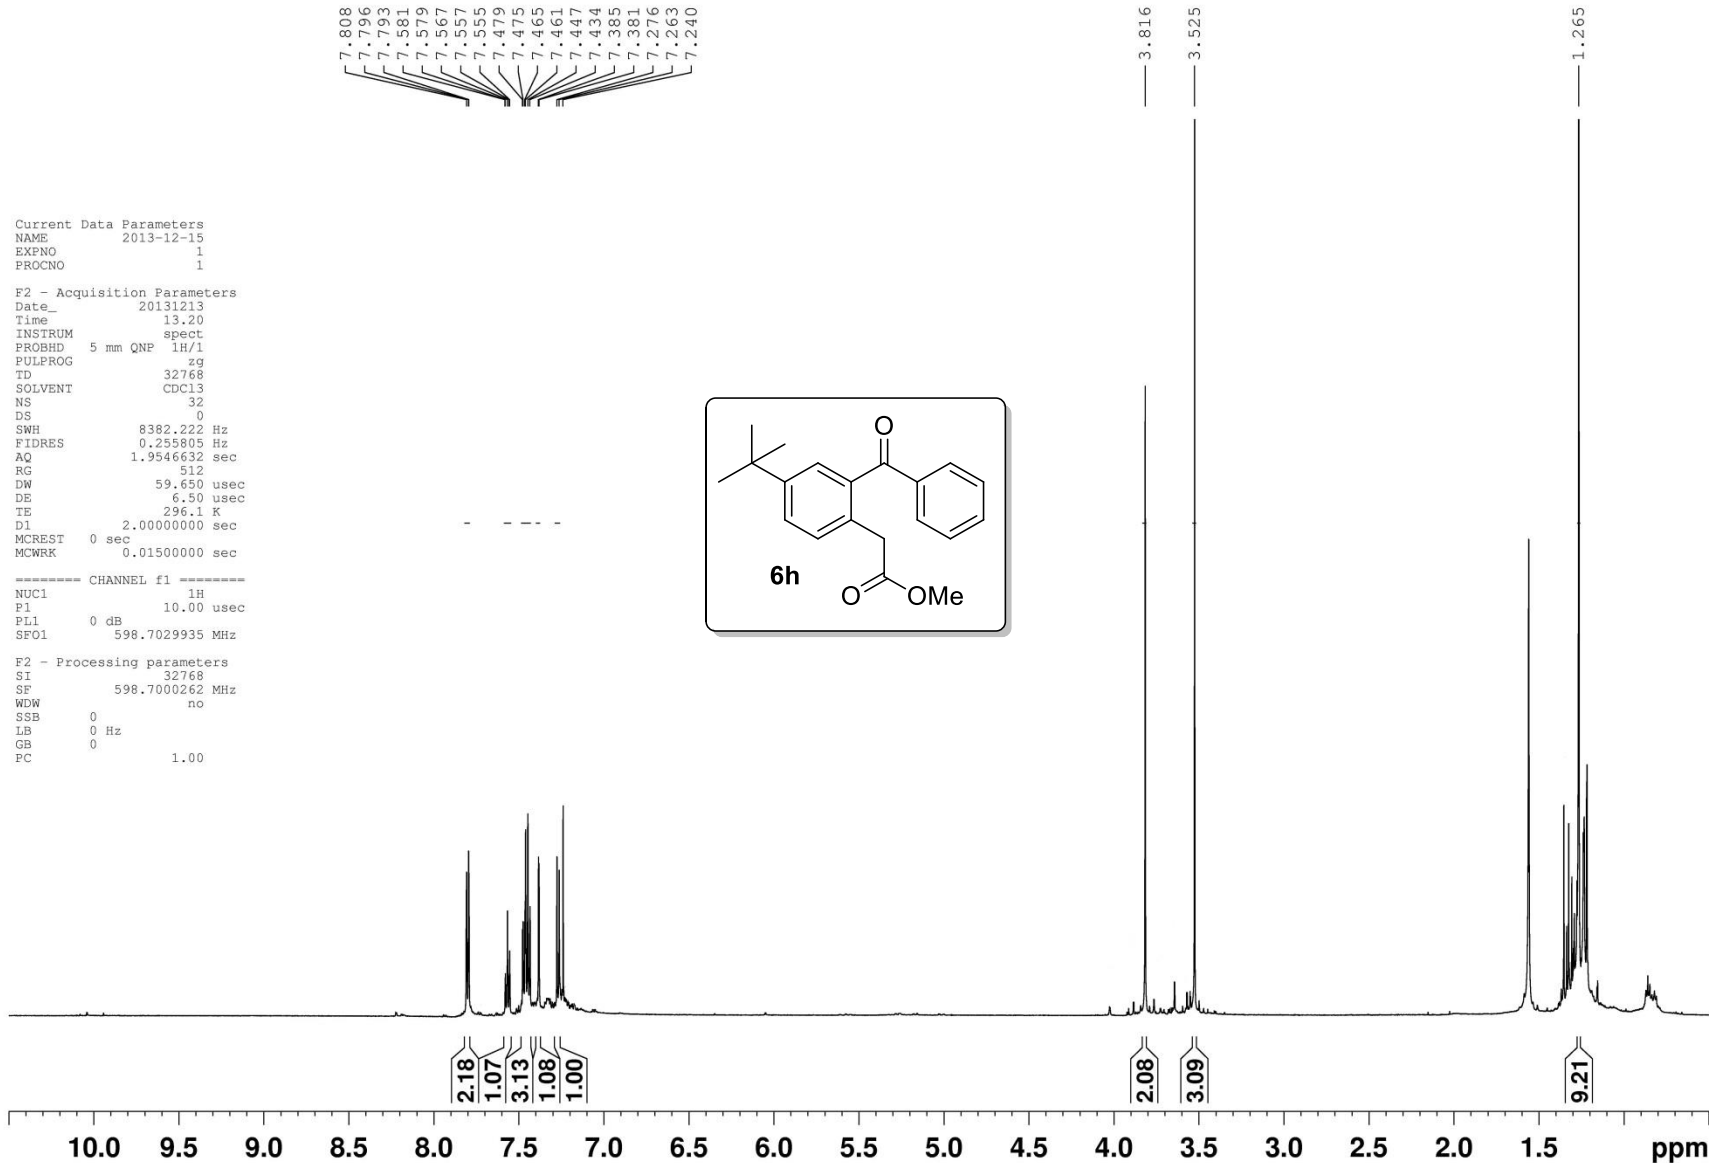

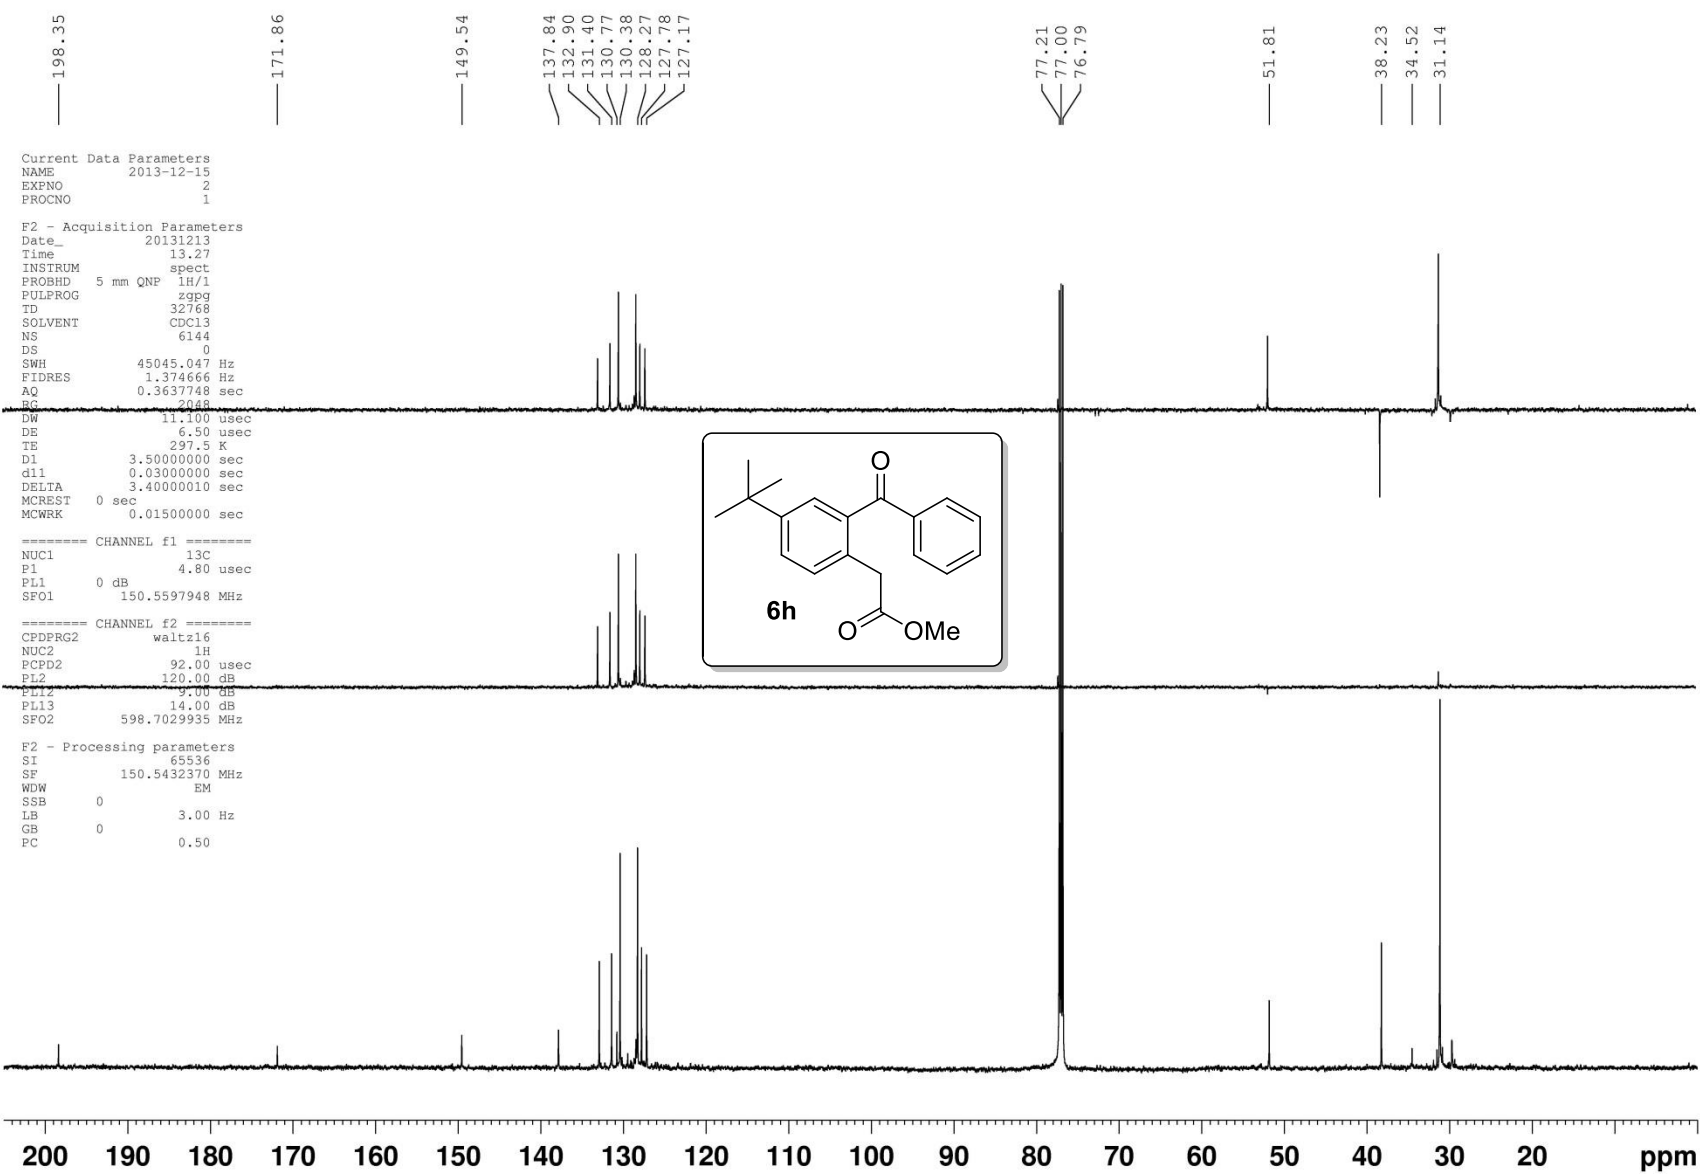

Current Data Parameters  
NAME 0403.fid  
EXPNO 1  
PROCNO 1  
F2 - Processing parameters  
SI 16384  
SF 499.8069095 MHz  
WDW EM  
SSB 0  
LB 0.30 Hz  
GB 0  
PC 1.00

7.775  
7.761  
7.759  
7.563  
7.548  
7.533  
7.445  
7.430  
7.414  
7.300  
7.284  
7.240  
7.152  
7.122  
7.106

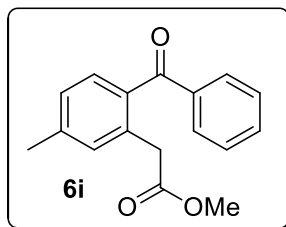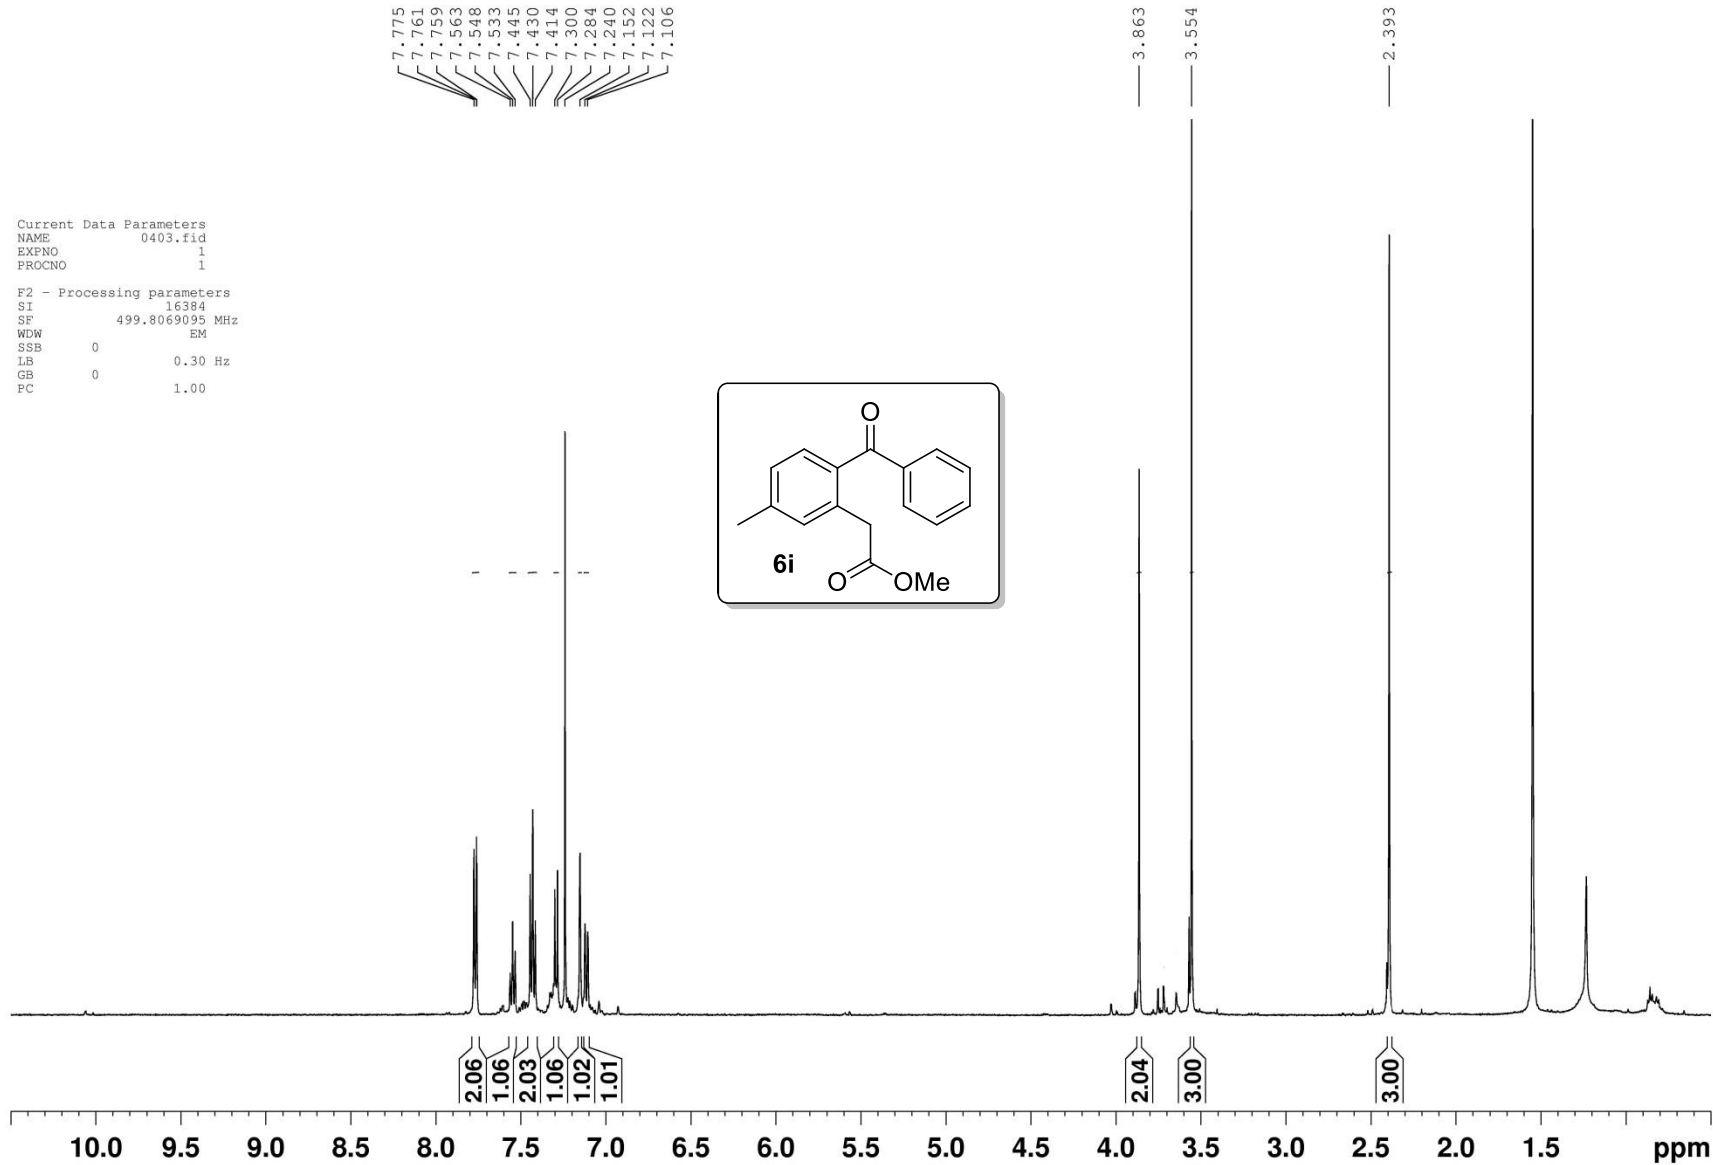

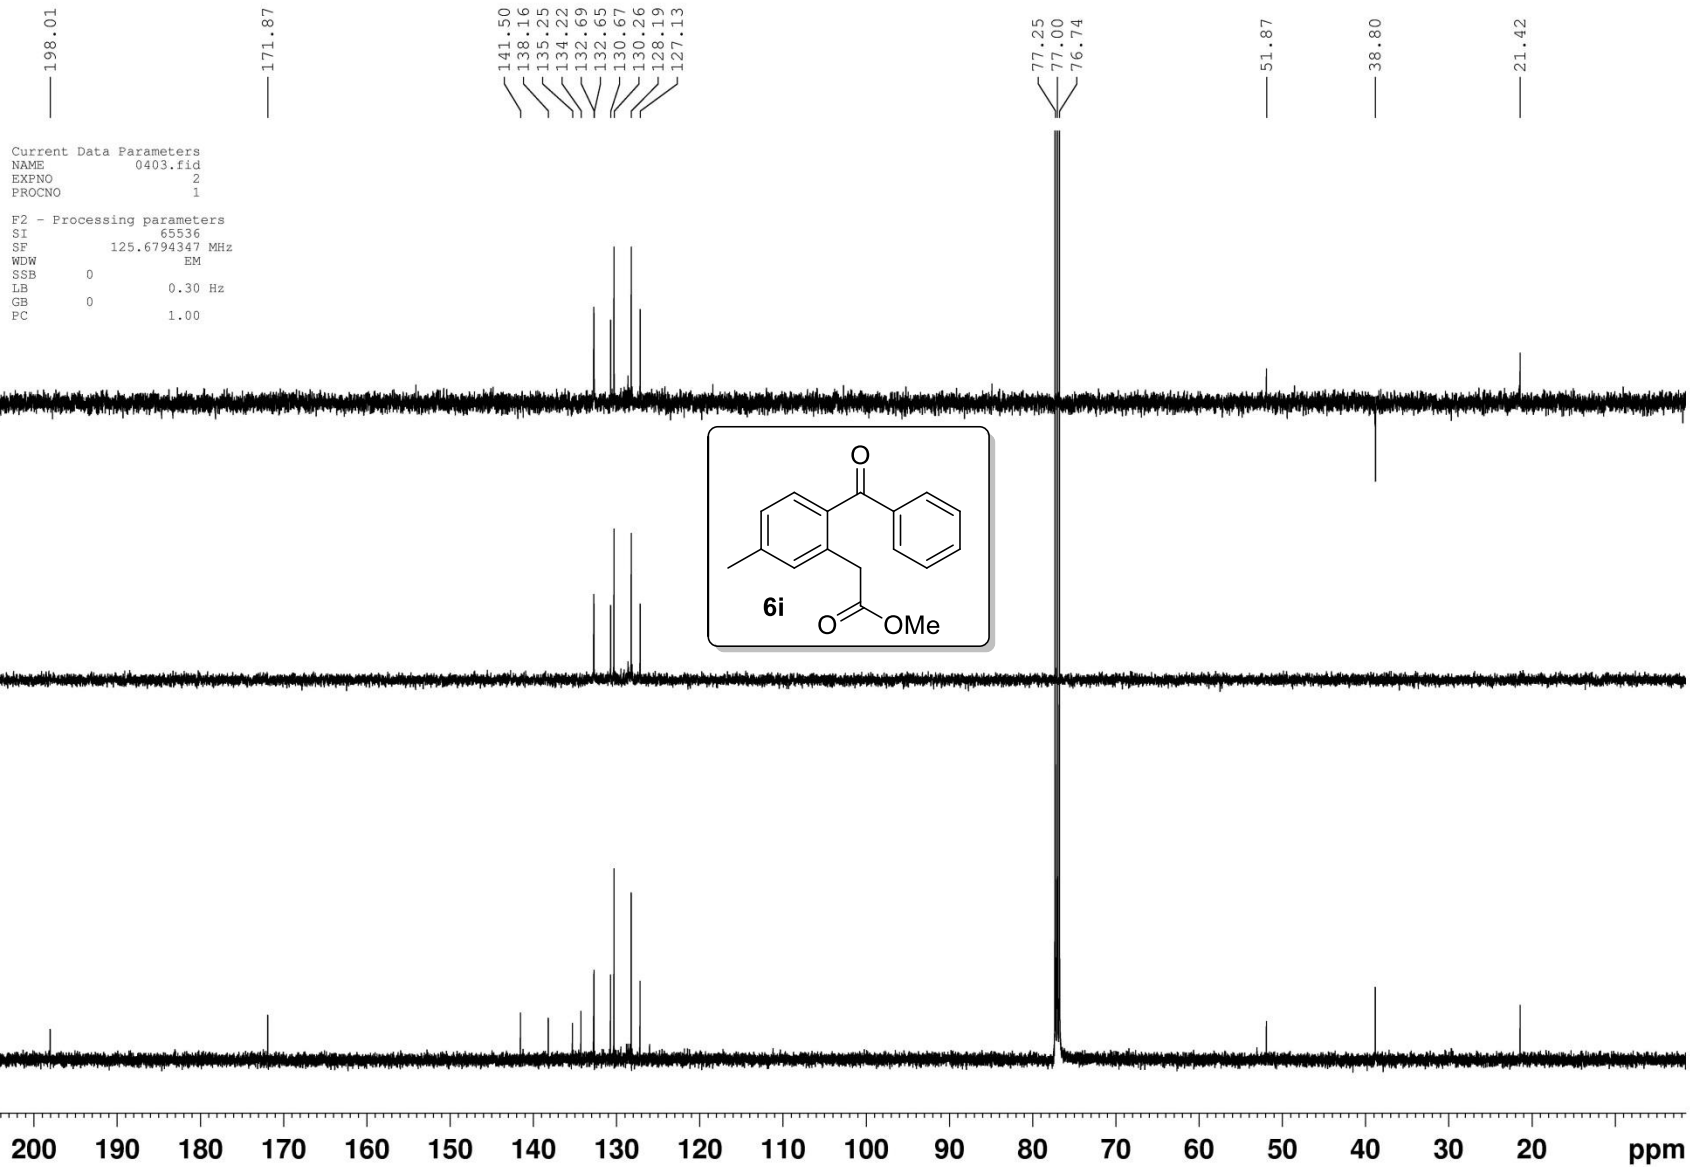

Current Data Parameters  
NAME 0403.fid  
EXPNO 2  
PROCNO 1

F2 - Processing parameters  
SI 65536  
SF 125.6794347 MHz  
WDW EM  
SSB 0  
LB 0.30 Hz  
GB 0  
PC 1.00

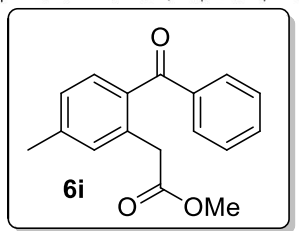

Current Data Parameters  
 NAME 2013-12-31-1  
 EXPNO 1  
 PROCNO 1

F2 - Acquisition Parameters  
 Date\_ 20140106  
 Time 13.25  
 INSTRUM spect  
 PROBHD 5 mm QNP 1H/1  
 PULPROG zg  
 TD 32768  
 SOLVENT CDCl3  
 NS 32  
 DS 0  
 SWH 8389.262 Hz  
 FIDRES 0.256020 Hz  
 AQ 1.9530228 sec  
 RG 512  
 DW 59.600 usec  
 DE 6.50 usec  
 TE 292.6 K  
 D1 2.0000000 sec  
 MCREST 0 sec  
 MCWRK 0.01500000 sec

----- CHANNEL f1 -----  
 NUC1 1H  
 P1 10.00 usec  
 PL1 0 dB  
 SFO1 598.7029935 MHz

F2 - Processing parameters  
 SI 32768  
 SF 598.7000257 MHz  
 WDW no  
 SSB 0  
 LB 0 Hz  
 GB 0  
 PC 1.00

7.800  
7.798  
7.786  
7.784  
7.567  
7.565  
7.563  
7.553  
7.542  
7.540  
7.538  
7.450  
7.438  
7.425  
7.424  
7.339  
7.326  
7.325  
7.317  
7.314  
7.304  
7.240

3.916

3.549

1.335

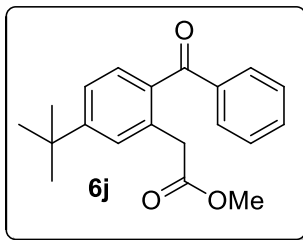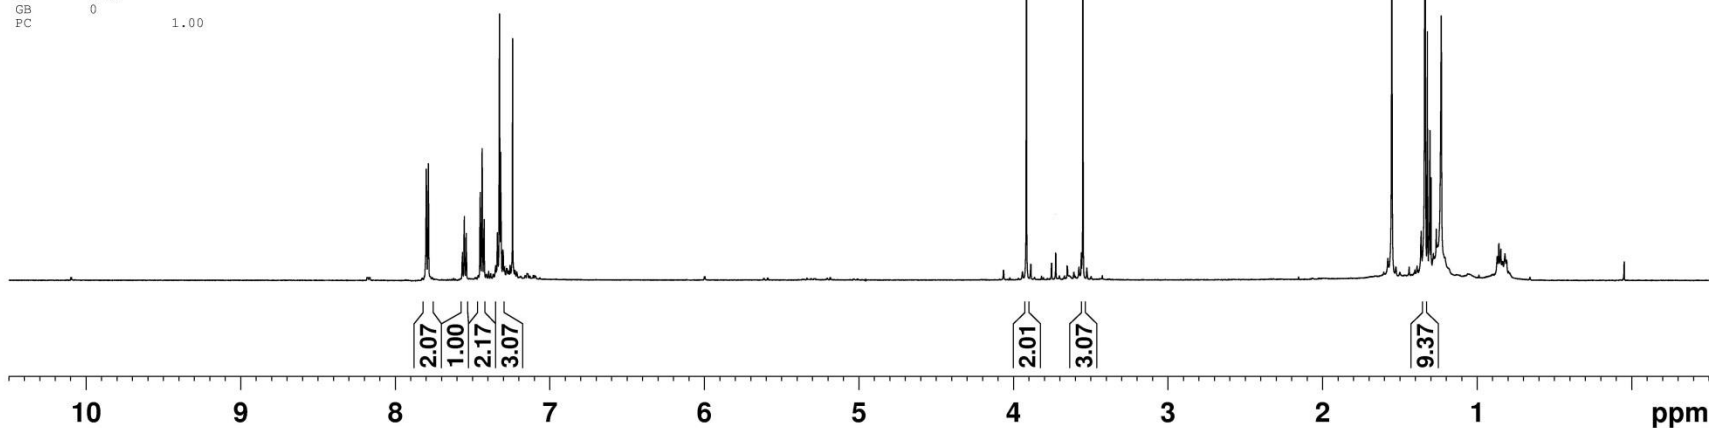

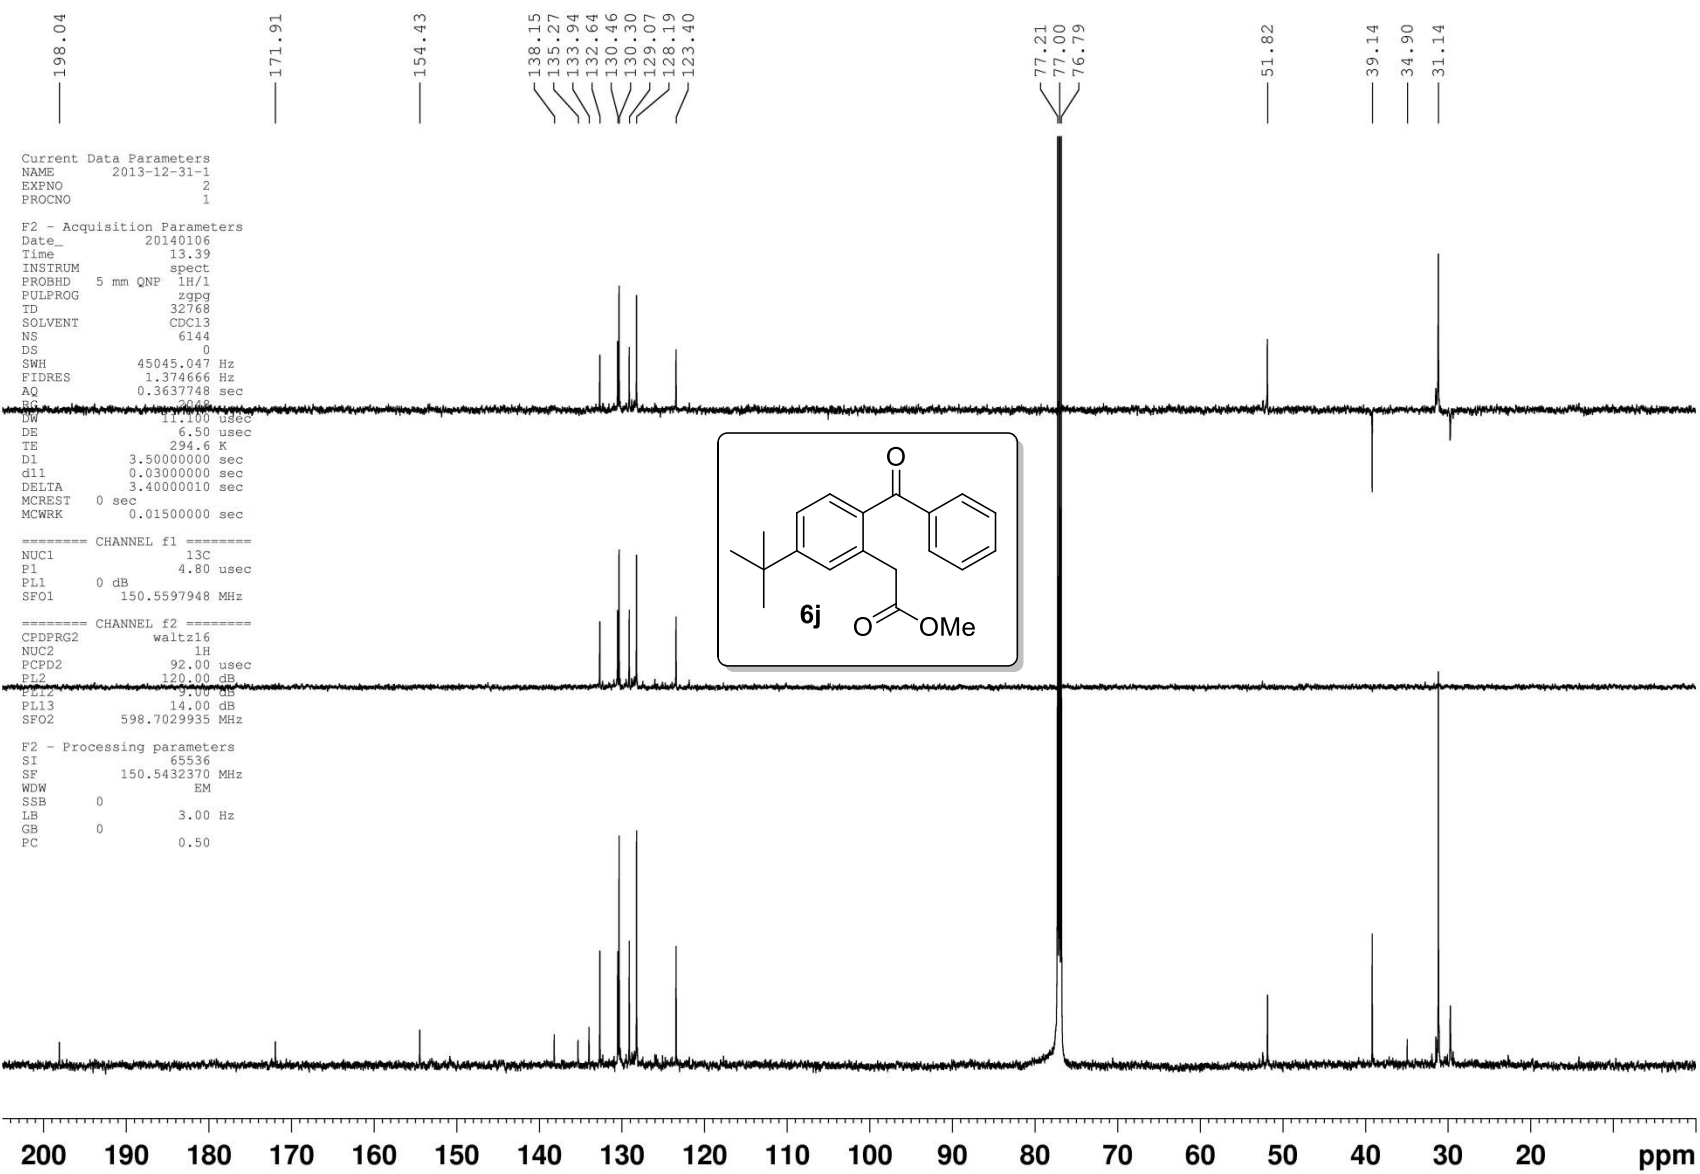

Current Data Parameters  
 NAME 2013-12-31-1  
 EXPNO 2  
 PROCNO 1

F2 - Acquisition Parameters  
 Date\_ 20140106  
 Time 13.39  
 INSTRUM spect  
 PROBHD 5 mm QNP 1H/1  
 PULPROG zgpg  
 TD 32768  
 SOLVENT CDCl3  
 NS 6144  
 DS 0  
 SWH 45045.047 Hz  
 FIDRES 1.374666 Hz  
 AQ 0.3637748 sec

DE 11.100 usec  
 TE 294.6 K  
 D1 3.50000000 sec  
 d11 0.03000000 sec  
 DELTA 3.40000010 sec  
 MCREST 0 sec  
 MCWRK 0.01500000 sec

==== CHANNEL f1 =====  
 NUC1 13C  
 P1 4.80 usec  
 PL1 0 dB  
 SFO1 150.5597948 MHz

==== CHANNEL f2 =====  
 CPDPRG2 waltz16  
 NUC2 1H  
 PCPD2 92.00 usec  
 PL2 120.00 dB  
 PL12 9.00 dB  
 PL13 14.00 dB  
 SFO2 598.7029935 MHz

F2 - Processing parameters  
 SI 65536  
 SF 150.5432370 MHz  
 WDW EM  
 SSB 0  
 LB 3.00 Hz  
 GB 0  
 PC 0.50

198.04  
 171.91  
 154.43  
 138.15  
 135.27  
 133.94  
 132.64  
 130.46  
 130.30  
 129.07  
 128.19  
 123.40  
 77.21  
 77.00  
 76.79  
 51.82  
 39.14  
 34.90  
 31.14

200 190 180 170 160 150 140 130 120 110 100 90 80 70 60 50 40 30 20 ppm

Current Data Parameters  
NAME 0430.fid  
EXPNO 1  
PROCNO 1  
F2 - Processing parameters  
SI 16384  
SF 499.8069093 MHz  
WDW EM  
SSB 0  
LB 0.30 Hz  
GB 0  
PC 1.00

7.696  
7.679  
7.425  
7.421  
7.409  
7.404  
7.339  
7.335  
7.286  
7.269  
7.252  
7.240

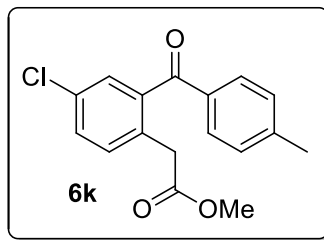

3.793  
3.525  
2.419

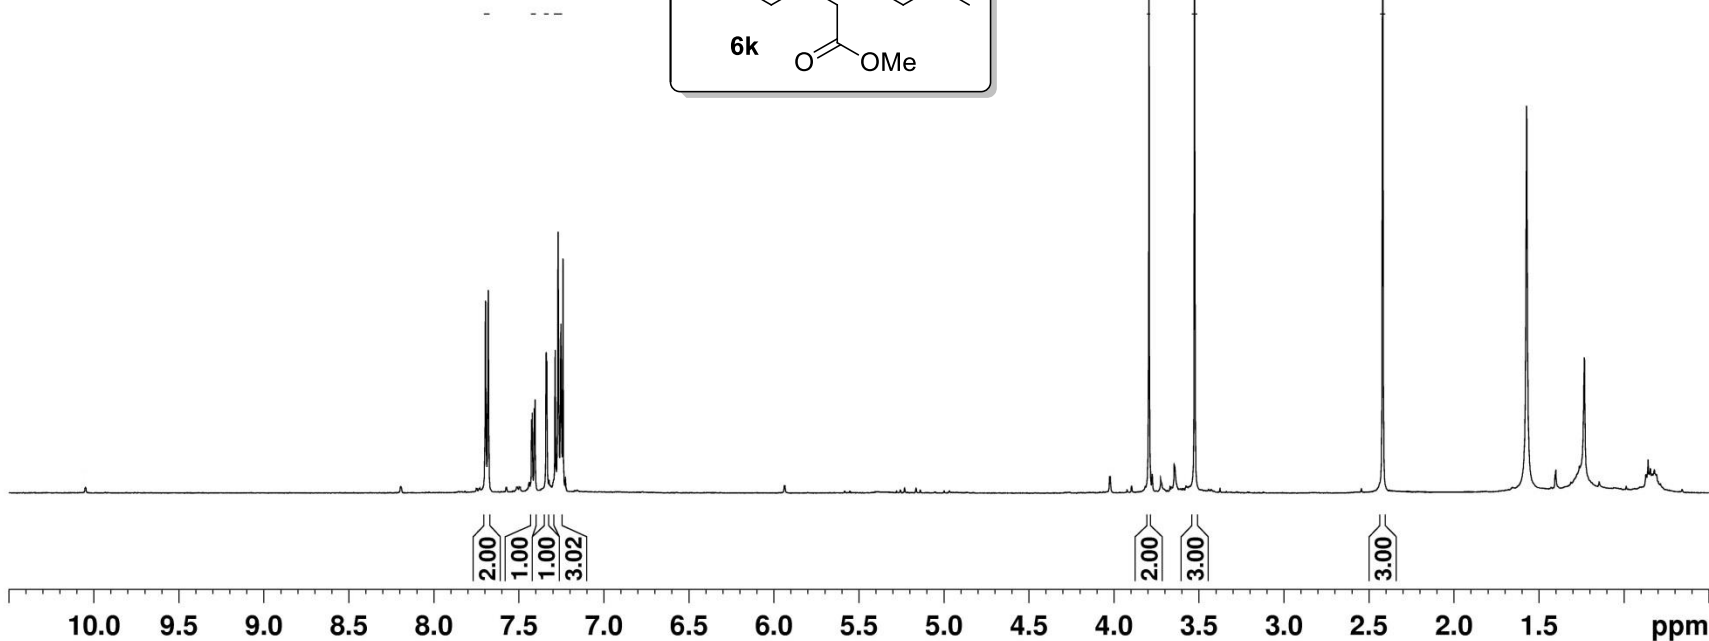



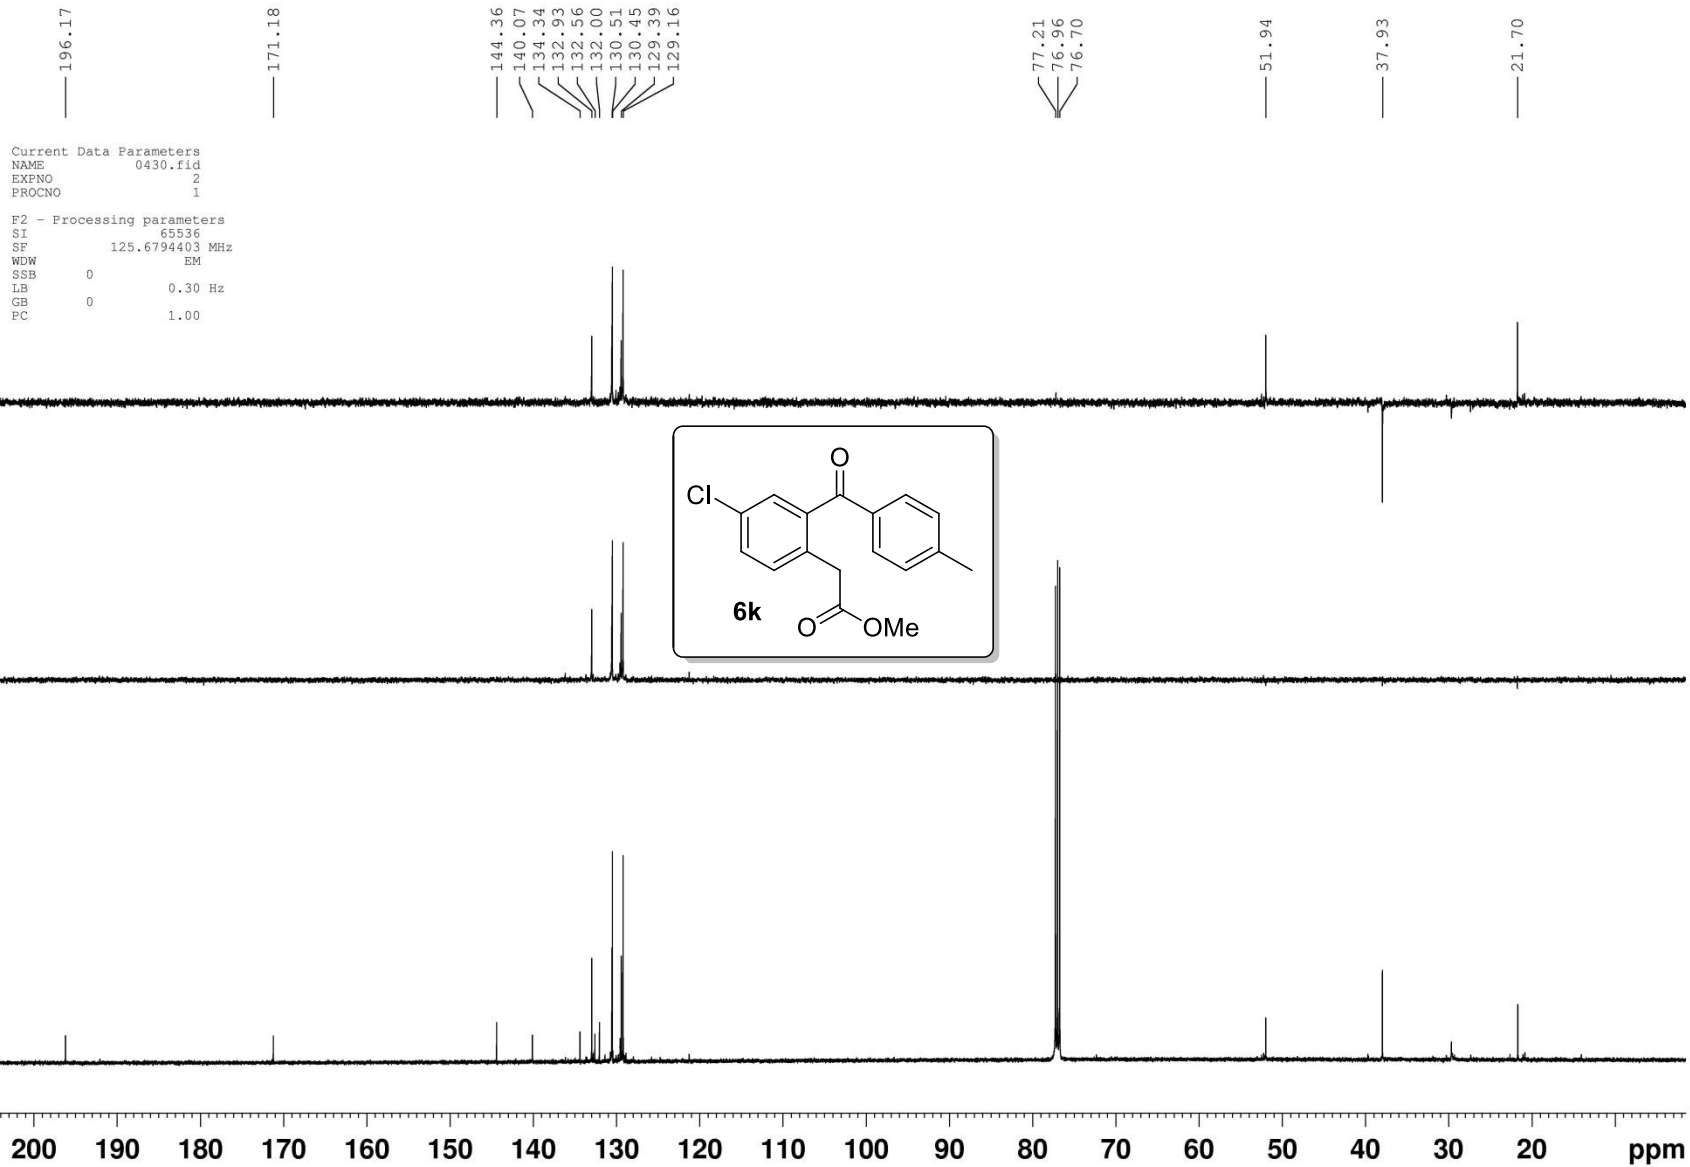

Current Data Parameters  
 NAME 0430.fid  
 EXPNO 2  
 PROCNO 1

F2 - Processing parameters  
 SI 65536  
 SF 125.6794403 MHz  
 WDW EM  
 SSB 0  
 LB 0 0.30 Hz  
 GB 0  
 PC 1.00

Current Data Parameters  
NAME 0429.fid  
EXPNO 1  
PROCNO 1  
F2 - Processing parameters  
SI 16384  
SF 499.8069093 MHz  
WDW EM  
SSB 0  
LB 0.30 Hz  
GB 0  
PC 1.00

7.749  
7.732  
7.454  
7.446  
7.441  
7.437  
7.429  
7.425  
7.315  
7.311  
7.290  
7.273  
7.240

3.826  
3.536

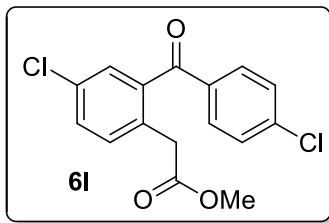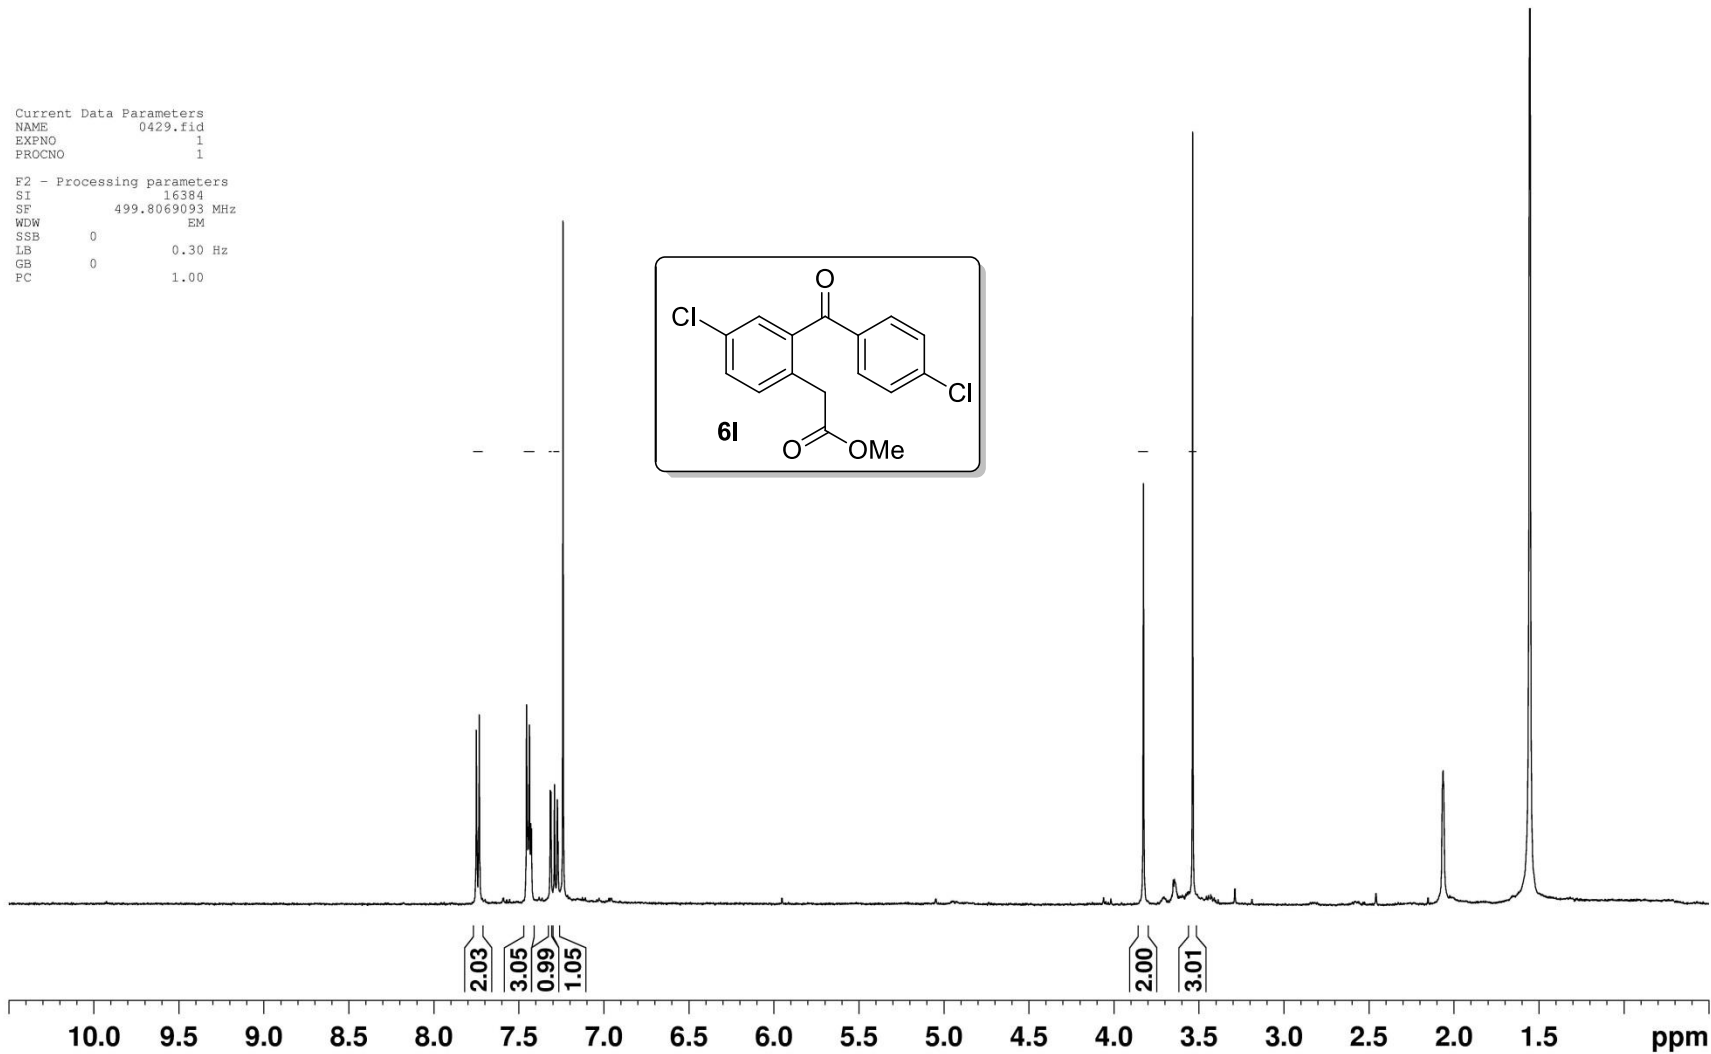

— 195.32

— 171.13

139.89  
139.36  
135.27  
133.13  
132.72  
132.23  
131.64  
130.93  
129.40  
128.81

77.20  
76.95  
76.69

— 52.01

— 37.85

Current Data Parameters  
NAME 0429.fid  
EXPNO 2  
PROCNO 1  
  
F2 - Processing parameters  
SI 65536  
SF 125.6794403 MHz  
WDW EM  
SSB 0  
LB 0.30 Hz  
GB 0  
PC 1.00

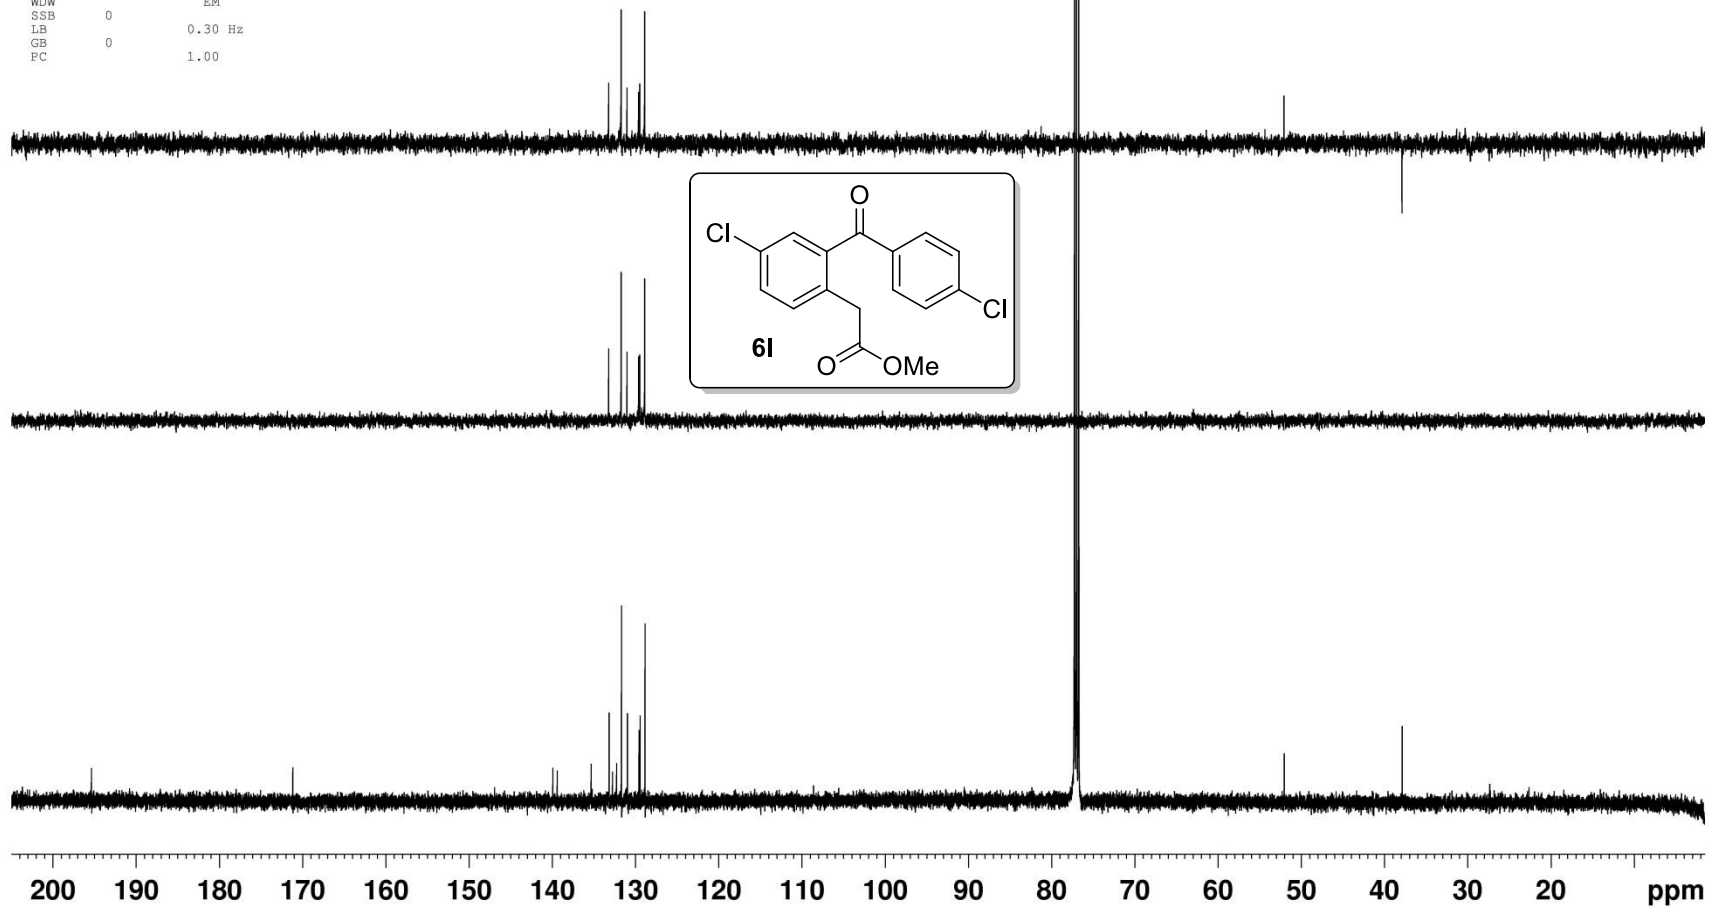

Supplement: c4ob01794c1.pdf [file c4ob01794c1.pdf]
